# Supplementary material for: Candidate HPV-Specific T-Cells Expand in the Tumor Microenvironment During Chemoradiotherapy
Source: Research Square preprint supplement (doi:10.21203/rs.3.rs-105933/v1), 2021-03-16
Supplement: Supplementary file 2 [file 1fabfefa4ffa8b622a07c4df.xlsx]

## Sheet: Sheet1
		Blood Samples							Tumor Samples							Week 1			Week 3				Week 5			Follow-up
	Flow Variables	T1	T2	T3	T4	T5		Flow Variables	T1	T2	T3	T4	T5		Flow Variables	Blood	Tumor	P	Blood	Tumor		P	Blood	Tumor	P	Blood	Tumor	P
	CD11b+CD11c-CD40+	22.3655	8.81167	4.99*	5.0707	26.1022		CD11b+CD11c-CD40+	10.375	21.5235	4.75	8.1085	16.395		CD11b+CD11c-CD40+	-2.31398	1.91619	1	-2.94606	-3.11151		1	-2.53846	-0.257354	0.625	0.184249	0.815942	1
	CD11b+CD11c-CD40+ (% Live Lymphocytes)	1.78791	0.632333	0.18*	0.321049	1.80022		CD11b+CD11c-CD40+ (% Live Lymphocytes)	0.4792	1.0855	0.929004	2.04971	1.20482		CD11b+CD11c-CD40+ (% Live Lymphocytes)	-3.31536	1.38002	0.8125	-3.53605	-0.159941		0.5625	-3.10852	1.2022	0.25	-0.775698	-0.130238	1
	CD11b+CD40+ (% Live Lymphocytes)	6.91636	10.4942	14.2947	23.698	1.87*		CD11b+CD40+ (% Live Lymphocytes)	4.6367	4.0078	6.13747	1.25683	0.748333		CD11b+CD40+ (% Live Lymphocytes)	-0.622	-0.0282837	0.6875	0.647427	1.16656		0.15625	0.916232	-0.646212	0.875	-1.61467	-1.26635	1
	CD11c+CD11b+ (% Live Lymphocytes)	10.5758	16.52*	26.19*	33.5*	12		CD11c+CD11b+ (% Live Lymphocytes)	4.0819	5.0925	6.34877	2.29843	0.592667		CD11c+CD11b+ (% Live Lymphocytes)	-0.245976	-0.712084	0.640625	0.355282	-0.809245		0.375	1.84475	0.0150282	0.3125	0.485427	-1.79442	0.25
	CD11c+CD11b- (% Live Lymphocytes)	1.67917	2.34917	2.28417	3.94*	4.39111		CD11c+CD11b- (% Live Lymphocytes)	5.0899	3.5368	6.32933	2.48143	0.686		CD11c+CD11b- (% Live Lymphocytes)	0.694849	1.23655	0.640625	1.45029	-0.405256		0.375	1.25992	-0.0415791	0.0625	0.845998	-2.32232	0.25
	CD11c+CD40+ (% Live Lymphocytes)	6.34727	7.15417	15.0907	23.26*	2.12556		CD11c+CD40+ (% Live Lymphocytes)	2.0611	1.2565	2.72711	0.716667	0.04*		CD11c+CD40+ (% Live Lymphocytes)	0.671377	-0.413653	0.296875	2.09766	0.31719		0.09375	0.93152	-1.49878	0.125	-1.16044	-10.4906	0.5
	CD11c+CD86+ (% Live Lymphocytes)	3.374	6.29167	11.7675	10.321	7.18667		CD11c+CD86+ (% Live Lymphocytes)	3.69419	2.2624	2.03067	0.729857	0.1665		CD11c+CD86+ (% Live Lymphocytes)	2.31023	-0.0208373	0.382812	1.52997	2.64386		0.15625	2.04099	0.584963	0.125	2.07708	-6.19443	0.75
	CD11c+HLA-DR+CD141+ DC (% Live Lymphocytes)	6.28333	15.3575	10.56	4.71665	42		CD11c+HLA-DR+CD141+ DC (% Live Lymphocytes)	0.5557	1.6575	3.91*	3.902	1.01*		CD11c+HLA-DR+CD141+ DC (% Live Lymphocytes)	0.993848	0.867603	0.75	0.0310876	3.06082		1	2.2136	3.49701	0.5	NA	NA	NA
	CD3+ (% Live Lymphocytes)	55.5376	50.0719	42.3344	37.114	46.6		CD3+ (% Live Lymphocytes)	16.4856	12.7622	13.5969	21.2006	13.76*		CD3+ (% Live Lymphocytes)	-0.218842	-0.286017	0.352875	-0.449224	0.0610756		0.786865	-0.78109	0.738237	0.903198	-0.264453	-0.117108	0.46875
	CD3+ Counts	45677.1	35456.8	20,071.04*	16,728.4*	26,375.17*		CD3+ Counts	13071.1	10037.9	4,078.05*	5,275.14*	1,547.9*		CD3+ Counts	-0.422824	-0.352592	0.32251	-1.09805	-1.01299		0.587891	-1.3977	-1.13387	1	-1.23708	-0.784515	0.46875
	CD3-CD11b+CD11c-	23.3792	14.8767	13.94*	20.062	19.5156		CD3-CD11b+CD11c-	16.58	21.202	28.4411	33.5186	7.94333		CD3-CD11b+CD11c-	-0.924518	-0.0297989	0.382812	-0.931997	0.30648		0.109375	-1.14302	0.455195	0.3125	-0.799226	-1.05966	0.5
	CD3-CD11b+CD40+	17.3718	21	25.2875	34.267	3.36*		CD3-CD11b+CD40+	5.479	6.0343	7.19636	1.62017	0.805		CD3-CD11b+CD40+	-0.9083	-0.0807512	0.8125	-0.263866	1.34156		0.3125	0.258131	-0.982998	0.875	-2.3	-1.39537	1
	CD3-CD11c+CD11b+	26.5933	33.8267	47.81*	48.68*	20.3089		CD3-CD11c+CD11b+	4.8957	6.4065	7.84878	2.69014	0.612833		CD3-CD11c+CD11b+	0.264056	0.755975	0.3125	0.987494	-0.292782		0.375	0.630723	-0.405256	0.0625	0.0519946	-2.67164	0.25
	CD3-CD11c+CD40+	15.4955	14.5708	28.07	34.143	4.17333		CD3-CD11c+CD40+	2.6031	1.72985	3.265	0.8715	0.05*		CD3-CD11c+CD40+	0.159256	-0.162898	0.078125	1.25911	0.310627		0.15625	0.273169	-1.76877	0.125	-1.99574	-11.2512	0.5
	CD4+ (% CD3+)	57.0897	61.8906	59.6046	62.28	53.27*		CD4+ (% CD3+)	39.4008	36.4876	46.0032	50.66*	32.94*		CD4+ (% CD3+)	0.0192628	0.117016	0.677704	-0.0142607	0.133989		1	-0.0340831	0.458594	0.6698	-0.381771	-0.385784	0.46875
	CD4+ (% Live Lymphocytes)	32.2638	31.075	26.65*	23.45*	23.95*		CD4+ (% Live Lymphocytes)	7.28529	5.61502	6.66164	11.2352	4.94945		CD4+ (% Live Lymphocytes)	-0.0758679	-0.521088	0.458572	-0.372333	0.0251535		0.587891	-0.625494	0.997158	0.714844	-0.647799	-0.528928	0.46875
	CD4+CD69+ (% Live Lymphocytes)	0.416241	1.11466	1.43565	0.79232	0.472056		CD4+CD69+ (% Live Lymphocytes)	1.50303	0.809882	2.24537	4.04*	1.96225		CD4+CD69+ (% Live Lymphocytes)	0.284241	-0.736966	0.108887	-0.0874628	1.32205		0.414307	0.0581387	1.72379	0.855225	0.589898	0.67287	0.6875
	CD4+CTLA4+ (% Live Lymphocytes)	3.35307	2.53028	1.62195	1.46356	0.412056		CD4+CTLA4+ (% Live Lymphocytes)	1.12093	0.55*	1.31503	1.97942	1.26174		CD4+CTLA4+ (% Live Lymphocytes)	-0.125396	-0.851262	0.352875	0.160465	0.584963		0.635498	0.77262	0.918389	0.714844	-0.0534576	1.11451	0.9375
	CD69+ (% CD4+)	1.34224	3.74375	5.84923	4.442	2.09556		CD69+ (% CD4+)	25.1496	26.2018	35.11*	33.7582	37.623		CD69+ (% CD4+)	0.238971	-0.221172	0.0505371	0.576501	0.353333		0.216309	1.05926	0.729734	0.172607	0.904546	0.51684	0.6875
	CD69+ (% CD8+)	5.15448	7.86062	12.6888	12.59*	8.63278		CD69+ (% CD8+)	46.461	45.1708	49.0318	60.3029	58.3075		CD69+ (% CD8+)	-0.202819	-0.0465426	0.352875	0.545532	0.0724531		0.010498047*	1.14496	0.435095	0.029541016*	0.472942	-0.129389	0.8125
	CD8+ (% CD3+)	28.2069	24.4794	23.27*	23.0796	28.556		CD8+ (% CD3+)	28.679	18.21*	17.07*	22.88	20.8415		CD8+ (% CD3+)	-0.162844	-0.504477	0.430679	-0.384552	-1.11548		0.946045	-0.33152	-0.387924	0.325806	-0.0533656	-0.347568	0.9375
	CD8+ (% Live Lymphocytes)	16.5121	12.65*	9.54*	8.76*	13.8486		CD8+ (% Live Lymphocytes)	5.41744	2.99*	2.45*	5.36312	3.9497		CD8+ (% Live Lymphocytes)	-0.423038	-1.05703	0.377823	-1.14728	-0.977929		0.839355	-0.961017	-0.401365	0.625732	-0.272508	-0.313417	1
	CD8+CD69+ (% Live Lymphocytes)	0.750276	0.950688	3.21857	1.26002	0.745634		CD8+CD69+ (% Live Lymphocytes)	2.42221	0.92*	0.950579	2.45318	2.2151		CD8+CD69+ (% Live Lymphocytes)	-0.134244	-1.51457	0.284164	0.347923	-1.9299		0.3396	0.156538	-0.216394	0.463135	-0.483307	0.0384741	0.6875
	CD8+GrnzB+ (% Live Lymphocytes)	5.6469	4.23175	3.50*	3.15*	5.77556		CD8+GrnzB+ (% Live Lymphocytes)	1.9597	1.07266	1.01513	1.83682	1.11987		CD8+GrnzB+ (% Live Lymphocytes)	-0.397617	-1.1592	0.206894	-0.878864	-1.58427		0.786865	-1.022	-0.7105	0.903	-0.6546	-0.6262	0.937
	CTLA-4+ (% CD8+)	13.695	13.4475	3.30167	7.809	1.02556		CTLA-4+ (% CD8+)	33.7283	19.8983	13.715	24.7156	15.1433		CTLA4+ (% CD8+)	0.734177	0.636652	0.501587	0.801009	-0.212729		0.570312	1.42381	-0.514573	0.97995	0.418133	-0.867289	0.1875
	GrzB+ (% CD4+)	4.07333	10.73	6.50*	5.454	3.10222		GrzB+ (% CD4+)	27.242	15.605	25.4	5.78714	22.54		GrzB+ (% CD4+)	-0.107328	-0.579925	0.148438	0.578977	0.528379		0.578125	0.066037	-1.60981	0.3125	0.763197	-0.811086	0.75
	IFNg+ (% CD4+)	0.315586	0.800594	0.749615	1.48332	0.38131		IFNg+ (% CD4+)	12.1226	11.7961	6.91121	2.36076	9.65*		IFNg+ (% CD4+)	0.734092	0.398549	0.547668	0.788496	0.749883		0.541748	0.850113	0	0.216553	-0.0893387	2.18128	0.8125
	Ki-67+ (% CD4+)	3.19075	13.358	10.7384	16.8236	1.93*		Ki-67+ (% CD4+)	11.7909	8.77713	5.27286	13.5556	6.25143		Ki67+ (% CD8+)	0.977974	0.0256734	0.454834	1.28481	0.483891		0.3125	2.2202	0.331924	0.232422	0.704544	0	1
	Ki-67+ (% CD8+)	2.24167	9.99744	11.61	16.19*	1.32444		Ki-67+ (% CD8+)	11.4124	8.70194	13.7402	17.5664	9.80143		Live	-0.0525596	-0.101656	0.945312	-0.0784792	-1.2492		0.375	-0.0565945	-0.867362	0.125	-0.0325211	-0.248454	0.25
	Ki67+ (% CD8+)	15.5958	4.96867	1.97*	2.765	4.53222		Ki67+ (% CD8+)	39.7756	36.0408	3.152	8.29889	13.34		Live Lymphocytes Count	-0.03299	-1.74236	0.460938	-1.04336	-2.61232		0.8125	-0.371266	-1.9857	1	-1.19285	-2.81293	1
	Live	91.425	86.175	82.65*	89.69	90.0778		Live	64.35	57.565	47.26	48.4571	58.7333		PD1+ (% CD8+)	0.795062	0.464827	0.855225	1.71161	0.159508		1	1.63577	-0.0144996	0.267578	1.12381	-1.89251	0.3125
	Live Lymphocytes Count	106135	86925.3	54,876.75*	78750.9	57849.3		Live Lymphocytes Count	79998.9	14412.1	35872.7	21587	7990.83		PD1+ (% CD4+)	0.734177	0.636652	0.855225	0.801009	-0.212729		0.460938	1.42381	-0.514573	0.0494384*	0.418133	-0.867289	0.3125
	PD-1+ (% CD8+)	1.80744	5.9225	2.079	2.738	3.20867		PD-1+ (% CD8+)	51.6522	44.365	16.70*	21.4911	2.22		*P<0.05 using a Wilcoxon rank sum test
	PD-1+ (% CD4+)	1.8125	5.88	0.989091	4.49*	5.13667		PD-1+ (% CD4+)	41.9294	44.8175	18.33*	24.0633	11.036			Week 1			Week 3				Week 5			Week 12
															TCR Variables	Blood	Tumor	P	Blood	Tumor		P	Blood	Tumor	P	Blood	Tumor	P
	TCR Variables														Outofframe Rearrangements	-0.468136	-0.755978	0.599487	-1.38007	-1.00749		0.216553	-1.53187	-1.24882	0.129395	-0.757175	-0.246891	0.5
															Outofframe Templates	-0.453896	-0.791634	0.599487	-1.37815	-1.09266		0.541626	-1.5514	-1.48979	0.380371	0.0261119	-0.240053	0.5
	outofframe_rearrangements_T1	6352.65	4,303.87*	2,799.65*	2389*	2491.67			932.117	518.34*	506.59*	460.88*	272.167		Productive Clonality	-0.0329936	-0.512107	0.241211	0.0847846	-0.965512		0.008544922*	0.0406106	-0.528232	0.009277344*	1.28988	-0.670571	1
	outofframe_templates_T1	9163.6	6,454.26*	4,104.45*	3,799.3*	4557.83			1467.37	819.55*	854.667	623.04*	556.5		Productive Entropy	-0.0363528	-0.103521	0.25238	-0.158658	-0.182758		0.541626	-0.144951	-0.160381	0.034179688*	-0.271637	-0.159573	1
	productive_clonality_T1	0.0672234	0.0744567	0.0867692	0.0872424	0.117973			0.0724681	0.05*	0.04*	0.04*	0.0418628		Productive Rearrangements	-0.436338	-0.868141	0.524475	-1.47318	-1.25257		0.390991	-1.65198	-1.28232	0.129395	-0.871969	-0.823273	0.5
	productive_entropy_T1	13.5266	12.9381	12.24*	11.94*	10.8662			10.4752	9.63*	9.48*	9.99*	8.14286		Productive Templates	-0.504159	-1.00558	0.561401	-1.4277	-1.16197		0.625732	-1.83814	-1.70997	0.423828	-0.00453111	-1.02944	0.5
	productive_rearrangements_T1	31111.3	20,271.13*	12,567.8*	10,827*	11463.6			4147.15	2,247.43*	2,074.04*	1,980.69*	1268.17		Sample Entropy	-0.0530249	-0.0998135	0.330261	-0.152552	-0.158423		0.501587	-0.142539	-0.143406	0.0522461	-0.260718	-0.106807	1
	productive_templates_T1	44694.8	30,424.35*	18,906.95*	17,366*	22514.8			7085.47	3,784.74*	3,536.65*	2,766.24*	2209		Total Rearrangements	-0.441534	-0.837236	0.599487	-1.45526	-1.20126		0.295776	-1.62785	-1.28427	0.129395	-0.850906	-0.619819	0.5
	sample_entropy_T1	13.7958	13.21*	12.57*	12.23*	12.14*			10.8563	10.02*	9.86*	10.35*	8.68403		Total Templates	-0.446106	-0.976499	0.561401	-1.44819	-1.07719		0.625732	-1.81847	-1.65511	0.423828	0.0315092	-0.783888	0.5
	total_rearrangements_T1	38034.3	24,959.22*	15,618.8*	13,432.95*	14176.4			5161.97	2,814.09*	2,625.98*	2,482.65*	1564.33		*P<0.05 using a Wilcoxon rank sum test
	total_templates_T1	54682	37,448.43*	23,372.15*	21,492.1*	27433.5			8667.03	4,670.94*	4,459.43*	3441.98	2801.5
															Clone Groupings
	Clone Groupings
	Median Counts at Different Time Points
	HPV-PMA-CTRL+	4	2	0+	1	1.5			0	0	1	1+	2.5
	HPV-PMA+CTRL+	1	0	0	0	0			0	0	0	0+	0
	HPV+PMA-CTRL-	6	3+	1.5+	1+	3			0	1	2	2+	4
	HPV+PMA-CTRL+	1	1	0	0+	0			0	0	0+	0+	1
	HPV+PMA+CTRL-	1	1	0	0.5	0			0	0	0	0+	1
	HPV+PMAP+CTRL+	0	0	0	0	0			0	0	0	0	0
	HPV-PMA+CTRL-	34	20+	13.5+	12.5+	13			4	1+	2+	1+	0.5
	.+Paired Wilcoxon test
