# Supplementary material for: Candidate HPV-Specific T-Cells Expand in the Tumor Microenvironment During Chemoradiotherapy
Source: Research Square preprint supplement (doi:10.21203/rs.3.rs-105933/v1), 2021-03-16
Supplement: Supplementary file 3 [file 46f37311c74edf6752486ed5.xlsx]

## Sheet: Sheet1
				Baseline							Week 1							Week 3							Week 5							Follow-up
				OS			RFS				OS			RFS				OS			RFS				OS			RFS				OS			RFS
				HR	95% CI	P	HR	95% CI	P		HR	95% CI	P	HR	95% CI	P		HR	95% CI	P	HR	95% CI	P		HR	95% CI	P	HR	95% CI	P		HR	95% CI	P	HR	95% CI	P
	Blood Samples	Counts	QSRANV	1.17201	(0.628572144-2.185279065)	0.617558	1.2634	(0.905048037120254-1.76363011813327)	0.169516		30412.3	(-Inf - +Inf)	0.999062	1.03538	(0.688400098885055-1.55725053234271)	0.867403		1.21495e-08	(-Inf - +Inf)	0.998867	0.858566	(0.535392956268191-1.3768114165897)	0.526821		0.000145173	(-Inf - +Inf)	0.999084	0.819677	(0.581299160763166-1.15580709212436)	0.256749		1.13992e-08	(-Inf - +Inf)	0.998898	1.38122	(0.809395480760393-2.35704566742584)	0.236238
			PIW	511943	(-Inf - +Inf)	0.999942	2.40515	(0.92691688187645-6.24086716826975)	0.0712366		3	(0.272029829886213- 33.08460694)	0.369712	5.81312	(1.13452825934271-29.7853879497493)	0.0347406		9.24016e-09	(-Inf - +Inf)	0.999551	1.05572	(0.220557554503078-5.05335247263654)	0.945883		1.73713e-09	(-Inf - +Inf)	0.999526	0.352081	(0.0438245106166197-2.82858162659346)	0.32614		6.52445e-09	(-Inf - +Inf)	0.999351	1.38906	(0.561989864471104-3.43332193617057)	0.476594
			GTFR	1.63299	(0.190081066885512-14.0291019528082)	0.654934	1.26533	(0.490693883406819-3.26284344302159)	0.626316		7.45001e-09	(-Inf - +Inf)	0.999424	0.633892	(0.171423733141653-2.34400798200218)	0.494454		4.28549e-09	(-Inf - +Inf)	0.999571	7.22117	(0.990506072619133-52.6451271742209)	0.0511103		1.02036e-08	(-Inf - +Inf)	0.999553	2.06355e-08	(-Inf - +Inf)	0.99886		NA	(NA-NA)	NA	NA	(NA-NA)	NA
			KTYG	2.21087	(0.546238979830052-8.9483422171856)	0.266035	1.41693	(0.905875927211269-2.21628728560322)	0.126797		0.950721	(0.308345744967297-2.93135501035817)	0.929907	0.822121	(0.477352826177226-1.41589940063721)	0.480087		3.10642e-08	(-Inf - +Inf)	0.999081	1.09504	(0.650353597403017-1.84378886646422)	0.732703		2.56779e-08	(-Inf - +Inf)	0.999088	1.02525	(0.604324611594388-1.73937600831943)	0.926316		1.4212e-08	(-Inf - +Inf)	0.999008	1.00702	(0.573965187188048-1.76680029198098)	0.980553
			RHH	3.43695e-09	(-Inf - +Inf)	0.999592	1.13435	(0.299891419751974-4.29071925759603)	0.852669		2.92399e-09	(-Inf - +Inf)	0.999481	0.976364	(0.266714496284158-3.57418543559158)	0.97118		1.02036e-08	(-Inf - +Inf)	0.999553	1.05528	(0.24564706876631-4.5334200791616)	0.942323		6.05192e-05	(-Inf - +Inf)	0.999486	5.99346e-05	(-Inf - +Inf)	0.998857		1.28343e-08	(-Inf - +Inf)	0.999481	1.66203	(0.660033076703511-4.18514430571797)	0.280937
		Fold changes	QSRANV	-	-	-	-	-	-		0.992483	(0.920500079447442-1.07009510210913)	0.844286	0.978119	(0.94100186167319-1.0166992575053)	0.262329		0.424262	(0.00556512757493928-32.343931549221)	0.698194	0.996408	(0.963126721017071-1.03083852604934)	0.835515		0.840681	(0.387170545879203-1.82540733246282)	0.660884	0.963195	(0.922125180531502-1.00609439169644)	0.0916656		0.848049	(0.344193012881376-2.08948993718899)	0.720167	0.995247	(0.966465431168798-1.02488650640365)	0.750351
			PIW	-	-	-	-	-	-		0.985596	(0.87982362300654-1.10408531064017)	0.802217	1.01552	(0.963757322701125-1.07006566740799)	0.563937		2.2873e-05	(-Inf - +Inf)	0.995986	0.9859	(0.941250484619662-1.03266809141041)	0.54816		3.32454e-05	(-Inf - +Inf)	0.996316	0.961814	(0.918102578792724-1.00760727036774)	0.100877		0.547464	(-Inf - +Inf)	0.999501	0.990648	(0.944380868322111-1.03918242169175)	0.700226
			GTFR	-	-	-	-	-	-		0.856253	(0.50344529962169-1.45630479923524)	0.566837	0.974256	(0.934050149443871-1.01619318012431)	0.225162		0.875291	(0.562792290673145-1.36130999805516)	0.554442	1.00624	(0.953945602118259-1.06140910216849)	0.819202		0.875786	(0.563779117968862-1.36046521621306)	0.555062	0.947078	(0.891687137178764-1.00590874617943)	0.0769999		0.885166	(0.589305891932336-1.32956291116702)	0.556763	0.972458	(0.926288794359311-1.02092774007481)	0.260426
			KTYG	-	-	-	-	-	-		0.980213	(0.897994395312074-1.06995950717924)	0.654788	0.978487	(0.933573041764765-1.02556160616808)	0.364332		1.44925e-08	(-Inf - +Inf)	0.980598	0.992209	(0.960591339991243-1.02486781571886)	0.635963		4.98945e-08	(-Inf - +Inf)	0.979846	0.966292	(0.921248145045269-1.01353814692218)	0.159177		0.116389	(0.000298666662980359-45.3560480724148)	0.479773	0.992577	(0.9665528886496-1.01930133610724)	0.582553
			RHH	-	-	-	-	-	-		0.985026	(0.890065858214365-1.09011773917575)	0.770519	0.998604	(0.950848984097048-1.04875776833053)	0.955447		1.009	(0.902596785476369-1.12795655695901)	0.87473	1.02331	(0.96234870479422-1.08812469147274)	0.462207		0.999759	(0.925169271495615-1.0803629408236)	0.995144	0.990311	(0.956636758765237-1.02517146856045)	0.581245		0.999809	(0.925088064626314-1.08056427765335)	0.996145	1.01047	(0.97688222480509-1.04522147525067)	0.545808
	Tumor Samples	Counts	QSRANV	1.1478	(0.839675698411032-1.56899073332009)	0.387412	1.08742	(0.873002276069452-1.35450337026515)	0.454509		1.02712	(0.771808204947952-1.36689478404508)	0.854378	1.03821	(0.868171402610849-1.24154038609058)	0.681177		1.07689	(0.787977161200531-1.47173318657468)	0.642069	1.02879	(0.845716578866732-1.25150365813309)	0.776465		1.16596	(0.861831086006498-1.57742146326128)	0.31939	1.19933	(0.999204878588387-1.43954696089859)	0.0510066		-	-	-	-	-	-
			PIW	0.814132	(0.30256773529965-2.19062107281842)	0.683877	0.517767	(0.189684232963544-1.41330774175428)	0.198876		1.51269e-08	(-Inf - +Inf)	0.998669	0.58728	(0.08882422605108-3.88292658133591)	0.580747		1.02462	(0.459785539923153-2.28335731536305)	0.952555	1.02291	(0.623453029496966-1.67830994341638)	0.92855		1.09161	(0.473370528772819-2.51730007759575)	0.837089	1.1076	(0.667661496082445-1.8374280016336)	0.692312		-	-	-	-	-	-
			GTFR	0.724071	(0.161055407016233-3.25526761940319)	0.673763	1.218	(0.681222840705341-2.17774955515096)	0.505926		8.02335e-09	(-Inf - +Inf)	0.998997	0.621468	(0.103352438209976-3.73694968654578)	0.603278		2.86375e-08	(-Inf - +Inf)	0.998769	0.822414	(0.446225337729298-1.51574651945223)	0.530836		1.19037e-08	(-Inf - +Inf)	0.998777	0.854463	(0.487520242246308-1.49759239550836)	0.582759		-	-	-	-	-	-
			KTYG	1.04125	(0.653317215483186-1.65953054616288)	0.865036	0.970261	(0.706622901632092-1.33226213656888)	0.851959		0.718	(0.38844834841119-1.32713706229455)	0.290525	0.857124	(0.616128785654676-1.19238188989793)	0.360019		1.31913	(0.85981112537038-2.02381155590581)	0.204688	1.05339	(0.801524737919085-1.38440205022945)	0.709087		1.05447	(0.660301341059616-1.68393558424204)	0.824257	1.16459	(0.890443487074408-1.52314845189237)	0.265859		-	-	-	-	-	-
			RHH	0.772618	(0.232293245481242-2.56976548567856)	0.673961	0.854596	(0.485916613881052-1.50300253589057)	0.585436		1.10038	(0.484408085391096-2.4996060484998)	0.819261	0.990445	(0.542014295472423-1.80988053652674)	0.975099		3.09679e-08	(-Inf - +Inf)	0.998707	0.952124	(0.614362002904246-1.47558008585874)	0.826278		1.25082e-08	(-Inf - +Inf)	0.998613	1.02721	(0.469799080453549-2.24598419781831)	0.946373		-	-	-	-	-	-
		Fold changes	QSRANV	-	-	-	-	-	-		0.997134	(0.942759267410814-1.05464449746934)	0.920086	1.00515	(0.967221773641391-1.0445609008449)	0.793592		1.02708	(0.972321135870115-1.0849183524228)	0.339168	1.0163	(0.983424584589998-1.05028118892783)	0.335139		1.0257	(0.964735417023071-1.09051109545083)	0.417027	1.02722	(0.990344885583258-1.0654613601785)	0.149932		-	-	-	-	-	-
			PIW	-	-	-	-	-	-		1.00052	(0.955386408805748-1.0477817860992)	0.982452	1.01309	(0.987217187875951-1.03964388348677)	0.32446		1.00774	(0.973512585550922-1.04316369531673)	0.661983	1.01614	(0.994102378242062-1.03865895045395)	0.152391		1.03326	(0.989440939728079-1.07902132376447)	0.138912	1.04019	(1.01071061546011-1.07053623016584)	0.00722748676652824*		-	-	-	-	-	-
			GTFR	-	-	-	-	-	-		0.988548	(0.945280899628596-1.03379560221536)	0.613973	0.982256	(0.955628728209926-1.00962606427512)	0.201688		0.989842	(0.944691721420931-1.03714914365589)	0.668177	0.982511	(0.956283529778858-1.00945882135447)	0.201243		0.98443	(0.941326718933796-1.02950773970291)	0.492125	0.976075	(0.95082214043167-1.00199902935978)	0.0701962		-	-	-	-	-	-
			KTYG	-	-	-	-	-	-		1.03574	(0.988032119570731-1.08576085145568)	0.144404	1.01007	(0.978688466626503-1.0424541067409)	0.533848		1.01	(0.971420019184162-1.05011131406501)	0.616563	1.00416	(0.979682977441646-1.02924145098292)	0.741789		1.04505	(1.00095226524447-1.09108657961113)	0.0451519328486005*	1.02033	(0.990540254498952-1.0510203041169)	0.183088		-	-	-	-	-	-
			RHH	-	-	-	-	-	-		1.00496	(0.949378344092306-1.06378902006212)	0.86474	1.00737	(0.970899482623924-1.04520342212563)	0.69643		0.977977	(0.92749090473729-1.03121164603162)	0.410245	1.01208	(0.972575720496552-1.05319230600135)	0.554418		0.981441	(0.936208914052899-1.02885776356421)	0.436456	1.00718	(0.975069815524409-1.04034992305969)	0.665138		-	-	-	-	-	-
		*Significant p-value
