# Supplementary material for: Candidate HPV-Specific T-Cells Expand in the Tumor Microenvironment During Chemoradiotherapy
Source: Research Square preprint supplement (doi:10.21203/rs.3.rs-105933/v1), 2021-03-16
Supplement: Supplementary file 6 [file 9c062e149946eeb39151cd90.xlsx]

## Sheet: Sheet1
E6 1-32	mhqkrtamfq dpqerprklp qlctelqtti hd
E6 19-50	lp qlctelqtti hdiilecvyc kqqllrrevy
E6 41-65	kqqllrrevy dfafrdlciv yrdgn
E6 55-80	rdlciv yrdgnpyavc dkclkfyski
E6 71-95	dkclkfyski seyrhycysl ygttl
E6 85-109	ygttleqqyn kplcdllirc incqkplcpe ek
E6 91-122	ygttleqqyn kplcdllirc incqkplcpe ek
E6 109-140	rc incqkplcpe ekqrhldkkq rfhnirgrwt
E6 127-158	dkkq rfhnirgrwt grcmsccrss rtrretql
E7 1-35	mhgdtptlhe ymldlqpett dlycyeqlnd sseee
E7 22-56	lycyeqlnd sseeedeidg pagqaepdra hynivt
E7 43-77	gqaepdra hynivtfcck cdstlrlcvq sthvdic
E7 64-98	tlrlcvq sthvdictle dllmgtlgiv cpicsqkp
