# Supplementary material for: Candidate HPV-Specific T-Cells Expand in the Tumor Microenvironment During Chemoradiotherapy
Source: Research Square preprint supplement (doi:10.21203/rs.3.rs-105933/v1), 2021-03-16
Supplement: Supplementary file 7 [file 1aaa8c445b124360627d7769.xlsx]

## Sheet: Blood 
	T1		T2		T3		T4		T5
Study ID	TCR	Flow	TCR	Flow	TCR	Flow	TCR	Flow	TCR	Flow
304	✓	✓	✓	✓	✓	✓	✓	✓	✓	✓
305		✓		✓		✓	✓	✓	✓	✓
306	✓	✓	✓	✓	✓	✓	✓	✓	✓	✓
307	✓	✓	✓	✓	✓	✓	✓	✓
308	✓	✓	✓	✓	✓	✓	✓	✓
309	✓	✓	✓	✓	✓	✓	✓	✓
310		✓	✓	✓				✓
311	✓	✓	✓	✓	✓	✓	✓	✓
312	✓	✓		✓	✓	✓	✓	✓	✓	✓
314	✓	✓	✓	✓	✓	✓	✓	✓
315			✓	✓	✓	✓	✓	✓	✓	✓
316			✓	✓	✓	✓			✓	✓
317	✓	✓	✓	✓			✓	✓
319									✓	✓
321	✓	✓	✓	✓	✓	✓	✓	✓
322		✓	✓	✓	✓	✓	✓	✓	✓	✓
324	✓	✓	✓	✓	✓	✓	✓	✓
325	✓	✓	✓	✓	✓	✓
326	✓	✓	✓	✓	✓	✓
327	✓	✓	✓	✓	✓	✓	✓	✓
329	✓	✓	✓	✓		✓	✓	✓	✓	✓
330	✓	✓	✓	✓	✓	✓	✓	✓	✓	✓
332	✓		✓		✓		✓		✓
333	✓	✓	✓	✓	✓	✓	✓	✓	✓	✓
340				✓
341	✓
351	✓	✓	✓	✓	✓	✓	✓	✓
354	✓	✓	✓
362		✓		✓		✓		✓
365		✓		✓		✓		✓
369		✓		✓		✓		✓
370				✓		✓
371		✓		✓		✓
373
374						✓		✓
381				✓
383		✓		✓
384
385		✓		✓
386		✓		✓
387		✓
388

## Sheet: Tumor
	T1		T2		T3		T4		T5
Study ID	TCR	Flow	TCR	Flow	TCR	Flow	TCR	Flow	TCR	Flow
1	✓		✓		✓				✓
2	✓		✓		✓		✓
3	✓		✓		✓		✓
4	✓		✓		✓		✓
5	✓		✓		✓		✓
7	✓		✓		✓		✓
8	✓		✓		✓		✓
9	✓		✓				✓
12	✓	✓	✓	✓	✓	✓	✓	✓
13	✓	✓	✓	✓	✓	✓	✓	✓
14	✓	✓	✓	✓	✓	✓	✓	✓
15	✓	✓	✓	✓	✓	✓	✓	✓
16	✓	✓	✓	✓	✓	✓	✓	✓
17	✓	✓	✓	✓	✓	✓	✓	✓
18	✓		✓		✓		✓
19	✓		✓
20	✓	✓	✓	✓	✓	✓	✓	✓
22	✓	✓	✓	✓	✓	✓	✓	✓
23	✓	✓	✓	✓			✓	✓
24	✓	✓	✓	✓	✓	✓	✓	✓
25	✓				✓		✓
26	✓				✓		✓
27	✓	✓					✓	✓
28	✓		✓		✓		✓
29	✓		✓		✓		✓
30	✓				✓		✓
301	✓	✓	✓	✓	✓	✓	✓	✓	✓	✓
302	✓	✓	✓		✓	✓				✓
303	✓	✓	✓	✓	✓	✓	✓	✓	✓	✓
304	✓	✓	✓	✓	✓	✓	✓	✓	✓	✓
305	✓	✓	✓	✓	✓	✓	✓	✓		✓
306	✓	✓	✓	✓	✓	✓	✓	✓	✓	✓
307	✓	✓	✓	✓	✓	✓
308	✓	✓	✓	✓	✓	✓
309	✓	✓	✓	✓
310	✓	✓	✓	✓			✓	✓		✓
311	✓	✓	✓	✓	✓	✓	✓	✓	✓	✓
312	✓	✓	✓		✓	✓	✓	✓		✓
313	✓		✓		✓		✓
314	✓	✓	✓	✓	✓	✓	✓	✓
315	✓	✓	✓	✓	✓	✓				✓
316	✓	✓	✓	✓	✓	✓	✓	✓		✓
317	✓	✓					✓	✓
318	✓		✓		✓		✓
319	✓	✓	✓	✓	✓	✓	✓	✓
320	✓		✓				✓
321	✓	✓	✓	✓	✓	✓	✓	✓
322	✓	✓	✓	✓	✓	✓	✓	✓		✓
323	✓		✓		✓		✓			✓
324	✓	✓	✓	✓	✓	✓	✓	✓
325	✓	✓	✓	✓	✓	✓	✓	✓
326	✓	✓	✓	✓	✓	✓
327	✓	✓	✓	✓	✓	✓	✓	✓
328	✓	✓			✓		✓	✓
329	✓	✓	✓	✓	✓	✓	✓	✓		✓
330	✓	✓	✓	✓	✓	✓	✓	✓		✓
332	✓		✓		✓		✓
333	✓		✓		✓		✓
334	✓	✓
335		✓						✓
337		✓						✓		✓
338		✓		✓		✓		✓
340		✓		✓		✓
351		✓		✓		✓		✓
354		✓
359		✓		✓		✓		✓
362	✓		✓	✓	✓	✓	✓	✓
363		✓		✓		✓		✓
364		✓		✓		✓		✓		✓
365		✓		✓		✓		✓
368		✓						✓		✓
369		✓		✓						✓
370		✓		✓
371		✓		✓		✓		✓
373		✓						✓
374		✓		✓				✓
376		✓		✓		✓		✓
381		✓		✓		✓
382		✓
383		✓						✓
384		✓
385		✓		✓
386		✓
387		✓
388		✓
