# Supplementary material for: Candidate HPV-Specific T-Cells Expand in the Tumor Microenvironment During Chemoradiotherapy
Source: Research Square preprint supplement (doi:10.21203/rs.3.rs-105933/v1), 2021-03-16
Supplement: Supplementary file 8 [file 2f8b2908adf5f20fc9857b72.csv]

	CDR3.aa	annotatedinmcpas	annotatedintba	annotatedinvdj	CDR3.alpha.aa.x	Species.x	Category.x	Pathology.x	Pathology.Mesh.ID	Additional.study.details	Antigen.identification.method	NGS	Antigen.protein	Protein.ID	Epitope.peptide	Epitope.ID	MHC	Tissue	T.Cell.Type	T.cell.characteristics	CDR3.alpha.nt.x	TRAV	TRAJ	TRBV	TRBD	TRBJ	Reconstructed.J.annotation	CDR3.beta.nt.x	Mouse.strain	PubMed.ID	Remarks	Chain.x	gene	species	antigen.epitope	antigen.gene	antigen.species	complex.id	v.segm	j.segm	v.end	j.start	mhc.a	mhc.b	mhc.class	reference.id	vdjdb.score	Species.y	Chain.y
1	CASGLASTDTQYF	NA	1	NA	NA	NA	NA	NA	NA	NA	NA	NA	NA	NA	NA	NA	NA	NA	NA	NA	NA	NA	NA	NA	NA	NA	NA	NA	NA	NA	NA	NA	NA	NA	NA	NA	NA	NA	NA	NA	NA	NA	NA	NA	NA	NA	NA	NA	NA
2	CASGSSYNEQFF	NA	1	NA	NA	NA	NA	NA	NA	NA	NA	NA	NA	NA	NA	NA	NA	NA	NA	NA	NA	NA	NA	NA	NA	NA	NA	NA	NA	NA	NA	NA	NA	NA	NA	NA	NA	NA	NA	NA	NA	NA	NA	NA	NA	NA	NA	NA	NA
3	CASRAQETQYF	NA	1	NA	NA	NA	NA	NA	NA	NA	NA	NA	NA	NA	NA	NA	NA	NA	NA	NA	NA	NA	NA	NA	NA	NA	NA	NA	NA	NA	NA	NA	NA	NA	NA	NA	NA	NA	NA	NA	NA	NA	NA	NA	NA	NA	NA	NA	NA
4	CASRPSGSSYEQYF	NA	1	NA	NA	NA	NA	NA	NA	NA	NA	NA	NA	NA	NA	NA	NA	NA	NA	NA	NA	NA	NA	NA	NA	NA	NA	NA	NA	NA	NA	NA	NA	NA	NA	NA	NA	NA	NA	NA	NA	NA	NA	NA	NA	NA	NA	NA	NA
5	CASRQGATYEQYF	NA	NA	1	NA	NA	NA	NA	NA	NA	NA	NA	NA	NA	NA	NA	NA	NA	NA	NA	NA	NA	NA	NA	NA	NA	NA	NA	NA	NA	NA	NA	TRB	HomoSapiens	KLGGALQAK	IE1	CMV	16688	TRBV5-1	TRBJ2-7	3	8	HLA-A*03:01	B2M	MHCI	https://www.10xgenomics.com/resources/application-notes/a-new-way-of-exploring-immunity-linking-highly-multiplexed-antigen-recognition-to-immune-repertoire-and-phenotype/#	0	HomoSapiens	TRB
6	CASRSGTGNEKLFF	NA	1	NA	NA	NA	NA	NA	NA	NA	NA	NA	NA	NA	NA	NA	NA	NA	NA	NA	NA	NA	NA	NA	NA	NA	NA	NA	NA	NA	NA	NA	NA	NA	NA	NA	NA	NA	NA	NA	NA	NA	NA	NA	NA	NA	NA	NA	NA
7	CASSAQMNTEAFF	NA	1	NA	NA	NA	NA	NA	NA	NA	NA	NA	NA	NA	NA	NA	NA	NA	NA	NA	NA	NA	NA	NA	NA	NA	NA	NA	NA	NA	NA	NA	NA	NA	NA	NA	NA	NA	NA	NA	NA	NA	NA	NA	NA	NA	NA	NA	NA
8	CASSELAGGPDTQYF	NA	NA	1	NA	NA	NA	NA	NA	NA	NA	NA	NA	NA	NA	NA	NA	NA	NA	NA	NA	NA	NA	NA	NA	NA	NA	NA	NA	NA	NA	NA	TRB	HomoSapiens	KLGGALQAK	IE1	CMV	4904	TRBV6-1	TRBJ2-3	5	10	HLA-A*03:01	B2M	MHCI	https://www.10xgenomics.com/resources/application-notes/a-new-way-of-exploring-immunity-linking-highly-multiplexed-antigen-recognition-to-immune-repertoire-and-phenotype/#	0	HomoSapiens	TRB
9	CASSELENTEAFF	NA	1	NA	NA	NA	NA	NA	NA	NA	NA	NA	NA	NA	NA	NA	NA	NA	NA	NA	NA	NA	NA	NA	NA	NA	NA	NA	NA	NA	NA	NA	NA	NA	NA	NA	NA	NA	NA	NA	NA	NA	NA	NA	NA	NA	NA	NA	NA
10	CASSGTGDTGELFF	NA	1	1	NA	NA	NA	NA	NA	NA	NA	NA	NA	NA	NA	NA	NA	NA	NA	NA	NA	NA	NA	NA	NA	NA	NA	NA	NA	NA	NA	NA	TRB	HomoSapiens	NLVPMVATV	pp65	CMV	0	TRBV6-4	TRBJ2-2	4	8	HLA-A*02	B2M	MHCI	PMID:28423320	0	HomoSapiens	TRB
11	CASSGTSGSTDTQYF	NA	1	NA	NA	NA	NA	NA	NA	NA	NA	NA	NA	NA	NA	NA	NA	NA	NA	NA	NA	NA	NA	NA	NA	NA	NA	NA	NA	NA	NA	NA	NA	NA	NA	NA	NA	NA	NA	NA	NA	NA	NA	NA	NA	NA	NA	NA	NA
12	CASSHGQGREQYF	NA	NA	1	NA	NA	NA	NA	NA	NA	NA	NA	NA	NA	NA	NA	NA	NA	NA	NA	NA	NA	NA	NA	NA	NA	NA	NA	NA	NA	NA	NA	TRB	HomoSapiens	KLGGALQAK	IE1	CMV	3235	TRBV7-3	TRBJ2-7	4	9	HLA-A*03:01	B2M	MHCI	https://www.10xgenomics.com/resources/application-notes/a-new-way-of-exploring-immunity-linking-highly-multiplexed-antigen-recognition-to-immune-repertoire-and-phenotype/#	0	HomoSapiens	TRB
13	CASSLAAAYEQYF	NA	1	NA	NA	NA	NA	NA	NA	NA	NA	NA	NA	NA	NA	NA	NA	NA	NA	NA	NA	NA	NA	NA	NA	NA	NA	NA	NA	NA	NA	NA	NA	NA	NA	NA	NA	NA	NA	NA	NA	NA	NA	NA	NA	NA	NA	NA	NA
14	CASSLDRGNTEAFF	NA	1	NA	NA	NA	NA	NA	NA	NA	NA	NA	NA	NA	NA	NA	NA	NA	NA	NA	NA	NA	NA	NA	NA	NA	NA	NA	NA	NA	NA	NA	NA	NA	NA	NA	NA	NA	NA	NA	NA	NA	NA	NA	NA	NA	NA	NA	NA
15	CASSLGDQPQHF	NA	1	1	NA	NA	NA	NA	NA	NA	NA	NA	NA	NA	NA	NA	NA	NA	NA	NA	NA	NA	NA	NA	NA	NA	NA	NA	NA	NA	NA	NA	TRB	HomoSapiens	GILGFVFTL	M	InfluenzaA	0	TRBV6-5	TRBJ1-5	4	7	HLA-A*02	B2M	MHCI	PMID:28423320	0	HomoSapiens	TRB
16	CASSLGDQPQHF	NA	1	1	NA	NA	NA	NA	NA	NA	NA	NA	NA	NA	NA	NA	NA	NA	NA	NA	NA	NA	NA	NA	NA	NA	NA	NA	NA	NA	NA	NA	TRB	HomoSapiens	GILGFVFTL	M	InfluenzaA	0	TRBV6-5	TRBJ1-5	4	7	HLA-A*02	B2M	MHCI	PMID:28423320	0	HomoSapiens	TRB
17	CASSLGDQPQHF	NA	1	1	NA	NA	NA	NA	NA	NA	NA	NA	NA	NA	NA	NA	NA	NA	NA	NA	NA	NA	NA	NA	NA	NA	NA	NA	NA	NA	NA	NA	TRB	HomoSapiens	GILGFVFTL	M	InfluenzaA	0	TRBV6-5	TRBJ1-5	4	7	HLA-A*02	B2M	MHCI	PMID:28423320	0	HomoSapiens	TRB
18	CASSLGDQPQHF	NA	1	1	NA	NA	NA	NA	NA	NA	NA	NA	NA	NA	NA	NA	NA	NA	NA	NA	NA	NA	NA	NA	NA	NA	NA	NA	NA	NA	NA	NA	TRB	HomoSapiens	NLVPMVATV	pp65	CMV	0	TRBV7-9	TRBJ1-5	5	7	HLA-A*02	B2M	MHCI	PMID:28423320	0	HomoSapiens	TRB
19	CASSLGDQPQHF	NA	1	1	NA	NA	NA	NA	NA	NA	NA	NA	NA	NA	NA	NA	NA	NA	NA	NA	NA	NA	NA	NA	NA	NA	NA	NA	NA	NA	NA	NA	TRB	HomoSapiens	NLVPMVATV	pp65	CMV	0	TRBV7-9	TRBJ1-5	5	7	HLA-A*02	B2M	MHCI	PMID:28423320	0	HomoSapiens	TRB
20	CASSLGDQPQHF	NA	1	1	NA	NA	NA	NA	NA	NA	NA	NA	NA	NA	NA	NA	NA	NA	NA	NA	NA	NA	NA	NA	NA	NA	NA	NA	NA	NA	NA	NA	TRB	HomoSapiens	NLVPMVATV	pp65	CMV	0	TRBV7-9	TRBJ1-5	5	7	HLA-A*02	B2M	MHCI	PMID:28423320	0	HomoSapiens	TRB
21	CASSLGGGTDTQYF	NA	1	NA	NA	NA	NA	NA	NA	NA	NA	NA	NA	NA	NA	NA	NA	NA	NA	NA	NA	NA	NA	NA	NA	NA	NA	NA	NA	NA	NA	NA	NA	NA	NA	NA	NA	NA	NA	NA	NA	NA	NA	NA	NA	NA	NA	NA	NA
22	CASSLGGYGYTF	NA	1	1	NA	NA	NA	NA	NA	NA	NA	NA	NA	NA	NA	NA	NA	NA	NA	NA	NA	NA	NA	NA	NA	NA	NA	NA	NA	NA	NA	NA	TRB	HomoSapiens	KLGGALQAK	IE1	CMV	1143913222	TRBV9	TRBJ1-2	4	7	HLA-A*03:01	B2M	MHCI	https://www.10xgenomics.com/resources/application-notes/a-new-way-of-exploring-immunity-linking-highly-multiplexed-antigen-recognition-to-immune-repertoire-and-phenotype/#	0	HomoSapiens	TRB
23	CASSLGQGYEQYF	NA	NA	1	NA	NA	NA	NA	NA	NA	NA	NA	NA	NA	NA	NA	NA	NA	NA	NA	NA	NA	NA	NA	NA	NA	NA	NA	NA	NA	NA	NA	TRB	HomoSapiens	GTSGSPIINR	NS3	DENV3/4	0	TRBV11-2	TRBJ2-7	5	9	HLA-A*11:01	B2M	MHCI	PMID:28945243	1	HomoSapiens	TRB
24	CASSLGQGYEQYF	NA	NA	1	NA	NA	NA	NA	NA	NA	NA	NA	NA	NA	NA	NA	NA	NA	NA	NA	NA	NA	NA	NA	NA	NA	NA	NA	NA	NA	NA	NA	TRB	HomoSapiens	KLGGALQAK	IE1	CMV	16146	TRBV10-2	TRBJ2-7	4	8	HLA-A*03:01	B2M	MHCI	https://www.10xgenomics.com/resources/application-notes/a-new-way-of-exploring-immunity-linking-highly-multiplexed-antigen-recognition-to-immune-repertoire-and-phenotype/#	0	HomoSapiens	TRB
25	CASSLGQGYEQYF	NA	NA	1	NA	NA	NA	NA	NA	NA	NA	NA	NA	NA	NA	NA	NA	NA	NA	NA	NA	NA	NA	NA	NA	NA	NA	NA	NA	NA	NA	NA	TRB	HomoSapiens	KLMNIQQKL	AKAP13	HomoSapiens	0	TRBV13-1	TRBJ2-7	5	8	HLA-A*02:01	B2M	MHCI	PMID:25837513	0	HomoSapiens	TRB
26	CASSLGQNYGYTF	NA	1	1	NA	NA	NA	NA	NA	NA	NA	NA	NA	NA	NA	NA	NA	NA	NA	NA	NA	NA	NA	NA	NA	NA	NA	NA	NA	NA	NA	NA	TRB	HomoSapiens	KLGGALQAK	IE1	CMV	10699	TRBV27	TRBJ1-2	5	7	HLA-A*03:01	B2M	MHCI	https://www.10xgenomics.com/resources/application-notes/a-new-way-of-exploring-immunity-linking-highly-multiplexed-antigen-recognition-to-immune-repertoire-and-phenotype/#	0	HomoSapiens	TRB
27	CASSLGRGEQYF	NA	NA	1	NA	NA	NA	NA	NA	NA	NA	NA	NA	NA	NA	NA	NA	NA	NA	NA	NA	NA	NA	NA	NA	NA	NA	NA	NA	NA	NA	NA	TRB	HomoSapiens	PKYVKQNTLKLAT	HA	InfluenzaA	0	TRBV7-2	TRBJ2-7	5	8	HLA-DRA*01	HLA-DRB1*01	MHCII	PMID:12466894	0	HomoSapiens	TRB
28	CASSLGTGAYEQYF	NA	NA	1	NA	NA	NA	NA	NA	NA	NA	NA	NA	NA	NA	NA	NA	NA	NA	NA	NA	NA	NA	NA	NA	NA	NA	NA	NA	NA	NA	NA	TRB	HomoSapiens	KLGGALQAK	IE1	CMV	7510	TRBV12-4	TRBJ2-7	5	9	HLA-A*03:01	B2M	MHCI	https://www.10xgenomics.com/resources/application-notes/a-new-way-of-exploring-immunity-linking-highly-multiplexed-antigen-recognition-to-immune-repertoire-and-phenotype/#	0	HomoSapiens	TRB
29	CASSLGVNTEAFF	NA	1	1	NA	NA	NA	NA	NA	NA	NA	NA	NA	NA	NA	NA	NA	NA	NA	NA	NA	NA	NA	NA	NA	NA	NA	NA	NA	NA	NA	NA	TRB	HomoSapiens	NLVPMVATV	pp65	CMV	0	TRBV12-3	TRBJ1-1	5	7	HLA-A*02	B2M	MHCI	PMID:28423320	0	HomoSapiens	TRB
30	CASSLLGNTGELFF	NA	NA	1	NA	NA	NA	NA	NA	NA	NA	NA	NA	NA	NA	NA	NA	NA	NA	NA	NA	NA	NA	NA	NA	NA	NA	NA	NA	NA	NA	NA	TRB	HomoSapiens	EIYKRWII	Gag	HIV-1	0	TRBV7-8	TRBJ2-2	5	7	HLA-B*08	B2M	MHCI	PMID:25320304	0	HomoSapiens	TRB
31	CASSLPQGANEQYF	NA	1	NA	NA	NA	NA	NA	NA	NA	NA	NA	NA	NA	NA	NA	NA	NA	NA	NA	NA	NA	NA	NA	NA	NA	NA	NA	NA	NA	NA	NA	NA	NA	NA	NA	NA	NA	NA	NA	NA	NA	NA	NA	NA	NA	NA	NA	NA
32	CASSLQGNQPQHF	NA	NA	1	NA	NA	NA	NA	NA	NA	NA	NA	NA	NA	NA	NA	NA	NA	NA	NA	NA	NA	NA	NA	NA	NA	NA	NA	NA	NA	NA	NA	TRB	HomoSapiens	GILGFVFTL	M	InfluenzaA	0	TRBV5-1	TRBJ1-5	5	7	HLA-A*02	B2M	MHCI	PMID:28423320	0	HomoSapiens	TRB
33	CASSLQGYNEQFF	NA	NA	1	NA	NA	NA	NA	NA	NA	NA	NA	NA	NA	NA	NA	NA	NA	NA	NA	NA	NA	NA	NA	NA	NA	NA	NA	NA	NA	NA	NA	TRB	HomoSapiens	KLGGALQAK	IE1	CMV	6521	TRBV19	TRBJ2-1	4	7	HLA-A*03:01	B2M	MHCI	https://www.10xgenomics.com/resources/application-notes/a-new-way-of-exploring-immunity-linking-highly-multiplexed-antigen-recognition-to-immune-repertoire-and-phenotype/#	0	HomoSapiens	TRB
34	CASSLRTGTGELFF	NA	1	NA	NA	NA	NA	NA	NA	NA	NA	NA	NA	NA	NA	NA	NA	NA	NA	NA	NA	NA	NA	NA	NA	NA	NA	NA	NA	NA	NA	NA	NA	NA	NA	NA	NA	NA	NA	NA	NA	NA	NA	NA	NA	NA	NA	NA	NA
35	CASSLSASSYNEQFF	NA	NA	1	NA	NA	NA	NA	NA	NA	NA	NA	NA	NA	NA	NA	NA	NA	NA	NA	NA	NA	NA	NA	NA	NA	NA	NA	NA	NA	NA	NA	TRB	HomoSapiens	KLGGALQAK	IE1	CMV	10238	TRBV27	TRBJ2-1	5	8	HLA-A*03:01	B2M	MHCI	https://www.10xgenomics.com/resources/application-notes/a-new-way-of-exploring-immunity-linking-highly-multiplexed-antigen-recognition-to-immune-repertoire-and-phenotype/#	0	HomoSapiens	TRB
36	CASSLSGANTGELFF	NA	1	NA	NA	NA	NA	NA	NA	NA	NA	NA	NA	NA	NA	NA	NA	NA	NA	NA	NA	NA	NA	NA	NA	NA	NA	NA	NA	NA	NA	NA	NA	NA	NA	NA	NA	NA	NA	NA	NA	NA	NA	NA	NA	NA	NA	NA	NA
37	CASSLSRQETQYF	NA	1	NA	NA	NA	NA	NA	NA	NA	NA	NA	NA	NA	NA	NA	NA	NA	NA	NA	NA	NA	NA	NA	NA	NA	NA	NA	NA	NA	NA	NA	NA	NA	NA	NA	NA	NA	NA	NA	NA	NA	NA	NA	NA	NA	NA	NA	NA
38	CASSPDRGPYNEQFF	NA	1	NA	NA	NA	NA	NA	NA	NA	NA	NA	NA	NA	NA	NA	NA	NA	NA	NA	NA	NA	NA	NA	NA	NA	NA	NA	NA	NA	NA	NA	NA	NA	NA	NA	NA	NA	NA	NA	NA	NA	NA	NA	NA	NA	NA	NA	NA
39	CASSPGQGGNEQFF	NA	1	NA	NA	NA	NA	NA	NA	NA	NA	NA	NA	NA	NA	NA	NA	NA	NA	NA	NA	NA	NA	NA	NA	NA	NA	NA	NA	NA	NA	NA	NA	NA	NA	NA	NA	NA	NA	NA	NA	NA	NA	NA	NA	NA	NA	NA	NA
40	CASSPGRSNEKLFF	NA	1	NA	NA	NA	NA	NA	NA	NA	NA	NA	NA	NA	NA	NA	NA	NA	NA	NA	NA	NA	NA	NA	NA	NA	NA	NA	NA	NA	NA	NA	NA	NA	NA	NA	NA	NA	NA	NA	NA	NA	NA	NA	NA	NA	NA	NA	NA
41	CASSPGRVYGYTF	NA	NA	1	NA	NA	NA	NA	NA	NA	NA	NA	NA	NA	NA	NA	NA	NA	NA	NA	NA	NA	NA	NA	NA	NA	NA	NA	NA	NA	NA	NA	TRB	HomoSapiens	GILGFVFTL	M	InfluenzaA	1782	TRBV27	TRBJ1-2	4	8	HLA-A*02:01	B2M	MHCI	https://www.10xgenomics.com/resources/application-notes/a-new-way-of-exploring-immunity-linking-highly-multiplexed-antigen-recognition-to-immune-repertoire-and-phenotype/#	0	HomoSapiens	TRB
42	CASSPGTGSYEQYF	NA	NA	1	NA	NA	NA	NA	NA	NA	NA	NA	NA	NA	NA	NA	NA	NA	NA	NA	NA	NA	NA	NA	NA	NA	NA	NA	NA	NA	NA	NA	TRB	HomoSapiens	KLGGALQAK	IE1	CMV	10085	TRBV5-1	TRBJ2-7	4	8	HLA-A*03:01	B2M	MHCI	https://www.10xgenomics.com/resources/application-notes/a-new-way-of-exploring-immunity-linking-highly-multiplexed-antigen-recognition-to-immune-repertoire-and-phenotype/#	0	HomoSapiens	TRB
43	CASSPGTGSYEQYF	NA	NA	1	NA	NA	NA	NA	NA	NA	NA	NA	NA	NA	NA	NA	NA	NA	NA	NA	NA	NA	NA	NA	NA	NA	NA	NA	NA	NA	NA	NA	TRB	HomoSapiens	RAKFKQLL	BZLF1	EBV	0	TRBV5-1	TRBJ2-7	4	8	HLA-B*08:01	B2M	MHCI	PMID:24512815	2	HomoSapiens	TRB
44	CASSPLNTGELFF	NA	1	1	NA	NA	NA	NA	NA	NA	NA	NA	NA	NA	NA	NA	NA	NA	NA	NA	NA	NA	NA	NA	NA	NA	NA	NA	NA	NA	NA	NA	TRB	HomoSapiens	KLGGALQAK	IE1	CMV	12385	TRBV2	TRBJ2-2	4	6	HLA-A*03:01	B2M	MHCI	https://www.10xgenomics.com/resources/application-notes/a-new-way-of-exploring-immunity-linking-highly-multiplexed-antigen-recognition-to-immune-repertoire-and-phenotype/#	0	HomoSapiens	TRB
45	CASSPQGPNEQFF	NA	1	NA	NA	NA	NA	NA	NA	NA	NA	NA	NA	NA	NA	NA	NA	NA	NA	NA	NA	NA	NA	NA	NA	NA	NA	NA	NA	NA	NA	NA	NA	NA	NA	NA	NA	NA	NA	NA	NA	NA	NA	NA	NA	NA	NA	NA	NA
46	CASSPSGSYEQYF	NA	NA	1	NA	NA	NA	NA	NA	NA	NA	NA	NA	NA	NA	NA	NA	NA	NA	NA	NA	NA	NA	NA	NA	NA	NA	NA	NA	NA	NA	NA	TRB	HomoSapiens	KLGGALQAK	IE1	CMV	11974	TRBV7-9	TRBJ2-7	4	7	HLA-A*03:01	B2M	MHCI	https://www.10xgenomics.com/resources/application-notes/a-new-way-of-exploring-immunity-linking-highly-multiplexed-antigen-recognition-to-immune-repertoire-and-phenotype/#	0	HomoSapiens	TRB
47	CASSPTGELFF	NA	NA	1	NA	NA	NA	NA	NA	NA	NA	NA	NA	NA	NA	NA	NA	NA	NA	NA	NA	NA	NA	NA	NA	NA	NA	NA	NA	NA	NA	NA	TRB	HomoSapiens	KLGGALQAK	IE1	CMV	12671	TRBV11-3	TRBJ2-2	4	5	HLA-A*03:01	B2M	MHCI	https://www.10xgenomics.com/resources/application-notes/a-new-way-of-exploring-immunity-linking-highly-multiplexed-antigen-recognition-to-immune-repertoire-and-phenotype/#	0	HomoSapiens	TRB
48	CASSQGNEQFF	NA	NA	1	NA	NA	NA	NA	NA	NA	NA	NA	NA	NA	NA	NA	NA	NA	NA	NA	NA	NA	NA	NA	NA	NA	NA	NA	NA	NA	NA	NA	TRB	HomoSapiens	GILGFVFTL	M	InfluenzaA	0	TRBV14	TRBJ2-1	5	6	HLA-A*02:01	B2M	MHCI	PMID:28636589	0	HomoSapiens	TRB
49	CASSQGNEQFF	NA	NA	1	NA	NA	NA	NA	NA	NA	NA	NA	NA	NA	NA	NA	NA	NA	NA	NA	NA	NA	NA	NA	NA	NA	NA	NA	NA	NA	NA	NA	TRB	HomoSapiens	KLGGALQAK	IE1	CMV	18465	TRBV5-1	TRBJ2-1	4	6	HLA-A*03:01	B2M	MHCI	https://www.10xgenomics.com/resources/application-notes/a-new-way-of-exploring-immunity-linking-highly-multiplexed-antigen-recognition-to-immune-repertoire-and-phenotype/#	0	HomoSapiens	TRB
50	CASSRGQGLNEKLFF	NA	1	NA	NA	NA	NA	NA	NA	NA	NA	NA	NA	NA	NA	NA	NA	NA	NA	NA	NA	NA	NA	NA	NA	NA	NA	NA	NA	NA	NA	NA	NA	NA	NA	NA	NA	NA	NA	NA	NA	NA	NA	NA	NA	NA	NA	NA	NA
51	CASSRTENTEAFF	NA	NA	1	NA	NA	NA	NA	NA	NA	NA	NA	NA	NA	NA	NA	NA	NA	NA	NA	NA	NA	NA	NA	NA	NA	NA	NA	NA	NA	NA	NA	TRB	HomoSapiens	KLGGALQAK	IE1	CMV	8952	TRBV5-4	TRBJ1-1	4	7	HLA-A*03:01	B2M	MHCI	https://www.10xgenomics.com/resources/application-notes/a-new-way-of-exploring-immunity-linking-highly-multiplexed-antigen-recognition-to-immune-repertoire-and-phenotype/#	0	HomoSapiens	TRB
52	CASSSDREEQYF	NA	NA	1	NA	NA	NA	NA	NA	NA	NA	NA	NA	NA	NA	NA	NA	NA	NA	NA	NA	NA	NA	NA	NA	NA	NA	NA	NA	NA	NA	NA	TRB	HomoSapiens	KRWIILGLNK	Gag	HIV-1	0	TRBV7-9	TRBJ2-7	4	9	HLA-B*27:05	B2M	MHCI	PMID:17893201	1	HomoSapiens	TRB
53	CASSSGGNEQFF	NA	NA	1	NA	NA	NA	NA	NA	NA	NA	NA	NA	NA	NA	NA	NA	NA	NA	NA	NA	NA	NA	NA	NA	NA	NA	NA	NA	NA	NA	NA	TRB	HomoSapiens	GLCTLVAML	BMLF1	EBV	0	TRBV6-5	TRBJ2-1	4	7	HLA-A*02:01	B2M	MHCI	PMID:28636589	0	HomoSapiens	TRB
54	CASSSGQSYEQYF	NA	1	NA	NA	NA	NA	NA	NA	NA	NA	NA	NA	NA	NA	NA	NA	NA	NA	NA	NA	NA	NA	NA	NA	NA	NA	NA	NA	NA	NA	NA	NA	NA	NA	NA	NA	NA	NA	NA	NA	NA	NA	NA	NA	NA	NA	NA	NA
55	CASSSTGGTEAFF	NA	1	1	NA	NA	NA	NA	NA	NA	NA	NA	NA	NA	NA	NA	NA	NA	NA	NA	NA	NA	NA	NA	NA	NA	NA	NA	NA	NA	NA	NA	TRB	HomoSapiens	KLGGALQAK	IE1	CMV	8551	TRBV5-5	TRBJ1-1	4	8	HLA-A*03:01	B2M	MHCI	https://www.10xgenomics.com/resources/application-notes/a-new-way-of-exploring-immunity-linking-highly-multiplexed-antigen-recognition-to-immune-repertoire-and-phenotype/#	0	HomoSapiens	TRB
56	CASSVGPSTDTQYF	NA	NA	1	NA	NA	NA	NA	NA	NA	NA	NA	NA	NA	NA	NA	NA	NA	NA	NA	NA	NA	NA	NA	NA	NA	NA	NA	NA	NA	NA	NA	TRB	HomoSapiens	KLGGALQAK	IE1	CMV	15038	TRBV6-5	TRBJ2-3	4	7	HLA-A*03:01	B2M	MHCI	https://www.10xgenomics.com/resources/application-notes/a-new-way-of-exploring-immunity-linking-highly-multiplexed-antigen-recognition-to-immune-repertoire-and-phenotype/#	0	HomoSapiens	TRB
57	CATSDPGQGNNEQFF	NA	1	NA	NA	NA	NA	NA	NA	NA	NA	NA	NA	NA	NA	NA	NA	NA	NA	NA	NA	NA	NA	NA	NA	NA	NA	NA	NA	NA	NA	NA	NA	NA	NA	NA	NA	NA	NA	NA	NA	NA	NA	NA	NA	NA	NA	NA	NA
58	CSAPGQGTYEQYF	NA	NA	1	NA	NA	NA	NA	NA	NA	NA	NA	NA	NA	NA	NA	NA	NA	NA	NA	NA	NA	NA	NA	NA	NA	NA	NA	NA	NA	NA	NA	TRB	HomoSapiens	KLGGALQAK	IE1	CMV	8266	TRBV20-1	TRBJ2-7	3	8	HLA-A*03:01	B2M	MHCI	https://www.10xgenomics.com/resources/application-notes/a-new-way-of-exploring-immunity-linking-highly-multiplexed-antigen-recognition-to-immune-repertoire-and-phenotype/#	0	HomoSapiens	TRB
59	CAIRDSSGNTIYF	NA	2	NA	NA	NA	NA	NA	NA	NA	NA	NA	NA	NA	NA	NA	NA	NA	NA	NA	NA	NA	NA	NA	NA	NA	NA	NA	NA	NA	NA	NA	NA	NA	NA	NA	NA	NA	NA	NA	NA	NA	NA	NA	NA	NA	NA	NA	NA
60	CASRGTGEGQPQHF	NA	1	NA	NA	NA	NA	NA	NA	NA	NA	NA	NA	NA	NA	NA	NA	NA	NA	NA	NA	NA	NA	NA	NA	NA	NA	NA	NA	NA	NA	NA	NA	NA	NA	NA	NA	NA	NA	NA	NA	NA	NA	NA	NA	NA	NA	NA	NA
61	CASSDGDEQFF	NA	1	1	NA	NA	NA	NA	NA	NA	NA	NA	NA	NA	NA	NA	NA	NA	NA	NA	NA	NA	NA	NA	NA	NA	NA	NA	NA	NA	NA	NA	TRB	HomoSapiens	NLVPMVATV	pp65	CMV	0	TRBV10-2	TRBJ2-1	4	7	HLA-A*02	B2M	MHCI	PMID:28423320	0	HomoSapiens	TRB
62	CASSFADTEAFF	NA	1	NA	NA	NA	NA	NA	NA	NA	NA	NA	NA	NA	NA	NA	NA	NA	NA	NA	NA	NA	NA	NA	NA	NA	NA	NA	NA	NA	NA	NA	NA	NA	NA	NA	NA	NA	NA	NA	NA	NA	NA	NA	NA	NA	NA	NA	NA
63	CASSHGQGYEQYF	NA	NA	1	NA	NA	NA	NA	NA	NA	NA	NA	NA	NA	NA	NA	NA	NA	NA	NA	NA	NA	NA	NA	NA	NA	NA	NA	NA	NA	NA	NA	TRB	HomoSapiens	KLGGALQAK	IE1	CMV	16880	TRBV11-2	TRBJ2-7	4	8	HLA-A*03:01	B2M	MHCI	https://www.10xgenomics.com/resources/application-notes/a-new-way-of-exploring-immunity-linking-highly-multiplexed-antigen-recognition-to-immune-repertoire-and-phenotype/#	0	HomoSapiens	TRB
64	CASSLAGAYNEQFF	NA	2	2	NA	NA	NA	NA	NA	NA	NA	NA	NA	NA	NA	NA	NA	NA	NA	NA	NA	NA	NA	NA	NA	NA	NA	NA	NA	NA	NA	NA	TRB	HomoSapiens	NLVPMVATV	pp65	CMV	0	TRBV12-3	TRBJ2-1	5	8	HLA-A*02	B2M	MHCI	PMID:28423320	0	HomoSapiens	TRB
65	CASSLAGGGSYEQYF	NA	1	NA	NA	NA	NA	NA	NA	NA	NA	NA	NA	NA	NA	NA	NA	NA	NA	NA	NA	NA	NA	NA	NA	NA	NA	NA	NA	NA	NA	NA	NA	NA	NA	NA	NA	NA	NA	NA	NA	NA	NA	NA	NA	NA	NA	NA	NA
66	CASSLAGGPNEQFF	NA	1	NA	NA	NA	NA	NA	NA	NA	NA	NA	NA	NA	NA	NA	NA	NA	NA	NA	NA	NA	NA	NA	NA	NA	NA	NA	NA	NA	NA	NA	NA	NA	NA	NA	NA	NA	NA	NA	NA	NA	NA	NA	NA	NA	NA	NA	NA
67	CASSLAGGSNQPQHF	NA	2	2	NA	NA	NA	NA	NA	NA	NA	NA	NA	NA	NA	NA	NA	NA	NA	NA	NA	NA	NA	NA	NA	NA	NA	NA	NA	NA	NA	NA	TRB	HomoSapiens	GILGFVFTL	M	InfluenzaA	0	TRBV7-9	TRBJ1-5	5	8	HLA-A*02:01	B2M	MHCI	PMID:28636589	1	HomoSapiens	TRB
68	CASSLAQETQYF	NA	1	1	NA	NA	NA	NA	NA	NA	NA	NA	NA	NA	NA	NA	NA	NA	NA	NA	NA	NA	NA	NA	NA	NA	NA	NA	NA	NA	NA	NA	TRB	HomoSapiens	KLGGALQAK	IE1	CMV	19529	TRBV11-2	TRBJ2-5	5	6	HLA-A*03:01	B2M	MHCI	https://www.10xgenomics.com/resources/application-notes/a-new-way-of-exploring-immunity-linking-highly-multiplexed-antigen-recognition-to-immune-repertoire-and-phenotype/#	0	HomoSapiens	TRB
69	CASSLDRGHEQYF	NA	NA	1	NA	NA	NA	NA	NA	NA	NA	NA	NA	NA	NA	NA	NA	NA	NA	NA	NA	NA	NA	NA	NA	NA	NA	NA	NA	NA	NA	NA	TRB	HomoSapiens	AVFDRKSDAK	EBNA4	EBV	18337	TRBV5-1	TRBJ2-7	5	9	HLA-A*11:01	B2M	MHCI	https://www.10xgenomics.com/resources/application-notes/a-new-way-of-exploring-immunity-linking-highly-multiplexed-antigen-recognition-to-immune-repertoire-and-phenotype/#	0	HomoSapiens	TRB
70	CASSLDRGHEQYF	NA	NA	1	NA	NA	NA	NA	NA	NA	NA	NA	NA	NA	NA	NA	NA	NA	NA	NA	NA	NA	NA	NA	NA	NA	NA	NA	NA	NA	NA	NA	TRB	HomoSapiens	KLGGALQAK	IE1	CMV	18336	TRBV5-1	TRBJ2-7	5	9	HLA-A*03:01	B2M	MHCI	https://www.10xgenomics.com/resources/application-notes/a-new-way-of-exploring-immunity-linking-highly-multiplexed-antigen-recognition-to-immune-repertoire-and-phenotype/#	0	HomoSapiens	TRB
71	CASSLGGQYGYTF	NA	1	NA	NA	NA	NA	NA	NA	NA	NA	NA	NA	NA	NA	NA	NA	NA	NA	NA	NA	NA	NA	NA	NA	NA	NA	NA	NA	NA	NA	NA	NA	NA	NA	NA	NA	NA	NA	NA	NA	NA	NA	NA	NA	NA	NA	NA	NA
72	CASSLGGTEAFF	NA	1	1	NA	NA	NA	NA	NA	NA	NA	NA	NA	NA	NA	NA	NA	NA	NA	NA	NA	NA	NA	NA	NA	NA	NA	NA	NA	NA	NA	NA	TRB	HomoSapiens	NLVPMVATV	pp65	CMV	0	TRBV27	TRBJ1-1	5	7	HLA-A*02	B2M	MHCI	PMID:28423320	0	HomoSapiens	TRB
73	CASSLGGTEAFF	NA	1	1	NA	NA	NA	NA	NA	NA	NA	NA	NA	NA	NA	NA	NA	NA	NA	NA	NA	NA	NA	NA	NA	NA	NA	NA	NA	NA	NA	NA	TRB	HomoSapiens	NLVPMVATV	pp65	CMV	0	TRBV27	TRBJ1-1	5	7	HLA-A*02	B2M	MHCI	PMID:28423320	0	HomoSapiens	TRB
74	CASSLGGTEAFF	NA	1	1	NA	NA	NA	NA	NA	NA	NA	NA	NA	NA	NA	NA	NA	NA	NA	NA	NA	NA	NA	NA	NA	NA	NA	NA	NA	NA	NA	NA	TRB	HomoSapiens	KLGGALQAK	IE1	CMV	1676	TRBV5-4	TRBJ1-1	5	7	HLA-A*03:01	B2M	MHCI	https://www.10xgenomics.com/resources/application-notes/a-new-way-of-exploring-immunity-linking-highly-multiplexed-antigen-recognition-to-immune-repertoire-and-phenotype/#	0	HomoSapiens	TRB
75	CASSLGGTEAFF	NA	1	1	NA	NA	NA	NA	NA	NA	NA	NA	NA	NA	NA	NA	NA	NA	NA	NA	NA	NA	NA	NA	NA	NA	NA	NA	NA	NA	NA	NA	TRB	HomoSapiens	KLGGALQAK	IE1	CMV	1676	TRBV5-4	TRBJ1-1	5	7	HLA-A*03:01	B2M	MHCI	https://www.10xgenomics.com/resources/application-notes/a-new-way-of-exploring-immunity-linking-highly-multiplexed-antigen-recognition-to-immune-repertoire-and-phenotype/#	0	HomoSapiens	TRB
76	CASSLGTANTGELFF	NA	NA	2	NA	NA	NA	NA	NA	NA	NA	NA	NA	NA	NA	NA	NA	NA	NA	NA	NA	NA	NA	NA	NA	NA	NA	NA	NA	NA	NA	NA	TRB	HomoSapiens	KLGGALQAK	IE1	CMV	9.98916E+12	TRBV7-6,TRBV27	TRBJ2-2	5	8	HLA-A*03:01	B2M	MHCI	https://www.10xgenomics.com/resources/application-notes/a-new-way-of-exploring-immunity-linking-highly-multiplexed-antigen-recognition-to-immune-repertoire-and-phenotype/#	0	HomoSapiens	TRB
77	CASSLGTDTQYF	NA	1	1	NA	NA	NA	NA	NA	NA	NA	NA	NA	NA	NA	NA	NA	NA	NA	NA	NA	NA	NA	NA	NA	NA	NA	NA	NA	NA	NA	NA	TRB	HomoSapiens	KLGGALQAK	IE1	CMV	15330	TRBV7-9	TRBJ2-3	5	6	HLA-A*03:01	B2M	MHCI	https://www.10xgenomics.com/resources/application-notes/a-new-way-of-exploring-immunity-linking-highly-multiplexed-antigen-recognition-to-immune-repertoire-and-phenotype/#	0	HomoSapiens	TRB
78	CASSLGTDTQYF	NA	1	1	NA	NA	NA	NA	NA	NA	NA	NA	NA	NA	NA	NA	NA	NA	NA	NA	NA	NA	NA	NA	NA	NA	NA	NA	NA	NA	NA	NA	TRB	HomoSapiens	KLGGALQAK	IE1	CMV	15330	TRBV7-9	TRBJ2-3	5	6	HLA-A*03:01	B2M	MHCI	https://www.10xgenomics.com/resources/application-notes/a-new-way-of-exploring-immunity-linking-highly-multiplexed-antigen-recognition-to-immune-repertoire-and-phenotype/#	0	HomoSapiens	TRB
79	CASSLGTDTQYF	NA	1	1	NA	NA	NA	NA	NA	NA	NA	NA	NA	NA	NA	NA	NA	NA	NA	NA	NA	NA	NA	NA	NA	NA	NA	NA	NA	NA	NA	NA	TRB	HomoSapiens	NLVPMVATV	pp65	CMV	0	TRBV12-3	TRBJ2-3	5	6	HLA-A*02	B2M	MHCI	PMID:28423320	0	HomoSapiens	TRB
80	CASSLGTDTQYF	NA	1	1	NA	NA	NA	NA	NA	NA	NA	NA	NA	NA	NA	NA	NA	NA	NA	NA	NA	NA	NA	NA	NA	NA	NA	NA	NA	NA	NA	NA	TRB	HomoSapiens	NLVPMVATV	pp65	CMV	0	TRBV12-3	TRBJ2-3	5	6	HLA-A*02	B2M	MHCI	PMID:28423320	0	HomoSapiens	TRB
81	CASSLLENTEAFF	NA	1	1	NA	NA	NA	NA	NA	NA	NA	NA	NA	NA	NA	NA	NA	NA	NA	NA	NA	NA	NA	NA	NA	NA	NA	NA	NA	NA	NA	NA	TRB	HomoSapiens	KLGGALQAK	IE1	CMV	1234511872	TRBV7-3	TRBJ1-1	5	7	HLA-A*03:01	B2M	MHCI	https://www.10xgenomics.com/resources/application-notes/a-new-way-of-exploring-immunity-linking-highly-multiplexed-antigen-recognition-to-immune-repertoire-and-phenotype/#	0	HomoSapiens	TRB
82	CASSLLGDQPQHF	NA	2	2	NA	NA	NA	NA	NA	NA	NA	NA	NA	NA	NA	NA	NA	NA	NA	NA	NA	NA	NA	NA	NA	NA	NA	NA	NA	NA	NA	NA	TRB	HomoSapiens	NLVPMVATV	pp65	CMV	0	TRBV3-1	TRBJ1-5	4	8	HLA-A*02	B2M	MHCI	PMID:28423320	0	HomoSapiens	TRB
83	CASSLMAGSYEQYF	NA	NA	1	NA	NA	NA	NA	NA	NA	NA	NA	NA	NA	NA	NA	NA	NA	NA	NA	NA	NA	NA	NA	NA	NA	NA	NA	NA	NA	NA	NA	TRB	HomoSapiens	GILGFVFTL	M	InfluenzaA	19811	TRBV27	TRBJ2-7	5	8	HLA-A*02:01	B2M	MHCI	https://www.10xgenomics.com/resources/application-notes/a-new-way-of-exploring-immunity-linking-highly-multiplexed-antigen-recognition-to-immune-repertoire-and-phenotype/#	0	HomoSapiens	TRB
84	CASSLPGSYEQYF	NA	NA	1	NA	NA	NA	NA	NA	NA	NA	NA	NA	NA	NA	NA	NA	NA	NA	NA	NA	NA	NA	NA	NA	NA	NA	NA	NA	NA	NA	NA	TRB	HomoSapiens	KLGGALQAK	IE1	CMV	192385423	TRBV5-1,TRBV5-8	TRBJ2-7	5	7	HLA-A*03:01	B2M	MHCI	https://www.10xgenomics.com/resources/application-notes/a-new-way-of-exploring-immunity-linking-highly-multiplexed-antigen-recognition-to-immune-repertoire-and-phenotype/#	0	HomoSapiens	TRB
85	CASSLQGNYGYTF	NA	1	1	NA	NA	NA	NA	NA	NA	NA	NA	NA	NA	NA	NA	NA	NA	NA	NA	NA	NA	NA	NA	NA	NA	NA	NA	NA	NA	NA	NA	TRB	HomoSapiens	GILGFVFTL	M	InfluenzaA	0	TRBV7-3	TRBJ1-2	5	7	HLA-A*02:01	B2M	MHCI	PMID:28636589	0	HomoSapiens	TRB
86	CASSLTGRNTEAFF	NA	1	NA	NA	NA	NA	NA	NA	NA	NA	NA	NA	NA	NA	NA	NA	NA	NA	NA	NA	NA	NA	NA	NA	NA	NA	NA	NA	NA	NA	NA	NA	NA	NA	NA	NA	NA	NA	NA	NA	NA	NA	NA	NA	NA	NA	NA	NA
87	CASSLTSGSSYEQYF	NA	2	2	NA	NA	NA	NA	NA	NA	NA	NA	NA	NA	NA	NA	NA	NA	NA	NA	NA	NA	NA	NA	NA	NA	NA	NA	NA	NA	NA	NA	TRB	HomoSapiens	NLVPMVATV	pp65	CMV	0	TRBV27	TRBJ2-7	5	9	HLA-A*02	B2M	MHCI	PMID:28423320	0	HomoSapiens	TRB
88	CASSLVPDTQYF	NA	1	NA	NA	NA	NA	NA	NA	NA	NA	NA	NA	NA	NA	NA	NA	NA	NA	NA	NA	NA	NA	NA	NA	NA	NA	NA	NA	NA	NA	NA	NA	NA	NA	NA	NA	NA	NA	NA	NA	NA	NA	NA	NA	NA	NA	NA	NA
89	CASSPLGPVTGELFF	NA	1	NA	NA	NA	NA	NA	NA	NA	NA	NA	NA	NA	NA	NA	NA	NA	NA	NA	NA	NA	NA	NA	NA	NA	NA	NA	NA	NA	NA	NA	NA	NA	NA	NA	NA	NA	NA	NA	NA	NA	NA	NA	NA	NA	NA	NA	NA
90	CASSPLRNQPQHF	NA	1	NA	NA	NA	NA	NA	NA	NA	NA	NA	NA	NA	NA	NA	NA	NA	NA	NA	NA	NA	NA	NA	NA	NA	NA	NA	NA	NA	NA	NA	NA	NA	NA	NA	NA	NA	NA	NA	NA	NA	NA	NA	NA	NA	NA	NA	NA
91	CASSPPASGSYEQFF	NA	3	NA	NA	NA	NA	NA	NA	NA	NA	NA	NA	NA	NA	NA	NA	NA	NA	NA	NA	NA	NA	NA	NA	NA	NA	NA	NA	NA	NA	NA	NA	NA	NA	NA	NA	NA	NA	NA	NA	NA	NA	NA	NA	NA	NA	NA	NA
92	CASSPRQGASTGELFF	NA	1	NA	NA	NA	NA	NA	NA	NA	NA	NA	NA	NA	NA	NA	NA	NA	NA	NA	NA	NA	NA	NA	NA	NA	NA	NA	NA	NA	NA	NA	NA	NA	NA	NA	NA	NA	NA	NA	NA	NA	NA	NA	NA	NA	NA	NA	NA
93	CASSPTGGYGYTF	NA	1	1	NA	NA	NA	NA	NA	NA	NA	NA	NA	NA	NA	NA	NA	NA	NA	NA	NA	NA	NA	NA	NA	NA	NA	NA	NA	NA	NA	NA	TRB	HomoSapiens	KLGGALQAK	IE1	CMV	18311	TRBV6-3	TRBJ1-2	4	8	HLA-A*03:01	B2M	MHCI	https://www.10xgenomics.com/resources/application-notes/a-new-way-of-exploring-immunity-linking-highly-multiplexed-antigen-recognition-to-immune-repertoire-and-phenotype/#	0	HomoSapiens	TRB
94	CASSPVGTEAFF	NA	NA	1	NA	NA	NA	NA	NA	NA	NA	NA	NA	NA	NA	NA	NA	NA	NA	NA	NA	NA	NA	NA	NA	NA	NA	NA	NA	NA	NA	NA	TRB	HomoSapiens	GILGFVFTL	M	InfluenzaA	0	TRBV18	TRBJ1-1	5	7	HLA-A*02	B2M	MHCI	PMID:28423320	0	HomoSapiens	TRB
95	CASSQDLGSGANVLTF	NA	NA	1	NA	NA	NA	NA	NA	NA	NA	NA	NA	NA	NA	NA	NA	NA	NA	NA	NA	NA	NA	NA	NA	NA	NA	NA	NA	NA	NA	NA	TRB	HomoSapiens	KLGGALQAK	IE1	CMV	9677	TRBV4-3	TRBJ2-6	5	8	HLA-A*03:01	B2M	MHCI	https://www.10xgenomics.com/resources/application-notes/a-new-way-of-exploring-immunity-linking-highly-multiplexed-antigen-recognition-to-immune-repertoire-and-phenotype/#	0	HomoSapiens	TRB
96	CASSQGTVYGYTF	NA	NA	1	NA	NA	NA	NA	NA	NA	NA	NA	NA	NA	NA	NA	NA	NA	NA	NA	NA	NA	NA	NA	NA	NA	NA	NA	NA	NA	NA	NA	TRB	HomoSapiens	KLGGALQAK	IE1	CMV	10228	TRBV4-2	TRBJ1-2	5	8	HLA-A*03:01	B2M	MHCI	https://www.10xgenomics.com/resources/application-notes/a-new-way-of-exploring-immunity-linking-highly-multiplexed-antigen-recognition-to-immune-repertoire-and-phenotype/#	0	HomoSapiens	TRB
97	CASSSAGYEQYF	NA	NA	1	NA	NA	NA	NA	NA	NA	NA	NA	NA	NA	NA	NA	NA	NA	NA	NA	NA	NA	NA	NA	NA	NA	NA	NA	NA	NA	NA	NA	TRB	HomoSapiens	AVFDRKSDAK	EBNA4	EBV	10383	TRBV7-2	TRBJ2-7	4	7	HLA-A*11:01	B2M	MHCI	https://www.10xgenomics.com/resources/application-notes/a-new-way-of-exploring-immunity-linking-highly-multiplexed-antigen-recognition-to-immune-repertoire-and-phenotype/#	0	HomoSapiens	TRB
98	CASSSGSTDTQYF	NA	2	NA	NA	NA	NA	NA	NA	NA	NA	NA	NA	NA	NA	NA	NA	NA	NA	NA	NA	NA	NA	NA	NA	NA	NA	NA	NA	NA	NA	NA	NA	NA	NA	NA	NA	NA	NA	NA	NA	NA	NA	NA	NA	NA	NA	NA	NA
99	CASSSSGSSYNEQFF	NA	1	1	NA	NA	NA	NA	NA	NA	NA	NA	NA	NA	NA	NA	NA	NA	NA	NA	NA	NA	NA	NA	NA	NA	NA	NA	NA	NA	NA	NA	TRB	HomoSapiens	GPGHKARVL	Gag	HIV-1	0	TRBV5-1	TRBJ2-1*01	4	8	HLA-B*07:02	B2M	MHCI	PMID:21555537	0	HomoSapiens	TRB
100	CASSVGSPDTQYF	NA	2	2	NA	NA	NA	NA	NA	NA	NA	NA	NA	NA	NA	NA	NA	NA	NA	NA	NA	NA	NA	NA	NA	NA	NA	NA	NA	NA	NA	NA	TRB	HomoSapiens	NLVPMVATV	pp65	CMV	0	TRBV9	TRBJ2-3	5	8	HLA-A*02	B2M	MHCI	PMID:28423320	0	HomoSapiens	TRB
101	CASSLGANQPQHF	NA	2	NA	NA	NA	NA	NA	NA	NA	NA	NA	NA	NA	NA	NA	NA	NA	NA	NA	NA	NA	NA	NA	NA	NA	NA	NA	NA	NA	NA	NA	NA	NA	NA	NA	NA	NA	NA	NA	NA	NA	NA	NA	NA	NA	NA	NA	NA
102	CASNRESSYNSPLHF	NA	2	NA	NA	NA	NA	NA	NA	NA	NA	NA	NA	NA	NA	NA	NA	NA	NA	NA	NA	NA	NA	NA	NA	NA	NA	NA	NA	NA	NA	NA	NA	NA	NA	NA	NA	NA	NA	NA	NA	NA	NA	NA	NA	NA	NA	NA	NA
103	CASSLAGASYNEQFF	NA	2	NA	NA	NA	NA	NA	NA	NA	NA	NA	NA	NA	NA	NA	NA	NA	NA	NA	NA	NA	NA	NA	NA	NA	NA	NA	NA	NA	NA	NA	NA	NA	NA	NA	NA	NA	NA	NA	NA	NA	NA	NA	NA	NA	NA	NA	NA
104	CASSLRGTEAFF	NA	2	2	NA	NA	NA	NA	NA	NA	NA	NA	NA	NA	NA	NA	NA	NA	NA	NA	NA	NA	NA	NA	NA	NA	NA	NA	NA	NA	NA	NA	TRB	HomoSapiens	KLGGALQAK	IE1	CMV	1382514381	TRBV13,TRBV27	TRBJ1-1	5	7	HLA-A*03:01	B2M	MHCI	https://www.10xgenomics.com/resources/application-notes/a-new-way-of-exploring-immunity-linking-highly-multiplexed-antigen-recognition-to-immune-repertoire-and-phenotype/#	0	HomoSapiens	TRB
105	CASSPGTNYGYTF	NA	2	2	NA	NA	NA	NA	NA	NA	NA	NA	NA	NA	NA	NA	NA	NA	NA	NA	NA	NA	NA	NA	NA	NA	NA	NA	NA	NA	NA	NA	TRB	HomoSapiens	KLGGALQAK	IE1	CMV	6.23269E+11	TRBV12-4	TRBJ1-2	4	7	HLA-A*03:01	B2M	MHCI	https://www.10xgenomics.com/resources/application-notes/a-new-way-of-exploring-immunity-linking-highly-multiplexed-antigen-recognition-to-immune-repertoire-and-phenotype/#	0	HomoSapiens	TRB
106	CASSPGTNYGYTF	NA	2	2	NA	NA	NA	NA	NA	NA	NA	NA	NA	NA	NA	NA	NA	NA	NA	NA	NA	NA	NA	NA	NA	NA	NA	NA	NA	NA	NA	NA	TRB	HomoSapiens	AVFDRKSDAK	EBNA4	EBV	66667805	TRBV12-4	TRBJ1-2	4	7	HLA-A*11:01	B2M	MHCI	https://www.10xgenomics.com/resources/application-notes/a-new-way-of-exploring-immunity-linking-highly-multiplexed-antigen-recognition-to-immune-repertoire-and-phenotype/#	0	HomoSapiens	TRB
107	CASSPGTNYGYTF	NA	2	2	NA	NA	NA	NA	NA	NA	NA	NA	NA	NA	NA	NA	NA	NA	NA	NA	NA	NA	NA	NA	NA	NA	NA	NA	NA	NA	NA	NA	TRB	HomoSapiens	RAKFKQLL	BZLF1	EBV	43736910	TRBV12-3,TRBV12-4	TRBJ1-2	4	7	HLA-B*08:01	B2M	MHCI	https://www.10xgenomics.com/resources/application-notes/a-new-way-of-exploring-immunity-linking-highly-multiplexed-antigen-recognition-to-immune-repertoire-and-phenotype/#	0	HomoSapiens	TRB
108	CSAPGQGNYEQYF	NA	NA	2	NA	NA	NA	NA	NA	NA	NA	NA	NA	NA	NA	NA	NA	NA	NA	NA	NA	NA	NA	NA	NA	NA	NA	NA	NA	NA	NA	NA	TRB	HomoSapiens	KLGGALQAK	IE1	CMV	5782	TRBV20-1	TRBJ2-7	3	8	HLA-A*03:01	B2M	MHCI	https://www.10xgenomics.com/resources/application-notes/a-new-way-of-exploring-immunity-linking-highly-multiplexed-antigen-recognition-to-immune-repertoire-and-phenotype/#	0	HomoSapiens	TRB
109	CASSQGDRDTGELFF	NA	3	3	NA	NA	NA	NA	NA	NA	NA	NA	NA	NA	NA	NA	NA	NA	NA	NA	NA	NA	NA	NA	NA	NA	NA	NA	NA	NA	NA	NA	TRB	HomoSapiens	NLVPMVATV	pp65	CMV	0	TRBV28	TRBJ2-2	4	9	HLA-A*02	B2M	MHCI	PMID:28423320	0	HomoSapiens	TRB
110	CASSYRDTGELFF	NA	2	2	NA	NA	NA	NA	NA	NA	NA	NA	NA	NA	NA	NA	NA	NA	NA	NA	NA	NA	NA	NA	NA	NA	NA	NA	NA	NA	NA	NA	TRB	HomoSapiens	NLVPMVATV	pp65	CMV	0	TRBV6-2	TRBJ2-2	5	7	HLA-A*02	B2M	MHCI	PMID:28423320	0	HomoSapiens	TRB
111	CASSLTDTQYF	3	3	3	NA	Human	Pathogens	Cytomegalovirus (CMV)	D003586	NA	1	Yes	pp50	P16790	VTEHDTLLY	71290	HLA-A1	PBMC	CD8	NA	NA	NA	NA	TRBV7-2	NA	TRBJ2-3	No	TGTGCCAGCAGCTTAACAGATACGCAGTATTTT	NA	28636589	NA	TRB	TRB	HomoSapiens	AVFDRKSDAK	EBNA4	EBV	812	TRBV28	TRBJ2-3	5	5	HLA-A*11:01	B2M	MHCI	https://www.10xgenomics.com/resources/application-notes/a-new-way-of-exploring-immunity-linking-highly-multiplexed-antigen-recognition-to-immune-repertoire-and-phenotype/#	0	HomoSapiens	TRB
112	CASSLTDTQYF	3	3	3	NA	Human	Pathogens	Cytomegalovirus (CMV)	D003586	NA	1	Yes	pp50	P16790	VTEHDTLLY	71290	HLA-A1	PBMC	CD8	NA	NA	NA	NA	TRBV7-2	NA	TRBJ2-3	No	TGTGCCAGCAGCTTAACAGATACGCAGTATTTT	NA	28636589	NA	TRB	TRB	HomoSapiens	AVFDRKSDAK	EBNA4	EBV	812	TRBV28	TRBJ2-3	5	5	HLA-A*11:01	B2M	MHCI	https://www.10xgenomics.com/resources/application-notes/a-new-way-of-exploring-immunity-linking-highly-multiplexed-antigen-recognition-to-immune-repertoire-and-phenotype/#	0	HomoSapiens	TRB
113	CASSLTDTQYF	3	3	3	NA	Human	Pathogens	Cytomegalovirus (CMV)	D003586	NA	1	Yes	pp50	P16790	VTEHDTLLY	71290	HLA-A1	PBMC	CD8	NA	NA	NA	NA	TRBV7-2	NA	TRBJ2-3	No	TGTGCCAGCAGCTTAACAGATACGCAGTATTTT	NA	28636589	NA	TRB	TRB	HomoSapiens	AVFDRKSDAK	EBNA4	EBV	812	TRBV28	TRBJ2-3	5	5	HLA-A*11:01	B2M	MHCI	https://www.10xgenomics.com/resources/application-notes/a-new-way-of-exploring-immunity-linking-highly-multiplexed-antigen-recognition-to-immune-repertoire-and-phenotype/#	0	HomoSapiens	TRB
114	CASSLTDTQYF	3	3	3	NA	Human	Pathogens	Cytomegalovirus (CMV)	D003586	NA	1	Yes	pp50	P16790	VTEHDTLLY	71290	HLA-A1	PBMC	CD8	NA	NA	NA	NA	TRBV7-2	NA	TRBJ2-3	No	TGTGCCAGCAGCTTAACAGATACGCAGTATTTT	NA	28636589	NA	TRB	TRB	HomoSapiens	AVFDRKSDAK	EBNA4	EBV	812	TRBV28	TRBJ2-3	5	5	HLA-A*11:01	B2M	MHCI	https://www.10xgenomics.com/resources/application-notes/a-new-way-of-exploring-immunity-linking-highly-multiplexed-antigen-recognition-to-immune-repertoire-and-phenotype/#	0	HomoSapiens	TRB
115	CASSLTDTQYF	3	3	3	NA	Human	Pathogens	Cytomegalovirus (CMV)	D003586	NA	1	Yes	pp50	P16790	VTEHDTLLY	71290	HLA-A1	PBMC	CD8	NA	NA	NA	NA	TRBV7-2	NA	TRBJ2-3	No	TGTGCCAGCAGCTTAACAGATACGCAGTATTTT	NA	28636589	NA	TRB	TRB	HomoSapiens	AVFDRKSDAK	EBNA4	EBV	812	TRBV28	TRBJ2-3	5	5	HLA-A*11:01	B2M	MHCI	https://www.10xgenomics.com/resources/application-notes/a-new-way-of-exploring-immunity-linking-highly-multiplexed-antigen-recognition-to-immune-repertoire-and-phenotype/#	0	HomoSapiens	TRB
116	CASSLTDTQYF	3	3	3	NA	Human	Pathogens	Cytomegalovirus (CMV)	D003586	NA	1	Yes	pp50	P16790	VTEHDTLLY	71290	HLA-A1	PBMC	CD8	NA	NA	NA	NA	TRBV7-2	NA	TRBJ2-3	No	TGTGCCAGCAGCTTAACAGATACGCAGTATTTT	NA	28636589	NA	TRB	TRB	HomoSapiens	AVFDRKSDAK	EBNA4	EBV	812	TRBV28	TRBJ2-3	5	5	HLA-A*11:01	B2M	MHCI	https://www.10xgenomics.com/resources/application-notes/a-new-way-of-exploring-immunity-linking-highly-multiplexed-antigen-recognition-to-immune-repertoire-and-phenotype/#	0	HomoSapiens	TRB
117	CASSLTDTQYF	3	3	3	NA	Human	Pathogens	Cytomegalovirus (CMV)	D003586	NA	1	Yes	pp50	P16790	VTEHDTLLY	71290	HLA-A1	PBMC	CD8	NA	NA	NA	NA	TRBV7-2	NA	TRBJ2-3	No	TGTGCCAGCAGCTTAACAGATACGCAGTATTTT	NA	28636589	NA	TRB	TRB	HomoSapiens	AVFDRKSDAK	EBNA4	EBV	812	TRBV28	TRBJ2-3	5	5	HLA-A*11:01	B2M	MHCI	https://www.10xgenomics.com/resources/application-notes/a-new-way-of-exploring-immunity-linking-highly-multiplexed-antigen-recognition-to-immune-repertoire-and-phenotype/#	0	HomoSapiens	TRB
118	CASSLTDTQYF	3	3	3	NA	Human	Pathogens	Cytomegalovirus (CMV)	D003586	NA	1	Yes	pp50	P16790	VTEHDTLLY	71290	HLA-A1	PBMC	CD8	NA	NA	NA	NA	TRBV7-2	NA	TRBJ2-3	No	TGTGCCAGCAGCTTAACAGATACGCAGTATTTT	NA	28636589	NA	TRB	TRB	HomoSapiens	AVFDRKSDAK	EBNA4	EBV	812	TRBV28	TRBJ2-3	5	5	HLA-A*11:01	B2M	MHCI	https://www.10xgenomics.com/resources/application-notes/a-new-way-of-exploring-immunity-linking-highly-multiplexed-antigen-recognition-to-immune-repertoire-and-phenotype/#	0	HomoSapiens	TRB
119	CASSLTDTQYF	3	3	3	NA	Human	Pathogens	Cytomegalovirus (CMV)	D003586	NA	1	Yes	pp50	P16790	VTEHDTLLY	71290	HLA-A1	PBMC	CD8	NA	NA	NA	NA	TRBV7-2	NA	TRBJ2-3	No	TGTGCCAGCAGCTTAACAGATACGCAGTATTTT	NA	28636589	NA	TRB	TRB	HomoSapiens	AVFDRKSDAK	EBNA4	EBV	812	TRBV28	TRBJ2-3	5	5	HLA-A*11:01	B2M	MHCI	https://www.10xgenomics.com/resources/application-notes/a-new-way-of-exploring-immunity-linking-highly-multiplexed-antigen-recognition-to-immune-repertoire-and-phenotype/#	0	HomoSapiens	TRB
120	CASSLTDTQYF	3	3	3	NA	Human	Pathogens	Cytomegalovirus (CMV)	D003586	NA	1	Yes	pp50	P16790	VTEHDTLLY	71290	HLA-A1	PBMC	CD8	NA	NA	NA	NA	TRBV7-2	NA	TRBJ2-3	No	TGTGCCAGCAGCTTAACAGATACGCAGTATTTT	NA	28636589	NA	TRB	TRB	HomoSapiens	AVFDRKSDAK	EBNA4	EBV	812	TRBV28	TRBJ2-3	5	5	HLA-A*11:01	B2M	MHCI	https://www.10xgenomics.com/resources/application-notes/a-new-way-of-exploring-immunity-linking-highly-multiplexed-antigen-recognition-to-immune-repertoire-and-phenotype/#	0	HomoSapiens	TRB
121	CASSLTDTQYF	3	3	3	NA	Human	Pathogens	Cytomegalovirus (CMV)	D003586	NA	1	Yes	pp50	P16790	VTEHDTLLY	71290	HLA-A1	PBMC	CD8	NA	NA	NA	NA	TRBV7-2	NA	TRBJ2-3	No	TGTGCCAGCAGCTTAACAGATACGCAGTATTTT	NA	28636589	NA	TRB	TRB	HomoSapiens	AVFDRKSDAK	EBNA4	EBV	812	TRBV28	TRBJ2-3	5	5	HLA-A*11:01	B2M	MHCI	https://www.10xgenomics.com/resources/application-notes/a-new-way-of-exploring-immunity-linking-highly-multiplexed-antigen-recognition-to-immune-repertoire-and-phenotype/#	0	HomoSapiens	TRB
122	CASSLTDTQYF	3	3	3	NA	Human	Pathogens	Cytomegalovirus (CMV)	D003586	NA	1	Yes	pp50	P16790	VTEHDTLLY	71290	HLA-A1	PBMC	CD8	NA	NA	NA	NA	TRBV7-2	NA	TRBJ2-3	No	TGTGCCAGCAGCTTAACAGATACGCAGTATTTT	NA	28636589	NA	TRB	TRB	HomoSapiens	AVFDRKSDAK	EBNA4	EBV	812	TRBV28	TRBJ2-3	5	5	HLA-A*11:01	B2M	MHCI	https://www.10xgenomics.com/resources/application-notes/a-new-way-of-exploring-immunity-linking-highly-multiplexed-antigen-recognition-to-immune-repertoire-and-phenotype/#	0	HomoSapiens	TRB
123	CASSLTDTQYF	3	3	3	NA	Human	Pathogens	Cytomegalovirus (CMV)	D003586	NA	1	Yes	pp50	P16790	VTEHDTLLY	71290	HLA-A1	PBMC	CD8	NA	NA	NA	NA	TRBV7-2	NA	TRBJ2-3	No	TGTGCCAGCAGCTTAACAGATACGCAGTATTTT	NA	28636589	NA	TRB	TRB	HomoSapiens	AVFDRKSDAK	EBNA4	EBV	812	TRBV28	TRBJ2-3	5	5	HLA-A*11:01	B2M	MHCI	https://www.10xgenomics.com/resources/application-notes/a-new-way-of-exploring-immunity-linking-highly-multiplexed-antigen-recognition-to-immune-repertoire-and-phenotype/#	0	HomoSapiens	TRB
124	CASSLTDTQYF	3	3	3	NA	Human	Pathogens	Cytomegalovirus (CMV)	D003586	NA	1	Yes	pp50	P16790	VTEHDTLLY	71290	HLA-A1	PBMC	CD8	NA	NA	NA	NA	TRBV7-2	NA	TRBJ2-3	No	TGTGCCAGCAGCTTAACAGATACGCAGTATTTT	NA	28636589	NA	TRB	TRB	HomoSapiens	AVFDRKSDAK	EBNA4	EBV	812	TRBV28	TRBJ2-3	5	5	HLA-A*11:01	B2M	MHCI	https://www.10xgenomics.com/resources/application-notes/a-new-way-of-exploring-immunity-linking-highly-multiplexed-antigen-recognition-to-immune-repertoire-and-phenotype/#	0	HomoSapiens	TRB
125	CASSLTDTQYF	3	3	3	NA	Human	Pathogens	Cytomegalovirus (CMV)	D003586	NA	1	Yes	pp50	P16790	VTEHDTLLY	71290	HLA-A1	PBMC	CD8	NA	NA	NA	NA	TRBV7-2	NA	TRBJ2-3	No	TGTGCCAGCAGCTTAACAGATACGCAGTATTTT	NA	28636589	NA	TRB	TRB	HomoSapiens	AVFDRKSDAK	EBNA4	EBV	812	TRBV28	TRBJ2-3	5	5	HLA-A*11:01	B2M	MHCI	https://www.10xgenomics.com/resources/application-notes/a-new-way-of-exploring-immunity-linking-highly-multiplexed-antigen-recognition-to-immune-repertoire-and-phenotype/#	0	HomoSapiens	TRB
126	CASSLTDTQYF	3	3	3	NA	Human	Pathogens	Cytomegalovirus (CMV)	D003586	NA	1	Yes	pp50	P16790	VTEHDTLLY	71290	HLA-A1	PBMC	CD8	NA	NA	NA	NA	TRBV7-2	NA	TRBJ2-3	No	TGTGCCAGCAGCTTAACAGATACGCAGTATTTT	NA	28636589	NA	TRB	TRB	HomoSapiens	AVFDRKSDAK	EBNA4	EBV	812	TRBV28	TRBJ2-3	5	5	HLA-A*11:01	B2M	MHCI	https://www.10xgenomics.com/resources/application-notes/a-new-way-of-exploring-immunity-linking-highly-multiplexed-antigen-recognition-to-immune-repertoire-and-phenotype/#	0	HomoSapiens	TRB
127	CASSLTDTQYF	3	3	3	NA	Human	Pathogens	Cytomegalovirus (CMV)	D003586	NA	1	Yes	pp50	P16790	VTEHDTLLY	71290	HLA-A1	PBMC	CD8	NA	NA	NA	NA	TRBV7-2	NA	TRBJ2-3	No	TGTGCCAGCAGCTTAACAGATACGCAGTATTTT	NA	28636589	NA	TRB	TRB	HomoSapiens	AVFDRKSDAK	EBNA4	EBV	812	TRBV28	TRBJ2-3	5	5	HLA-A*11:01	B2M	MHCI	https://www.10xgenomics.com/resources/application-notes/a-new-way-of-exploring-immunity-linking-highly-multiplexed-antigen-recognition-to-immune-repertoire-and-phenotype/#	0	HomoSapiens	TRB
128	CASSLTDTQYF	3	3	3	NA	Human	Pathogens	Cytomegalovirus (CMV)	D003586	NA	1	Yes	pp50	P16790	VTEHDTLLY	71290	HLA-A1	PBMC	CD8	NA	NA	NA	NA	TRBV7-2	NA	TRBJ2-3	No	TGTGCCAGCAGCTTAACAGATACGCAGTATTTT	NA	28636589	NA	TRB	TRB	HomoSapiens	AVFDRKSDAK	EBNA4	EBV	812	TRBV28	TRBJ2-3	5	5	HLA-A*11:01	B2M	MHCI	https://www.10xgenomics.com/resources/application-notes/a-new-way-of-exploring-immunity-linking-highly-multiplexed-antigen-recognition-to-immune-repertoire-and-phenotype/#	0	HomoSapiens	TRB
129	CASSLTDTQYF	3	3	3	NA	Human	Pathogens	Cytomegalovirus (CMV)	D003586	NA	1	Yes	pp50	P16790	VTEHDTLLY	71290	HLA-A1	PBMC	CD8	NA	NA	NA	NA	TRBV7-2	NA	TRBJ2-3	No	TGTGCCAGCAGCTTAACAGATACGCAGTATTTT	NA	28636589	NA	TRB	TRB	HomoSapiens	AVFDRKSDAK	EBNA4	EBV	812	TRBV28	TRBJ2-3	5	5	HLA-A*11:01	B2M	MHCI	https://www.10xgenomics.com/resources/application-notes/a-new-way-of-exploring-immunity-linking-highly-multiplexed-antigen-recognition-to-immune-repertoire-and-phenotype/#	0	HomoSapiens	TRB
130	CASSLTDTQYF	3	3	3	NA	Human	Pathogens	Cytomegalovirus (CMV)	D003586	NA	1	Yes	pp50	P16790	VTEHDTLLY	71290	HLA-A1	PBMC	CD8	NA	NA	NA	NA	TRBV7-2	NA	TRBJ2-3	No	TGTGCCAGCAGCTTAACAGATACGCAGTATTTT	NA	28636589	NA	TRB	TRB	HomoSapiens	AVFDRKSDAK	EBNA4	EBV	812	TRBV28	TRBJ2-3	5	5	HLA-A*11:01	B2M	MHCI	https://www.10xgenomics.com/resources/application-notes/a-new-way-of-exploring-immunity-linking-highly-multiplexed-antigen-recognition-to-immune-repertoire-and-phenotype/#	0	HomoSapiens	TRB
131	CASSLTDTQYF	3	3	3	NA	Human	Pathogens	Cytomegalovirus (CMV)	D003586	NA	1	Yes	pp50	P16790	VTEHDTLLY	71290	HLA-A1	PBMC	CD8	NA	NA	NA	NA	TRBV7-2	NA	TRBJ2-3	No	TGTGCCAGCAGCTTAACAGATACGCAGTATTTT	NA	28636589	NA	TRB	TRB	HomoSapiens	AVFDRKSDAK	EBNA4	EBV	812	TRBV28	TRBJ2-3	5	5	HLA-A*11:01	B2M	MHCI	https://www.10xgenomics.com/resources/application-notes/a-new-way-of-exploring-immunity-linking-highly-multiplexed-antigen-recognition-to-immune-repertoire-and-phenotype/#	0	HomoSapiens	TRB
132	CASSLTDTQYF	3	3	3	NA	Human	Pathogens	Cytomegalovirus (CMV)	D003586	NA	1	Yes	pp50	P16790	VTEHDTLLY	71290	HLA-A1	PBMC	CD8	NA	NA	NA	NA	TRBV7-2	NA	TRBJ2-3	No	TGTGCCAGCAGCTTAACAGATACGCAGTATTTT	NA	28636589	NA	TRB	TRB	HomoSapiens	AVFDRKSDAK	EBNA4	EBV	812	TRBV28	TRBJ2-3	5	5	HLA-A*11:01	B2M	MHCI	https://www.10xgenomics.com/resources/application-notes/a-new-way-of-exploring-immunity-linking-highly-multiplexed-antigen-recognition-to-immune-repertoire-and-phenotype/#	0	HomoSapiens	TRB
133	CASSLTDTQYF	3	3	3	NA	Human	Pathogens	Cytomegalovirus (CMV)	D003586	NA	1	Yes	pp50	P16790	VTEHDTLLY	71290	HLA-A1	PBMC	CD8	NA	NA	NA	NA	TRBV7-2	NA	TRBJ2-3	No	TGTGCCAGCAGCTTAACAGATACGCAGTATTTT	NA	28636589	NA	TRB	TRB	HomoSapiens	AVFDRKSDAK	EBNA4	EBV	812	TRBV28	TRBJ2-3	5	5	HLA-A*11:01	B2M	MHCI	https://www.10xgenomics.com/resources/application-notes/a-new-way-of-exploring-immunity-linking-highly-multiplexed-antigen-recognition-to-immune-repertoire-and-phenotype/#	0	HomoSapiens	TRB
134	CASSLTDTQYF	3	3	3	NA	Human	Pathogens	Cytomegalovirus (CMV)	D003586	NA	1	Yes	pp50	P16790	VTEHDTLLY	71290	HLA-A1	PBMC	CD8	NA	NA	NA	NA	TRBV7-2	NA	TRBJ2-3	No	TGTGCCAGCAGCTTAACAGATACGCAGTATTTT	NA	28636589	NA	TRB	TRB	HomoSapiens	AVFDRKSDAK	EBNA4	EBV	812	TRBV28	TRBJ2-3	5	5	HLA-A*11:01	B2M	MHCI	https://www.10xgenomics.com/resources/application-notes/a-new-way-of-exploring-immunity-linking-highly-multiplexed-antigen-recognition-to-immune-repertoire-and-phenotype/#	0	HomoSapiens	TRB
135	CASSLTDTQYF	3	3	3	NA	Human	Pathogens	Cytomegalovirus (CMV)	D003586	NA	1	Yes	pp50	P16790	VTEHDTLLY	71290	HLA-A1	PBMC	CD8	NA	NA	NA	NA	TRBV7-2	NA	TRBJ2-3	No	TGTGCCAGCAGCTTAACAGATACGCAGTATTTT	NA	28636589	NA	TRB	TRB	HomoSapiens	RAKFKQLL	BZLF1	EBV	6759	TRBV28	TRBJ2-3	5	5	HLA-B*08:01	B2M	MHCI	https://www.10xgenomics.com/resources/application-notes/a-new-way-of-exploring-immunity-linking-highly-multiplexed-antigen-recognition-to-immune-repertoire-and-phenotype/#	0	HomoSapiens	TRB
136	CASSLTDTQYF	3	3	3	NA	Human	Pathogens	Cytomegalovirus (CMV)	D003586	NA	1	Yes	pp50	P16790	VTEHDTLLY	71290	HLA-A1	PBMC	CD8	NA	NA	NA	NA	TRBV7-2	NA	TRBJ2-3	No	TGTGCCAGCAGCTTAACAGATACGCAGTATTTT	NA	28636589	NA	TRB	TRB	HomoSapiens	RAKFKQLL	BZLF1	EBV	6759	TRBV28	TRBJ2-3	5	5	HLA-B*08:01	B2M	MHCI	https://www.10xgenomics.com/resources/application-notes/a-new-way-of-exploring-immunity-linking-highly-multiplexed-antigen-recognition-to-immune-repertoire-and-phenotype/#	0	HomoSapiens	TRB
137	CASSLTDTQYF	3	3	3	NA	Human	Pathogens	Cytomegalovirus (CMV)	D003586	NA	1	Yes	pp50	P16790	VTEHDTLLY	71290	HLA-A1	PBMC	CD8	NA	NA	NA	NA	TRBV7-2	NA	TRBJ2-3	No	TGTGCCAGCAGCTTAACAGATACGCAGTATTTT	NA	28636589	NA	TRB	TRB	HomoSapiens	RAKFKQLL	BZLF1	EBV	6759	TRBV28	TRBJ2-3	5	5	HLA-B*08:01	B2M	MHCI	https://www.10xgenomics.com/resources/application-notes/a-new-way-of-exploring-immunity-linking-highly-multiplexed-antigen-recognition-to-immune-repertoire-and-phenotype/#	0	HomoSapiens	TRB
138	CASSLTDTQYF	3	3	3	NA	Human	Pathogens	Cytomegalovirus (CMV)	D003586	NA	1	Yes	pp50	P16790	VTEHDTLLY	71290	HLA-A1	PBMC	CD8	NA	NA	NA	NA	TRBV7-2	NA	TRBJ2-3	No	TGTGCCAGCAGCTTAACAGATACGCAGTATTTT	NA	28636589	NA	TRB	TRB	HomoSapiens	RAKFKQLL	BZLF1	EBV	6759	TRBV28	TRBJ2-3	5	5	HLA-B*08:01	B2M	MHCI	https://www.10xgenomics.com/resources/application-notes/a-new-way-of-exploring-immunity-linking-highly-multiplexed-antigen-recognition-to-immune-repertoire-and-phenotype/#	0	HomoSapiens	TRB
139	CASSLTDTQYF	3	3	3	NA	Human	Pathogens	Cytomegalovirus (CMV)	D003586	NA	1	Yes	pp50	P16790	VTEHDTLLY	71290	HLA-A1	PBMC	CD8	NA	NA	NA	NA	TRBV7-2	NA	TRBJ2-3	No	TGTGCCAGCAGCTTAACAGATACGCAGTATTTT	NA	28636589	NA	TRB	TRB	HomoSapiens	RAKFKQLL	BZLF1	EBV	6759	TRBV28	TRBJ2-3	5	5	HLA-B*08:01	B2M	MHCI	https://www.10xgenomics.com/resources/application-notes/a-new-way-of-exploring-immunity-linking-highly-multiplexed-antigen-recognition-to-immune-repertoire-and-phenotype/#	0	HomoSapiens	TRB
140	CASSLTDTQYF	3	3	3	NA	Human	Pathogens	Cytomegalovirus (CMV)	D003586	NA	1	Yes	pp50	P16790	VTEHDTLLY	71290	HLA-A1	PBMC	CD8	NA	NA	NA	NA	TRBV7-2	NA	TRBJ2-3	No	TGTGCCAGCAGCTTAACAGATACGCAGTATTTT	NA	28636589	NA	TRB	TRB	HomoSapiens	RAKFKQLL	BZLF1	EBV	6759	TRBV28	TRBJ2-3	5	5	HLA-B*08:01	B2M	MHCI	https://www.10xgenomics.com/resources/application-notes/a-new-way-of-exploring-immunity-linking-highly-multiplexed-antigen-recognition-to-immune-repertoire-and-phenotype/#	0	HomoSapiens	TRB
141	CASSLTDTQYF	3	3	3	NA	Human	Pathogens	Cytomegalovirus (CMV)	D003586	NA	1	Yes	pp50	P16790	VTEHDTLLY	71290	HLA-A1	PBMC	CD8	NA	NA	NA	NA	TRBV7-2	NA	TRBJ2-3	No	TGTGCCAGCAGCTTAACAGATACGCAGTATTTT	NA	28636589	NA	TRB	TRB	HomoSapiens	RAKFKQLL	BZLF1	EBV	6759	TRBV28	TRBJ2-3	5	5	HLA-B*08:01	B2M	MHCI	https://www.10xgenomics.com/resources/application-notes/a-new-way-of-exploring-immunity-linking-highly-multiplexed-antigen-recognition-to-immune-repertoire-and-phenotype/#	0	HomoSapiens	TRB
142	CASSLTDTQYF	3	3	3	NA	Human	Pathogens	Cytomegalovirus (CMV)	D003586	NA	1	Yes	pp50	P16790	VTEHDTLLY	71290	HLA-A1	PBMC	CD8	NA	NA	NA	NA	TRBV7-2	NA	TRBJ2-3	No	TGTGCCAGCAGCTTAACAGATACGCAGTATTTT	NA	28636589	NA	TRB	TRB	HomoSapiens	RAKFKQLL	BZLF1	EBV	6759	TRBV28	TRBJ2-3	5	5	HLA-B*08:01	B2M	MHCI	https://www.10xgenomics.com/resources/application-notes/a-new-way-of-exploring-immunity-linking-highly-multiplexed-antigen-recognition-to-immune-repertoire-and-phenotype/#	0	HomoSapiens	TRB
143	CASSLTDTQYF	3	3	3	NA	Human	Pathogens	Cytomegalovirus (CMV)	D003586	NA	1	Yes	pp50	P16790	VTEHDTLLY	71290	HLA-A1	PBMC	CD8	NA	NA	NA	NA	TRBV7-2	NA	TRBJ2-3	No	TGTGCCAGCAGCTTAACAGATACGCAGTATTTT	NA	28636589	NA	TRB	TRB	HomoSapiens	RAKFKQLL	BZLF1	EBV	6759	TRBV28	TRBJ2-3	5	5	HLA-B*08:01	B2M	MHCI	https://www.10xgenomics.com/resources/application-notes/a-new-way-of-exploring-immunity-linking-highly-multiplexed-antigen-recognition-to-immune-repertoire-and-phenotype/#	0	HomoSapiens	TRB
144	CASSLTDTQYF	3	3	3	NA	Human	Pathogens	Cytomegalovirus (CMV)	D003586	NA	1	Yes	pp50	P16790	VTEHDTLLY	71290	HLA-A1	PBMC	CD8	NA	NA	NA	NA	TRBV7-2	NA	TRBJ2-3	No	TGTGCCAGCAGCTTAACAGATACGCAGTATTTT	NA	28636589	NA	TRB	TRB	HomoSapiens	RAKFKQLL	BZLF1	EBV	6759	TRBV28	TRBJ2-3	5	5	HLA-B*08:01	B2M	MHCI	https://www.10xgenomics.com/resources/application-notes/a-new-way-of-exploring-immunity-linking-highly-multiplexed-antigen-recognition-to-immune-repertoire-and-phenotype/#	0	HomoSapiens	TRB
145	CASSLTDTQYF	3	3	3	NA	Human	Pathogens	Cytomegalovirus (CMV)	D003586	NA	1	Yes	pp50	P16790	VTEHDTLLY	71290	HLA-A1	PBMC	CD8	NA	NA	NA	NA	TRBV7-2	NA	TRBJ2-3	No	TGTGCCAGCAGCTTAACAGATACGCAGTATTTT	NA	28636589	NA	TRB	TRB	HomoSapiens	RAKFKQLL	BZLF1	EBV	6759	TRBV28	TRBJ2-3	5	5	HLA-B*08:01	B2M	MHCI	https://www.10xgenomics.com/resources/application-notes/a-new-way-of-exploring-immunity-linking-highly-multiplexed-antigen-recognition-to-immune-repertoire-and-phenotype/#	0	HomoSapiens	TRB
146	CASSLTDTQYF	3	3	3	NA	Human	Pathogens	Cytomegalovirus (CMV)	D003586	NA	1	Yes	pp50	P16790	VTEHDTLLY	71290	HLA-A1	PBMC	CD8	NA	NA	NA	NA	TRBV7-2	NA	TRBJ2-3	No	TGTGCCAGCAGCTTAACAGATACGCAGTATTTT	NA	28636589	NA	TRB	TRB	HomoSapiens	RAKFKQLL	BZLF1	EBV	6759	TRBV28	TRBJ2-3	5	5	HLA-B*08:01	B2M	MHCI	https://www.10xgenomics.com/resources/application-notes/a-new-way-of-exploring-immunity-linking-highly-multiplexed-antigen-recognition-to-immune-repertoire-and-phenotype/#	0	HomoSapiens	TRB
147	CASSLTDTQYF	3	3	3	NA	Human	Pathogens	Cytomegalovirus (CMV)	D003586	NA	1	Yes	pp50	P16790	VTEHDTLLY	71290	HLA-A1	PBMC	CD8	NA	NA	NA	NA	TRBV7-2	NA	TRBJ2-3	No	TGTGCCAGCAGCTTAACAGATACGCAGTATTTT	NA	28636589	NA	TRB	TRB	HomoSapiens	RAKFKQLL	BZLF1	EBV	6759	TRBV28	TRBJ2-3	5	5	HLA-B*08:01	B2M	MHCI	https://www.10xgenomics.com/resources/application-notes/a-new-way-of-exploring-immunity-linking-highly-multiplexed-antigen-recognition-to-immune-repertoire-and-phenotype/#	0	HomoSapiens	TRB
148	CASSLTDTQYF	3	3	3	NA	Human	Pathogens	Cytomegalovirus (CMV)	D003586	NA	1	Yes	pp50	P16790	VTEHDTLLY	71290	HLA-A1	PBMC	CD8	NA	NA	NA	NA	TRBV7-2	NA	TRBJ2-3	No	TGTGCCAGCAGCTTAACAGATACGCAGTATTTT	NA	28636589	NA	TRB	TRB	HomoSapiens	RAKFKQLL	BZLF1	EBV	6759	TRBV28	TRBJ2-3	5	5	HLA-B*08:01	B2M	MHCI	https://www.10xgenomics.com/resources/application-notes/a-new-way-of-exploring-immunity-linking-highly-multiplexed-antigen-recognition-to-immune-repertoire-and-phenotype/#	0	HomoSapiens	TRB
149	CASSLTDTQYF	3	3	3	NA	Human	Pathogens	Cytomegalovirus (CMV)	D003586	NA	1	Yes	pp50	P16790	VTEHDTLLY	71290	HLA-A1	PBMC	CD8	NA	NA	NA	NA	TRBV7-2	NA	TRBJ2-3	No	TGTGCCAGCAGCTTAACAGATACGCAGTATTTT	NA	28636589	NA	TRB	TRB	HomoSapiens	RAKFKQLL	BZLF1	EBV	6759	TRBV28	TRBJ2-3	5	5	HLA-B*08:01	B2M	MHCI	https://www.10xgenomics.com/resources/application-notes/a-new-way-of-exploring-immunity-linking-highly-multiplexed-antigen-recognition-to-immune-repertoire-and-phenotype/#	0	HomoSapiens	TRB
150	CASSLTDTQYF	3	3	3	NA	Human	Pathogens	Cytomegalovirus (CMV)	D003586	NA	1	Yes	pp50	P16790	VTEHDTLLY	71290	HLA-A1	PBMC	CD8	NA	NA	NA	NA	TRBV7-2	NA	TRBJ2-3	No	TGTGCCAGCAGCTTAACAGATACGCAGTATTTT	NA	28636589	NA	TRB	TRB	HomoSapiens	RAKFKQLL	BZLF1	EBV	6759	TRBV28	TRBJ2-3	5	5	HLA-B*08:01	B2M	MHCI	https://www.10xgenomics.com/resources/application-notes/a-new-way-of-exploring-immunity-linking-highly-multiplexed-antigen-recognition-to-immune-repertoire-and-phenotype/#	0	HomoSapiens	TRB
151	CASSLTDTQYF	3	3	3	NA	Human	Pathogens	Cytomegalovirus (CMV)	D003586	NA	1	Yes	pp50	P16790	VTEHDTLLY	71290	HLA-A1	PBMC	CD8	NA	NA	NA	NA	TRBV7-2	NA	TRBJ2-3	No	TGTGCCAGCAGCTTAACAGATACGCAGTATTTT	NA	28636589	NA	TRB	TRB	HomoSapiens	RAKFKQLL	BZLF1	EBV	6759	TRBV28	TRBJ2-3	5	5	HLA-B*08:01	B2M	MHCI	https://www.10xgenomics.com/resources/application-notes/a-new-way-of-exploring-immunity-linking-highly-multiplexed-antigen-recognition-to-immune-repertoire-and-phenotype/#	0	HomoSapiens	TRB
152	CASSLTDTQYF	3	3	3	NA	Human	Pathogens	Cytomegalovirus (CMV)	D003586	NA	1	Yes	pp50	P16790	VTEHDTLLY	71290	HLA-A1	PBMC	CD8	NA	NA	NA	NA	TRBV7-2	NA	TRBJ2-3	No	TGTGCCAGCAGCTTAACAGATACGCAGTATTTT	NA	28636589	NA	TRB	TRB	HomoSapiens	RAKFKQLL	BZLF1	EBV	6759	TRBV28	TRBJ2-3	5	5	HLA-B*08:01	B2M	MHCI	https://www.10xgenomics.com/resources/application-notes/a-new-way-of-exploring-immunity-linking-highly-multiplexed-antigen-recognition-to-immune-repertoire-and-phenotype/#	0	HomoSapiens	TRB
153	CASSLTDTQYF	3	3	3	NA	Human	Pathogens	Cytomegalovirus (CMV)	D003586	NA	1	Yes	pp50	P16790	VTEHDTLLY	71290	HLA-A1	PBMC	CD8	NA	NA	NA	NA	TRBV7-2	NA	TRBJ2-3	No	TGTGCCAGCAGCTTAACAGATACGCAGTATTTT	NA	28636589	NA	TRB	TRB	HomoSapiens	RAKFKQLL	BZLF1	EBV	6759	TRBV28	TRBJ2-3	5	5	HLA-B*08:01	B2M	MHCI	https://www.10xgenomics.com/resources/application-notes/a-new-way-of-exploring-immunity-linking-highly-multiplexed-antigen-recognition-to-immune-repertoire-and-phenotype/#	0	HomoSapiens	TRB
154	CASSLTDTQYF	3	3	3	NA	Human	Pathogens	Cytomegalovirus (CMV)	D003586	NA	1	Yes	pp50	P16790	VTEHDTLLY	71290	HLA-A1	PBMC	CD8	NA	NA	NA	NA	TRBV7-2	NA	TRBJ2-3	No	TGTGCCAGCAGCTTAACAGATACGCAGTATTTT	NA	28636589	NA	TRB	TRB	HomoSapiens	RAKFKQLL	BZLF1	EBV	6759	TRBV28	TRBJ2-3	5	5	HLA-B*08:01	B2M	MHCI	https://www.10xgenomics.com/resources/application-notes/a-new-way-of-exploring-immunity-linking-highly-multiplexed-antigen-recognition-to-immune-repertoire-and-phenotype/#	0	HomoSapiens	TRB
155	CASSLTDTQYF	3	3	3	NA	Human	Pathogens	Cytomegalovirus (CMV)	D003586	NA	1	Yes	pp50	P16790	VTEHDTLLY	71290	HLA-A1	PBMC	CD8	NA	NA	NA	NA	TRBV7-2	NA	TRBJ2-3	No	TGTGCCAGCAGCTTAACAGATACGCAGTATTTT	NA	28636589	NA	TRB	TRB	HomoSapiens	RAKFKQLL	BZLF1	EBV	6759	TRBV28	TRBJ2-3	5	5	HLA-B*08:01	B2M	MHCI	https://www.10xgenomics.com/resources/application-notes/a-new-way-of-exploring-immunity-linking-highly-multiplexed-antigen-recognition-to-immune-repertoire-and-phenotype/#	0	HomoSapiens	TRB
156	CASSLTDTQYF	3	3	3	NA	Human	Pathogens	Cytomegalovirus (CMV)	D003586	NA	1	Yes	pp50	P16790	VTEHDTLLY	71290	HLA-A1	PBMC	CD8	NA	NA	NA	NA	TRBV7-2	NA	TRBJ2-3	No	TGTGCCAGCAGCTTAACAGATACGCAGTATTTT	NA	28636589	NA	TRB	TRB	HomoSapiens	RAKFKQLL	BZLF1	EBV	6759	TRBV28	TRBJ2-3	5	5	HLA-B*08:01	B2M	MHCI	https://www.10xgenomics.com/resources/application-notes/a-new-way-of-exploring-immunity-linking-highly-multiplexed-antigen-recognition-to-immune-repertoire-and-phenotype/#	0	HomoSapiens	TRB
157	CASSLTDTQYF	3	3	3	NA	Human	Pathogens	Cytomegalovirus (CMV)	D003586	NA	1	Yes	pp50	P16790	VTEHDTLLY	71290	HLA-A1	PBMC	CD8	NA	NA	NA	NA	TRBV7-2	NA	TRBJ2-3	No	TGTGCCAGCAGCTTAACAGATACGCAGTATTTT	NA	28636589	NA	TRB	TRB	HomoSapiens	RAKFKQLL	BZLF1	EBV	6759	TRBV28	TRBJ2-3	5	5	HLA-B*08:01	B2M	MHCI	https://www.10xgenomics.com/resources/application-notes/a-new-way-of-exploring-immunity-linking-highly-multiplexed-antigen-recognition-to-immune-repertoire-and-phenotype/#	0	HomoSapiens	TRB
158	CASSLTDTQYF	3	3	3	NA	Human	Pathogens	Cytomegalovirus (CMV)	D003586	NA	1	Yes	pp50	P16790	VTEHDTLLY	71290	HLA-A1	PBMC	CD8	NA	NA	NA	NA	TRBV7-2	NA	TRBJ2-3	No	TGTGCCAGCAGCTTAACAGATACGCAGTATTTT	NA	28636589	NA	TRB	TRB	HomoSapiens	RAKFKQLL	BZLF1	EBV	6759	TRBV28	TRBJ2-3	5	5	HLA-B*08:01	B2M	MHCI	https://www.10xgenomics.com/resources/application-notes/a-new-way-of-exploring-immunity-linking-highly-multiplexed-antigen-recognition-to-immune-repertoire-and-phenotype/#	0	HomoSapiens	TRB
159	CASSLTDTQYF	3	3	3	NA	Human	Pathogens	Cytomegalovirus (CMV)	D003586	NA	1	Yes	pp50	P16790	VTEHDTLLY	71290	HLA-A1	PBMC	CD8	NA	NA	NA	NA	TRBV7-2	NA	TRBJ2-3	No	TGTGCCAGCAGCTTAACAGATACGCAGTATTTT	NA	28636589	NA	TRB	TRB	HomoSapiens	VTEHDTLLY	pp50	CMV	0	TRBV7-2	TRBJ2-3	5	5	HLA-A*01:01	B2M	MHCI	PMID:28636589	0	HomoSapiens	TRB
160	CASSLTDTQYF	3	3	3	NA	Human	Pathogens	Cytomegalovirus (CMV)	D003586	NA	1	Yes	pp50	P16790	VTEHDTLLY	71290	HLA-A1	PBMC	CD8	NA	NA	NA	NA	TRBV7-2	NA	TRBJ2-3	No	TGTGCCAGCAGCTTAACAGATACGCAGTATTTT	NA	28636589	NA	TRB	TRB	HomoSapiens	VTEHDTLLY	pp50	CMV	0	TRBV7-2	TRBJ2-3	5	5	HLA-A*01:01	B2M	MHCI	PMID:28636589	0	HomoSapiens	TRB
161	CASSLTDTQYF	3	3	3	NA	Human	Pathogens	Cytomegalovirus (CMV)	D003586	NA	1	Yes	pp50	P16790	VTEHDTLLY	71290	HLA-A1	PBMC	CD8	NA	NA	NA	NA	TRBV7-2	NA	TRBJ2-3	No	TGTGCCAGCAGCTTAACAGATACGCAGTATTTT	NA	28636589	NA	TRB	TRB	HomoSapiens	VTEHDTLLY	pp50	CMV	0	TRBV7-2	TRBJ2-3	5	5	HLA-A*01:01	B2M	MHCI	PMID:28636589	0	HomoSapiens	TRB
162	CASSLTDTQYF	3	3	3	NA	Human	Pathogens	Cytomegalovirus (CMV)	D003586	NA	1	Yes	pp50	P16790	VTEHDTLLY	71290	HLA-A1	PBMC	CD8	NA	NA	NA	NA	TRBV7-2	NA	TRBJ2-3	No	TGTGCCAGCAGCTTAACAGATACGCAGTATTTT	NA	28636589	NA	TRB	TRB	HomoSapiens	VTEHDTLLY	pp50	CMV	0	TRBV7-2	TRBJ2-3	5	5	HLA-A*01:01	B2M	MHCI	PMID:28636589	0	HomoSapiens	TRB
163	CASSLTDTQYF	3	3	3	NA	Human	Pathogens	Cytomegalovirus (CMV)	D003586	NA	1	Yes	pp50	P16790	VTEHDTLLY	71290	HLA-A1	PBMC	CD8	NA	NA	NA	NA	TRBV7-2	NA	TRBJ2-3	No	TGTGCCAGCAGCTTAACAGATACGCAGTATTTT	NA	28636589	NA	TRB	TRB	HomoSapiens	VTEHDTLLY	pp50	CMV	0	TRBV7-2	TRBJ2-3	5	5	HLA-A*01:01	B2M	MHCI	PMID:28636589	0	HomoSapiens	TRB
164	CASSLTDTQYF	3	3	3	NA	Human	Pathogens	Cytomegalovirus (CMV)	D003586	NA	1	Yes	pp50	P16790	VTEHDTLLY	71290	HLA-A1	PBMC	CD8	NA	NA	NA	NA	TRBV7-2	NA	TRBJ2-3	No	TGTGCCAGCAGCTTAACAGATACGCAGTATTTT	NA	28636589	NA	TRB	TRB	HomoSapiens	VTEHDTLLY	pp50	CMV	0	TRBV7-2	TRBJ2-3	5	5	HLA-A*01:01	B2M	MHCI	PMID:28636589	0	HomoSapiens	TRB
165	CASSLTDTQYF	3	3	3	NA	Human	Pathogens	Cytomegalovirus (CMV)	D003586	NA	1	Yes	pp50	P16790	VTEHDTLLY	71290	HLA-A1	PBMC	CD8	NA	NA	NA	NA	TRBV7-2	NA	TRBJ2-3	No	TGTGCCAGCAGCTTAACAGATACGCAGTATTTT	NA	28636589	NA	TRB	TRB	HomoSapiens	VTEHDTLLY	pp50	CMV	0	TRBV7-2	TRBJ2-3	5	5	HLA-A*01:01	B2M	MHCI	PMID:28636589	0	HomoSapiens	TRB
166	CASSLTDTQYF	3	3	3	NA	Human	Pathogens	Cytomegalovirus (CMV)	D003586	NA	1	Yes	pp50	P16790	VTEHDTLLY	71290	HLA-A1	PBMC	CD8	NA	NA	NA	NA	TRBV7-2	NA	TRBJ2-3	No	TGTGCCAGCAGCTTAACAGATACGCAGTATTTT	NA	28636589	NA	TRB	TRB	HomoSapiens	VTEHDTLLY	pp50	CMV	0	TRBV7-2	TRBJ2-3	5	5	HLA-A*01:01	B2M	MHCI	PMID:28636589	0	HomoSapiens	TRB
167	CASSLTDTQYF	3	3	3	NA	Human	Pathogens	Cytomegalovirus (CMV)	D003586	NA	1	Yes	pp50	P16790	VTEHDTLLY	71290	HLA-A1	PBMC	CD8	NA	NA	NA	NA	TRBV7-2	NA	TRBJ2-3	No	TGTGCCAGCAGCTTAACAGATACGCAGTATTTT	NA	28636589	NA	TRB	TRB	HomoSapiens	VTEHDTLLY	pp50	CMV	0	TRBV7-2	TRBJ2-3	5	5	HLA-A*01:01	B2M	MHCI	PMID:28636589	0	HomoSapiens	TRB
168	CASSLTDTQYF	3	3	3	NA	Human	Pathogens	Cytomegalovirus (CMV)	D003586	NA	1	Yes	pp50	P16790	VTEHDTLLY	71290	HLA-A1	PBMC	CD8	NA	NA	NA	NA	TRBV7-2	NA	TRBJ2-3	No	TGTGCCAGCAGCTTAACAGATACGCAGTATTTT	NA	28636589	NA	TRB	TRB	HomoSapiens	VTEHDTLLY	pp50	CMV	0	TRBV7-2	TRBJ2-3	5	5	HLA-A*01:01	B2M	MHCI	PMID:28636589	0	HomoSapiens	TRB
169	CASSLTDTQYF	3	3	3	NA	Human	Pathogens	Cytomegalovirus (CMV)	D003586	NA	1	Yes	pp50	P16790	VTEHDTLLY	71290	HLA-A1	PBMC	CD8	NA	NA	NA	NA	TRBV7-2	NA	TRBJ2-3	No	TGTGCCAGCAGCTTAACAGATACGCAGTATTTT	NA	28636589	NA	TRB	TRB	HomoSapiens	VTEHDTLLY	pp50	CMV	0	TRBV7-2	TRBJ2-3	5	5	HLA-A*01:01	B2M	MHCI	PMID:28636589	0	HomoSapiens	TRB
170	CASSLTDTQYF	3	3	3	NA	Human	Pathogens	Cytomegalovirus (CMV)	D003586	NA	1	Yes	pp50	P16790	VTEHDTLLY	71290	HLA-A1	PBMC	CD8	NA	NA	NA	NA	TRBV7-2	NA	TRBJ2-3	No	TGTGCCAGCAGCTTAACAGATACGCAGTATTTT	NA	28636589	NA	TRB	TRB	HomoSapiens	VTEHDTLLY	pp50	CMV	0	TRBV7-2	TRBJ2-3	5	5	HLA-A*01:01	B2M	MHCI	PMID:28636589	0	HomoSapiens	TRB
171	CASSLTDTQYF	3	3	3	NA	Human	Pathogens	Cytomegalovirus (CMV)	D003586	NA	1	Yes	pp50	P16790	VTEHDTLLY	71290	HLA-A1	PBMC	CD8	NA	NA	NA	NA	TRBV7-2	NA	TRBJ2-3	No	TGTGCCAGCAGCTTAACAGATACGCAGTATTTT	NA	28636589	NA	TRB	TRB	HomoSapiens	VTEHDTLLY	pp50	CMV	0	TRBV7-2	TRBJ2-3	5	5	HLA-A*01:01	B2M	MHCI	PMID:28636589	0	HomoSapiens	TRB
172	CASSLTDTQYF	3	3	3	NA	Human	Pathogens	Cytomegalovirus (CMV)	D003586	NA	1	Yes	pp50	P16790	VTEHDTLLY	71290	HLA-A1	PBMC	CD8	NA	NA	NA	NA	TRBV7-2	NA	TRBJ2-3	No	TGTGCCAGCAGCTTAACAGATACGCAGTATTTT	NA	28636589	NA	TRB	TRB	HomoSapiens	VTEHDTLLY	pp50	CMV	0	TRBV7-2	TRBJ2-3	5	5	HLA-A*01:01	B2M	MHCI	PMID:28636589	0	HomoSapiens	TRB
173	CASSLTDTQYF	3	3	3	NA	Human	Pathogens	Cytomegalovirus (CMV)	D003586	NA	1	Yes	pp50	P16790	VTEHDTLLY	71290	HLA-A1	PBMC	CD8	NA	NA	NA	NA	TRBV7-2	NA	TRBJ2-3	No	TGTGCCAGCAGCTTAACAGATACGCAGTATTTT	NA	28636589	NA	TRB	TRB	HomoSapiens	VTEHDTLLY	pp50	CMV	0	TRBV7-2	TRBJ2-3	5	5	HLA-A*01:01	B2M	MHCI	PMID:28636589	0	HomoSapiens	TRB
174	CASSLTDTQYF	3	3	3	NA	Human	Pathogens	Cytomegalovirus (CMV)	D003586	NA	1	Yes	pp50	P16790	VTEHDTLLY	71290	HLA-A1	PBMC	CD8	NA	NA	NA	NA	TRBV7-2	NA	TRBJ2-3	No	TGTGCCAGCAGCTTAACAGATACGCAGTATTTT	NA	28636589	NA	TRB	TRB	HomoSapiens	VTEHDTLLY	pp50	CMV	0	TRBV7-2	TRBJ2-3	5	5	HLA-A*01:01	B2M	MHCI	PMID:28636589	0	HomoSapiens	TRB
175	CASSLTDTQYF	3	3	3	NA	Human	Pathogens	Cytomegalovirus (CMV)	D003586	NA	1	Yes	pp50	P16790	VTEHDTLLY	71290	HLA-A1	PBMC	CD8	NA	NA	NA	NA	TRBV7-2	NA	TRBJ2-3	No	TGTGCCAGCAGCTTAACAGATACGCAGTATTTT	NA	28636589	NA	TRB	TRB	HomoSapiens	VTEHDTLLY	pp50	CMV	0	TRBV7-2	TRBJ2-3	5	5	HLA-A*01:01	B2M	MHCI	PMID:28636589	0	HomoSapiens	TRB
176	CASSLTDTQYF	3	3	3	NA	Human	Pathogens	Cytomegalovirus (CMV)	D003586	NA	1	Yes	pp50	P16790	VTEHDTLLY	71290	HLA-A1	PBMC	CD8	NA	NA	NA	NA	TRBV7-2	NA	TRBJ2-3	No	TGTGCCAGCAGCTTAACAGATACGCAGTATTTT	NA	28636589	NA	TRB	TRB	HomoSapiens	VTEHDTLLY	pp50	CMV	0	TRBV7-2	TRBJ2-3	5	5	HLA-A*01:01	B2M	MHCI	PMID:28636589	0	HomoSapiens	TRB
177	CASSLTDTQYF	3	3	3	NA	Human	Pathogens	Cytomegalovirus (CMV)	D003586	NA	1	Yes	pp50	P16790	VTEHDTLLY	71290	HLA-A1	PBMC	CD8	NA	NA	NA	NA	TRBV7-2	NA	TRBJ2-3	No	TGTGCCAGCAGCTTAACAGATACGCAGTATTTT	NA	28636589	NA	TRB	TRB	HomoSapiens	VTEHDTLLY	pp50	CMV	0	TRBV7-2	TRBJ2-3	5	5	HLA-A*01:01	B2M	MHCI	PMID:28636589	0	HomoSapiens	TRB
178	CASSLTDTQYF	3	3	3	NA	Human	Pathogens	Cytomegalovirus (CMV)	D003586	NA	1	Yes	pp50	P16790	VTEHDTLLY	71290	HLA-A1	PBMC	CD8	NA	NA	NA	NA	TRBV7-2	NA	TRBJ2-3	No	TGTGCCAGCAGCTTAACAGATACGCAGTATTTT	NA	28636589	NA	TRB	TRB	HomoSapiens	VTEHDTLLY	pp50	CMV	0	TRBV7-2	TRBJ2-3	5	5	HLA-A*01:01	B2M	MHCI	PMID:28636589	0	HomoSapiens	TRB
179	CASSLTDTQYF	3	3	3	NA	Human	Pathogens	Cytomegalovirus (CMV)	D003586	NA	1	Yes	pp50	P16790	VTEHDTLLY	71290	HLA-A1	PBMC	CD8	NA	NA	NA	NA	TRBV7-2	NA	TRBJ2-3	No	TGTGCCAGCAGCTTAACAGATACGCAGTATTTT	NA	28636589	NA	TRB	TRB	HomoSapiens	VTEHDTLLY	pp50	CMV	0	TRBV7-2	TRBJ2-3	5	5	HLA-A*01:01	B2M	MHCI	PMID:28636589	0	HomoSapiens	TRB
180	CASSLTDTQYF	3	3	3	NA	Human	Pathogens	Cytomegalovirus (CMV)	D003586	NA	1	Yes	pp50	P16790	VTEHDTLLY	71290	HLA-A1	PBMC	CD8	NA	NA	NA	NA	TRBV7-2	NA	TRBJ2-3	No	TGTGCCAGCAGCTTAACAGATACGCAGTATTTT	NA	28636589	NA	TRB	TRB	HomoSapiens	VTEHDTLLY	pp50	CMV	0	TRBV7-2	TRBJ2-3	5	5	HLA-A*01:01	B2M	MHCI	PMID:28636589	0	HomoSapiens	TRB
181	CASSLTDTQYF	3	3	3	NA	Human	Pathogens	Cytomegalovirus (CMV)	D003586	NA	1	Yes	pp50	P16790	VTEHDTLLY	71290	HLA-A1	PBMC	CD8	NA	NA	NA	NA	TRBV7-2	NA	TRBJ2-3	No	TGTGCCAGCAGCTTAACAGATACGCAGTATTTT	NA	28636589	NA	TRB	TRB	HomoSapiens	VTEHDTLLY	pp50	CMV	0	TRBV7-2	TRBJ2-3	5	5	HLA-A*01:01	B2M	MHCI	PMID:28636589	0	HomoSapiens	TRB
182	CASSLTDTQYF	3	3	3	NA	Human	Pathogens	Cytomegalovirus (CMV)	D003586	NA	1	Yes	pp50	P16790	VTEHDTLLY	71290	HLA-A1	PBMC	CD8	NA	NA	NA	NA	TRBV7-2	NA	TRBJ2-3	No	TGTGCCAGCAGCTTAACAGATACGCAGTATTTT	NA	28636589	NA	TRB	TRB	HomoSapiens	VTEHDTLLY	pp50	CMV	0	TRBV7-2	TRBJ2-3	5	5	HLA-A*01:01	B2M	MHCI	PMID:28636589	0	HomoSapiens	TRB
183	CASRSGTGNTGELFF	NA	1	NA	NA	NA	NA	NA	NA	NA	NA	NA	NA	NA	NA	NA	NA	NA	NA	NA	NA	NA	NA	NA	NA	NA	NA	NA	NA	NA	NA	NA	NA	NA	NA	NA	NA	NA	NA	NA	NA	NA	NA	NA	NA	NA	NA	NA	NA
184	CASSASYEQYF	NA	1	1	NA	NA	NA	NA	NA	NA	NA	NA	NA	NA	NA	NA	NA	NA	NA	NA	NA	NA	NA	NA	NA	NA	NA	NA	NA	NA	NA	NA	TRB	HomoSapiens	KLGGALQAK	IE1	CMV	2606	TRBV7-2	TRBJ2-7	4	5	HLA-A*03:01	B2M	MHCI	https://www.10xgenomics.com/resources/application-notes/a-new-way-of-exploring-immunity-linking-highly-multiplexed-antigen-recognition-to-immune-repertoire-and-phenotype/#	0	HomoSapiens	TRB
185	CASSASYEQYF	NA	1	1	NA	NA	NA	NA	NA	NA	NA	NA	NA	NA	NA	NA	NA	NA	NA	NA	NA	NA	NA	NA	NA	NA	NA	NA	NA	NA	NA	NA	TRB	HomoSapiens	NLVPMVATV	pp65	CMV	0	TRBV7-3	TRBJ2-7	4	5	HLA-A*02	B2M	MHCI	PMID:28423320	0	HomoSapiens	TRB
186	CASSEAGSGANVLTF	NA	NA	1	NA	NA	NA	NA	NA	NA	NA	NA	NA	NA	NA	NA	NA	NA	NA	NA	NA	NA	NA	NA	NA	NA	NA	NA	NA	NA	NA	NA	TRB	HomoSapiens	KLGGALQAK	IE1	CMV	20648	TRBV25-1	TRBJ2-6	5	7	HLA-A*03:01	B2M	MHCI	https://www.10xgenomics.com/resources/application-notes/a-new-way-of-exploring-immunity-linking-highly-multiplexed-antigen-recognition-to-immune-repertoire-and-phenotype/#	0	HomoSapiens	TRB
187	CASSETSGSYNEQFF	NA	1	NA	NA	NA	NA	NA	NA	NA	NA	NA	NA	NA	NA	NA	NA	NA	NA	NA	NA	NA	NA	NA	NA	NA	NA	NA	NA	NA	NA	NA	NA	NA	NA	NA	NA	NA	NA	NA	NA	NA	NA	NA	NA	NA	NA	NA	NA
188	CASSFSGANVLTF	NA	NA	1	NA	NA	NA	NA	NA	NA	NA	NA	NA	NA	NA	NA	NA	NA	NA	NA	NA	NA	NA	NA	NA	NA	NA	NA	NA	NA	NA	NA	TRB	HomoSapiens	AVFDRKSDAK	EBNA4	EBV	1098	TRBV27	TRBJ2-6	4	5	HLA-A*11:01	B2M	MHCI	https://www.10xgenomics.com/resources/application-notes/a-new-way-of-exploring-immunity-linking-highly-multiplexed-antigen-recognition-to-immune-repertoire-and-phenotype/#	0	HomoSapiens	TRB
189	CASSFSGANVLTF	NA	NA	1	NA	NA	NA	NA	NA	NA	NA	NA	NA	NA	NA	NA	NA	NA	NA	NA	NA	NA	NA	NA	NA	NA	NA	NA	NA	NA	NA	NA	TRB	HomoSapiens	KLGGALQAK	IE1	CMV	18829	TRBV27	TRBJ2-6	4	5	HLA-A*03:01	B2M	MHCI	https://www.10xgenomics.com/resources/application-notes/a-new-way-of-exploring-immunity-linking-highly-multiplexed-antigen-recognition-to-immune-repertoire-and-phenotype/#	0	HomoSapiens	TRB
190	CASSIRESTDTQYF	NA	NA	1	NA	NA	NA	NA	NA	NA	NA	NA	NA	NA	NA	NA	NA	NA	NA	NA	NA	NA	NA	NA	NA	NA	NA	NA	NA	NA	NA	NA	TRB	HomoSapiens	AVFDRKSDAK	EBNA4	EBV	388	TRBV19	TRBJ2-3	5	7	HLA-A*11:01	B2M	MHCI	https://www.10xgenomics.com/resources/application-notes/a-new-way-of-exploring-immunity-linking-highly-multiplexed-antigen-recognition-to-immune-repertoire-and-phenotype/#	0	HomoSapiens	TRB
191	CASSLDANYGYTF	NA	1	NA	NA	NA	NA	NA	NA	NA	NA	NA	NA	NA	NA	NA	NA	NA	NA	NA	NA	NA	NA	NA	NA	NA	NA	NA	NA	NA	NA	NA	NA	NA	NA	NA	NA	NA	NA	NA	NA	NA	NA	NA	NA	NA	NA	NA	NA
192	CASSLDSSGNTIYF	NA	1	NA	NA	NA	NA	NA	NA	NA	NA	NA	NA	NA	NA	NA	NA	NA	NA	NA	NA	NA	NA	NA	NA	NA	NA	NA	NA	NA	NA	NA	NA	NA	NA	NA	NA	NA	NA	NA	NA	NA	NA	NA	NA	NA	NA	NA	NA
193	CASSLEGSYEQYF	NA	NA	1	NA	NA	NA	NA	NA	NA	NA	NA	NA	NA	NA	NA	NA	NA	NA	NA	NA	NA	NA	NA	NA	NA	NA	NA	NA	NA	NA	NA	TRB	HomoSapiens	RAKFKQLL	BZLF1	EBV	0	TRBV28	TRBJ2-7	5	7	HLA-B*08:01	B2M	MHCI	PMID:23267020,PMID:24512815	2	HomoSapiens	TRB
194	CASSLEGSYEQYF	NA	NA	1	NA	NA	NA	NA	NA	NA	NA	NA	NA	NA	NA	NA	NA	NA	NA	NA	NA	NA	NA	NA	NA	NA	NA	NA	NA	NA	NA	NA	TRB	HomoSapiens	KLVALGINAV	NS3	HCV	237	TRBV7-9*01	TRBJ2-7	5	7	HLA-A*02	B2M	MHCI	PMID:27252176	3	HomoSapiens	TRB
195	CASSLGGSGELFF	NA	1	NA	NA	NA	NA	NA	NA	NA	NA	NA	NA	NA	NA	NA	NA	NA	NA	NA	NA	NA	NA	NA	NA	NA	NA	NA	NA	NA	NA	NA	NA	NA	NA	NA	NA	NA	NA	NA	NA	NA	NA	NA	NA	NA	NA	NA	NA
196	CASSLGSTEAFF	NA	1	1	NA	NA	NA	NA	NA	NA	NA	NA	NA	NA	NA	NA	NA	NA	NA	NA	NA	NA	NA	NA	NA	NA	NA	NA	NA	NA	NA	NA	TRB	HomoSapiens	KLGGALQAK	IE1	CMV	9254	TRBV11-2	TRBJ1-1	5	7	HLA-A*03:01	B2M	MHCI	https://www.10xgenomics.com/resources/application-notes/a-new-way-of-exploring-immunity-linking-highly-multiplexed-antigen-recognition-to-immune-repertoire-and-phenotype/#	0	HomoSapiens	TRB
197	CASSLNTGELFF	NA	1	1	NA	NA	NA	NA	NA	NA	NA	NA	NA	NA	NA	NA	NA	NA	NA	NA	NA	NA	NA	NA	NA	NA	NA	NA	NA	NA	NA	NA	TRB	HomoSapiens	KLGGALQAK	IE1	CMV	20567	TRBV5-4	TRBJ2-2	5	5	HLA-A*03:01	B2M	MHCI	https://www.10xgenomics.com/resources/application-notes/a-new-way-of-exploring-immunity-linking-highly-multiplexed-antigen-recognition-to-immune-repertoire-and-phenotype/#	0	HomoSapiens	TRB
198	CASSLSGYEQYF	NA	NA	1	NA	NA	NA	NA	NA	NA	NA	NA	NA	NA	NA	NA	NA	NA	NA	NA	NA	NA	NA	NA	NA	NA	NA	NA	NA	NA	NA	NA	TRB	HomoSapiens	KLGGALQAK	IE1	CMV	652436	TRBV28	TRBJ2-7	5	7	HLA-A*03:01	B2M	MHCI	https://www.10xgenomics.com/resources/application-notes/a-new-way-of-exploring-immunity-linking-highly-multiplexed-antigen-recognition-to-immune-repertoire-and-phenotype/#	0	HomoSapiens	TRB
199	CASSLSGYEQYF	NA	NA	1	NA	NA	NA	NA	NA	NA	NA	NA	NA	NA	NA	NA	NA	NA	NA	NA	NA	NA	NA	NA	NA	NA	NA	NA	NA	NA	NA	NA	TRB	HomoSapiens	RLRAEAQVK	EBNA3A	EBV	1142	TRBV28	TRBJ2-7	5	7	HLA-A*03:01	B2M	MHCI	https://www.10xgenomics.com/resources/application-notes/a-new-way-of-exploring-immunity-linking-highly-multiplexed-antigen-recognition-to-immune-repertoire-and-phenotype/#	0	HomoSapiens	TRB
200	CASSLSGYEQYF	NA	NA	1	NA	NA	NA	NA	NA	NA	NA	NA	NA	NA	NA	NA	NA	NA	NA	NA	NA	NA	NA	NA	NA	NA	NA	NA	NA	NA	NA	NA	TRB	HomoSapiens	AVFDRKSDAK	EBNA4	EBV	375	TRBV28	TRBJ2-7	5	7	HLA-A*11:01	B2M	MHCI	https://www.10xgenomics.com/resources/application-notes/a-new-way-of-exploring-immunity-linking-highly-multiplexed-antigen-recognition-to-immune-repertoire-and-phenotype/#	0	HomoSapiens	TRB
201	CASSLTGANEKLFF	NA	1	NA	NA	NA	NA	NA	NA	NA	NA	NA	NA	NA	NA	NA	NA	NA	NA	NA	NA	NA	NA	NA	NA	NA	NA	NA	NA	NA	NA	NA	NA	NA	NA	NA	NA	NA	NA	NA	NA	NA	NA	NA	NA	NA	NA	NA	NA
202	CASSLWDQPQHF	NA	1	1	NA	NA	NA	NA	NA	NA	NA	NA	NA	NA	NA	NA	NA	NA	NA	NA	NA	NA	NA	NA	NA	NA	NA	NA	NA	NA	NA	NA	TRB	HomoSapiens	NLVPMVATV	pp65	CMV	0	TRBV7-9	TRBJ1-5	5	7	HLA-A*02	B2M	MHCI	PMID:28423320	0	HomoSapiens	TRB
203	CASSLYGNTEAFF	NA	1	NA	NA	NA	NA	NA	NA	NA	NA	NA	NA	NA	NA	NA	NA	NA	NA	NA	NA	NA	NA	NA	NA	NA	NA	NA	NA	NA	NA	NA	NA	NA	NA	NA	NA	NA	NA	NA	NA	NA	NA	NA	NA	NA	NA	NA	NA
204	CASSPDSYGYTF	NA	1	NA	NA	NA	NA	NA	NA	NA	NA	NA	NA	NA	NA	NA	NA	NA	NA	NA	NA	NA	NA	NA	NA	NA	NA	NA	NA	NA	NA	NA	NA	NA	NA	NA	NA	NA	NA	NA	NA	NA	NA	NA	NA	NA	NA	NA	NA
205	CASSPETGGSYEQYF	NA	NA	1	NA	NA	NA	NA	NA	NA	NA	NA	NA	NA	NA	NA	NA	NA	NA	NA	NA	NA	NA	NA	NA	NA	NA	NA	NA	NA	NA	NA	TRB	HomoSapiens	KLGGALQAK	IE1	CMV	14534	TRBV7-2	TRBJ2-7	4	9	HLA-A*03:01	B2M	MHCI	https://www.10xgenomics.com/resources/application-notes/a-new-way-of-exploring-immunity-linking-highly-multiplexed-antigen-recognition-to-immune-repertoire-and-phenotype/#	0	HomoSapiens	TRB
206	CASSPGLAGTGELFF	NA	1	1	NA	NA	NA	NA	NA	NA	NA	NA	NA	NA	NA	NA	NA	NA	NA	NA	NA	NA	NA	NA	NA	NA	NA	NA	NA	NA	NA	NA	TRB	HomoSapiens	FRDYVDRFYKTLRAEQASQE	Gag	HIV-1	0	TRBV2*02,TRBV2*03,TRBV2*01	TRBJ2-2*01	4	9	HLA-DRA*01:01	HLA-DRB5*01:01	MHCII	PMID:27111229	0	HomoSapiens	TRB
207	CASSPGTTNTGELFF	NA	NA	1	NA	NA	NA	NA	NA	NA	NA	NA	NA	NA	NA	NA	NA	NA	NA	NA	NA	NA	NA	NA	NA	NA	NA	NA	NA	NA	NA	NA	TRB	HomoSapiens	ARMILMTHF	NS5B	HCV	0	TRBV18,TRBV5-1	TRBJ2-2	5	8	HLA-B*27	B2M	MHCI	PMID:28146579	0	HomoSapiens	TRB
208	CASSPPSSYEQYF	NA	1	1	NA	NA	NA	NA	NA	NA	NA	NA	NA	NA	NA	NA	NA	NA	NA	NA	NA	NA	NA	NA	NA	NA	NA	NA	NA	NA	NA	NA	TRB	HomoSapiens	NLVPMVATV	pp65	CMV	0	TRBV27	TRBJ2-7	4	7	HLA-A*02	B2M	MHCI	PMID:28423320	0	HomoSapiens	TRB
209	CASSPPSSYEQYF	NA	1	1	NA	NA	NA	NA	NA	NA	NA	NA	NA	NA	NA	NA	NA	NA	NA	NA	NA	NA	NA	NA	NA	NA	NA	NA	NA	NA	NA	NA	TRB	HomoSapiens	KLGGALQAK	IE1	CMV	2030	TRBV18	TRBJ2-7	5	7	HLA-A*03:01	B2M	MHCI	https://www.10xgenomics.com/resources/application-notes/a-new-way-of-exploring-immunity-linking-highly-multiplexed-antigen-recognition-to-immune-repertoire-and-phenotype/#	0	HomoSapiens	TRB
210	CASSQDSYEQYF	1	NA	NA	NA	Human	Pathogens	Cytomegalovirus (CMV)	D003586	NA	1	Yes	pp65	P06725	RPHERNGFTVL	55170	HLA-B*07:02	PBMC	CD8	NA	NA	NA	NA	TRBV4-2	NA	TRBJ2-7	NA	NA	NA	30587531	NA	TRB	NA	NA	NA	NA	NA	NA	NA	NA	NA	NA	NA	NA	NA	NA	NA	NA	NA
211	CASSQGGNTEAFF	NA	1	NA	NA	NA	NA	NA	NA	NA	NA	NA	NA	NA	NA	NA	NA	NA	NA	NA	NA	NA	NA	NA	NA	NA	NA	NA	NA	NA	NA	NA	NA	NA	NA	NA	NA	NA	NA	NA	NA	NA	NA	NA	NA	NA	NA	NA	NA
212	CASSRDSSGANVLTF	NA	1	NA	NA	NA	NA	NA	NA	NA	NA	NA	NA	NA	NA	NA	NA	NA	NA	NA	NA	NA	NA	NA	NA	NA	NA	NA	NA	NA	NA	NA	NA	NA	NA	NA	NA	NA	NA	NA	NA	NA	NA	NA	NA	NA	NA	NA	NA
213	CASSRLQETQYF	NA	1	NA	NA	NA	NA	NA	NA	NA	NA	NA	NA	NA	NA	NA	NA	NA	NA	NA	NA	NA	NA	NA	NA	NA	NA	NA	NA	NA	NA	NA	NA	NA	NA	NA	NA	NA	NA	NA	NA	NA	NA	NA	NA	NA	NA	NA	NA
214	CASSRQETQYF	NA	1	NA	NA	NA	NA	NA	NA	NA	NA	NA	NA	NA	NA	NA	NA	NA	NA	NA	NA	NA	NA	NA	NA	NA	NA	NA	NA	NA	NA	NA	NA	NA	NA	NA	NA	NA	NA	NA	NA	NA	NA	NA	NA	NA	NA	NA	NA
215	CASSRQGNTEAFF	NA	1	NA	NA	NA	NA	NA	NA	NA	NA	NA	NA	NA	NA	NA	NA	NA	NA	NA	NA	NA	NA	NA	NA	NA	NA	NA	NA	NA	NA	NA	NA	NA	NA	NA	NA	NA	NA	NA	NA	NA	NA	NA	NA	NA	NA	NA	NA
216	CASSRTANTEAFF	NA	1	NA	NA	NA	NA	NA	NA	NA	NA	NA	NA	NA	NA	NA	NA	NA	NA	NA	NA	NA	NA	NA	NA	NA	NA	NA	NA	NA	NA	NA	NA	NA	NA	NA	NA	NA	NA	NA	NA	NA	NA	NA	NA	NA	NA	NA	NA
217	CASSSGRDYGYTF	NA	1	NA	NA	NA	NA	NA	NA	NA	NA	NA	NA	NA	NA	NA	NA	NA	NA	NA	NA	NA	NA	NA	NA	NA	NA	NA	NA	NA	NA	NA	NA	NA	NA	NA	NA	NA	NA	NA	NA	NA	NA	NA	NA	NA	NA	NA	NA
218	CASSSNTDTQYF	NA	1	NA	NA	NA	NA	NA	NA	NA	NA	NA	NA	NA	NA	NA	NA	NA	NA	NA	NA	NA	NA	NA	NA	NA	NA	NA	NA	NA	NA	NA	NA	NA	NA	NA	NA	NA	NA	NA	NA	NA	NA	NA	NA	NA	NA	NA	NA
219	CASSTGVYGYTF	NA	NA	1	NA	NA	NA	NA	NA	NA	NA	NA	NA	NA	NA	NA	NA	NA	NA	NA	NA	NA	NA	NA	NA	NA	NA	NA	NA	NA	NA	NA	TRB	HomoSapiens	GILGFVFTL	M	InfluenzaA	1482	TRBV19	TRBJ1-2	4	7	HLA-A*02:01	B2M	MHCI	https://www.10xgenomics.com/resources/application-notes/a-new-way-of-exploring-immunity-linking-highly-multiplexed-antigen-recognition-to-immune-repertoire-and-phenotype/#	0	HomoSapiens	TRB
220	CASSTSGGSYNEQFF	NA	1	NA	NA	NA	NA	NA	NA	NA	NA	NA	NA	NA	NA	NA	NA	NA	NA	NA	NA	NA	NA	NA	NA	NA	NA	NA	NA	NA	NA	NA	NA	NA	NA	NA	NA	NA	NA	NA	NA	NA	NA	NA	NA	NA	NA	NA	NA
221	CASSVGGRETQYF	NA	1	NA	NA	NA	NA	NA	NA	NA	NA	NA	NA	NA	NA	NA	NA	NA	NA	NA	NA	NA	NA	NA	NA	NA	NA	NA	NA	NA	NA	NA	NA	NA	NA	NA	NA	NA	NA	NA	NA	NA	NA	NA	NA	NA	NA	NA	NA
222	CASSYSEGYEQYF	NA	NA	1	NA	NA	NA	NA	NA	NA	NA	NA	NA	NA	NA	NA	NA	NA	NA	NA	NA	NA	NA	NA	NA	NA	NA	NA	NA	NA	NA	NA	TRB	HomoSapiens	GLCTLVAML	BMLF1	EBV	0	TRBV6-5	TRBJ2-7	5	8	HLA-A*02:01	B2M	MHCI	PMID:28636589	0	HomoSapiens	TRB
223	CSARDPTSGNTGELFF	NA	1	NA	NA	NA	NA	NA	NA	NA	NA	NA	NA	NA	NA	NA	NA	NA	NA	NA	NA	NA	NA	NA	NA	NA	NA	NA	NA	NA	NA	NA	NA	NA	NA	NA	NA	NA	NA	NA	NA	NA	NA	NA	NA	NA	NA	NA	NA
224	CASRKTGGYEQYF	NA	NA	1	NA	NA	NA	NA	NA	NA	NA	NA	NA	NA	NA	NA	NA	NA	NA	NA	NA	NA	NA	NA	NA	NA	NA	NA	NA	NA	NA	NA	TRB	HomoSapiens	AVFDRKSDAK	EBNA4	EBV	3174	TRBV6-5	TRBJ2-7	3	8	HLA-A*11:01	B2M	MHCI	https://www.10xgenomics.com/resources/application-notes/a-new-way-of-exploring-immunity-linking-highly-multiplexed-antigen-recognition-to-immune-repertoire-and-phenotype/#	0	HomoSapiens	TRB
225	CASRKTGGYEQYF	NA	NA	1	NA	NA	NA	NA	NA	NA	NA	NA	NA	NA	NA	NA	NA	NA	NA	NA	NA	NA	NA	NA	NA	NA	NA	NA	NA	NA	NA	NA	TRB	HomoSapiens	KLGGALQAK	IE1	CMV	3294	TRBV6-5	TRBJ2-7	3	8	HLA-A*03:01	B2M	MHCI	https://www.10xgenomics.com/resources/application-notes/a-new-way-of-exploring-immunity-linking-highly-multiplexed-antigen-recognition-to-immune-repertoire-and-phenotype/#	0	HomoSapiens	TRB
226	CASSENTGELFF	1	1	NA	NA	Human	Pathogens	Cytomegalovirus (CMV)	D003586	NA	1	Yes	pp65	P06725	RPHERNGFTVL	55170	HLA-B*07:02	PBMC	CD8	NA	NA	NA	NA	TRBV27	NA	TRBJ2-2	NA	NA	NA	30587531	NA	TRB	NA	NA	NA	NA	NA	NA	NA	NA	NA	NA	NA	NA	NA	NA	NA	NA	NA
227	CASSFRGSGNTIYF	NA	NA	2	NA	NA	NA	NA	NA	NA	NA	NA	NA	NA	NA	NA	NA	NA	NA	NA	NA	NA	NA	NA	NA	NA	NA	NA	NA	NA	NA	NA	TRB	HomoSapiens	KLGGALQAK	IE1	CMV	19287	TRBV13	TRBJ1-3	4	7	HLA-A*03:01	B2M	MHCI	https://www.10xgenomics.com/resources/application-notes/a-new-way-of-exploring-immunity-linking-highly-multiplexed-antigen-recognition-to-immune-repertoire-and-phenotype/#	0	HomoSapiens	TRB
228	CASSIGTGGTEAFF	NA	NA	1	NA	NA	NA	NA	NA	NA	NA	NA	NA	NA	NA	NA	NA	NA	NA	NA	NA	NA	NA	NA	NA	NA	NA	NA	NA	NA	NA	NA	TRB	HomoSapiens	AVFDRKSDAK	EBNA4	EBV	17593	TRBV19	TRBJ1-1	5	9	HLA-A*11:01	B2M	MHCI	https://www.10xgenomics.com/resources/application-notes/a-new-way-of-exploring-immunity-linking-highly-multiplexed-antigen-recognition-to-immune-repertoire-and-phenotype/#	0	HomoSapiens	TRB
229	CASSLGPSGNTIYF	1	NA	NA	NA	Human	Pathogens	Cytomegalovirus (CMV)	D003586	NA	1	Yes	pp65	P06725	RPHERNGFTVL	55170	HLA-B*07:02	PBMC	CD8	NA	NA	NA	NA	TRBV27	NA	TRBJ1-3	NA	NA	NA	30587531	NA	TRB	NA	NA	NA	NA	NA	NA	NA	NA	NA	NA	NA	NA	NA	NA	NA	NA	NA
230	CASSLGQGADTQYF	NA	NA	2	NA	NA	NA	NA	NA	NA	NA	NA	NA	NA	NA	NA	NA	NA	NA	NA	NA	NA	NA	NA	NA	NA	NA	NA	NA	NA	NA	NA	TRB	HomoSapiens	KLGGALQAK	IE1	CMV	19289	TRBV5-1	TRBJ2-3	5	9	HLA-A*03:01	B2M	MHCI	https://www.10xgenomics.com/resources/application-notes/a-new-way-of-exploring-immunity-linking-highly-multiplexed-antigen-recognition-to-immune-repertoire-and-phenotype/#	0	HomoSapiens	TRB
231	CASSLGQGRNEQFF	NA	1	1	NA	NA	NA	NA	NA	NA	NA	NA	NA	NA	NA	NA	NA	NA	NA	NA	NA	NA	NA	NA	NA	NA	NA	NA	NA	NA	NA	NA	TRB	HomoSapiens	KLGGALQAK	IE1	CMV	810	TRBV11-1	TRBJ2-1	5	9	HLA-A*03:01	B2M	MHCI	https://www.10xgenomics.com/resources/application-notes/a-new-way-of-exploring-immunity-linking-highly-multiplexed-antigen-recognition-to-immune-repertoire-and-phenotype/#	0	HomoSapiens	TRB
232	CASSLGQGRNEQFF	NA	1	1	NA	NA	NA	NA	NA	NA	NA	NA	NA	NA	NA	NA	NA	NA	NA	NA	NA	NA	NA	NA	NA	NA	NA	NA	NA	NA	NA	NA	TRB	HomoSapiens	NLVPMVATV	pp65	CMV	0	TRBV5-6	TRBJ2-1	5	9	HLA-A*02	B2M	MHCI	PMID:28423320	0	HomoSapiens	TRB
233	CASSLGQRSTEAFF	NA	NA	1	NA	NA	NA	NA	NA	NA	NA	NA	NA	NA	NA	NA	NA	NA	NA	NA	NA	NA	NA	NA	NA	NA	NA	NA	NA	NA	NA	NA	TRB	HomoSapiens	KRWIILGLNK	Gag	HIV-1	0	TRBV4-3	TRBJ1-1	4	10	HLA-B*27:05	B2M	MHCI	PMID:23521884	0	HomoSapiens	TRB
234	CASSLGTEAFF	NA	1	1	NA	NA	NA	NA	NA	NA	NA	NA	NA	NA	NA	NA	NA	NA	NA	NA	NA	NA	NA	NA	NA	NA	NA	NA	NA	NA	NA	NA	TRB	HomoSapiens	NLVPMVATV	pp65	CMV	0	TRBV5-6	TRBJ1-1	5	6	HLA-A*02	B2M	MHCI	PMID:28423320	0	HomoSapiens	TRB
235	CASSLGTEAFF	NA	1	1	NA	NA	NA	NA	NA	NA	NA	NA	NA	NA	NA	NA	NA	NA	NA	NA	NA	NA	NA	NA	NA	NA	NA	NA	NA	NA	NA	NA	TRB	HomoSapiens	NLVPMVATV	pp65	CMV	0	TRBV5-6	TRBJ1-1	5	6	HLA-A*02	B2M	MHCI	PMID:28423320	0	HomoSapiens	TRB
236	CASSLGVNQPQHF	NA	1	1	NA	NA	NA	NA	NA	NA	NA	NA	NA	NA	NA	NA	NA	NA	NA	NA	NA	NA	NA	NA	NA	NA	NA	NA	NA	NA	NA	NA	TRB	HomoSapiens	KLGGALQAK	IE1	CMV	10798	TRBV27	TRBJ1-5	5	7	HLA-A*03:01	B2M	MHCI	https://www.10xgenomics.com/resources/application-notes/a-new-way-of-exploring-immunity-linking-highly-multiplexed-antigen-recognition-to-immune-repertoire-and-phenotype/#	0	HomoSapiens	TRB
237	CASSLNHEQFF	NA	NA	1	NA	NA	NA	NA	NA	NA	NA	NA	NA	NA	NA	NA	NA	NA	NA	NA	NA	NA	NA	NA	NA	NA	NA	NA	NA	NA	NA	NA	TRB	HomoSapiens	KLGGALQAK	IE1	CMV	15270	TRBV13	TRBJ2-1	5	7	HLA-A*03:01	B2M	MHCI	https://www.10xgenomics.com/resources/application-notes/a-new-way-of-exploring-immunity-linking-highly-multiplexed-antigen-recognition-to-immune-repertoire-and-phenotype/#	0	HomoSapiens	TRB
238	CASSLVGGELFF	NA	NA	1	NA	NA	NA	NA	NA	NA	NA	NA	NA	NA	NA	NA	NA	NA	NA	NA	NA	NA	NA	NA	NA	NA	NA	NA	NA	NA	NA	NA	TRB	HomoSapiens	RAKFKQLL	BZLF1	EBV	5484	TRBV19	TRBJ2-2	4	7	HLA-B*08:01	B2M	MHCI	https://www.10xgenomics.com/resources/application-notes/a-new-way-of-exploring-immunity-linking-highly-multiplexed-antigen-recognition-to-immune-repertoire-and-phenotype/#	0	HomoSapiens	TRB
239	CASSLVSSYNEQFF	NA	1	NA	NA	NA	NA	NA	NA	NA	NA	NA	NA	NA	NA	NA	NA	NA	NA	NA	NA	NA	NA	NA	NA	NA	NA	NA	NA	NA	NA	NA	NA	NA	NA	NA	NA	NA	NA	NA	NA	NA	NA	NA	NA	NA	NA	NA	NA
240	CASSPGGLSGNTIYF	NA	1	NA	NA	NA	NA	NA	NA	NA	NA	NA	NA	NA	NA	NA	NA	NA	NA	NA	NA	NA	NA	NA	NA	NA	NA	NA	NA	NA	NA	NA	NA	NA	NA	NA	NA	NA	NA	NA	NA	NA	NA	NA	NA	NA	NA	NA	NA
241	CASSPRQGATEAFF	NA	1	NA	NA	NA	NA	NA	NA	NA	NA	NA	NA	NA	NA	NA	NA	NA	NA	NA	NA	NA	NA	NA	NA	NA	NA	NA	NA	NA	NA	NA	NA	NA	NA	NA	NA	NA	NA	NA	NA	NA	NA	NA	NA	NA	NA	NA	NA
242	CASSQGTGELFF	NA	4	4	NA	NA	NA	NA	NA	NA	NA	NA	NA	NA	NA	NA	NA	NA	NA	NA	NA	NA	NA	NA	NA	NA	NA	NA	NA	NA	NA	NA	TRB	HomoSapiens	KLGGALQAK	IE1	CMV	79827313	TRBV12-4	TRBJ2-2	4	6	HLA-A*03:01	B2M	MHCI	https://www.10xgenomics.com/resources/application-notes/a-new-way-of-exploring-immunity-linking-highly-multiplexed-antigen-recognition-to-immune-repertoire-and-phenotype/#	0	HomoSapiens	TRB
243	CASSQGTGELFF	NA	4	4	NA	NA	NA	NA	NA	NA	NA	NA	NA	NA	NA	NA	NA	NA	NA	NA	NA	NA	NA	NA	NA	NA	NA	NA	NA	NA	NA	NA	TRB	HomoSapiens	GILGFVFTL	M	InfluenzaA	0	TRBV5-4	TRBJ2-2	4	6	HLA-A*02	B2M	MHCI	PMID:28423320	0	HomoSapiens	TRB
244	CASSRTGGQETQYF	NA	1	NA	NA	NA	NA	NA	NA	NA	NA	NA	NA	NA	NA	NA	NA	NA	NA	NA	NA	NA	NA	NA	NA	NA	NA	NA	NA	NA	NA	NA	NA	NA	NA	NA	NA	NA	NA	NA	NA	NA	NA	NA	NA	NA	NA	NA	NA
245	CASSSGFNQPQHF	NA	1	NA	NA	NA	NA	NA	NA	NA	NA	NA	NA	NA	NA	NA	NA	NA	NA	NA	NA	NA	NA	NA	NA	NA	NA	NA	NA	NA	NA	NA	NA	NA	NA	NA	NA	NA	NA	NA	NA	NA	NA	NA	NA	NA	NA	NA	NA
246	CASSSGQGLDTQYF	NA	1	1	NA	NA	NA	NA	NA	NA	NA	NA	NA	NA	NA	NA	NA	NA	NA	NA	NA	NA	NA	NA	NA	NA	NA	NA	NA	NA	NA	NA	TRB	HomoSapiens	NLVPMVATV	pp65	CMV	0	TRBV5-1	TRBJ2-3	4	9	HLA-A*02	B2M	MHCI	PMID:28423320	0	HomoSapiens	TRB
247	CASSSGQGNQPQHF	NA	NA	1	NA	NA	NA	NA	NA	NA	NA	NA	NA	NA	NA	NA	NA	NA	NA	NA	NA	NA	NA	NA	NA	NA	NA	NA	NA	NA	NA	NA	TRB	HomoSapiens	GILGFVFTL	M	InfluenzaA	0	TRBV7-2	TRBJ1-5	4	8	HLA-A*02	B2M	MHCI	PMID:28423320	0	HomoSapiens	TRB
248	CASSSSNYGYTF	NA	2	NA	NA	NA	NA	NA	NA	NA	NA	NA	NA	NA	NA	NA	NA	NA	NA	NA	NA	NA	NA	NA	NA	NA	NA	NA	NA	NA	NA	NA	NA	NA	NA	NA	NA	NA	NA	NA	NA	NA	NA	NA	NA	NA	NA	NA	NA
249	CASSSSSNQPQHF	NA	2	NA	NA	NA	NA	NA	NA	NA	NA	NA	NA	NA	NA	NA	NA	NA	NA	NA	NA	NA	NA	NA	NA	NA	NA	NA	NA	NA	NA	NA	NA	NA	NA	NA	NA	NA	NA	NA	NA	NA	NA	NA	NA	NA	NA	NA	NA
250	CASSSTGSSYNEQFF	NA	1	NA	NA	NA	NA	NA	NA	NA	NA	NA	NA	NA	NA	NA	NA	NA	NA	NA	NA	NA	NA	NA	NA	NA	NA	NA	NA	NA	NA	NA	NA	NA	NA	NA	NA	NA	NA	NA	NA	NA	NA	NA	NA	NA	NA	NA	NA
251	CASSWGQMNTEAFF	NA	NA	2	NA	NA	NA	NA	NA	NA	NA	NA	NA	NA	NA	NA	NA	NA	NA	NA	NA	NA	NA	NA	NA	NA	NA	NA	NA	NA	NA	NA	TRB	HomoSapiens	ELAGIGILTV	MLANA	HomoSapiens	1695	TRBV28	TRBJ1-1	4	8	HLA-A*02:01	B2M	MHCI	https://www.10xgenomics.com/resources/application-notes/a-new-way-of-exploring-immunity-linking-highly-multiplexed-antigen-recognition-to-immune-repertoire-and-phenotype/#	0	HomoSapiens	TRB
252	CASSYYNEQFF	NA	1	1	NA	NA	NA	NA	NA	NA	NA	NA	NA	NA	NA	NA	NA	NA	NA	NA	NA	NA	NA	NA	NA	NA	NA	NA	NA	NA	NA	NA	TRB	HomoSapiens	AVFDRKSDAK	EBNA4	EBV	2806	TRBV4-3	TRBJ2-1	4	5	HLA-A*11:01	B2M	MHCI	https://www.10xgenomics.com/resources/application-notes/a-new-way-of-exploring-immunity-linking-highly-multiplexed-antigen-recognition-to-immune-repertoire-and-phenotype/#	0	HomoSapiens	TRB
253	CASSYYNEQFF	NA	1	1	NA	NA	NA	NA	NA	NA	NA	NA	NA	NA	NA	NA	NA	NA	NA	NA	NA	NA	NA	NA	NA	NA	NA	NA	NA	NA	NA	NA	TRB	HomoSapiens	IVTDFSVIK	EBNA4	EBV	3350	TRBV4-3	TRBJ2-1	4	5	HLA-A*11:01	B2M	MHCI	https://www.10xgenomics.com/resources/application-notes/a-new-way-of-exploring-immunity-linking-highly-multiplexed-antigen-recognition-to-immune-repertoire-and-phenotype/#	0	HomoSapiens	TRB
254	CATSDLGSSYNEQFF	NA	1	NA	NA	NA	NA	NA	NA	NA	NA	NA	NA	NA	NA	NA	NA	NA	NA	NA	NA	NA	NA	NA	NA	NA	NA	NA	NA	NA	NA	NA	NA	NA	NA	NA	NA	NA	NA	NA	NA	NA	NA	NA	NA	NA	NA	NA	NA
255	CSALGGDGETQYF	1	1	1	NA	Human	Pathogens	Cytomegalovirus (CMV)	D003586	NA	1	Yes	pp50	P16790	VTEHDTLLY	71290	HLA-A1	PBMC	CD8	NA	NA	NA	NA	TRBV29-1	NA	TRBJ2-5	No	TGCAGCGCCCTGGGGGGGGATGGAGAGACCCAGTACTTC	NA	28636589	NA	TRB	TRB	HomoSapiens	VTEHDTLLY	pp50	CMV	0	TRBV29-1	TRBJ2-5	2	8	HLA-A*01:01	B2M	MHCI	PMID:28636589	0	HomoSapiens	TRB
256	CASSEGQGNTEAFF	NA	NA	2	NA	NA	NA	NA	NA	NA	NA	NA	NA	NA	NA	NA	NA	NA	NA	NA	NA	NA	NA	NA	NA	NA	NA	NA	NA	NA	NA	NA	TRB	HomoSapiens	KLGGALQAK	IE1	CMV	13020	TRBV9	TRBJ1-1	4	8	HLA-A*03:01	B2M	MHCI	https://www.10xgenomics.com/resources/application-notes/a-new-way-of-exploring-immunity-linking-highly-multiplexed-antigen-recognition-to-immune-repertoire-and-phenotype/#	0	HomoSapiens	TRB
257	CASSLEGQPQHF	NA	2	NA	NA	NA	NA	NA	NA	NA	NA	NA	NA	NA	NA	NA	NA	NA	NA	NA	NA	NA	NA	NA	NA	NA	NA	NA	NA	NA	NA	NA	NA	NA	NA	NA	NA	NA	NA	NA	NA	NA	NA	NA	NA	NA	NA	NA	NA
258	CASSLGSGNQPQHF	NA	2	NA	NA	NA	NA	NA	NA	NA	NA	NA	NA	NA	NA	NA	NA	NA	NA	NA	NA	NA	NA	NA	NA	NA	NA	NA	NA	NA	NA	NA	NA	NA	NA	NA	NA	NA	NA	NA	NA	NA	NA	NA	NA	NA	NA	NA	NA
259	CASSLTSGPYNEQFF	NA	2	2	NA	NA	NA	NA	NA	NA	NA	NA	NA	NA	NA	NA	NA	NA	NA	NA	NA	NA	NA	NA	NA	NA	NA	NA	NA	NA	NA	NA	TRB	HomoSapiens	KLGGALQAK	IE1	CMV	19433	TRBV7-2	TRBJ2-1	5	9	HLA-A*03:01	B2M	MHCI	https://www.10xgenomics.com/resources/application-notes/a-new-way-of-exploring-immunity-linking-highly-multiplexed-antigen-recognition-to-immune-repertoire-and-phenotype/#	0	HomoSapiens	TRB
260	CASSPGQGGNQPQHF	NA	NA	2	NA	NA	NA	NA	NA	NA	NA	NA	NA	NA	NA	NA	NA	NA	NA	NA	NA	NA	NA	NA	NA	NA	NA	NA	NA	NA	NA	NA	TRB	HomoSapiens	KLGGALQAK	IE1	CMV	19066	TRBV10-2	TRBJ1-5	4	9	HLA-A*03:01	B2M	MHCI	https://www.10xgenomics.com/resources/application-notes/a-new-way-of-exploring-immunity-linking-highly-multiplexed-antigen-recognition-to-immune-repertoire-and-phenotype/#	0	HomoSapiens	TRB
261	CASSPGTGTYGYTF	2	2	2	NA	Human	Pathogens	Cytomegalovirus (CMV)	D003586	NA	1	Yes	pp50	P16790	VTEHDTLLY	71290	HLA-A1	PBMC	CD8	NA	NA	NA	NA	TRBV10-2	NA	TRBJ1-2	No	TGCGCCAGCAGTCCCGGGACAGGGACCTATGGCTACACCTTC	NA	28636589	NA	TRB	TRB	HomoSapiens	VTEHDTLLY	pp50	CMV	0	TRBV10-2	TRBJ1-2	4	9	HLA-A*01:01	B2M	MHCI	PMID:28636589	1	HomoSapiens	TRB
262	CASSSDFYEQYF	NA	NA	2	NA	NA	NA	NA	NA	NA	NA	NA	NA	NA	NA	NA	NA	NA	NA	NA	NA	NA	NA	NA	NA	NA	NA	NA	NA	NA	NA	NA	TRB	HomoSapiens	KLGGALQAK	IE1	CMV	18507	TRBV5-5	TRBJ2-7	4	7	HLA-A*03:01	B2M	MHCI	https://www.10xgenomics.com/resources/application-notes/a-new-way-of-exploring-immunity-linking-highly-multiplexed-antigen-recognition-to-immune-repertoire-and-phenotype/#	0	HomoSapiens	TRB
263	CASSTRAAYEQYF	NA	2	2	NA	NA	NA	NA	NA	NA	NA	NA	NA	NA	NA	NA	NA	NA	NA	NA	NA	NA	NA	NA	NA	NA	NA	NA	NA	NA	NA	NA	TRB	HomoSapiens	GILGFVFTL	M	InfluenzaA	5.68723E+11	TRBV19,TRBV19*01	TRBJ2-7*01,TRBJ2-7	4	8	HLA-A*02:01,HLA-A*02	B2M	MHCI	PMID:28423320,https://www.10xgenomics.com/resources/application-notes/a-new-way-of-exploring-immunity-linking-highly-multiplexed-antigen-recognition-to-immune-repertoire-and-phenotype/#,PMID:28636592	0	HomoSapiens	TRB
264	CASSFGGGTDTQYF	NA	2	2	NA	NA	NA	NA	NA	NA	NA	NA	NA	NA	NA	NA	NA	NA	NA	NA	NA	NA	NA	NA	NA	NA	NA	NA	NA	NA	NA	NA	TRB	HomoSapiens	NLVPMVATV	pp65	CMV	0	TRBV7-9	TRBJ2-3	4	8	HLA-A*02	B2M	MHCI	PMID:28423320	0	HomoSapiens	TRB
265	CASSLAGGINEQFF	NA	3	3	NA	NA	NA	NA	NA	NA	NA	NA	NA	NA	NA	NA	NA	NA	NA	NA	NA	NA	NA	NA	NA	NA	NA	NA	NA	NA	NA	NA	TRB	HomoSapiens	KLGGALQAK	IE1	CMV	14911	TRBV27	TRBJ2-1	5	9	HLA-A*03:01	B2M	MHCI	https://www.10xgenomics.com/resources/application-notes/a-new-way-of-exploring-immunity-linking-highly-multiplexed-antigen-recognition-to-immune-repertoire-and-phenotype/#	0	HomoSapiens	TRB
266	CASSLAGGINEQFF	NA	3	3	NA	NA	NA	NA	NA	NA	NA	NA	NA	NA	NA	NA	NA	NA	NA	NA	NA	NA	NA	NA	NA	NA	NA	NA	NA	NA	NA	NA	TRB	HomoSapiens	NLVPMVATV	pp65	CMV	0	TRBV7-6	TRBJ2-1	5	9	HLA-A*02	B2M	MHCI	PMID:28423320	0	HomoSapiens	TRB
267	CASSLAGNTGELFF	NA	2	NA	NA	NA	NA	NA	NA	NA	NA	NA	NA	NA	NA	NA	NA	NA	NA	NA	NA	NA	NA	NA	NA	NA	NA	NA	NA	NA	NA	NA	NA	NA	NA	NA	NA	NA	NA	NA	NA	NA	NA	NA	NA	NA	NA	NA	NA
268	CASSLHNEQFF	NA	NA	3	NA	NA	NA	NA	NA	NA	NA	NA	NA	NA	NA	NA	NA	NA	NA	NA	NA	NA	NA	NA	NA	NA	NA	NA	NA	NA	NA	NA	TRB	HomoSapiens	GLCTLVAML	BMLF1	EBV	0	TRBV12-3	TRBJ2-1	5	6	HLA-A*02:01	B2M	MHCI	PMID:28636589	0	HomoSapiens	TRB
269	CASSLGTGELFF	NA	NA	3	NA	NA	NA	NA	NA	NA	NA	NA	NA	NA	NA	NA	NA	NA	NA	NA	NA	NA	NA	NA	NA	NA	NA	NA	NA	NA	NA	NA	TRB	HomoSapiens	KLGGALQAK	IE1	CMV	7519	TRBV12-4	TRBJ2-2	5	6	HLA-A*03:01	B2M	MHCI	https://www.10xgenomics.com/resources/application-notes/a-new-way-of-exploring-immunity-linking-highly-multiplexed-antigen-recognition-to-immune-repertoire-and-phenotype/#	0	HomoSapiens	TRB
270	CASRTGGTEAFF	NA	2	NA	NA	NA	NA	NA	NA	NA	NA	NA	NA	NA	NA	NA	NA	NA	NA	NA	NA	NA	NA	NA	NA	NA	NA	NA	NA	NA	NA	NA	NA	NA	NA	NA	NA	NA	NA	NA	NA	NA	NA	NA	NA	NA	NA	NA	NA
271	CASSFDRGSEKLFF	NA	NA	2	NA	NA	NA	NA	NA	NA	NA	NA	NA	NA	NA	NA	NA	NA	NA	NA	NA	NA	NA	NA	NA	NA	NA	NA	NA	NA	NA	NA	TRB	HomoSapiens	KLGGALQAK	IE1	CMV	16547	TRBV6-5	TRBJ1-4	4	9	HLA-A*03:01	B2M	MHCI	https://www.10xgenomics.com/resources/application-notes/a-new-way-of-exploring-immunity-linking-highly-multiplexed-antigen-recognition-to-immune-repertoire-and-phenotype/#	0	HomoSapiens	TRB
272	CASSLATGELFF	NA	NA	2	NA	NA	NA	NA	NA	NA	NA	NA	NA	NA	NA	NA	NA	NA	NA	NA	NA	NA	NA	NA	NA	NA	NA	NA	NA	NA	NA	NA	TRB	HomoSapiens	KLGGALQAK	IE1	CMV	187059659	TRBV11-1,TRBV6-3	TRBJ2-2	5	6	HLA-A*03:01	B2M	MHCI	https://www.10xgenomics.com/resources/application-notes/a-new-way-of-exploring-immunity-linking-highly-multiplexed-antigen-recognition-to-immune-repertoire-and-phenotype/#	0	HomoSapiens	TRB
273	CASSLDGQGPLYGYTF	NA	NA	2	NA	NA	NA	NA	NA	NA	NA	NA	NA	NA	NA	NA	NA	NA	NA	NA	NA	NA	NA	NA	NA	NA	NA	NA	NA	NA	NA	NA	TRB	HomoSapiens	RLRAEAQVK	EBNA3A	EBV	4481	TRBV11-2	TRBJ1-2	5	11	HLA-A*03:01	B2M	MHCI	https://www.10xgenomics.com/resources/application-notes/a-new-way-of-exploring-immunity-linking-highly-multiplexed-antigen-recognition-to-immune-repertoire-and-phenotype/#	0	HomoSapiens	TRB
274	CASSLDGQGPLYGYTF	NA	NA	2	NA	NA	NA	NA	NA	NA	NA	NA	NA	NA	NA	NA	NA	NA	NA	NA	NA	NA	NA	NA	NA	NA	NA	NA	NA	NA	NA	NA	TRB	HomoSapiens	KLGGALQAK	IE1	CMV	76446116	TRBV11-2	TRBJ1-2	5	11	HLA-A*03:01	B2M	MHCI	https://www.10xgenomics.com/resources/application-notes/a-new-way-of-exploring-immunity-linking-highly-multiplexed-antigen-recognition-to-immune-repertoire-and-phenotype/#	0	HomoSapiens	TRB
275	CASSLDGQGPLYGYTF	NA	NA	2	NA	NA	NA	NA	NA	NA	NA	NA	NA	NA	NA	NA	NA	NA	NA	NA	NA	NA	NA	NA	NA	NA	NA	NA	NA	NA	NA	NA	TRB	HomoSapiens	AVFDRKSDAK	EBNA4	EBV	4482	TRBV11-2	TRBJ1-2	5	11	HLA-A*11:01	B2M	MHCI	https://www.10xgenomics.com/resources/application-notes/a-new-way-of-exploring-immunity-linking-highly-multiplexed-antigen-recognition-to-immune-repertoire-and-phenotype/#	0	HomoSapiens	TRB
276	CASSLGDRDGYTF	NA	2	NA	NA	NA	NA	NA	NA	NA	NA	NA	NA	NA	NA	NA	NA	NA	NA	NA	NA	NA	NA	NA	NA	NA	NA	NA	NA	NA	NA	NA	NA	NA	NA	NA	NA	NA	NA	NA	NA	NA	NA	NA	NA	NA	NA	NA	NA
277	CASSPGTGYYEQYF	NA	NA	2	NA	NA	NA	NA	NA	NA	NA	NA	NA	NA	NA	NA	NA	NA	NA	NA	NA	NA	NA	NA	NA	NA	NA	NA	NA	NA	NA	NA	TRB	HomoSapiens	GILGFVFTL	M	InfluenzaA	0	TRBV18	TRBJ2-7	5	9	HLA-A*02	B2M	MHCI	PMID:28423320	0	HomoSapiens	TRB
278	CASSPTGHYGYTF	NA	2	NA	NA	NA	NA	NA	NA	NA	NA	NA	NA	NA	NA	NA	NA	NA	NA	NA	NA	NA	NA	NA	NA	NA	NA	NA	NA	NA	NA	NA	NA	NA	NA	NA	NA	NA	NA	NA	NA	NA	NA	NA	NA	NA	NA	NA	NA
279	CASSLGGNEQFF	NA	3	3	NA	NA	NA	NA	NA	NA	NA	NA	NA	NA	NA	NA	NA	NA	NA	NA	NA	NA	NA	NA	NA	NA	NA	NA	NA	NA	NA	NA	TRB	HomoSapiens	RAKFKQLL	BZLF1	EBV	2465	TRBV7-9	TRBJ2-1	5	7	HLA-B*08:01	B2M	MHCI	https://www.10xgenomics.com/resources/application-notes/a-new-way-of-exploring-immunity-linking-highly-multiplexed-antigen-recognition-to-immune-repertoire-and-phenotype/#	0	HomoSapiens	TRB
280	CASSLGGNEQFF	NA	3	3	NA	NA	NA	NA	NA	NA	NA	NA	NA	NA	NA	NA	NA	NA	NA	NA	NA	NA	NA	NA	NA	NA	NA	NA	NA	NA	NA	NA	TRB	HomoSapiens	RAKFKQLL	BZLF1	EBV	2465	TRBV7-9	TRBJ2-1	5	7	HLA-B*08:01	B2M	MHCI	https://www.10xgenomics.com/resources/application-notes/a-new-way-of-exploring-immunity-linking-highly-multiplexed-antigen-recognition-to-immune-repertoire-and-phenotype/#	0	HomoSapiens	TRB
281	CASSLGGNEQFF	NA	3	3	NA	NA	NA	NA	NA	NA	NA	NA	NA	NA	NA	NA	NA	NA	NA	NA	NA	NA	NA	NA	NA	NA	NA	NA	NA	NA	NA	NA	TRB	HomoSapiens	NLVPMVATV	pp65	CMV	0	TRBV5-1	TRBJ2-1	5	7	HLA-A*02	B2M	MHCI	PMID:28423320	0	HomoSapiens	TRB
282	CASSLGGNEQFF	NA	3	3	NA	NA	NA	NA	NA	NA	NA	NA	NA	NA	NA	NA	NA	NA	NA	NA	NA	NA	NA	NA	NA	NA	NA	NA	NA	NA	NA	NA	TRB	HomoSapiens	NLVPMVATV	pp65	CMV	0	TRBV5-1	TRBJ2-1	5	7	HLA-A*02	B2M	MHCI	PMID:28423320	0	HomoSapiens	TRB
283	CASSLGGNEQFF	NA	3	3	NA	NA	NA	NA	NA	NA	NA	NA	NA	NA	NA	NA	NA	NA	NA	NA	NA	NA	NA	NA	NA	NA	NA	NA	NA	NA	NA	NA	TRB	HomoSapiens	ELAGIGILTV	MLANA	HomoSapiens	3997	TRBV12-4	TRBJ2-1	5	7	HLA-A*02:01	B2M	MHCI	https://www.10xgenomics.com/resources/application-notes/a-new-way-of-exploring-immunity-linking-highly-multiplexed-antigen-recognition-to-immune-repertoire-and-phenotype/#	0	HomoSapiens	TRB
284	CASSLGGNEQFF	NA	3	3	NA	NA	NA	NA	NA	NA	NA	NA	NA	NA	NA	NA	NA	NA	NA	NA	NA	NA	NA	NA	NA	NA	NA	NA	NA	NA	NA	NA	TRB	HomoSapiens	ELAGIGILTV	MLANA	HomoSapiens	3997	TRBV12-4	TRBJ2-1	5	7	HLA-A*02:01	B2M	MHCI	https://www.10xgenomics.com/resources/application-notes/a-new-way-of-exploring-immunity-linking-highly-multiplexed-antigen-recognition-to-immune-repertoire-and-phenotype/#	0	HomoSapiens	TRB
285	CASSPGGTDTQYF	NA	3	NA	NA	NA	NA	NA	NA	NA	NA	NA	NA	NA	NA	NA	NA	NA	NA	NA	NA	NA	NA	NA	NA	NA	NA	NA	NA	NA	NA	NA	NA	NA	NA	NA	NA	NA	NA	NA	NA	NA	NA	NA	NA	NA	NA	NA	NA
286	CASSRGGGNQPQHF	NA	2	NA	NA	NA	NA	NA	NA	NA	NA	NA	NA	NA	NA	NA	NA	NA	NA	NA	NA	NA	NA	NA	NA	NA	NA	NA	NA	NA	NA	NA	NA	NA	NA	NA	NA	NA	NA	NA	NA	NA	NA	NA	NA	NA	NA	NA	NA
287	CASSYDSNQPQHF	NA	4	NA	NA	NA	NA	NA	NA	NA	NA	NA	NA	NA	NA	NA	NA	NA	NA	NA	NA	NA	NA	NA	NA	NA	NA	NA	NA	NA	NA	NA	NA	NA	NA	NA	NA	NA	NA	NA	NA	NA	NA	NA	NA	NA	NA	NA	NA
288	CASSLATDTQYF	NA	2	NA	NA	NA	NA	NA	NA	NA	NA	NA	NA	NA	NA	NA	NA	NA	NA	NA	NA	NA	NA	NA	NA	NA	NA	NA	NA	NA	NA	NA	NA	NA	NA	NA	NA	NA	NA	NA	NA	NA	NA	NA	NA	NA	NA	NA	NA
289	CASSLGGGETQYF	NA	2	NA	NA	NA	NA	NA	NA	NA	NA	NA	NA	NA	NA	NA	NA	NA	NA	NA	NA	NA	NA	NA	NA	NA	NA	NA	NA	NA	NA	NA	NA	NA	NA	NA	NA	NA	NA	NA	NA	NA	NA	NA	NA	NA	NA	NA	NA
290	CSAPGQGSSEQYF	NA	NA	3	NA	NA	NA	NA	NA	NA	NA	NA	NA	NA	NA	NA	NA	NA	NA	NA	NA	NA	NA	NA	NA	NA	NA	NA	NA	NA	NA	NA	TRB	HomoSapiens	KLGGALQAK	IE1	CMV	7949	TRBV20-1	TRBJ2-7	3	9	HLA-A*03:01	B2M	MHCI	https://www.10xgenomics.com/resources/application-notes/a-new-way-of-exploring-immunity-linking-highly-multiplexed-antigen-recognition-to-immune-repertoire-and-phenotype/#	0	HomoSapiens	TRB
291	CASSLNSYEQYF	NA	6	NA	NA	NA	NA	NA	NA	NA	NA	NA	NA	NA	NA	NA	NA	NA	NA	NA	NA	NA	NA	NA	NA	NA	NA	NA	NA	NA	NA	NA	NA	NA	NA	NA	NA	NA	NA	NA	NA	NA	NA	NA	NA	NA	NA	NA	NA
292	CASSPPLNEQFF	NA	6	NA	NA	NA	NA	NA	NA	NA	NA	NA	NA	NA	NA	NA	NA	NA	NA	NA	NA	NA	NA	NA	NA	NA	NA	NA	NA	NA	NA	NA	NA	NA	NA	NA	NA	NA	NA	NA	NA	NA	NA	NA	NA	NA	NA	NA	NA
293	CASSYSDSNQPQHF	NA	NA	6	NA	NA	NA	NA	NA	NA	NA	NA	NA	NA	NA	NA	NA	NA	NA	NA	NA	NA	NA	NA	NA	NA	NA	NA	NA	NA	NA	NA	TRB	HomoSapiens	KLGGALQAK	IE1	CMV	11425	TRBV27	TRBJ1-5	4	7	HLA-A*03:01	B2M	MHCI	https://www.10xgenomics.com/resources/application-notes/a-new-way-of-exploring-immunity-linking-highly-multiplexed-antigen-recognition-to-immune-repertoire-and-phenotype/#	0	HomoSapiens	TRB
294	CASSIRSSYEQYF	NA	4	4	NA	NA	NA	NA	NA	NA	NA	NA	NA	NA	NA	NA	NA	NA	NA	NA	NA	NA	NA	NA	NA	NA	NA	NA	NA	NA	NA	NA	TRB	HomoSapiens	IVTDFSVIK	EBNA4	EBV	458	TRBV19	TRBJ2-7	5	7	HLA-A*11:01	B2M	MHCI	https://www.10xgenomics.com/resources/application-notes/a-new-way-of-exploring-immunity-linking-highly-multiplexed-antigen-recognition-to-immune-repertoire-and-phenotype/#	0	HomoSapiens	TRB
295	CASSIRSSYEQYF	NA	4	4	NA	NA	NA	NA	NA	NA	NA	NA	NA	NA	NA	NA	NA	NA	NA	NA	NA	NA	NA	NA	NA	NA	NA	NA	NA	NA	NA	NA	TRB	HomoSapiens	IVTDFSVIK	EBNA4	EBV	458	TRBV19	TRBJ2-7	5	7	HLA-A*11:01	B2M	MHCI	https://www.10xgenomics.com/resources/application-notes/a-new-way-of-exploring-immunity-linking-highly-multiplexed-antigen-recognition-to-immune-repertoire-and-phenotype/#	0	HomoSapiens	TRB
296	CASSIRSSYEQYF	NA	4	4	NA	NA	NA	NA	NA	NA	NA	NA	NA	NA	NA	NA	NA	NA	NA	NA	NA	NA	NA	NA	NA	NA	NA	NA	NA	NA	NA	NA	TRB	HomoSapiens	IVTDFSVIK	EBNA4	EBV	458	TRBV19	TRBJ2-7	5	7	HLA-A*11:01	B2M	MHCI	https://www.10xgenomics.com/resources/application-notes/a-new-way-of-exploring-immunity-linking-highly-multiplexed-antigen-recognition-to-immune-repertoire-and-phenotype/#	0	HomoSapiens	TRB
297	CASSIRSSYEQYF	NA	4	4	NA	NA	NA	NA	NA	NA	NA	NA	NA	NA	NA	NA	NA	NA	NA	NA	NA	NA	NA	NA	NA	NA	NA	NA	NA	NA	NA	NA	TRB	HomoSapiens	IVTDFSVIK	EBNA4	EBV	458	TRBV19	TRBJ2-7	5	7	HLA-A*11:01	B2M	MHCI	https://www.10xgenomics.com/resources/application-notes/a-new-way-of-exploring-immunity-linking-highly-multiplexed-antigen-recognition-to-immune-repertoire-and-phenotype/#	0	HomoSapiens	TRB
298	CASSIRSSYEQYF	NA	4	4	NA	NA	NA	NA	NA	NA	NA	NA	NA	NA	NA	NA	NA	NA	NA	NA	NA	NA	NA	NA	NA	NA	NA	NA	NA	NA	NA	NA	TRB	HomoSapiens	IVTDFSVIK	EBNA4	EBV	458	TRBV19	TRBJ2-7	5	7	HLA-A*11:01	B2M	MHCI	https://www.10xgenomics.com/resources/application-notes/a-new-way-of-exploring-immunity-linking-highly-multiplexed-antigen-recognition-to-immune-repertoire-and-phenotype/#	0	HomoSapiens	TRB
299	CASSIRSSYEQYF	NA	4	4	NA	NA	NA	NA	NA	NA	NA	NA	NA	NA	NA	NA	NA	NA	NA	NA	NA	NA	NA	NA	NA	NA	NA	NA	NA	NA	NA	NA	TRB	HomoSapiens	IVTDFSVIK	EBNA4	EBV	458	TRBV19	TRBJ2-7	5	7	HLA-A*11:01	B2M	MHCI	https://www.10xgenomics.com/resources/application-notes/a-new-way-of-exploring-immunity-linking-highly-multiplexed-antigen-recognition-to-immune-repertoire-and-phenotype/#	0	HomoSapiens	TRB
300	CASSIRSSYEQYF	NA	4	4	NA	NA	NA	NA	NA	NA	NA	NA	NA	NA	NA	NA	NA	NA	NA	NA	NA	NA	NA	NA	NA	NA	NA	NA	NA	NA	NA	NA	TRB	HomoSapiens	IVTDFSVIK	EBNA4	EBV	458	TRBV19	TRBJ2-7	5	7	HLA-A*11:01	B2M	MHCI	https://www.10xgenomics.com/resources/application-notes/a-new-way-of-exploring-immunity-linking-highly-multiplexed-antigen-recognition-to-immune-repertoire-and-phenotype/#	0	HomoSapiens	TRB
301	CASSIRSSYEQYF	NA	4	4	NA	NA	NA	NA	NA	NA	NA	NA	NA	NA	NA	NA	NA	NA	NA	NA	NA	NA	NA	NA	NA	NA	NA	NA	NA	NA	NA	NA	TRB	HomoSapiens	IVTDFSVIK	EBNA4	EBV	458	TRBV19	TRBJ2-7	5	7	HLA-A*11:01	B2M	MHCI	https://www.10xgenomics.com/resources/application-notes/a-new-way-of-exploring-immunity-linking-highly-multiplexed-antigen-recognition-to-immune-repertoire-and-phenotype/#	0	HomoSapiens	TRB
302	CASSIRSSYEQYF	NA	4	4	NA	NA	NA	NA	NA	NA	NA	NA	NA	NA	NA	NA	NA	NA	NA	NA	NA	NA	NA	NA	NA	NA	NA	NA	NA	NA	NA	NA	TRB	HomoSapiens	IVTDFSVIK	EBNA4	EBV	458	TRBV19	TRBJ2-7	5	7	HLA-A*11:01	B2M	MHCI	https://www.10xgenomics.com/resources/application-notes/a-new-way-of-exploring-immunity-linking-highly-multiplexed-antigen-recognition-to-immune-repertoire-and-phenotype/#	0	HomoSapiens	TRB
303	CASSIRSSYEQYF	NA	4	4	NA	NA	NA	NA	NA	NA	NA	NA	NA	NA	NA	NA	NA	NA	NA	NA	NA	NA	NA	NA	NA	NA	NA	NA	NA	NA	NA	NA	TRB	HomoSapiens	IVTDFSVIK	EBNA4	EBV	458	TRBV19	TRBJ2-7	5	7	HLA-A*11:01	B2M	MHCI	https://www.10xgenomics.com/resources/application-notes/a-new-way-of-exploring-immunity-linking-highly-multiplexed-antigen-recognition-to-immune-repertoire-and-phenotype/#	0	HomoSapiens	TRB
304	CASSIRSSYEQYF	NA	4	4	NA	NA	NA	NA	NA	NA	NA	NA	NA	NA	NA	NA	NA	NA	NA	NA	NA	NA	NA	NA	NA	NA	NA	NA	NA	NA	NA	NA	TRB	HomoSapiens	IVTDFSVIK	EBNA4	EBV	458	TRBV19	TRBJ2-7	5	7	HLA-A*11:01	B2M	MHCI	https://www.10xgenomics.com/resources/application-notes/a-new-way-of-exploring-immunity-linking-highly-multiplexed-antigen-recognition-to-immune-repertoire-and-phenotype/#	0	HomoSapiens	TRB
305	CASSIRSSYEQYF	NA	4	4	NA	NA	NA	NA	NA	NA	NA	NA	NA	NA	NA	NA	NA	NA	NA	NA	NA	NA	NA	NA	NA	NA	NA	NA	NA	NA	NA	NA	TRB	HomoSapiens	IVTDFSVIK	EBNA4	EBV	458	TRBV19	TRBJ2-7	5	7	HLA-A*11:01	B2M	MHCI	https://www.10xgenomics.com/resources/application-notes/a-new-way-of-exploring-immunity-linking-highly-multiplexed-antigen-recognition-to-immune-repertoire-and-phenotype/#	0	HomoSapiens	TRB
306	CASSIRSSYEQYF	NA	4	4	NA	NA	NA	NA	NA	NA	NA	NA	NA	NA	NA	NA	NA	NA	NA	NA	NA	NA	NA	NA	NA	NA	NA	NA	NA	NA	NA	NA	TRB	HomoSapiens	IVTDFSVIK	EBNA4	EBV	458	TRBV19	TRBJ2-7	5	7	HLA-A*11:01	B2M	MHCI	https://www.10xgenomics.com/resources/application-notes/a-new-way-of-exploring-immunity-linking-highly-multiplexed-antigen-recognition-to-immune-repertoire-and-phenotype/#	0	HomoSapiens	TRB
307	CASSIRSSYEQYF	NA	4	4	NA	NA	NA	NA	NA	NA	NA	NA	NA	NA	NA	NA	NA	NA	NA	NA	NA	NA	NA	NA	NA	NA	NA	NA	NA	NA	NA	NA	TRB	HomoSapiens	IVTDFSVIK	EBNA4	EBV	458	TRBV19	TRBJ2-7	5	7	HLA-A*11:01	B2M	MHCI	https://www.10xgenomics.com/resources/application-notes/a-new-way-of-exploring-immunity-linking-highly-multiplexed-antigen-recognition-to-immune-repertoire-and-phenotype/#	0	HomoSapiens	TRB
308	CASSIRSSYEQYF	NA	4	4	NA	NA	NA	NA	NA	NA	NA	NA	NA	NA	NA	NA	NA	NA	NA	NA	NA	NA	NA	NA	NA	NA	NA	NA	NA	NA	NA	NA	TRB	HomoSapiens	IVTDFSVIK	EBNA4	EBV	458	TRBV19	TRBJ2-7	5	7	HLA-A*11:01	B2M	MHCI	https://www.10xgenomics.com/resources/application-notes/a-new-way-of-exploring-immunity-linking-highly-multiplexed-antigen-recognition-to-immune-repertoire-and-phenotype/#	0	HomoSapiens	TRB
309	CASSIRSSYEQYF	NA	4	4	NA	NA	NA	NA	NA	NA	NA	NA	NA	NA	NA	NA	NA	NA	NA	NA	NA	NA	NA	NA	NA	NA	NA	NA	NA	NA	NA	NA	TRB	HomoSapiens	IVTDFSVIK	EBNA4	EBV	458	TRBV19	TRBJ2-7	5	7	HLA-A*11:01	B2M	MHCI	https://www.10xgenomics.com/resources/application-notes/a-new-way-of-exploring-immunity-linking-highly-multiplexed-antigen-recognition-to-immune-repertoire-and-phenotype/#	0	HomoSapiens	TRB
310	CASSIRSSYEQYF	NA	4	4	NA	NA	NA	NA	NA	NA	NA	NA	NA	NA	NA	NA	NA	NA	NA	NA	NA	NA	NA	NA	NA	NA	NA	NA	NA	NA	NA	NA	TRB	HomoSapiens	IVTDFSVIK	EBNA4	EBV	458	TRBV19	TRBJ2-7	5	7	HLA-A*11:01	B2M	MHCI	https://www.10xgenomics.com/resources/application-notes/a-new-way-of-exploring-immunity-linking-highly-multiplexed-antigen-recognition-to-immune-repertoire-and-phenotype/#	0	HomoSapiens	TRB
311	CASSIRSSYEQYF	NA	4	4	NA	NA	NA	NA	NA	NA	NA	NA	NA	NA	NA	NA	NA	NA	NA	NA	NA	NA	NA	NA	NA	NA	NA	NA	NA	NA	NA	NA	TRB	HomoSapiens	IVTDFSVIK	EBNA4	EBV	458	TRBV19	TRBJ2-7	5	7	HLA-A*11:01	B2M	MHCI	https://www.10xgenomics.com/resources/application-notes/a-new-way-of-exploring-immunity-linking-highly-multiplexed-antigen-recognition-to-immune-repertoire-and-phenotype/#	0	HomoSapiens	TRB
312	CASSIRSSYEQYF	NA	4	4	NA	NA	NA	NA	NA	NA	NA	NA	NA	NA	NA	NA	NA	NA	NA	NA	NA	NA	NA	NA	NA	NA	NA	NA	NA	NA	NA	NA	TRB	HomoSapiens	IVTDFSVIK	EBNA4	EBV	458	TRBV19	TRBJ2-7	5	7	HLA-A*11:01	B2M	MHCI	https://www.10xgenomics.com/resources/application-notes/a-new-way-of-exploring-immunity-linking-highly-multiplexed-antigen-recognition-to-immune-repertoire-and-phenotype/#	0	HomoSapiens	TRB
313	CASSIRSSYEQYF	NA	4	4	NA	NA	NA	NA	NA	NA	NA	NA	NA	NA	NA	NA	NA	NA	NA	NA	NA	NA	NA	NA	NA	NA	NA	NA	NA	NA	NA	NA	TRB	HomoSapiens	IVTDFSVIK	EBNA4	EBV	458	TRBV19	TRBJ2-7	5	7	HLA-A*11:01	B2M	MHCI	https://www.10xgenomics.com/resources/application-notes/a-new-way-of-exploring-immunity-linking-highly-multiplexed-antigen-recognition-to-immune-repertoire-and-phenotype/#	0	HomoSapiens	TRB
314	CASSIRSSYEQYF	NA	4	4	NA	NA	NA	NA	NA	NA	NA	NA	NA	NA	NA	NA	NA	NA	NA	NA	NA	NA	NA	NA	NA	NA	NA	NA	NA	NA	NA	NA	TRB	HomoSapiens	IVTDFSVIK	EBNA4	EBV	458	TRBV19	TRBJ2-7	5	7	HLA-A*11:01	B2M	MHCI	https://www.10xgenomics.com/resources/application-notes/a-new-way-of-exploring-immunity-linking-highly-multiplexed-antigen-recognition-to-immune-repertoire-and-phenotype/#	0	HomoSapiens	TRB
315	CASSIRSSYEQYF	NA	4	4	NA	NA	NA	NA	NA	NA	NA	NA	NA	NA	NA	NA	NA	NA	NA	NA	NA	NA	NA	NA	NA	NA	NA	NA	NA	NA	NA	NA	TRB	HomoSapiens	IVTDFSVIK	EBNA4	EBV	458	TRBV19	TRBJ2-7	5	7	HLA-A*11:01	B2M	MHCI	https://www.10xgenomics.com/resources/application-notes/a-new-way-of-exploring-immunity-linking-highly-multiplexed-antigen-recognition-to-immune-repertoire-and-phenotype/#	0	HomoSapiens	TRB
316	CASSIRSSYEQYF	NA	4	4	NA	NA	NA	NA	NA	NA	NA	NA	NA	NA	NA	NA	NA	NA	NA	NA	NA	NA	NA	NA	NA	NA	NA	NA	NA	NA	NA	NA	TRB	HomoSapiens	IVTDFSVIK	EBNA4	EBV	458	TRBV19	TRBJ2-7	5	7	HLA-A*11:01	B2M	MHCI	https://www.10xgenomics.com/resources/application-notes/a-new-way-of-exploring-immunity-linking-highly-multiplexed-antigen-recognition-to-immune-repertoire-and-phenotype/#	0	HomoSapiens	TRB
317	CASSIRSSYEQYF	NA	4	4	NA	NA	NA	NA	NA	NA	NA	NA	NA	NA	NA	NA	NA	NA	NA	NA	NA	NA	NA	NA	NA	NA	NA	NA	NA	NA	NA	NA	TRB	HomoSapiens	IVTDFSVIK	EBNA4	EBV	458	TRBV19	TRBJ2-7	5	7	HLA-A*11:01	B2M	MHCI	https://www.10xgenomics.com/resources/application-notes/a-new-way-of-exploring-immunity-linking-highly-multiplexed-antigen-recognition-to-immune-repertoire-and-phenotype/#	0	HomoSapiens	TRB
318	CASSIRSSYEQYF	NA	4	4	NA	NA	NA	NA	NA	NA	NA	NA	NA	NA	NA	NA	NA	NA	NA	NA	NA	NA	NA	NA	NA	NA	NA	NA	NA	NA	NA	NA	TRB	HomoSapiens	IVTDFSVIK	EBNA4	EBV	458	TRBV19	TRBJ2-7	5	7	HLA-A*11:01	B2M	MHCI	https://www.10xgenomics.com/resources/application-notes/a-new-way-of-exploring-immunity-linking-highly-multiplexed-antigen-recognition-to-immune-repertoire-and-phenotype/#	0	HomoSapiens	TRB
319	CASSIRSSYEQYF	NA	4	4	NA	NA	NA	NA	NA	NA	NA	NA	NA	NA	NA	NA	NA	NA	NA	NA	NA	NA	NA	NA	NA	NA	NA	NA	NA	NA	NA	NA	TRB	HomoSapiens	IVTDFSVIK	EBNA4	EBV	458	TRBV19	TRBJ2-7	5	7	HLA-A*11:01	B2M	MHCI	https://www.10xgenomics.com/resources/application-notes/a-new-way-of-exploring-immunity-linking-highly-multiplexed-antigen-recognition-to-immune-repertoire-and-phenotype/#	0	HomoSapiens	TRB
320	CASSIRSSYEQYF	NA	4	4	NA	NA	NA	NA	NA	NA	NA	NA	NA	NA	NA	NA	NA	NA	NA	NA	NA	NA	NA	NA	NA	NA	NA	NA	NA	NA	NA	NA	TRB	HomoSapiens	IVTDFSVIK	EBNA4	EBV	458	TRBV19	TRBJ2-7	5	7	HLA-A*11:01	B2M	MHCI	https://www.10xgenomics.com/resources/application-notes/a-new-way-of-exploring-immunity-linking-highly-multiplexed-antigen-recognition-to-immune-repertoire-and-phenotype/#	0	HomoSapiens	TRB
321	CASSIRSSYEQYF	NA	4	4	NA	NA	NA	NA	NA	NA	NA	NA	NA	NA	NA	NA	NA	NA	NA	NA	NA	NA	NA	NA	NA	NA	NA	NA	NA	NA	NA	NA	TRB	HomoSapiens	IVTDFSVIK	EBNA4	EBV	458	TRBV19	TRBJ2-7	5	7	HLA-A*11:01	B2M	MHCI	https://www.10xgenomics.com/resources/application-notes/a-new-way-of-exploring-immunity-linking-highly-multiplexed-antigen-recognition-to-immune-repertoire-and-phenotype/#	0	HomoSapiens	TRB
322	CASSIRSSYEQYF	NA	4	4	NA	NA	NA	NA	NA	NA	NA	NA	NA	NA	NA	NA	NA	NA	NA	NA	NA	NA	NA	NA	NA	NA	NA	NA	NA	NA	NA	NA	TRB	HomoSapiens	IVTDFSVIK	EBNA4	EBV	458	TRBV19	TRBJ2-7	5	7	HLA-A*11:01	B2M	MHCI	https://www.10xgenomics.com/resources/application-notes/a-new-way-of-exploring-immunity-linking-highly-multiplexed-antigen-recognition-to-immune-repertoire-and-phenotype/#	0	HomoSapiens	TRB
323	CASSIRSSYEQYF	NA	4	4	NA	NA	NA	NA	NA	NA	NA	NA	NA	NA	NA	NA	NA	NA	NA	NA	NA	NA	NA	NA	NA	NA	NA	NA	NA	NA	NA	NA	TRB	HomoSapiens	IVTDFSVIK	EBNA4	EBV	458	TRBV19	TRBJ2-7	5	7	HLA-A*11:01	B2M	MHCI	https://www.10xgenomics.com/resources/application-notes/a-new-way-of-exploring-immunity-linking-highly-multiplexed-antigen-recognition-to-immune-repertoire-and-phenotype/#	0	HomoSapiens	TRB
324	CASSIRSSYEQYF	NA	4	4	NA	NA	NA	NA	NA	NA	NA	NA	NA	NA	NA	NA	NA	NA	NA	NA	NA	NA	NA	NA	NA	NA	NA	NA	NA	NA	NA	NA	TRB	HomoSapiens	IVTDFSVIK	EBNA4	EBV	458	TRBV19	TRBJ2-7	5	7	HLA-A*11:01	B2M	MHCI	https://www.10xgenomics.com/resources/application-notes/a-new-way-of-exploring-immunity-linking-highly-multiplexed-antigen-recognition-to-immune-repertoire-and-phenotype/#	0	HomoSapiens	TRB
325	CASSIRSSYEQYF	NA	4	4	NA	NA	NA	NA	NA	NA	NA	NA	NA	NA	NA	NA	NA	NA	NA	NA	NA	NA	NA	NA	NA	NA	NA	NA	NA	NA	NA	NA	TRB	HomoSapiens	IVTDFSVIK	EBNA4	EBV	458	TRBV19	TRBJ2-7	5	7	HLA-A*11:01	B2M	MHCI	https://www.10xgenomics.com/resources/application-notes/a-new-way-of-exploring-immunity-linking-highly-multiplexed-antigen-recognition-to-immune-repertoire-and-phenotype/#	0	HomoSapiens	TRB
326	CASSIRSSYEQYF	NA	4	4	NA	NA	NA	NA	NA	NA	NA	NA	NA	NA	NA	NA	NA	NA	NA	NA	NA	NA	NA	NA	NA	NA	NA	NA	NA	NA	NA	NA	TRB	HomoSapiens	IVTDFSVIK	EBNA4	EBV	458	TRBV19	TRBJ2-7	5	7	HLA-A*11:01	B2M	MHCI	https://www.10xgenomics.com/resources/application-notes/a-new-way-of-exploring-immunity-linking-highly-multiplexed-antigen-recognition-to-immune-repertoire-and-phenotype/#	0	HomoSapiens	TRB
327	CASSIRSSYEQYF	NA	4	4	NA	NA	NA	NA	NA	NA	NA	NA	NA	NA	NA	NA	NA	NA	NA	NA	NA	NA	NA	NA	NA	NA	NA	NA	NA	NA	NA	NA	TRB	HomoSapiens	IVTDFSVIK	EBNA4	EBV	458	TRBV19	TRBJ2-7	5	7	HLA-A*11:01	B2M	MHCI	https://www.10xgenomics.com/resources/application-notes/a-new-way-of-exploring-immunity-linking-highly-multiplexed-antigen-recognition-to-immune-repertoire-and-phenotype/#	0	HomoSapiens	TRB
328	CASSIRSSYEQYF	NA	4	4	NA	NA	NA	NA	NA	NA	NA	NA	NA	NA	NA	NA	NA	NA	NA	NA	NA	NA	NA	NA	NA	NA	NA	NA	NA	NA	NA	NA	TRB	HomoSapiens	IVTDFSVIK	EBNA4	EBV	458	TRBV19	TRBJ2-7	5	7	HLA-A*11:01	B2M	MHCI	https://www.10xgenomics.com/resources/application-notes/a-new-way-of-exploring-immunity-linking-highly-multiplexed-antigen-recognition-to-immune-repertoire-and-phenotype/#	0	HomoSapiens	TRB
329	CASSIRSSYEQYF	NA	4	4	NA	NA	NA	NA	NA	NA	NA	NA	NA	NA	NA	NA	NA	NA	NA	NA	NA	NA	NA	NA	NA	NA	NA	NA	NA	NA	NA	NA	TRB	HomoSapiens	IVTDFSVIK	EBNA4	EBV	458	TRBV19	TRBJ2-7	5	7	HLA-A*11:01	B2M	MHCI	https://www.10xgenomics.com/resources/application-notes/a-new-way-of-exploring-immunity-linking-highly-multiplexed-antigen-recognition-to-immune-repertoire-and-phenotype/#	0	HomoSapiens	TRB
330	CASSIRSSYEQYF	NA	4	4	NA	NA	NA	NA	NA	NA	NA	NA	NA	NA	NA	NA	NA	NA	NA	NA	NA	NA	NA	NA	NA	NA	NA	NA	NA	NA	NA	NA	TRB	HomoSapiens	IVTDFSVIK	EBNA4	EBV	458	TRBV19	TRBJ2-7	5	7	HLA-A*11:01	B2M	MHCI	https://www.10xgenomics.com/resources/application-notes/a-new-way-of-exploring-immunity-linking-highly-multiplexed-antigen-recognition-to-immune-repertoire-and-phenotype/#	0	HomoSapiens	TRB
331	CASSIRSSYEQYF	NA	4	4	NA	NA	NA	NA	NA	NA	NA	NA	NA	NA	NA	NA	NA	NA	NA	NA	NA	NA	NA	NA	NA	NA	NA	NA	NA	NA	NA	NA	TRB	HomoSapiens	IVTDFSVIK	EBNA4	EBV	458	TRBV19	TRBJ2-7	5	7	HLA-A*11:01	B2M	MHCI	https://www.10xgenomics.com/resources/application-notes/a-new-way-of-exploring-immunity-linking-highly-multiplexed-antigen-recognition-to-immune-repertoire-and-phenotype/#	0	HomoSapiens	TRB
332	CASSIRSSYEQYF	NA	4	4	NA	NA	NA	NA	NA	NA	NA	NA	NA	NA	NA	NA	NA	NA	NA	NA	NA	NA	NA	NA	NA	NA	NA	NA	NA	NA	NA	NA	TRB	HomoSapiens	AVFDRKSDAK	EBNA4	EBV	76047908353	TRBV19	TRBJ2-7	5	7	HLA-A*11:01	B2M	MHCI	https://www.10xgenomics.com/resources/application-notes/a-new-way-of-exploring-immunity-linking-highly-multiplexed-antigen-recognition-to-immune-repertoire-and-phenotype/#	0	HomoSapiens	TRB
333	CASSIRSSYEQYF	NA	4	4	NA	NA	NA	NA	NA	NA	NA	NA	NA	NA	NA	NA	NA	NA	NA	NA	NA	NA	NA	NA	NA	NA	NA	NA	NA	NA	NA	NA	TRB	HomoSapiens	AVFDRKSDAK	EBNA4	EBV	76047908353	TRBV19	TRBJ2-7	5	7	HLA-A*11:01	B2M	MHCI	https://www.10xgenomics.com/resources/application-notes/a-new-way-of-exploring-immunity-linking-highly-multiplexed-antigen-recognition-to-immune-repertoire-and-phenotype/#	0	HomoSapiens	TRB
334	CASSIRSSYEQYF	NA	4	4	NA	NA	NA	NA	NA	NA	NA	NA	NA	NA	NA	NA	NA	NA	NA	NA	NA	NA	NA	NA	NA	NA	NA	NA	NA	NA	NA	NA	TRB	HomoSapiens	AVFDRKSDAK	EBNA4	EBV	76047908353	TRBV19	TRBJ2-7	5	7	HLA-A*11:01	B2M	MHCI	https://www.10xgenomics.com/resources/application-notes/a-new-way-of-exploring-immunity-linking-highly-multiplexed-antigen-recognition-to-immune-repertoire-and-phenotype/#	0	HomoSapiens	TRB
335	CASSIRSSYEQYF	NA	4	4	NA	NA	NA	NA	NA	NA	NA	NA	NA	NA	NA	NA	NA	NA	NA	NA	NA	NA	NA	NA	NA	NA	NA	NA	NA	NA	NA	NA	TRB	HomoSapiens	AVFDRKSDAK	EBNA4	EBV	76047908353	TRBV19	TRBJ2-7	5	7	HLA-A*11:01	B2M	MHCI	https://www.10xgenomics.com/resources/application-notes/a-new-way-of-exploring-immunity-linking-highly-multiplexed-antigen-recognition-to-immune-repertoire-and-phenotype/#	0	HomoSapiens	TRB
336	CASSIRSSYEQYF	NA	4	4	NA	NA	NA	NA	NA	NA	NA	NA	NA	NA	NA	NA	NA	NA	NA	NA	NA	NA	NA	NA	NA	NA	NA	NA	NA	NA	NA	NA	TRB	HomoSapiens	AVFDRKSDAK	EBNA4	EBV	76047908353	TRBV19	TRBJ2-7	5	7	HLA-A*11:01	B2M	MHCI	https://www.10xgenomics.com/resources/application-notes/a-new-way-of-exploring-immunity-linking-highly-multiplexed-antigen-recognition-to-immune-repertoire-and-phenotype/#	0	HomoSapiens	TRB
337	CASSIRSSYEQYF	NA	4	4	NA	NA	NA	NA	NA	NA	NA	NA	NA	NA	NA	NA	NA	NA	NA	NA	NA	NA	NA	NA	NA	NA	NA	NA	NA	NA	NA	NA	TRB	HomoSapiens	AVFDRKSDAK	EBNA4	EBV	76047908353	TRBV19	TRBJ2-7	5	7	HLA-A*11:01	B2M	MHCI	https://www.10xgenomics.com/resources/application-notes/a-new-way-of-exploring-immunity-linking-highly-multiplexed-antigen-recognition-to-immune-repertoire-and-phenotype/#	0	HomoSapiens	TRB
338	CASSIRSSYEQYF	NA	4	4	NA	NA	NA	NA	NA	NA	NA	NA	NA	NA	NA	NA	NA	NA	NA	NA	NA	NA	NA	NA	NA	NA	NA	NA	NA	NA	NA	NA	TRB	HomoSapiens	AVFDRKSDAK	EBNA4	EBV	76047908353	TRBV19	TRBJ2-7	5	7	HLA-A*11:01	B2M	MHCI	https://www.10xgenomics.com/resources/application-notes/a-new-way-of-exploring-immunity-linking-highly-multiplexed-antigen-recognition-to-immune-repertoire-and-phenotype/#	0	HomoSapiens	TRB
339	CASSIRSSYEQYF	NA	4	4	NA	NA	NA	NA	NA	NA	NA	NA	NA	NA	NA	NA	NA	NA	NA	NA	NA	NA	NA	NA	NA	NA	NA	NA	NA	NA	NA	NA	TRB	HomoSapiens	AVFDRKSDAK	EBNA4	EBV	76047908353	TRBV19	TRBJ2-7	5	7	HLA-A*11:01	B2M	MHCI	https://www.10xgenomics.com/resources/application-notes/a-new-way-of-exploring-immunity-linking-highly-multiplexed-antigen-recognition-to-immune-repertoire-and-phenotype/#	0	HomoSapiens	TRB
340	CASSIRSSYEQYF	NA	4	4	NA	NA	NA	NA	NA	NA	NA	NA	NA	NA	NA	NA	NA	NA	NA	NA	NA	NA	NA	NA	NA	NA	NA	NA	NA	NA	NA	NA	TRB	HomoSapiens	AVFDRKSDAK	EBNA4	EBV	76047908353	TRBV19	TRBJ2-7	5	7	HLA-A*11:01	B2M	MHCI	https://www.10xgenomics.com/resources/application-notes/a-new-way-of-exploring-immunity-linking-highly-multiplexed-antigen-recognition-to-immune-repertoire-and-phenotype/#	0	HomoSapiens	TRB
341	CASSIRSSYEQYF	NA	4	4	NA	NA	NA	NA	NA	NA	NA	NA	NA	NA	NA	NA	NA	NA	NA	NA	NA	NA	NA	NA	NA	NA	NA	NA	NA	NA	NA	NA	TRB	HomoSapiens	AVFDRKSDAK	EBNA4	EBV	76047908353	TRBV19	TRBJ2-7	5	7	HLA-A*11:01	B2M	MHCI	https://www.10xgenomics.com/resources/application-notes/a-new-way-of-exploring-immunity-linking-highly-multiplexed-antigen-recognition-to-immune-repertoire-and-phenotype/#	0	HomoSapiens	TRB
342	CASSIRSSYEQYF	NA	4	4	NA	NA	NA	NA	NA	NA	NA	NA	NA	NA	NA	NA	NA	NA	NA	NA	NA	NA	NA	NA	NA	NA	NA	NA	NA	NA	NA	NA	TRB	HomoSapiens	AVFDRKSDAK	EBNA4	EBV	76047908353	TRBV19	TRBJ2-7	5	7	HLA-A*11:01	B2M	MHCI	https://www.10xgenomics.com/resources/application-notes/a-new-way-of-exploring-immunity-linking-highly-multiplexed-antigen-recognition-to-immune-repertoire-and-phenotype/#	0	HomoSapiens	TRB
343	CASSIRSSYEQYF	NA	4	4	NA	NA	NA	NA	NA	NA	NA	NA	NA	NA	NA	NA	NA	NA	NA	NA	NA	NA	NA	NA	NA	NA	NA	NA	NA	NA	NA	NA	TRB	HomoSapiens	AVFDRKSDAK	EBNA4	EBV	76047908353	TRBV19	TRBJ2-7	5	7	HLA-A*11:01	B2M	MHCI	https://www.10xgenomics.com/resources/application-notes/a-new-way-of-exploring-immunity-linking-highly-multiplexed-antigen-recognition-to-immune-repertoire-and-phenotype/#	0	HomoSapiens	TRB
344	CASSIRSSYEQYF	NA	4	4	NA	NA	NA	NA	NA	NA	NA	NA	NA	NA	NA	NA	NA	NA	NA	NA	NA	NA	NA	NA	NA	NA	NA	NA	NA	NA	NA	NA	TRB	HomoSapiens	AVFDRKSDAK	EBNA4	EBV	76047908353	TRBV19	TRBJ2-7	5	7	HLA-A*11:01	B2M	MHCI	https://www.10xgenomics.com/resources/application-notes/a-new-way-of-exploring-immunity-linking-highly-multiplexed-antigen-recognition-to-immune-repertoire-and-phenotype/#	0	HomoSapiens	TRB
345	CASSIRSSYEQYF	NA	4	4	NA	NA	NA	NA	NA	NA	NA	NA	NA	NA	NA	NA	NA	NA	NA	NA	NA	NA	NA	NA	NA	NA	NA	NA	NA	NA	NA	NA	TRB	HomoSapiens	AVFDRKSDAK	EBNA4	EBV	76047908353	TRBV19	TRBJ2-7	5	7	HLA-A*11:01	B2M	MHCI	https://www.10xgenomics.com/resources/application-notes/a-new-way-of-exploring-immunity-linking-highly-multiplexed-antigen-recognition-to-immune-repertoire-and-phenotype/#	0	HomoSapiens	TRB
346	CASSIRSSYEQYF	NA	4	4	NA	NA	NA	NA	NA	NA	NA	NA	NA	NA	NA	NA	NA	NA	NA	NA	NA	NA	NA	NA	NA	NA	NA	NA	NA	NA	NA	NA	TRB	HomoSapiens	AVFDRKSDAK	EBNA4	EBV	76047908353	TRBV19	TRBJ2-7	5	7	HLA-A*11:01	B2M	MHCI	https://www.10xgenomics.com/resources/application-notes/a-new-way-of-exploring-immunity-linking-highly-multiplexed-antigen-recognition-to-immune-repertoire-and-phenotype/#	0	HomoSapiens	TRB
347	CASSIRSSYEQYF	NA	4	4	NA	NA	NA	NA	NA	NA	NA	NA	NA	NA	NA	NA	NA	NA	NA	NA	NA	NA	NA	NA	NA	NA	NA	NA	NA	NA	NA	NA	TRB	HomoSapiens	AVFDRKSDAK	EBNA4	EBV	76047908353	TRBV19	TRBJ2-7	5	7	HLA-A*11:01	B2M	MHCI	https://www.10xgenomics.com/resources/application-notes/a-new-way-of-exploring-immunity-linking-highly-multiplexed-antigen-recognition-to-immune-repertoire-and-phenotype/#	0	HomoSapiens	TRB
348	CASSIRSSYEQYF	NA	4	4	NA	NA	NA	NA	NA	NA	NA	NA	NA	NA	NA	NA	NA	NA	NA	NA	NA	NA	NA	NA	NA	NA	NA	NA	NA	NA	NA	NA	TRB	HomoSapiens	AVFDRKSDAK	EBNA4	EBV	76047908353	TRBV19	TRBJ2-7	5	7	HLA-A*11:01	B2M	MHCI	https://www.10xgenomics.com/resources/application-notes/a-new-way-of-exploring-immunity-linking-highly-multiplexed-antigen-recognition-to-immune-repertoire-and-phenotype/#	0	HomoSapiens	TRB
349	CASSIRSSYEQYF	NA	4	4	NA	NA	NA	NA	NA	NA	NA	NA	NA	NA	NA	NA	NA	NA	NA	NA	NA	NA	NA	NA	NA	NA	NA	NA	NA	NA	NA	NA	TRB	HomoSapiens	AVFDRKSDAK	EBNA4	EBV	76047908353	TRBV19	TRBJ2-7	5	7	HLA-A*11:01	B2M	MHCI	https://www.10xgenomics.com/resources/application-notes/a-new-way-of-exploring-immunity-linking-highly-multiplexed-antigen-recognition-to-immune-repertoire-and-phenotype/#	0	HomoSapiens	TRB
350	CASSIRSSYEQYF	NA	4	4	NA	NA	NA	NA	NA	NA	NA	NA	NA	NA	NA	NA	NA	NA	NA	NA	NA	NA	NA	NA	NA	NA	NA	NA	NA	NA	NA	NA	TRB	HomoSapiens	AVFDRKSDAK	EBNA4	EBV	76047908353	TRBV19	TRBJ2-7	5	7	HLA-A*11:01	B2M	MHCI	https://www.10xgenomics.com/resources/application-notes/a-new-way-of-exploring-immunity-linking-highly-multiplexed-antigen-recognition-to-immune-repertoire-and-phenotype/#	0	HomoSapiens	TRB
351	CASSIRSSYEQYF	NA	4	4	NA	NA	NA	NA	NA	NA	NA	NA	NA	NA	NA	NA	NA	NA	NA	NA	NA	NA	NA	NA	NA	NA	NA	NA	NA	NA	NA	NA	TRB	HomoSapiens	AVFDRKSDAK	EBNA4	EBV	76047908353	TRBV19	TRBJ2-7	5	7	HLA-A*11:01	B2M	MHCI	https://www.10xgenomics.com/resources/application-notes/a-new-way-of-exploring-immunity-linking-highly-multiplexed-antigen-recognition-to-immune-repertoire-and-phenotype/#	0	HomoSapiens	TRB
352	CASSIRSSYEQYF	NA	4	4	NA	NA	NA	NA	NA	NA	NA	NA	NA	NA	NA	NA	NA	NA	NA	NA	NA	NA	NA	NA	NA	NA	NA	NA	NA	NA	NA	NA	TRB	HomoSapiens	AVFDRKSDAK	EBNA4	EBV	76047908353	TRBV19	TRBJ2-7	5	7	HLA-A*11:01	B2M	MHCI	https://www.10xgenomics.com/resources/application-notes/a-new-way-of-exploring-immunity-linking-highly-multiplexed-antigen-recognition-to-immune-repertoire-and-phenotype/#	0	HomoSapiens	TRB
353	CASSIRSSYEQYF	NA	4	4	NA	NA	NA	NA	NA	NA	NA	NA	NA	NA	NA	NA	NA	NA	NA	NA	NA	NA	NA	NA	NA	NA	NA	NA	NA	NA	NA	NA	TRB	HomoSapiens	AVFDRKSDAK	EBNA4	EBV	76047908353	TRBV19	TRBJ2-7	5	7	HLA-A*11:01	B2M	MHCI	https://www.10xgenomics.com/resources/application-notes/a-new-way-of-exploring-immunity-linking-highly-multiplexed-antigen-recognition-to-immune-repertoire-and-phenotype/#	0	HomoSapiens	TRB
354	CASSIRSSYEQYF	NA	4	4	NA	NA	NA	NA	NA	NA	NA	NA	NA	NA	NA	NA	NA	NA	NA	NA	NA	NA	NA	NA	NA	NA	NA	NA	NA	NA	NA	NA	TRB	HomoSapiens	AVFDRKSDAK	EBNA4	EBV	76047908353	TRBV19	TRBJ2-7	5	7	HLA-A*11:01	B2M	MHCI	https://www.10xgenomics.com/resources/application-notes/a-new-way-of-exploring-immunity-linking-highly-multiplexed-antigen-recognition-to-immune-repertoire-and-phenotype/#	0	HomoSapiens	TRB
355	CASSIRSSYEQYF	NA	4	4	NA	NA	NA	NA	NA	NA	NA	NA	NA	NA	NA	NA	NA	NA	NA	NA	NA	NA	NA	NA	NA	NA	NA	NA	NA	NA	NA	NA	TRB	HomoSapiens	AVFDRKSDAK	EBNA4	EBV	76047908353	TRBV19	TRBJ2-7	5	7	HLA-A*11:01	B2M	MHCI	https://www.10xgenomics.com/resources/application-notes/a-new-way-of-exploring-immunity-linking-highly-multiplexed-antigen-recognition-to-immune-repertoire-and-phenotype/#	0	HomoSapiens	TRB
356	CASSIRSSYEQYF	NA	4	4	NA	NA	NA	NA	NA	NA	NA	NA	NA	NA	NA	NA	NA	NA	NA	NA	NA	NA	NA	NA	NA	NA	NA	NA	NA	NA	NA	NA	TRB	HomoSapiens	AVFDRKSDAK	EBNA4	EBV	76047908353	TRBV19	TRBJ2-7	5	7	HLA-A*11:01	B2M	MHCI	https://www.10xgenomics.com/resources/application-notes/a-new-way-of-exploring-immunity-linking-highly-multiplexed-antigen-recognition-to-immune-repertoire-and-phenotype/#	0	HomoSapiens	TRB
357	CASSIRSSYEQYF	NA	4	4	NA	NA	NA	NA	NA	NA	NA	NA	NA	NA	NA	NA	NA	NA	NA	NA	NA	NA	NA	NA	NA	NA	NA	NA	NA	NA	NA	NA	TRB	HomoSapiens	AVFDRKSDAK	EBNA4	EBV	76047908353	TRBV19	TRBJ2-7	5	7	HLA-A*11:01	B2M	MHCI	https://www.10xgenomics.com/resources/application-notes/a-new-way-of-exploring-immunity-linking-highly-multiplexed-antigen-recognition-to-immune-repertoire-and-phenotype/#	0	HomoSapiens	TRB
358	CASSIRSSYEQYF	NA	4	4	NA	NA	NA	NA	NA	NA	NA	NA	NA	NA	NA	NA	NA	NA	NA	NA	NA	NA	NA	NA	NA	NA	NA	NA	NA	NA	NA	NA	TRB	HomoSapiens	AVFDRKSDAK	EBNA4	EBV	76047908353	TRBV19	TRBJ2-7	5	7	HLA-A*11:01	B2M	MHCI	https://www.10xgenomics.com/resources/application-notes/a-new-way-of-exploring-immunity-linking-highly-multiplexed-antigen-recognition-to-immune-repertoire-and-phenotype/#	0	HomoSapiens	TRB
359	CASSIRSSYEQYF	NA	4	4	NA	NA	NA	NA	NA	NA	NA	NA	NA	NA	NA	NA	NA	NA	NA	NA	NA	NA	NA	NA	NA	NA	NA	NA	NA	NA	NA	NA	TRB	HomoSapiens	AVFDRKSDAK	EBNA4	EBV	76047908353	TRBV19	TRBJ2-7	5	7	HLA-A*11:01	B2M	MHCI	https://www.10xgenomics.com/resources/application-notes/a-new-way-of-exploring-immunity-linking-highly-multiplexed-antigen-recognition-to-immune-repertoire-and-phenotype/#	0	HomoSapiens	TRB
360	CASSIRSSYEQYF	NA	4	4	NA	NA	NA	NA	NA	NA	NA	NA	NA	NA	NA	NA	NA	NA	NA	NA	NA	NA	NA	NA	NA	NA	NA	NA	NA	NA	NA	NA	TRB	HomoSapiens	AVFDRKSDAK	EBNA4	EBV	76047908353	TRBV19	TRBJ2-7	5	7	HLA-A*11:01	B2M	MHCI	https://www.10xgenomics.com/resources/application-notes/a-new-way-of-exploring-immunity-linking-highly-multiplexed-antigen-recognition-to-immune-repertoire-and-phenotype/#	0	HomoSapiens	TRB
361	CASSIRSSYEQYF	NA	4	4	NA	NA	NA	NA	NA	NA	NA	NA	NA	NA	NA	NA	NA	NA	NA	NA	NA	NA	NA	NA	NA	NA	NA	NA	NA	NA	NA	NA	TRB	HomoSapiens	AVFDRKSDAK	EBNA4	EBV	76047908353	TRBV19	TRBJ2-7	5	7	HLA-A*11:01	B2M	MHCI	https://www.10xgenomics.com/resources/application-notes/a-new-way-of-exploring-immunity-linking-highly-multiplexed-antigen-recognition-to-immune-repertoire-and-phenotype/#	0	HomoSapiens	TRB
362	CASSIRSSYEQYF	NA	4	4	NA	NA	NA	NA	NA	NA	NA	NA	NA	NA	NA	NA	NA	NA	NA	NA	NA	NA	NA	NA	NA	NA	NA	NA	NA	NA	NA	NA	TRB	HomoSapiens	AVFDRKSDAK	EBNA4	EBV	76047908353	TRBV19	TRBJ2-7	5	7	HLA-A*11:01	B2M	MHCI	https://www.10xgenomics.com/resources/application-notes/a-new-way-of-exploring-immunity-linking-highly-multiplexed-antigen-recognition-to-immune-repertoire-and-phenotype/#	0	HomoSapiens	TRB
363	CASSIRSSYEQYF	NA	4	4	NA	NA	NA	NA	NA	NA	NA	NA	NA	NA	NA	NA	NA	NA	NA	NA	NA	NA	NA	NA	NA	NA	NA	NA	NA	NA	NA	NA	TRB	HomoSapiens	AVFDRKSDAK	EBNA4	EBV	76047908353	TRBV19	TRBJ2-7	5	7	HLA-A*11:01	B2M	MHCI	https://www.10xgenomics.com/resources/application-notes/a-new-way-of-exploring-immunity-linking-highly-multiplexed-antigen-recognition-to-immune-repertoire-and-phenotype/#	0	HomoSapiens	TRB
364	CASSIRSSYEQYF	NA	4	4	NA	NA	NA	NA	NA	NA	NA	NA	NA	NA	NA	NA	NA	NA	NA	NA	NA	NA	NA	NA	NA	NA	NA	NA	NA	NA	NA	NA	TRB	HomoSapiens	AVFDRKSDAK	EBNA4	EBV	76047908353	TRBV19	TRBJ2-7	5	7	HLA-A*11:01	B2M	MHCI	https://www.10xgenomics.com/resources/application-notes/a-new-way-of-exploring-immunity-linking-highly-multiplexed-antigen-recognition-to-immune-repertoire-and-phenotype/#	0	HomoSapiens	TRB
365	CASSIRSSYEQYF	NA	4	4	NA	NA	NA	NA	NA	NA	NA	NA	NA	NA	NA	NA	NA	NA	NA	NA	NA	NA	NA	NA	NA	NA	NA	NA	NA	NA	NA	NA	TRB	HomoSapiens	AVFDRKSDAK	EBNA4	EBV	76047908353	TRBV19	TRBJ2-7	5	7	HLA-A*11:01	B2M	MHCI	https://www.10xgenomics.com/resources/application-notes/a-new-way-of-exploring-immunity-linking-highly-multiplexed-antigen-recognition-to-immune-repertoire-and-phenotype/#	0	HomoSapiens	TRB
366	CASSIRSSYEQYF	NA	4	4	NA	NA	NA	NA	NA	NA	NA	NA	NA	NA	NA	NA	NA	NA	NA	NA	NA	NA	NA	NA	NA	NA	NA	NA	NA	NA	NA	NA	TRB	HomoSapiens	AVFDRKSDAK	EBNA4	EBV	76047908353	TRBV19	TRBJ2-7	5	7	HLA-A*11:01	B2M	MHCI	https://www.10xgenomics.com/resources/application-notes/a-new-way-of-exploring-immunity-linking-highly-multiplexed-antigen-recognition-to-immune-repertoire-and-phenotype/#	0	HomoSapiens	TRB
367	CASSIRSSYEQYF	NA	4	4	NA	NA	NA	NA	NA	NA	NA	NA	NA	NA	NA	NA	NA	NA	NA	NA	NA	NA	NA	NA	NA	NA	NA	NA	NA	NA	NA	NA	TRB	HomoSapiens	AVFDRKSDAK	EBNA4	EBV	76047908353	TRBV19	TRBJ2-7	5	7	HLA-A*11:01	B2M	MHCI	https://www.10xgenomics.com/resources/application-notes/a-new-way-of-exploring-immunity-linking-highly-multiplexed-antigen-recognition-to-immune-repertoire-and-phenotype/#	0	HomoSapiens	TRB
368	CASSIRSSYEQYF	NA	4	4	NA	NA	NA	NA	NA	NA	NA	NA	NA	NA	NA	NA	NA	NA	NA	NA	NA	NA	NA	NA	NA	NA	NA	NA	NA	NA	NA	NA	TRB	HomoSapiens	AVFDRKSDAK	EBNA4	EBV	76047908353	TRBV19	TRBJ2-7	5	7	HLA-A*11:01	B2M	MHCI	https://www.10xgenomics.com/resources/application-notes/a-new-way-of-exploring-immunity-linking-highly-multiplexed-antigen-recognition-to-immune-repertoire-and-phenotype/#	0	HomoSapiens	TRB
369	CASSIRSSYEQYF	NA	4	4	NA	NA	NA	NA	NA	NA	NA	NA	NA	NA	NA	NA	NA	NA	NA	NA	NA	NA	NA	NA	NA	NA	NA	NA	NA	NA	NA	NA	TRB	HomoSapiens	AVFDRKSDAK	EBNA4	EBV	76047908353	TRBV19	TRBJ2-7	5	7	HLA-A*11:01	B2M	MHCI	https://www.10xgenomics.com/resources/application-notes/a-new-way-of-exploring-immunity-linking-highly-multiplexed-antigen-recognition-to-immune-repertoire-and-phenotype/#	0	HomoSapiens	TRB
370	CASSIRSSYEQYF	NA	4	4	NA	NA	NA	NA	NA	NA	NA	NA	NA	NA	NA	NA	NA	NA	NA	NA	NA	NA	NA	NA	NA	NA	NA	NA	NA	NA	NA	NA	TRB	HomoSapiens	KLGGALQAK	IE1	CMV	30113797	TRBV19	TRBJ2-7	5	7	HLA-A*03:01	B2M	MHCI	https://www.10xgenomics.com/resources/application-notes/a-new-way-of-exploring-immunity-linking-highly-multiplexed-antigen-recognition-to-immune-repertoire-and-phenotype/#	0	HomoSapiens	TRB
371	CASSIRSSYEQYF	NA	4	4	NA	NA	NA	NA	NA	NA	NA	NA	NA	NA	NA	NA	NA	NA	NA	NA	NA	NA	NA	NA	NA	NA	NA	NA	NA	NA	NA	NA	TRB	HomoSapiens	KLGGALQAK	IE1	CMV	30113797	TRBV19	TRBJ2-7	5	7	HLA-A*03:01	B2M	MHCI	https://www.10xgenomics.com/resources/application-notes/a-new-way-of-exploring-immunity-linking-highly-multiplexed-antigen-recognition-to-immune-repertoire-and-phenotype/#	0	HomoSapiens	TRB
372	CASSIRSSYEQYF	NA	4	4	NA	NA	NA	NA	NA	NA	NA	NA	NA	NA	NA	NA	NA	NA	NA	NA	NA	NA	NA	NA	NA	NA	NA	NA	NA	NA	NA	NA	TRB	HomoSapiens	KLGGALQAK	IE1	CMV	30113797	TRBV19	TRBJ2-7	5	7	HLA-A*03:01	B2M	MHCI	https://www.10xgenomics.com/resources/application-notes/a-new-way-of-exploring-immunity-linking-highly-multiplexed-antigen-recognition-to-immune-repertoire-and-phenotype/#	0	HomoSapiens	TRB
373	CASSIRSSYEQYF	NA	4	4	NA	NA	NA	NA	NA	NA	NA	NA	NA	NA	NA	NA	NA	NA	NA	NA	NA	NA	NA	NA	NA	NA	NA	NA	NA	NA	NA	NA	TRB	HomoSapiens	KLGGALQAK	IE1	CMV	30113797	TRBV19	TRBJ2-7	5	7	HLA-A*03:01	B2M	MHCI	https://www.10xgenomics.com/resources/application-notes/a-new-way-of-exploring-immunity-linking-highly-multiplexed-antigen-recognition-to-immune-repertoire-and-phenotype/#	0	HomoSapiens	TRB
374	CASSIRSSYEQYF	NA	4	4	NA	NA	NA	NA	NA	NA	NA	NA	NA	NA	NA	NA	NA	NA	NA	NA	NA	NA	NA	NA	NA	NA	NA	NA	NA	NA	NA	NA	TRB	HomoSapiens	KLGGALQAK	IE1	CMV	30113797	TRBV19	TRBJ2-7	5	7	HLA-A*03:01	B2M	MHCI	https://www.10xgenomics.com/resources/application-notes/a-new-way-of-exploring-immunity-linking-highly-multiplexed-antigen-recognition-to-immune-repertoire-and-phenotype/#	0	HomoSapiens	TRB
375	CASSIRSSYEQYF	NA	4	4	NA	NA	NA	NA	NA	NA	NA	NA	NA	NA	NA	NA	NA	NA	NA	NA	NA	NA	NA	NA	NA	NA	NA	NA	NA	NA	NA	NA	TRB	HomoSapiens	KLGGALQAK	IE1	CMV	30113797	TRBV19	TRBJ2-7	5	7	HLA-A*03:01	B2M	MHCI	https://www.10xgenomics.com/resources/application-notes/a-new-way-of-exploring-immunity-linking-highly-multiplexed-antigen-recognition-to-immune-repertoire-and-phenotype/#	0	HomoSapiens	TRB
376	CASSIRSSYEQYF	NA	4	4	NA	NA	NA	NA	NA	NA	NA	NA	NA	NA	NA	NA	NA	NA	NA	NA	NA	NA	NA	NA	NA	NA	NA	NA	NA	NA	NA	NA	TRB	HomoSapiens	KLGGALQAK	IE1	CMV	30113797	TRBV19	TRBJ2-7	5	7	HLA-A*03:01	B2M	MHCI	https://www.10xgenomics.com/resources/application-notes/a-new-way-of-exploring-immunity-linking-highly-multiplexed-antigen-recognition-to-immune-repertoire-and-phenotype/#	0	HomoSapiens	TRB
377	CASSIRSSYEQYF	NA	4	4	NA	NA	NA	NA	NA	NA	NA	NA	NA	NA	NA	NA	NA	NA	NA	NA	NA	NA	NA	NA	NA	NA	NA	NA	NA	NA	NA	NA	TRB	HomoSapiens	KLGGALQAK	IE1	CMV	30113797	TRBV19	TRBJ2-7	5	7	HLA-A*03:01	B2M	MHCI	https://www.10xgenomics.com/resources/application-notes/a-new-way-of-exploring-immunity-linking-highly-multiplexed-antigen-recognition-to-immune-repertoire-and-phenotype/#	0	HomoSapiens	TRB
378	CASSIRSSYEQYF	NA	4	4	NA	NA	NA	NA	NA	NA	NA	NA	NA	NA	NA	NA	NA	NA	NA	NA	NA	NA	NA	NA	NA	NA	NA	NA	NA	NA	NA	NA	TRB	HomoSapiens	KLGGALQAK	IE1	CMV	30113797	TRBV19	TRBJ2-7	5	7	HLA-A*03:01	B2M	MHCI	https://www.10xgenomics.com/resources/application-notes/a-new-way-of-exploring-immunity-linking-highly-multiplexed-antigen-recognition-to-immune-repertoire-and-phenotype/#	0	HomoSapiens	TRB
379	CASSIRSSYEQYF	NA	4	4	NA	NA	NA	NA	NA	NA	NA	NA	NA	NA	NA	NA	NA	NA	NA	NA	NA	NA	NA	NA	NA	NA	NA	NA	NA	NA	NA	NA	TRB	HomoSapiens	KLGGALQAK	IE1	CMV	30113797	TRBV19	TRBJ2-7	5	7	HLA-A*03:01	B2M	MHCI	https://www.10xgenomics.com/resources/application-notes/a-new-way-of-exploring-immunity-linking-highly-multiplexed-antigen-recognition-to-immune-repertoire-and-phenotype/#	0	HomoSapiens	TRB
380	CASSIRSSYEQYF	NA	4	4	NA	NA	NA	NA	NA	NA	NA	NA	NA	NA	NA	NA	NA	NA	NA	NA	NA	NA	NA	NA	NA	NA	NA	NA	NA	NA	NA	NA	TRB	HomoSapiens	KLGGALQAK	IE1	CMV	30113797	TRBV19	TRBJ2-7	5	7	HLA-A*03:01	B2M	MHCI	https://www.10xgenomics.com/resources/application-notes/a-new-way-of-exploring-immunity-linking-highly-multiplexed-antigen-recognition-to-immune-repertoire-and-phenotype/#	0	HomoSapiens	TRB
381	CASSIRSSYEQYF	NA	4	4	NA	NA	NA	NA	NA	NA	NA	NA	NA	NA	NA	NA	NA	NA	NA	NA	NA	NA	NA	NA	NA	NA	NA	NA	NA	NA	NA	NA	TRB	HomoSapiens	KLGGALQAK	IE1	CMV	30113797	TRBV19	TRBJ2-7	5	7	HLA-A*03:01	B2M	MHCI	https://www.10xgenomics.com/resources/application-notes/a-new-way-of-exploring-immunity-linking-highly-multiplexed-antigen-recognition-to-immune-repertoire-and-phenotype/#	0	HomoSapiens	TRB
382	CASSIRSSYEQYF	NA	4	4	NA	NA	NA	NA	NA	NA	NA	NA	NA	NA	NA	NA	NA	NA	NA	NA	NA	NA	NA	NA	NA	NA	NA	NA	NA	NA	NA	NA	TRB	HomoSapiens	KLGGALQAK	IE1	CMV	30113797	TRBV19	TRBJ2-7	5	7	HLA-A*03:01	B2M	MHCI	https://www.10xgenomics.com/resources/application-notes/a-new-way-of-exploring-immunity-linking-highly-multiplexed-antigen-recognition-to-immune-repertoire-and-phenotype/#	0	HomoSapiens	TRB
383	CASSIRSSYEQYF	NA	4	4	NA	NA	NA	NA	NA	NA	NA	NA	NA	NA	NA	NA	NA	NA	NA	NA	NA	NA	NA	NA	NA	NA	NA	NA	NA	NA	NA	NA	TRB	HomoSapiens	KLGGALQAK	IE1	CMV	30113797	TRBV19	TRBJ2-7	5	7	HLA-A*03:01	B2M	MHCI	https://www.10xgenomics.com/resources/application-notes/a-new-way-of-exploring-immunity-linking-highly-multiplexed-antigen-recognition-to-immune-repertoire-and-phenotype/#	0	HomoSapiens	TRB
384	CASSIRSSYEQYF	NA	4	4	NA	NA	NA	NA	NA	NA	NA	NA	NA	NA	NA	NA	NA	NA	NA	NA	NA	NA	NA	NA	NA	NA	NA	NA	NA	NA	NA	NA	TRB	HomoSapiens	KLGGALQAK	IE1	CMV	30113797	TRBV19	TRBJ2-7	5	7	HLA-A*03:01	B2M	MHCI	https://www.10xgenomics.com/resources/application-notes/a-new-way-of-exploring-immunity-linking-highly-multiplexed-antigen-recognition-to-immune-repertoire-and-phenotype/#	0	HomoSapiens	TRB
385	CASSIRSSYEQYF	NA	4	4	NA	NA	NA	NA	NA	NA	NA	NA	NA	NA	NA	NA	NA	NA	NA	NA	NA	NA	NA	NA	NA	NA	NA	NA	NA	NA	NA	NA	TRB	HomoSapiens	KLGGALQAK	IE1	CMV	30113797	TRBV19	TRBJ2-7	5	7	HLA-A*03:01	B2M	MHCI	https://www.10xgenomics.com/resources/application-notes/a-new-way-of-exploring-immunity-linking-highly-multiplexed-antigen-recognition-to-immune-repertoire-and-phenotype/#	0	HomoSapiens	TRB
386	CASSIRSSYEQYF	NA	4	4	NA	NA	NA	NA	NA	NA	NA	NA	NA	NA	NA	NA	NA	NA	NA	NA	NA	NA	NA	NA	NA	NA	NA	NA	NA	NA	NA	NA	TRB	HomoSapiens	KLGGALQAK	IE1	CMV	30113797	TRBV19	TRBJ2-7	5	7	HLA-A*03:01	B2M	MHCI	https://www.10xgenomics.com/resources/application-notes/a-new-way-of-exploring-immunity-linking-highly-multiplexed-antigen-recognition-to-immune-repertoire-and-phenotype/#	0	HomoSapiens	TRB
387	CASSIRSSYEQYF	NA	4	4	NA	NA	NA	NA	NA	NA	NA	NA	NA	NA	NA	NA	NA	NA	NA	NA	NA	NA	NA	NA	NA	NA	NA	NA	NA	NA	NA	NA	TRB	HomoSapiens	KLGGALQAK	IE1	CMV	30113797	TRBV19	TRBJ2-7	5	7	HLA-A*03:01	B2M	MHCI	https://www.10xgenomics.com/resources/application-notes/a-new-way-of-exploring-immunity-linking-highly-multiplexed-antigen-recognition-to-immune-repertoire-and-phenotype/#	0	HomoSapiens	TRB
388	CASSIRSSYEQYF	NA	4	4	NA	NA	NA	NA	NA	NA	NA	NA	NA	NA	NA	NA	NA	NA	NA	NA	NA	NA	NA	NA	NA	NA	NA	NA	NA	NA	NA	NA	TRB	HomoSapiens	KLGGALQAK	IE1	CMV	30113797	TRBV19	TRBJ2-7	5	7	HLA-A*03:01	B2M	MHCI	https://www.10xgenomics.com/resources/application-notes/a-new-way-of-exploring-immunity-linking-highly-multiplexed-antigen-recognition-to-immune-repertoire-and-phenotype/#	0	HomoSapiens	TRB
389	CASSIRSSYEQYF	NA	4	4	NA	NA	NA	NA	NA	NA	NA	NA	NA	NA	NA	NA	NA	NA	NA	NA	NA	NA	NA	NA	NA	NA	NA	NA	NA	NA	NA	NA	TRB	HomoSapiens	KLGGALQAK	IE1	CMV	30113797	TRBV19	TRBJ2-7	5	7	HLA-A*03:01	B2M	MHCI	https://www.10xgenomics.com/resources/application-notes/a-new-way-of-exploring-immunity-linking-highly-multiplexed-antigen-recognition-to-immune-repertoire-and-phenotype/#	0	HomoSapiens	TRB
390	CASSIRSSYEQYF	NA	4	4	NA	NA	NA	NA	NA	NA	NA	NA	NA	NA	NA	NA	NA	NA	NA	NA	NA	NA	NA	NA	NA	NA	NA	NA	NA	NA	NA	NA	TRB	HomoSapiens	KLGGALQAK	IE1	CMV	30113797	TRBV19	TRBJ2-7	5	7	HLA-A*03:01	B2M	MHCI	https://www.10xgenomics.com/resources/application-notes/a-new-way-of-exploring-immunity-linking-highly-multiplexed-antigen-recognition-to-immune-repertoire-and-phenotype/#	0	HomoSapiens	TRB
391	CASSIRSSYEQYF	NA	4	4	NA	NA	NA	NA	NA	NA	NA	NA	NA	NA	NA	NA	NA	NA	NA	NA	NA	NA	NA	NA	NA	NA	NA	NA	NA	NA	NA	NA	TRB	HomoSapiens	KLGGALQAK	IE1	CMV	30113797	TRBV19	TRBJ2-7	5	7	HLA-A*03:01	B2M	MHCI	https://www.10xgenomics.com/resources/application-notes/a-new-way-of-exploring-immunity-linking-highly-multiplexed-antigen-recognition-to-immune-repertoire-and-phenotype/#	0	HomoSapiens	TRB
392	CASSIRSSYEQYF	NA	4	4	NA	NA	NA	NA	NA	NA	NA	NA	NA	NA	NA	NA	NA	NA	NA	NA	NA	NA	NA	NA	NA	NA	NA	NA	NA	NA	NA	NA	TRB	HomoSapiens	KLGGALQAK	IE1	CMV	30113797	TRBV19	TRBJ2-7	5	7	HLA-A*03:01	B2M	MHCI	https://www.10xgenomics.com/resources/application-notes/a-new-way-of-exploring-immunity-linking-highly-multiplexed-antigen-recognition-to-immune-repertoire-and-phenotype/#	0	HomoSapiens	TRB
393	CASSIRSSYEQYF	NA	4	4	NA	NA	NA	NA	NA	NA	NA	NA	NA	NA	NA	NA	NA	NA	NA	NA	NA	NA	NA	NA	NA	NA	NA	NA	NA	NA	NA	NA	TRB	HomoSapiens	KLGGALQAK	IE1	CMV	30113797	TRBV19	TRBJ2-7	5	7	HLA-A*03:01	B2M	MHCI	https://www.10xgenomics.com/resources/application-notes/a-new-way-of-exploring-immunity-linking-highly-multiplexed-antigen-recognition-to-immune-repertoire-and-phenotype/#	0	HomoSapiens	TRB
394	CASSIRSSYEQYF	NA	4	4	NA	NA	NA	NA	NA	NA	NA	NA	NA	NA	NA	NA	NA	NA	NA	NA	NA	NA	NA	NA	NA	NA	NA	NA	NA	NA	NA	NA	TRB	HomoSapiens	KLGGALQAK	IE1	CMV	30113797	TRBV19	TRBJ2-7	5	7	HLA-A*03:01	B2M	MHCI	https://www.10xgenomics.com/resources/application-notes/a-new-way-of-exploring-immunity-linking-highly-multiplexed-antigen-recognition-to-immune-repertoire-and-phenotype/#	0	HomoSapiens	TRB
395	CASSIRSSYEQYF	NA	4	4	NA	NA	NA	NA	NA	NA	NA	NA	NA	NA	NA	NA	NA	NA	NA	NA	NA	NA	NA	NA	NA	NA	NA	NA	NA	NA	NA	NA	TRB	HomoSapiens	KLGGALQAK	IE1	CMV	30113797	TRBV19	TRBJ2-7	5	7	HLA-A*03:01	B2M	MHCI	https://www.10xgenomics.com/resources/application-notes/a-new-way-of-exploring-immunity-linking-highly-multiplexed-antigen-recognition-to-immune-repertoire-and-phenotype/#	0	HomoSapiens	TRB
396	CASSIRSSYEQYF	NA	4	4	NA	NA	NA	NA	NA	NA	NA	NA	NA	NA	NA	NA	NA	NA	NA	NA	NA	NA	NA	NA	NA	NA	NA	NA	NA	NA	NA	NA	TRB	HomoSapiens	KLGGALQAK	IE1	CMV	30113797	TRBV19	TRBJ2-7	5	7	HLA-A*03:01	B2M	MHCI	https://www.10xgenomics.com/resources/application-notes/a-new-way-of-exploring-immunity-linking-highly-multiplexed-antigen-recognition-to-immune-repertoire-and-phenotype/#	0	HomoSapiens	TRB
397	CASSIRSSYEQYF	NA	4	4	NA	NA	NA	NA	NA	NA	NA	NA	NA	NA	NA	NA	NA	NA	NA	NA	NA	NA	NA	NA	NA	NA	NA	NA	NA	NA	NA	NA	TRB	HomoSapiens	KLGGALQAK	IE1	CMV	30113797	TRBV19	TRBJ2-7	5	7	HLA-A*03:01	B2M	MHCI	https://www.10xgenomics.com/resources/application-notes/a-new-way-of-exploring-immunity-linking-highly-multiplexed-antigen-recognition-to-immune-repertoire-and-phenotype/#	0	HomoSapiens	TRB
398	CASSIRSSYEQYF	NA	4	4	NA	NA	NA	NA	NA	NA	NA	NA	NA	NA	NA	NA	NA	NA	NA	NA	NA	NA	NA	NA	NA	NA	NA	NA	NA	NA	NA	NA	TRB	HomoSapiens	KLGGALQAK	IE1	CMV	30113797	TRBV19	TRBJ2-7	5	7	HLA-A*03:01	B2M	MHCI	https://www.10xgenomics.com/resources/application-notes/a-new-way-of-exploring-immunity-linking-highly-multiplexed-antigen-recognition-to-immune-repertoire-and-phenotype/#	0	HomoSapiens	TRB
399	CASSIRSSYEQYF	NA	4	4	NA	NA	NA	NA	NA	NA	NA	NA	NA	NA	NA	NA	NA	NA	NA	NA	NA	NA	NA	NA	NA	NA	NA	NA	NA	NA	NA	NA	TRB	HomoSapiens	KLGGALQAK	IE1	CMV	30113797	TRBV19	TRBJ2-7	5	7	HLA-A*03:01	B2M	MHCI	https://www.10xgenomics.com/resources/application-notes/a-new-way-of-exploring-immunity-linking-highly-multiplexed-antigen-recognition-to-immune-repertoire-and-phenotype/#	0	HomoSapiens	TRB
400	CASSIRSSYEQYF	NA	4	4	NA	NA	NA	NA	NA	NA	NA	NA	NA	NA	NA	NA	NA	NA	NA	NA	NA	NA	NA	NA	NA	NA	NA	NA	NA	NA	NA	NA	TRB	HomoSapiens	KLGGALQAK	IE1	CMV	30113797	TRBV19	TRBJ2-7	5	7	HLA-A*03:01	B2M	MHCI	https://www.10xgenomics.com/resources/application-notes/a-new-way-of-exploring-immunity-linking-highly-multiplexed-antigen-recognition-to-immune-repertoire-and-phenotype/#	0	HomoSapiens	TRB
401	CASSIRSSYEQYF	NA	4	4	NA	NA	NA	NA	NA	NA	NA	NA	NA	NA	NA	NA	NA	NA	NA	NA	NA	NA	NA	NA	NA	NA	NA	NA	NA	NA	NA	NA	TRB	HomoSapiens	KLGGALQAK	IE1	CMV	30113797	TRBV19	TRBJ2-7	5	7	HLA-A*03:01	B2M	MHCI	https://www.10xgenomics.com/resources/application-notes/a-new-way-of-exploring-immunity-linking-highly-multiplexed-antigen-recognition-to-immune-repertoire-and-phenotype/#	0	HomoSapiens	TRB
402	CASSIRSSYEQYF	NA	4	4	NA	NA	NA	NA	NA	NA	NA	NA	NA	NA	NA	NA	NA	NA	NA	NA	NA	NA	NA	NA	NA	NA	NA	NA	NA	NA	NA	NA	TRB	HomoSapiens	KLGGALQAK	IE1	CMV	30113797	TRBV19	TRBJ2-7	5	7	HLA-A*03:01	B2M	MHCI	https://www.10xgenomics.com/resources/application-notes/a-new-way-of-exploring-immunity-linking-highly-multiplexed-antigen-recognition-to-immune-repertoire-and-phenotype/#	0	HomoSapiens	TRB
403	CASSIRSSYEQYF	NA	4	4	NA	NA	NA	NA	NA	NA	NA	NA	NA	NA	NA	NA	NA	NA	NA	NA	NA	NA	NA	NA	NA	NA	NA	NA	NA	NA	NA	NA	TRB	HomoSapiens	KLGGALQAK	IE1	CMV	30113797	TRBV19	TRBJ2-7	5	7	HLA-A*03:01	B2M	MHCI	https://www.10xgenomics.com/resources/application-notes/a-new-way-of-exploring-immunity-linking-highly-multiplexed-antigen-recognition-to-immune-repertoire-and-phenotype/#	0	HomoSapiens	TRB
404	CASSIRSSYEQYF	NA	4	4	NA	NA	NA	NA	NA	NA	NA	NA	NA	NA	NA	NA	NA	NA	NA	NA	NA	NA	NA	NA	NA	NA	NA	NA	NA	NA	NA	NA	TRB	HomoSapiens	KLGGALQAK	IE1	CMV	30113797	TRBV19	TRBJ2-7	5	7	HLA-A*03:01	B2M	MHCI	https://www.10xgenomics.com/resources/application-notes/a-new-way-of-exploring-immunity-linking-highly-multiplexed-antigen-recognition-to-immune-repertoire-and-phenotype/#	0	HomoSapiens	TRB
405	CASSIRSSYEQYF	NA	4	4	NA	NA	NA	NA	NA	NA	NA	NA	NA	NA	NA	NA	NA	NA	NA	NA	NA	NA	NA	NA	NA	NA	NA	NA	NA	NA	NA	NA	TRB	HomoSapiens	KLGGALQAK	IE1	CMV	30113797	TRBV19	TRBJ2-7	5	7	HLA-A*03:01	B2M	MHCI	https://www.10xgenomics.com/resources/application-notes/a-new-way-of-exploring-immunity-linking-highly-multiplexed-antigen-recognition-to-immune-repertoire-and-phenotype/#	0	HomoSapiens	TRB
406	CASSIRSSYEQYF	NA	4	4	NA	NA	NA	NA	NA	NA	NA	NA	NA	NA	NA	NA	NA	NA	NA	NA	NA	NA	NA	NA	NA	NA	NA	NA	NA	NA	NA	NA	TRB	HomoSapiens	KLGGALQAK	IE1	CMV	30113797	TRBV19	TRBJ2-7	5	7	HLA-A*03:01	B2M	MHCI	https://www.10xgenomics.com/resources/application-notes/a-new-way-of-exploring-immunity-linking-highly-multiplexed-antigen-recognition-to-immune-repertoire-and-phenotype/#	0	HomoSapiens	TRB
407	CASSIRSSYEQYF	NA	4	4	NA	NA	NA	NA	NA	NA	NA	NA	NA	NA	NA	NA	NA	NA	NA	NA	NA	NA	NA	NA	NA	NA	NA	NA	NA	NA	NA	NA	TRB	HomoSapiens	KLGGALQAK	IE1	CMV	30113797	TRBV19	TRBJ2-7	5	7	HLA-A*03:01	B2M	MHCI	https://www.10xgenomics.com/resources/application-notes/a-new-way-of-exploring-immunity-linking-highly-multiplexed-antigen-recognition-to-immune-repertoire-and-phenotype/#	0	HomoSapiens	TRB
408	CASSIRSSYEQYF	NA	4	4	NA	NA	NA	NA	NA	NA	NA	NA	NA	NA	NA	NA	NA	NA	NA	NA	NA	NA	NA	NA	NA	NA	NA	NA	NA	NA	NA	NA	TRB	HomoSapiens	RAKFKQLL	BZLF1	EBV	7.55E+23	TRBV19	TRBJ2-7	5	7	HLA-B*08:01	B2M	MHCI	https://www.10xgenomics.com/resources/application-notes/a-new-way-of-exploring-immunity-linking-highly-multiplexed-antigen-recognition-to-immune-repertoire-and-phenotype/#	0	HomoSapiens	TRB
409	CASSIRSSYEQYF	NA	4	4	NA	NA	NA	NA	NA	NA	NA	NA	NA	NA	NA	NA	NA	NA	NA	NA	NA	NA	NA	NA	NA	NA	NA	NA	NA	NA	NA	NA	TRB	HomoSapiens	RAKFKQLL	BZLF1	EBV	7.55E+23	TRBV19	TRBJ2-7	5	7	HLA-B*08:01	B2M	MHCI	https://www.10xgenomics.com/resources/application-notes/a-new-way-of-exploring-immunity-linking-highly-multiplexed-antigen-recognition-to-immune-repertoire-and-phenotype/#	0	HomoSapiens	TRB
410	CASSIRSSYEQYF	NA	4	4	NA	NA	NA	NA	NA	NA	NA	NA	NA	NA	NA	NA	NA	NA	NA	NA	NA	NA	NA	NA	NA	NA	NA	NA	NA	NA	NA	NA	TRB	HomoSapiens	RAKFKQLL	BZLF1	EBV	7.55E+23	TRBV19	TRBJ2-7	5	7	HLA-B*08:01	B2M	MHCI	https://www.10xgenomics.com/resources/application-notes/a-new-way-of-exploring-immunity-linking-highly-multiplexed-antigen-recognition-to-immune-repertoire-and-phenotype/#	0	HomoSapiens	TRB
411	CASSIRSSYEQYF	NA	4	4	NA	NA	NA	NA	NA	NA	NA	NA	NA	NA	NA	NA	NA	NA	NA	NA	NA	NA	NA	NA	NA	NA	NA	NA	NA	NA	NA	NA	TRB	HomoSapiens	RAKFKQLL	BZLF1	EBV	7.55E+23	TRBV19	TRBJ2-7	5	7	HLA-B*08:01	B2M	MHCI	https://www.10xgenomics.com/resources/application-notes/a-new-way-of-exploring-immunity-linking-highly-multiplexed-antigen-recognition-to-immune-repertoire-and-phenotype/#	0	HomoSapiens	TRB
412	CASSIRSSYEQYF	NA	4	4	NA	NA	NA	NA	NA	NA	NA	NA	NA	NA	NA	NA	NA	NA	NA	NA	NA	NA	NA	NA	NA	NA	NA	NA	NA	NA	NA	NA	TRB	HomoSapiens	RAKFKQLL	BZLF1	EBV	7.55E+23	TRBV19	TRBJ2-7	5	7	HLA-B*08:01	B2M	MHCI	https://www.10xgenomics.com/resources/application-notes/a-new-way-of-exploring-immunity-linking-highly-multiplexed-antigen-recognition-to-immune-repertoire-and-phenotype/#	0	HomoSapiens	TRB
413	CASSIRSSYEQYF	NA	4	4	NA	NA	NA	NA	NA	NA	NA	NA	NA	NA	NA	NA	NA	NA	NA	NA	NA	NA	NA	NA	NA	NA	NA	NA	NA	NA	NA	NA	TRB	HomoSapiens	RAKFKQLL	BZLF1	EBV	7.55E+23	TRBV19	TRBJ2-7	5	7	HLA-B*08:01	B2M	MHCI	https://www.10xgenomics.com/resources/application-notes/a-new-way-of-exploring-immunity-linking-highly-multiplexed-antigen-recognition-to-immune-repertoire-and-phenotype/#	0	HomoSapiens	TRB
414	CASSIRSSYEQYF	NA	4	4	NA	NA	NA	NA	NA	NA	NA	NA	NA	NA	NA	NA	NA	NA	NA	NA	NA	NA	NA	NA	NA	NA	NA	NA	NA	NA	NA	NA	TRB	HomoSapiens	RAKFKQLL	BZLF1	EBV	7.55E+23	TRBV19	TRBJ2-7	5	7	HLA-B*08:01	B2M	MHCI	https://www.10xgenomics.com/resources/application-notes/a-new-way-of-exploring-immunity-linking-highly-multiplexed-antigen-recognition-to-immune-repertoire-and-phenotype/#	0	HomoSapiens	TRB
415	CASSIRSSYEQYF	NA	4	4	NA	NA	NA	NA	NA	NA	NA	NA	NA	NA	NA	NA	NA	NA	NA	NA	NA	NA	NA	NA	NA	NA	NA	NA	NA	NA	NA	NA	TRB	HomoSapiens	RAKFKQLL	BZLF1	EBV	7.55E+23	TRBV19	TRBJ2-7	5	7	HLA-B*08:01	B2M	MHCI	https://www.10xgenomics.com/resources/application-notes/a-new-way-of-exploring-immunity-linking-highly-multiplexed-antigen-recognition-to-immune-repertoire-and-phenotype/#	0	HomoSapiens	TRB
416	CASSIRSSYEQYF	NA	4	4	NA	NA	NA	NA	NA	NA	NA	NA	NA	NA	NA	NA	NA	NA	NA	NA	NA	NA	NA	NA	NA	NA	NA	NA	NA	NA	NA	NA	TRB	HomoSapiens	RAKFKQLL	BZLF1	EBV	7.55E+23	TRBV19	TRBJ2-7	5	7	HLA-B*08:01	B2M	MHCI	https://www.10xgenomics.com/resources/application-notes/a-new-way-of-exploring-immunity-linking-highly-multiplexed-antigen-recognition-to-immune-repertoire-and-phenotype/#	0	HomoSapiens	TRB
417	CASSIRSSYEQYF	NA	4	4	NA	NA	NA	NA	NA	NA	NA	NA	NA	NA	NA	NA	NA	NA	NA	NA	NA	NA	NA	NA	NA	NA	NA	NA	NA	NA	NA	NA	TRB	HomoSapiens	RAKFKQLL	BZLF1	EBV	7.55E+23	TRBV19	TRBJ2-7	5	7	HLA-B*08:01	B2M	MHCI	https://www.10xgenomics.com/resources/application-notes/a-new-way-of-exploring-immunity-linking-highly-multiplexed-antigen-recognition-to-immune-repertoire-and-phenotype/#	0	HomoSapiens	TRB
418	CASSIRSSYEQYF	NA	4	4	NA	NA	NA	NA	NA	NA	NA	NA	NA	NA	NA	NA	NA	NA	NA	NA	NA	NA	NA	NA	NA	NA	NA	NA	NA	NA	NA	NA	TRB	HomoSapiens	RAKFKQLL	BZLF1	EBV	7.55E+23	TRBV19	TRBJ2-7	5	7	HLA-B*08:01	B2M	MHCI	https://www.10xgenomics.com/resources/application-notes/a-new-way-of-exploring-immunity-linking-highly-multiplexed-antigen-recognition-to-immune-repertoire-and-phenotype/#	0	HomoSapiens	TRB
419	CASSIRSSYEQYF	NA	4	4	NA	NA	NA	NA	NA	NA	NA	NA	NA	NA	NA	NA	NA	NA	NA	NA	NA	NA	NA	NA	NA	NA	NA	NA	NA	NA	NA	NA	TRB	HomoSapiens	RAKFKQLL	BZLF1	EBV	7.55E+23	TRBV19	TRBJ2-7	5	7	HLA-B*08:01	B2M	MHCI	https://www.10xgenomics.com/resources/application-notes/a-new-way-of-exploring-immunity-linking-highly-multiplexed-antigen-recognition-to-immune-repertoire-and-phenotype/#	0	HomoSapiens	TRB
420	CASSIRSSYEQYF	NA	4	4	NA	NA	NA	NA	NA	NA	NA	NA	NA	NA	NA	NA	NA	NA	NA	NA	NA	NA	NA	NA	NA	NA	NA	NA	NA	NA	NA	NA	TRB	HomoSapiens	RAKFKQLL	BZLF1	EBV	7.55E+23	TRBV19	TRBJ2-7	5	7	HLA-B*08:01	B2M	MHCI	https://www.10xgenomics.com/resources/application-notes/a-new-way-of-exploring-immunity-linking-highly-multiplexed-antigen-recognition-to-immune-repertoire-and-phenotype/#	0	HomoSapiens	TRB
421	CASSIRSSYEQYF	NA	4	4	NA	NA	NA	NA	NA	NA	NA	NA	NA	NA	NA	NA	NA	NA	NA	NA	NA	NA	NA	NA	NA	NA	NA	NA	NA	NA	NA	NA	TRB	HomoSapiens	RAKFKQLL	BZLF1	EBV	7.55E+23	TRBV19	TRBJ2-7	5	7	HLA-B*08:01	B2M	MHCI	https://www.10xgenomics.com/resources/application-notes/a-new-way-of-exploring-immunity-linking-highly-multiplexed-antigen-recognition-to-immune-repertoire-and-phenotype/#	0	HomoSapiens	TRB
422	CASSIRSSYEQYF	NA	4	4	NA	NA	NA	NA	NA	NA	NA	NA	NA	NA	NA	NA	NA	NA	NA	NA	NA	NA	NA	NA	NA	NA	NA	NA	NA	NA	NA	NA	TRB	HomoSapiens	RAKFKQLL	BZLF1	EBV	7.55E+23	TRBV19	TRBJ2-7	5	7	HLA-B*08:01	B2M	MHCI	https://www.10xgenomics.com/resources/application-notes/a-new-way-of-exploring-immunity-linking-highly-multiplexed-antigen-recognition-to-immune-repertoire-and-phenotype/#	0	HomoSapiens	TRB
423	CASSIRSSYEQYF	NA	4	4	NA	NA	NA	NA	NA	NA	NA	NA	NA	NA	NA	NA	NA	NA	NA	NA	NA	NA	NA	NA	NA	NA	NA	NA	NA	NA	NA	NA	TRB	HomoSapiens	RAKFKQLL	BZLF1	EBV	7.55E+23	TRBV19	TRBJ2-7	5	7	HLA-B*08:01	B2M	MHCI	https://www.10xgenomics.com/resources/application-notes/a-new-way-of-exploring-immunity-linking-highly-multiplexed-antigen-recognition-to-immune-repertoire-and-phenotype/#	0	HomoSapiens	TRB
424	CASSIRSSYEQYF	NA	4	4	NA	NA	NA	NA	NA	NA	NA	NA	NA	NA	NA	NA	NA	NA	NA	NA	NA	NA	NA	NA	NA	NA	NA	NA	NA	NA	NA	NA	TRB	HomoSapiens	RAKFKQLL	BZLF1	EBV	7.55E+23	TRBV19	TRBJ2-7	5	7	HLA-B*08:01	B2M	MHCI	https://www.10xgenomics.com/resources/application-notes/a-new-way-of-exploring-immunity-linking-highly-multiplexed-antigen-recognition-to-immune-repertoire-and-phenotype/#	0	HomoSapiens	TRB
425	CASSIRSSYEQYF	NA	4	4	NA	NA	NA	NA	NA	NA	NA	NA	NA	NA	NA	NA	NA	NA	NA	NA	NA	NA	NA	NA	NA	NA	NA	NA	NA	NA	NA	NA	TRB	HomoSapiens	RAKFKQLL	BZLF1	EBV	7.55E+23	TRBV19	TRBJ2-7	5	7	HLA-B*08:01	B2M	MHCI	https://www.10xgenomics.com/resources/application-notes/a-new-way-of-exploring-immunity-linking-highly-multiplexed-antigen-recognition-to-immune-repertoire-and-phenotype/#	0	HomoSapiens	TRB
426	CASSIRSSYEQYF	NA	4	4	NA	NA	NA	NA	NA	NA	NA	NA	NA	NA	NA	NA	NA	NA	NA	NA	NA	NA	NA	NA	NA	NA	NA	NA	NA	NA	NA	NA	TRB	HomoSapiens	RAKFKQLL	BZLF1	EBV	7.55E+23	TRBV19	TRBJ2-7	5	7	HLA-B*08:01	B2M	MHCI	https://www.10xgenomics.com/resources/application-notes/a-new-way-of-exploring-immunity-linking-highly-multiplexed-antigen-recognition-to-immune-repertoire-and-phenotype/#	0	HomoSapiens	TRB
427	CASSIRSSYEQYF	NA	4	4	NA	NA	NA	NA	NA	NA	NA	NA	NA	NA	NA	NA	NA	NA	NA	NA	NA	NA	NA	NA	NA	NA	NA	NA	NA	NA	NA	NA	TRB	HomoSapiens	RAKFKQLL	BZLF1	EBV	7.55E+23	TRBV19	TRBJ2-7	5	7	HLA-B*08:01	B2M	MHCI	https://www.10xgenomics.com/resources/application-notes/a-new-way-of-exploring-immunity-linking-highly-multiplexed-antigen-recognition-to-immune-repertoire-and-phenotype/#	0	HomoSapiens	TRB
428	CASSIRSSYEQYF	NA	4	4	NA	NA	NA	NA	NA	NA	NA	NA	NA	NA	NA	NA	NA	NA	NA	NA	NA	NA	NA	NA	NA	NA	NA	NA	NA	NA	NA	NA	TRB	HomoSapiens	RAKFKQLL	BZLF1	EBV	7.55E+23	TRBV19	TRBJ2-7	5	7	HLA-B*08:01	B2M	MHCI	https://www.10xgenomics.com/resources/application-notes/a-new-way-of-exploring-immunity-linking-highly-multiplexed-antigen-recognition-to-immune-repertoire-and-phenotype/#	0	HomoSapiens	TRB
429	CASSIRSSYEQYF	NA	4	4	NA	NA	NA	NA	NA	NA	NA	NA	NA	NA	NA	NA	NA	NA	NA	NA	NA	NA	NA	NA	NA	NA	NA	NA	NA	NA	NA	NA	TRB	HomoSapiens	RAKFKQLL	BZLF1	EBV	7.55E+23	TRBV19	TRBJ2-7	5	7	HLA-B*08:01	B2M	MHCI	https://www.10xgenomics.com/resources/application-notes/a-new-way-of-exploring-immunity-linking-highly-multiplexed-antigen-recognition-to-immune-repertoire-and-phenotype/#	0	HomoSapiens	TRB
430	CASSIRSSYEQYF	NA	4	4	NA	NA	NA	NA	NA	NA	NA	NA	NA	NA	NA	NA	NA	NA	NA	NA	NA	NA	NA	NA	NA	NA	NA	NA	NA	NA	NA	NA	TRB	HomoSapiens	RAKFKQLL	BZLF1	EBV	7.55E+23	TRBV19	TRBJ2-7	5	7	HLA-B*08:01	B2M	MHCI	https://www.10xgenomics.com/resources/application-notes/a-new-way-of-exploring-immunity-linking-highly-multiplexed-antigen-recognition-to-immune-repertoire-and-phenotype/#	0	HomoSapiens	TRB
431	CASSIRSSYEQYF	NA	4	4	NA	NA	NA	NA	NA	NA	NA	NA	NA	NA	NA	NA	NA	NA	NA	NA	NA	NA	NA	NA	NA	NA	NA	NA	NA	NA	NA	NA	TRB	HomoSapiens	RAKFKQLL	BZLF1	EBV	7.55E+23	TRBV19	TRBJ2-7	5	7	HLA-B*08:01	B2M	MHCI	https://www.10xgenomics.com/resources/application-notes/a-new-way-of-exploring-immunity-linking-highly-multiplexed-antigen-recognition-to-immune-repertoire-and-phenotype/#	0	HomoSapiens	TRB
432	CASSIRSSYEQYF	NA	4	4	NA	NA	NA	NA	NA	NA	NA	NA	NA	NA	NA	NA	NA	NA	NA	NA	NA	NA	NA	NA	NA	NA	NA	NA	NA	NA	NA	NA	TRB	HomoSapiens	RAKFKQLL	BZLF1	EBV	7.55E+23	TRBV19	TRBJ2-7	5	7	HLA-B*08:01	B2M	MHCI	https://www.10xgenomics.com/resources/application-notes/a-new-way-of-exploring-immunity-linking-highly-multiplexed-antigen-recognition-to-immune-repertoire-and-phenotype/#	0	HomoSapiens	TRB
433	CASSIRSSYEQYF	NA	4	4	NA	NA	NA	NA	NA	NA	NA	NA	NA	NA	NA	NA	NA	NA	NA	NA	NA	NA	NA	NA	NA	NA	NA	NA	NA	NA	NA	NA	TRB	HomoSapiens	RAKFKQLL	BZLF1	EBV	7.55E+23	TRBV19	TRBJ2-7	5	7	HLA-B*08:01	B2M	MHCI	https://www.10xgenomics.com/resources/application-notes/a-new-way-of-exploring-immunity-linking-highly-multiplexed-antigen-recognition-to-immune-repertoire-and-phenotype/#	0	HomoSapiens	TRB
434	CASSIRSSYEQYF	NA	4	4	NA	NA	NA	NA	NA	NA	NA	NA	NA	NA	NA	NA	NA	NA	NA	NA	NA	NA	NA	NA	NA	NA	NA	NA	NA	NA	NA	NA	TRB	HomoSapiens	RAKFKQLL	BZLF1	EBV	7.55E+23	TRBV19	TRBJ2-7	5	7	HLA-B*08:01	B2M	MHCI	https://www.10xgenomics.com/resources/application-notes/a-new-way-of-exploring-immunity-linking-highly-multiplexed-antigen-recognition-to-immune-repertoire-and-phenotype/#	0	HomoSapiens	TRB
435	CASSIRSSYEQYF	NA	4	4	NA	NA	NA	NA	NA	NA	NA	NA	NA	NA	NA	NA	NA	NA	NA	NA	NA	NA	NA	NA	NA	NA	NA	NA	NA	NA	NA	NA	TRB	HomoSapiens	RAKFKQLL	BZLF1	EBV	7.55E+23	TRBV19	TRBJ2-7	5	7	HLA-B*08:01	B2M	MHCI	https://www.10xgenomics.com/resources/application-notes/a-new-way-of-exploring-immunity-linking-highly-multiplexed-antigen-recognition-to-immune-repertoire-and-phenotype/#	0	HomoSapiens	TRB
436	CASSIRSSYEQYF	NA	4	4	NA	NA	NA	NA	NA	NA	NA	NA	NA	NA	NA	NA	NA	NA	NA	NA	NA	NA	NA	NA	NA	NA	NA	NA	NA	NA	NA	NA	TRB	HomoSapiens	RAKFKQLL	BZLF1	EBV	7.55E+23	TRBV19	TRBJ2-7	5	7	HLA-B*08:01	B2M	MHCI	https://www.10xgenomics.com/resources/application-notes/a-new-way-of-exploring-immunity-linking-highly-multiplexed-antigen-recognition-to-immune-repertoire-and-phenotype/#	0	HomoSapiens	TRB
437	CASSIRSSYEQYF	NA	4	4	NA	NA	NA	NA	NA	NA	NA	NA	NA	NA	NA	NA	NA	NA	NA	NA	NA	NA	NA	NA	NA	NA	NA	NA	NA	NA	NA	NA	TRB	HomoSapiens	RAKFKQLL	BZLF1	EBV	7.55E+23	TRBV19	TRBJ2-7	5	7	HLA-B*08:01	B2M	MHCI	https://www.10xgenomics.com/resources/application-notes/a-new-way-of-exploring-immunity-linking-highly-multiplexed-antigen-recognition-to-immune-repertoire-and-phenotype/#	0	HomoSapiens	TRB
438	CASSIRSSYEQYF	NA	4	4	NA	NA	NA	NA	NA	NA	NA	NA	NA	NA	NA	NA	NA	NA	NA	NA	NA	NA	NA	NA	NA	NA	NA	NA	NA	NA	NA	NA	TRB	HomoSapiens	RAKFKQLL	BZLF1	EBV	7.55E+23	TRBV19	TRBJ2-7	5	7	HLA-B*08:01	B2M	MHCI	https://www.10xgenomics.com/resources/application-notes/a-new-way-of-exploring-immunity-linking-highly-multiplexed-antigen-recognition-to-immune-repertoire-and-phenotype/#	0	HomoSapiens	TRB
439	CASSIRSSYEQYF	NA	4	4	NA	NA	NA	NA	NA	NA	NA	NA	NA	NA	NA	NA	NA	NA	NA	NA	NA	NA	NA	NA	NA	NA	NA	NA	NA	NA	NA	NA	TRB	HomoSapiens	RAKFKQLL	BZLF1	EBV	7.55E+23	TRBV19	TRBJ2-7	5	7	HLA-B*08:01	B2M	MHCI	https://www.10xgenomics.com/resources/application-notes/a-new-way-of-exploring-immunity-linking-highly-multiplexed-antigen-recognition-to-immune-repertoire-and-phenotype/#	0	HomoSapiens	TRB
440	CASSIRSSYEQYF	NA	4	4	NA	NA	NA	NA	NA	NA	NA	NA	NA	NA	NA	NA	NA	NA	NA	NA	NA	NA	NA	NA	NA	NA	NA	NA	NA	NA	NA	NA	TRB	HomoSapiens	RAKFKQLL	BZLF1	EBV	7.55E+23	TRBV19	TRBJ2-7	5	7	HLA-B*08:01	B2M	MHCI	https://www.10xgenomics.com/resources/application-notes/a-new-way-of-exploring-immunity-linking-highly-multiplexed-antigen-recognition-to-immune-repertoire-and-phenotype/#	0	HomoSapiens	TRB
441	CASSIRSSYEQYF	NA	4	4	NA	NA	NA	NA	NA	NA	NA	NA	NA	NA	NA	NA	NA	NA	NA	NA	NA	NA	NA	NA	NA	NA	NA	NA	NA	NA	NA	NA	TRB	HomoSapiens	RAKFKQLL	BZLF1	EBV	7.55E+23	TRBV19	TRBJ2-7	5	7	HLA-B*08:01	B2M	MHCI	https://www.10xgenomics.com/resources/application-notes/a-new-way-of-exploring-immunity-linking-highly-multiplexed-antigen-recognition-to-immune-repertoire-and-phenotype/#	0	HomoSapiens	TRB
442	CASSIRSSYEQYF	NA	4	4	NA	NA	NA	NA	NA	NA	NA	NA	NA	NA	NA	NA	NA	NA	NA	NA	NA	NA	NA	NA	NA	NA	NA	NA	NA	NA	NA	NA	TRB	HomoSapiens	RAKFKQLL	BZLF1	EBV	7.55E+23	TRBV19	TRBJ2-7	5	7	HLA-B*08:01	B2M	MHCI	https://www.10xgenomics.com/resources/application-notes/a-new-way-of-exploring-immunity-linking-highly-multiplexed-antigen-recognition-to-immune-repertoire-and-phenotype/#	0	HomoSapiens	TRB
443	CASSIRSSYEQYF	NA	4	4	NA	NA	NA	NA	NA	NA	NA	NA	NA	NA	NA	NA	NA	NA	NA	NA	NA	NA	NA	NA	NA	NA	NA	NA	NA	NA	NA	NA	TRB	HomoSapiens	RAKFKQLL	BZLF1	EBV	7.55E+23	TRBV19	TRBJ2-7	5	7	HLA-B*08:01	B2M	MHCI	https://www.10xgenomics.com/resources/application-notes/a-new-way-of-exploring-immunity-linking-highly-multiplexed-antigen-recognition-to-immune-repertoire-and-phenotype/#	0	HomoSapiens	TRB
444	CASSIRSSYEQYF	NA	4	4	NA	NA	NA	NA	NA	NA	NA	NA	NA	NA	NA	NA	NA	NA	NA	NA	NA	NA	NA	NA	NA	NA	NA	NA	NA	NA	NA	NA	TRB	HomoSapiens	RAKFKQLL	BZLF1	EBV	7.55E+23	TRBV19	TRBJ2-7	5	7	HLA-B*08:01	B2M	MHCI	https://www.10xgenomics.com/resources/application-notes/a-new-way-of-exploring-immunity-linking-highly-multiplexed-antigen-recognition-to-immune-repertoire-and-phenotype/#	0	HomoSapiens	TRB
445	CASSIRSSYEQYF	NA	4	4	NA	NA	NA	NA	NA	NA	NA	NA	NA	NA	NA	NA	NA	NA	NA	NA	NA	NA	NA	NA	NA	NA	NA	NA	NA	NA	NA	NA	TRB	HomoSapiens	RAKFKQLL	BZLF1	EBV	7.55E+23	TRBV19	TRBJ2-7	5	7	HLA-B*08:01	B2M	MHCI	https://www.10xgenomics.com/resources/application-notes/a-new-way-of-exploring-immunity-linking-highly-multiplexed-antigen-recognition-to-immune-repertoire-and-phenotype/#	0	HomoSapiens	TRB
446	CASSIRSSYEQYF	NA	4	4	NA	NA	NA	NA	NA	NA	NA	NA	NA	NA	NA	NA	NA	NA	NA	NA	NA	NA	NA	NA	NA	NA	NA	NA	NA	NA	NA	NA	TRB	HomoSapiens	GILGFVFTL	M	InfluenzaA	Inf	TRBV17S1,TRBV19,TRBV19-1,TRBV19*01,TRBV19-1*01,TRBV19*03,TRBV19*02	TRBJ2-7*01,TRBJ1-1*01,TRBJ1-2*01,TRBJ2-1*01,TRBJ2-7	5	7	HLA-A*02:01,HLA-A*02	B2M	MHCI	PMID:27645996,PMID:25609818,PMID:28423320,PMID:28250417,PMID:29483513,PMID:28636589,PMID:21562156,https://www.10xgenomics.com/resources/application-notes/a-new-way-of-exploring-immunity-linking-highly-multiplexed-antigen-recognition-to-immune-repertoire-and-phenotype/#,PMID:29997621,PMID:28636592,PMID:7807026	3	HomoSapiens	TRB
447	CASSIRSSYEQYF	NA	4	4	NA	NA	NA	NA	NA	NA	NA	NA	NA	NA	NA	NA	NA	NA	NA	NA	NA	NA	NA	NA	NA	NA	NA	NA	NA	NA	NA	NA	TRB	HomoSapiens	GILGFVFTL	M	InfluenzaA	Inf	TRBV17S1,TRBV19,TRBV19-1,TRBV19*01,TRBV19-1*01,TRBV19*03,TRBV19*02	TRBJ2-7*01,TRBJ1-1*01,TRBJ1-2*01,TRBJ2-1*01,TRBJ2-7	5	7	HLA-A*02:01,HLA-A*02	B2M	MHCI	PMID:27645996,PMID:25609818,PMID:28423320,PMID:28250417,PMID:29483513,PMID:28636589,PMID:21562156,https://www.10xgenomics.com/resources/application-notes/a-new-way-of-exploring-immunity-linking-highly-multiplexed-antigen-recognition-to-immune-repertoire-and-phenotype/#,PMID:29997621,PMID:28636592,PMID:7807026	3	HomoSapiens	TRB
448	CASSIRSSYEQYF	NA	4	4	NA	NA	NA	NA	NA	NA	NA	NA	NA	NA	NA	NA	NA	NA	NA	NA	NA	NA	NA	NA	NA	NA	NA	NA	NA	NA	NA	NA	TRB	HomoSapiens	GILGFVFTL	M	InfluenzaA	Inf	TRBV17S1,TRBV19,TRBV19-1,TRBV19*01,TRBV19-1*01,TRBV19*03,TRBV19*02	TRBJ2-7*01,TRBJ1-1*01,TRBJ1-2*01,TRBJ2-1*01,TRBJ2-7	5	7	HLA-A*02:01,HLA-A*02	B2M	MHCI	PMID:27645996,PMID:25609818,PMID:28423320,PMID:28250417,PMID:29483513,PMID:28636589,PMID:21562156,https://www.10xgenomics.com/resources/application-notes/a-new-way-of-exploring-immunity-linking-highly-multiplexed-antigen-recognition-to-immune-repertoire-and-phenotype/#,PMID:29997621,PMID:28636592,PMID:7807026	3	HomoSapiens	TRB
449	CASSIRSSYEQYF	NA	4	4	NA	NA	NA	NA	NA	NA	NA	NA	NA	NA	NA	NA	NA	NA	NA	NA	NA	NA	NA	NA	NA	NA	NA	NA	NA	NA	NA	NA	TRB	HomoSapiens	GILGFVFTL	M	InfluenzaA	Inf	TRBV17S1,TRBV19,TRBV19-1,TRBV19*01,TRBV19-1*01,TRBV19*03,TRBV19*02	TRBJ2-7*01,TRBJ1-1*01,TRBJ1-2*01,TRBJ2-1*01,TRBJ2-7	5	7	HLA-A*02:01,HLA-A*02	B2M	MHCI	PMID:27645996,PMID:25609818,PMID:28423320,PMID:28250417,PMID:29483513,PMID:28636589,PMID:21562156,https://www.10xgenomics.com/resources/application-notes/a-new-way-of-exploring-immunity-linking-highly-multiplexed-antigen-recognition-to-immune-repertoire-and-phenotype/#,PMID:29997621,PMID:28636592,PMID:7807026	3	HomoSapiens	TRB
450	CASSIRSSYEQYF	NA	4	4	NA	NA	NA	NA	NA	NA	NA	NA	NA	NA	NA	NA	NA	NA	NA	NA	NA	NA	NA	NA	NA	NA	NA	NA	NA	NA	NA	NA	TRB	HomoSapiens	GILGFVFTL	M	InfluenzaA	Inf	TRBV17S1,TRBV19,TRBV19-1,TRBV19*01,TRBV19-1*01,TRBV19*03,TRBV19*02	TRBJ2-7*01,TRBJ1-1*01,TRBJ1-2*01,TRBJ2-1*01,TRBJ2-7	5	7	HLA-A*02:01,HLA-A*02	B2M	MHCI	PMID:27645996,PMID:25609818,PMID:28423320,PMID:28250417,PMID:29483513,PMID:28636589,PMID:21562156,https://www.10xgenomics.com/resources/application-notes/a-new-way-of-exploring-immunity-linking-highly-multiplexed-antigen-recognition-to-immune-repertoire-and-phenotype/#,PMID:29997621,PMID:28636592,PMID:7807026	3	HomoSapiens	TRB
451	CASSIRSSYEQYF	NA	4	4	NA	NA	NA	NA	NA	NA	NA	NA	NA	NA	NA	NA	NA	NA	NA	NA	NA	NA	NA	NA	NA	NA	NA	NA	NA	NA	NA	NA	TRB	HomoSapiens	GILGFVFTL	M	InfluenzaA	Inf	TRBV17S1,TRBV19,TRBV19-1,TRBV19*01,TRBV19-1*01,TRBV19*03,TRBV19*02	TRBJ2-7*01,TRBJ1-1*01,TRBJ1-2*01,TRBJ2-1*01,TRBJ2-7	5	7	HLA-A*02:01,HLA-A*02	B2M	MHCI	PMID:27645996,PMID:25609818,PMID:28423320,PMID:28250417,PMID:29483513,PMID:28636589,PMID:21562156,https://www.10xgenomics.com/resources/application-notes/a-new-way-of-exploring-immunity-linking-highly-multiplexed-antigen-recognition-to-immune-repertoire-and-phenotype/#,PMID:29997621,PMID:28636592,PMID:7807026	3	HomoSapiens	TRB
452	CASSIRSSYEQYF	NA	4	4	NA	NA	NA	NA	NA	NA	NA	NA	NA	NA	NA	NA	NA	NA	NA	NA	NA	NA	NA	NA	NA	NA	NA	NA	NA	NA	NA	NA	TRB	HomoSapiens	GILGFVFTL	M	InfluenzaA	Inf	TRBV17S1,TRBV19,TRBV19-1,TRBV19*01,TRBV19-1*01,TRBV19*03,TRBV19*02	TRBJ2-7*01,TRBJ1-1*01,TRBJ1-2*01,TRBJ2-1*01,TRBJ2-7	5	7	HLA-A*02:01,HLA-A*02	B2M	MHCI	PMID:27645996,PMID:25609818,PMID:28423320,PMID:28250417,PMID:29483513,PMID:28636589,PMID:21562156,https://www.10xgenomics.com/resources/application-notes/a-new-way-of-exploring-immunity-linking-highly-multiplexed-antigen-recognition-to-immune-repertoire-and-phenotype/#,PMID:29997621,PMID:28636592,PMID:7807026	3	HomoSapiens	TRB
453	CASSIRSSYEQYF	NA	4	4	NA	NA	NA	NA	NA	NA	NA	NA	NA	NA	NA	NA	NA	NA	NA	NA	NA	NA	NA	NA	NA	NA	NA	NA	NA	NA	NA	NA	TRB	HomoSapiens	GILGFVFTL	M	InfluenzaA	Inf	TRBV17S1,TRBV19,TRBV19-1,TRBV19*01,TRBV19-1*01,TRBV19*03,TRBV19*02	TRBJ2-7*01,TRBJ1-1*01,TRBJ1-2*01,TRBJ2-1*01,TRBJ2-7	5	7	HLA-A*02:01,HLA-A*02	B2M	MHCI	PMID:27645996,PMID:25609818,PMID:28423320,PMID:28250417,PMID:29483513,PMID:28636589,PMID:21562156,https://www.10xgenomics.com/resources/application-notes/a-new-way-of-exploring-immunity-linking-highly-multiplexed-antigen-recognition-to-immune-repertoire-and-phenotype/#,PMID:29997621,PMID:28636592,PMID:7807026	3	HomoSapiens	TRB
454	CASSIRSSYEQYF	NA	4	4	NA	NA	NA	NA	NA	NA	NA	NA	NA	NA	NA	NA	NA	NA	NA	NA	NA	NA	NA	NA	NA	NA	NA	NA	NA	NA	NA	NA	TRB	HomoSapiens	GILGFVFTL	M	InfluenzaA	Inf	TRBV17S1,TRBV19,TRBV19-1,TRBV19*01,TRBV19-1*01,TRBV19*03,TRBV19*02	TRBJ2-7*01,TRBJ1-1*01,TRBJ1-2*01,TRBJ2-1*01,TRBJ2-7	5	7	HLA-A*02:01,HLA-A*02	B2M	MHCI	PMID:27645996,PMID:25609818,PMID:28423320,PMID:28250417,PMID:29483513,PMID:28636589,PMID:21562156,https://www.10xgenomics.com/resources/application-notes/a-new-way-of-exploring-immunity-linking-highly-multiplexed-antigen-recognition-to-immune-repertoire-and-phenotype/#,PMID:29997621,PMID:28636592,PMID:7807026	3	HomoSapiens	TRB
455	CASSIRSSYEQYF	NA	4	4	NA	NA	NA	NA	NA	NA	NA	NA	NA	NA	NA	NA	NA	NA	NA	NA	NA	NA	NA	NA	NA	NA	NA	NA	NA	NA	NA	NA	TRB	HomoSapiens	GILGFVFTL	M	InfluenzaA	Inf	TRBV17S1,TRBV19,TRBV19-1,TRBV19*01,TRBV19-1*01,TRBV19*03,TRBV19*02	TRBJ2-7*01,TRBJ1-1*01,TRBJ1-2*01,TRBJ2-1*01,TRBJ2-7	5	7	HLA-A*02:01,HLA-A*02	B2M	MHCI	PMID:27645996,PMID:25609818,PMID:28423320,PMID:28250417,PMID:29483513,PMID:28636589,PMID:21562156,https://www.10xgenomics.com/resources/application-notes/a-new-way-of-exploring-immunity-linking-highly-multiplexed-antigen-recognition-to-immune-repertoire-and-phenotype/#,PMID:29997621,PMID:28636592,PMID:7807026	3	HomoSapiens	TRB
456	CASSIRSSYEQYF	NA	4	4	NA	NA	NA	NA	NA	NA	NA	NA	NA	NA	NA	NA	NA	NA	NA	NA	NA	NA	NA	NA	NA	NA	NA	NA	NA	NA	NA	NA	TRB	HomoSapiens	GILGFVFTL	M	InfluenzaA	Inf	TRBV17S1,TRBV19,TRBV19-1,TRBV19*01,TRBV19-1*01,TRBV19*03,TRBV19*02	TRBJ2-7*01,TRBJ1-1*01,TRBJ1-2*01,TRBJ2-1*01,TRBJ2-7	5	7	HLA-A*02:01,HLA-A*02	B2M	MHCI	PMID:27645996,PMID:25609818,PMID:28423320,PMID:28250417,PMID:29483513,PMID:28636589,PMID:21562156,https://www.10xgenomics.com/resources/application-notes/a-new-way-of-exploring-immunity-linking-highly-multiplexed-antigen-recognition-to-immune-repertoire-and-phenotype/#,PMID:29997621,PMID:28636592,PMID:7807026	3	HomoSapiens	TRB
457	CASSIRSSYEQYF	NA	4	4	NA	NA	NA	NA	NA	NA	NA	NA	NA	NA	NA	NA	NA	NA	NA	NA	NA	NA	NA	NA	NA	NA	NA	NA	NA	NA	NA	NA	TRB	HomoSapiens	GILGFVFTL	M	InfluenzaA	Inf	TRBV17S1,TRBV19,TRBV19-1,TRBV19*01,TRBV19-1*01,TRBV19*03,TRBV19*02	TRBJ2-7*01,TRBJ1-1*01,TRBJ1-2*01,TRBJ2-1*01,TRBJ2-7	5	7	HLA-A*02:01,HLA-A*02	B2M	MHCI	PMID:27645996,PMID:25609818,PMID:28423320,PMID:28250417,PMID:29483513,PMID:28636589,PMID:21562156,https://www.10xgenomics.com/resources/application-notes/a-new-way-of-exploring-immunity-linking-highly-multiplexed-antigen-recognition-to-immune-repertoire-and-phenotype/#,PMID:29997621,PMID:28636592,PMID:7807026	3	HomoSapiens	TRB
458	CASSIRSSYEQYF	NA	4	4	NA	NA	NA	NA	NA	NA	NA	NA	NA	NA	NA	NA	NA	NA	NA	NA	NA	NA	NA	NA	NA	NA	NA	NA	NA	NA	NA	NA	TRB	HomoSapiens	GILGFVFTL	M	InfluenzaA	Inf	TRBV17S1,TRBV19,TRBV19-1,TRBV19*01,TRBV19-1*01,TRBV19*03,TRBV19*02	TRBJ2-7*01,TRBJ1-1*01,TRBJ1-2*01,TRBJ2-1*01,TRBJ2-7	5	7	HLA-A*02:01,HLA-A*02	B2M	MHCI	PMID:27645996,PMID:25609818,PMID:28423320,PMID:28250417,PMID:29483513,PMID:28636589,PMID:21562156,https://www.10xgenomics.com/resources/application-notes/a-new-way-of-exploring-immunity-linking-highly-multiplexed-antigen-recognition-to-immune-repertoire-and-phenotype/#,PMID:29997621,PMID:28636592,PMID:7807026	3	HomoSapiens	TRB
459	CASSIRSSYEQYF	NA	4	4	NA	NA	NA	NA	NA	NA	NA	NA	NA	NA	NA	NA	NA	NA	NA	NA	NA	NA	NA	NA	NA	NA	NA	NA	NA	NA	NA	NA	TRB	HomoSapiens	GILGFVFTL	M	InfluenzaA	Inf	TRBV17S1,TRBV19,TRBV19-1,TRBV19*01,TRBV19-1*01,TRBV19*03,TRBV19*02	TRBJ2-7*01,TRBJ1-1*01,TRBJ1-2*01,TRBJ2-1*01,TRBJ2-7	5	7	HLA-A*02:01,HLA-A*02	B2M	MHCI	PMID:27645996,PMID:25609818,PMID:28423320,PMID:28250417,PMID:29483513,PMID:28636589,PMID:21562156,https://www.10xgenomics.com/resources/application-notes/a-new-way-of-exploring-immunity-linking-highly-multiplexed-antigen-recognition-to-immune-repertoire-and-phenotype/#,PMID:29997621,PMID:28636592,PMID:7807026	3	HomoSapiens	TRB
460	CASSIRSSYEQYF	NA	4	4	NA	NA	NA	NA	NA	NA	NA	NA	NA	NA	NA	NA	NA	NA	NA	NA	NA	NA	NA	NA	NA	NA	NA	NA	NA	NA	NA	NA	TRB	HomoSapiens	GILGFVFTL	M	InfluenzaA	Inf	TRBV17S1,TRBV19,TRBV19-1,TRBV19*01,TRBV19-1*01,TRBV19*03,TRBV19*02	TRBJ2-7*01,TRBJ1-1*01,TRBJ1-2*01,TRBJ2-1*01,TRBJ2-7	5	7	HLA-A*02:01,HLA-A*02	B2M	MHCI	PMID:27645996,PMID:25609818,PMID:28423320,PMID:28250417,PMID:29483513,PMID:28636589,PMID:21562156,https://www.10xgenomics.com/resources/application-notes/a-new-way-of-exploring-immunity-linking-highly-multiplexed-antigen-recognition-to-immune-repertoire-and-phenotype/#,PMID:29997621,PMID:28636592,PMID:7807026	3	HomoSapiens	TRB
461	CASSIRSSYEQYF	NA	4	4	NA	NA	NA	NA	NA	NA	NA	NA	NA	NA	NA	NA	NA	NA	NA	NA	NA	NA	NA	NA	NA	NA	NA	NA	NA	NA	NA	NA	TRB	HomoSapiens	GILGFVFTL	M	InfluenzaA	Inf	TRBV17S1,TRBV19,TRBV19-1,TRBV19*01,TRBV19-1*01,TRBV19*03,TRBV19*02	TRBJ2-7*01,TRBJ1-1*01,TRBJ1-2*01,TRBJ2-1*01,TRBJ2-7	5	7	HLA-A*02:01,HLA-A*02	B2M	MHCI	PMID:27645996,PMID:25609818,PMID:28423320,PMID:28250417,PMID:29483513,PMID:28636589,PMID:21562156,https://www.10xgenomics.com/resources/application-notes/a-new-way-of-exploring-immunity-linking-highly-multiplexed-antigen-recognition-to-immune-repertoire-and-phenotype/#,PMID:29997621,PMID:28636592,PMID:7807026	3	HomoSapiens	TRB
462	CASSIRSSYEQYF	NA	4	4	NA	NA	NA	NA	NA	NA	NA	NA	NA	NA	NA	NA	NA	NA	NA	NA	NA	NA	NA	NA	NA	NA	NA	NA	NA	NA	NA	NA	TRB	HomoSapiens	GILGFVFTL	M	InfluenzaA	Inf	TRBV17S1,TRBV19,TRBV19-1,TRBV19*01,TRBV19-1*01,TRBV19*03,TRBV19*02	TRBJ2-7*01,TRBJ1-1*01,TRBJ1-2*01,TRBJ2-1*01,TRBJ2-7	5	7	HLA-A*02:01,HLA-A*02	B2M	MHCI	PMID:27645996,PMID:25609818,PMID:28423320,PMID:28250417,PMID:29483513,PMID:28636589,PMID:21562156,https://www.10xgenomics.com/resources/application-notes/a-new-way-of-exploring-immunity-linking-highly-multiplexed-antigen-recognition-to-immune-repertoire-and-phenotype/#,PMID:29997621,PMID:28636592,PMID:7807026	3	HomoSapiens	TRB
463	CASSIRSSYEQYF	NA	4	4	NA	NA	NA	NA	NA	NA	NA	NA	NA	NA	NA	NA	NA	NA	NA	NA	NA	NA	NA	NA	NA	NA	NA	NA	NA	NA	NA	NA	TRB	HomoSapiens	GILGFVFTL	M	InfluenzaA	Inf	TRBV17S1,TRBV19,TRBV19-1,TRBV19*01,TRBV19-1*01,TRBV19*03,TRBV19*02	TRBJ2-7*01,TRBJ1-1*01,TRBJ1-2*01,TRBJ2-1*01,TRBJ2-7	5	7	HLA-A*02:01,HLA-A*02	B2M	MHCI	PMID:27645996,PMID:25609818,PMID:28423320,PMID:28250417,PMID:29483513,PMID:28636589,PMID:21562156,https://www.10xgenomics.com/resources/application-notes/a-new-way-of-exploring-immunity-linking-highly-multiplexed-antigen-recognition-to-immune-repertoire-and-phenotype/#,PMID:29997621,PMID:28636592,PMID:7807026	3	HomoSapiens	TRB
464	CASSIRSSYEQYF	NA	4	4	NA	NA	NA	NA	NA	NA	NA	NA	NA	NA	NA	NA	NA	NA	NA	NA	NA	NA	NA	NA	NA	NA	NA	NA	NA	NA	NA	NA	TRB	HomoSapiens	GILGFVFTL	M	InfluenzaA	Inf	TRBV17S1,TRBV19,TRBV19-1,TRBV19*01,TRBV19-1*01,TRBV19*03,TRBV19*02	TRBJ2-7*01,TRBJ1-1*01,TRBJ1-2*01,TRBJ2-1*01,TRBJ2-7	5	7	HLA-A*02:01,HLA-A*02	B2M	MHCI	PMID:27645996,PMID:25609818,PMID:28423320,PMID:28250417,PMID:29483513,PMID:28636589,PMID:21562156,https://www.10xgenomics.com/resources/application-notes/a-new-way-of-exploring-immunity-linking-highly-multiplexed-antigen-recognition-to-immune-repertoire-and-phenotype/#,PMID:29997621,PMID:28636592,PMID:7807026	3	HomoSapiens	TRB
465	CASSIRSSYEQYF	NA	4	4	NA	NA	NA	NA	NA	NA	NA	NA	NA	NA	NA	NA	NA	NA	NA	NA	NA	NA	NA	NA	NA	NA	NA	NA	NA	NA	NA	NA	TRB	HomoSapiens	GILGFVFTL	M	InfluenzaA	Inf	TRBV17S1,TRBV19,TRBV19-1,TRBV19*01,TRBV19-1*01,TRBV19*03,TRBV19*02	TRBJ2-7*01,TRBJ1-1*01,TRBJ1-2*01,TRBJ2-1*01,TRBJ2-7	5	7	HLA-A*02:01,HLA-A*02	B2M	MHCI	PMID:27645996,PMID:25609818,PMID:28423320,PMID:28250417,PMID:29483513,PMID:28636589,PMID:21562156,https://www.10xgenomics.com/resources/application-notes/a-new-way-of-exploring-immunity-linking-highly-multiplexed-antigen-recognition-to-immune-repertoire-and-phenotype/#,PMID:29997621,PMID:28636592,PMID:7807026	3	HomoSapiens	TRB
466	CASSIRSSYEQYF	NA	4	4	NA	NA	NA	NA	NA	NA	NA	NA	NA	NA	NA	NA	NA	NA	NA	NA	NA	NA	NA	NA	NA	NA	NA	NA	NA	NA	NA	NA	TRB	HomoSapiens	GILGFVFTL	M	InfluenzaA	Inf	TRBV17S1,TRBV19,TRBV19-1,TRBV19*01,TRBV19-1*01,TRBV19*03,TRBV19*02	TRBJ2-7*01,TRBJ1-1*01,TRBJ1-2*01,TRBJ2-1*01,TRBJ2-7	5	7	HLA-A*02:01,HLA-A*02	B2M	MHCI	PMID:27645996,PMID:25609818,PMID:28423320,PMID:28250417,PMID:29483513,PMID:28636589,PMID:21562156,https://www.10xgenomics.com/resources/application-notes/a-new-way-of-exploring-immunity-linking-highly-multiplexed-antigen-recognition-to-immune-repertoire-and-phenotype/#,PMID:29997621,PMID:28636592,PMID:7807026	3	HomoSapiens	TRB
467	CASSIRSSYEQYF	NA	4	4	NA	NA	NA	NA	NA	NA	NA	NA	NA	NA	NA	NA	NA	NA	NA	NA	NA	NA	NA	NA	NA	NA	NA	NA	NA	NA	NA	NA	TRB	HomoSapiens	GILGFVFTL	M	InfluenzaA	Inf	TRBV17S1,TRBV19,TRBV19-1,TRBV19*01,TRBV19-1*01,TRBV19*03,TRBV19*02	TRBJ2-7*01,TRBJ1-1*01,TRBJ1-2*01,TRBJ2-1*01,TRBJ2-7	5	7	HLA-A*02:01,HLA-A*02	B2M	MHCI	PMID:27645996,PMID:25609818,PMID:28423320,PMID:28250417,PMID:29483513,PMID:28636589,PMID:21562156,https://www.10xgenomics.com/resources/application-notes/a-new-way-of-exploring-immunity-linking-highly-multiplexed-antigen-recognition-to-immune-repertoire-and-phenotype/#,PMID:29997621,PMID:28636592,PMID:7807026	3	HomoSapiens	TRB
468	CASSIRSSYEQYF	NA	4	4	NA	NA	NA	NA	NA	NA	NA	NA	NA	NA	NA	NA	NA	NA	NA	NA	NA	NA	NA	NA	NA	NA	NA	NA	NA	NA	NA	NA	TRB	HomoSapiens	GILGFVFTL	M	InfluenzaA	Inf	TRBV17S1,TRBV19,TRBV19-1,TRBV19*01,TRBV19-1*01,TRBV19*03,TRBV19*02	TRBJ2-7*01,TRBJ1-1*01,TRBJ1-2*01,TRBJ2-1*01,TRBJ2-7	5	7	HLA-A*02:01,HLA-A*02	B2M	MHCI	PMID:27645996,PMID:25609818,PMID:28423320,PMID:28250417,PMID:29483513,PMID:28636589,PMID:21562156,https://www.10xgenomics.com/resources/application-notes/a-new-way-of-exploring-immunity-linking-highly-multiplexed-antigen-recognition-to-immune-repertoire-and-phenotype/#,PMID:29997621,PMID:28636592,PMID:7807026	3	HomoSapiens	TRB
469	CASSIRSSYEQYF	NA	4	4	NA	NA	NA	NA	NA	NA	NA	NA	NA	NA	NA	NA	NA	NA	NA	NA	NA	NA	NA	NA	NA	NA	NA	NA	NA	NA	NA	NA	TRB	HomoSapiens	GILGFVFTL	M	InfluenzaA	Inf	TRBV17S1,TRBV19,TRBV19-1,TRBV19*01,TRBV19-1*01,TRBV19*03,TRBV19*02	TRBJ2-7*01,TRBJ1-1*01,TRBJ1-2*01,TRBJ2-1*01,TRBJ2-7	5	7	HLA-A*02:01,HLA-A*02	B2M	MHCI	PMID:27645996,PMID:25609818,PMID:28423320,PMID:28250417,PMID:29483513,PMID:28636589,PMID:21562156,https://www.10xgenomics.com/resources/application-notes/a-new-way-of-exploring-immunity-linking-highly-multiplexed-antigen-recognition-to-immune-repertoire-and-phenotype/#,PMID:29997621,PMID:28636592,PMID:7807026	3	HomoSapiens	TRB
470	CASSIRSSYEQYF	NA	4	4	NA	NA	NA	NA	NA	NA	NA	NA	NA	NA	NA	NA	NA	NA	NA	NA	NA	NA	NA	NA	NA	NA	NA	NA	NA	NA	NA	NA	TRB	HomoSapiens	GILGFVFTL	M	InfluenzaA	Inf	TRBV17S1,TRBV19,TRBV19-1,TRBV19*01,TRBV19-1*01,TRBV19*03,TRBV19*02	TRBJ2-7*01,TRBJ1-1*01,TRBJ1-2*01,TRBJ2-1*01,TRBJ2-7	5	7	HLA-A*02:01,HLA-A*02	B2M	MHCI	PMID:27645996,PMID:25609818,PMID:28423320,PMID:28250417,PMID:29483513,PMID:28636589,PMID:21562156,https://www.10xgenomics.com/resources/application-notes/a-new-way-of-exploring-immunity-linking-highly-multiplexed-antigen-recognition-to-immune-repertoire-and-phenotype/#,PMID:29997621,PMID:28636592,PMID:7807026	3	HomoSapiens	TRB
471	CASSIRSSYEQYF	NA	4	4	NA	NA	NA	NA	NA	NA	NA	NA	NA	NA	NA	NA	NA	NA	NA	NA	NA	NA	NA	NA	NA	NA	NA	NA	NA	NA	NA	NA	TRB	HomoSapiens	GILGFVFTL	M	InfluenzaA	Inf	TRBV17S1,TRBV19,TRBV19-1,TRBV19*01,TRBV19-1*01,TRBV19*03,TRBV19*02	TRBJ2-7*01,TRBJ1-1*01,TRBJ1-2*01,TRBJ2-1*01,TRBJ2-7	5	7	HLA-A*02:01,HLA-A*02	B2M	MHCI	PMID:27645996,PMID:25609818,PMID:28423320,PMID:28250417,PMID:29483513,PMID:28636589,PMID:21562156,https://www.10xgenomics.com/resources/application-notes/a-new-way-of-exploring-immunity-linking-highly-multiplexed-antigen-recognition-to-immune-repertoire-and-phenotype/#,PMID:29997621,PMID:28636592,PMID:7807026	3	HomoSapiens	TRB
472	CASSIRSSYEQYF	NA	4	4	NA	NA	NA	NA	NA	NA	NA	NA	NA	NA	NA	NA	NA	NA	NA	NA	NA	NA	NA	NA	NA	NA	NA	NA	NA	NA	NA	NA	TRB	HomoSapiens	GILGFVFTL	M	InfluenzaA	Inf	TRBV17S1,TRBV19,TRBV19-1,TRBV19*01,TRBV19-1*01,TRBV19*03,TRBV19*02	TRBJ2-7*01,TRBJ1-1*01,TRBJ1-2*01,TRBJ2-1*01,TRBJ2-7	5	7	HLA-A*02:01,HLA-A*02	B2M	MHCI	PMID:27645996,PMID:25609818,PMID:28423320,PMID:28250417,PMID:29483513,PMID:28636589,PMID:21562156,https://www.10xgenomics.com/resources/application-notes/a-new-way-of-exploring-immunity-linking-highly-multiplexed-antigen-recognition-to-immune-repertoire-and-phenotype/#,PMID:29997621,PMID:28636592,PMID:7807026	3	HomoSapiens	TRB
473	CASSIRSSYEQYF	NA	4	4	NA	NA	NA	NA	NA	NA	NA	NA	NA	NA	NA	NA	NA	NA	NA	NA	NA	NA	NA	NA	NA	NA	NA	NA	NA	NA	NA	NA	TRB	HomoSapiens	GILGFVFTL	M	InfluenzaA	Inf	TRBV17S1,TRBV19,TRBV19-1,TRBV19*01,TRBV19-1*01,TRBV19*03,TRBV19*02	TRBJ2-7*01,TRBJ1-1*01,TRBJ1-2*01,TRBJ2-1*01,TRBJ2-7	5	7	HLA-A*02:01,HLA-A*02	B2M	MHCI	PMID:27645996,PMID:25609818,PMID:28423320,PMID:28250417,PMID:29483513,PMID:28636589,PMID:21562156,https://www.10xgenomics.com/resources/application-notes/a-new-way-of-exploring-immunity-linking-highly-multiplexed-antigen-recognition-to-immune-repertoire-and-phenotype/#,PMID:29997621,PMID:28636592,PMID:7807026	3	HomoSapiens	TRB
474	CASSIRSSYEQYF	NA	4	4	NA	NA	NA	NA	NA	NA	NA	NA	NA	NA	NA	NA	NA	NA	NA	NA	NA	NA	NA	NA	NA	NA	NA	NA	NA	NA	NA	NA	TRB	HomoSapiens	GILGFVFTL	M	InfluenzaA	Inf	TRBV17S1,TRBV19,TRBV19-1,TRBV19*01,TRBV19-1*01,TRBV19*03,TRBV19*02	TRBJ2-7*01,TRBJ1-1*01,TRBJ1-2*01,TRBJ2-1*01,TRBJ2-7	5	7	HLA-A*02:01,HLA-A*02	B2M	MHCI	PMID:27645996,PMID:25609818,PMID:28423320,PMID:28250417,PMID:29483513,PMID:28636589,PMID:21562156,https://www.10xgenomics.com/resources/application-notes/a-new-way-of-exploring-immunity-linking-highly-multiplexed-antigen-recognition-to-immune-repertoire-and-phenotype/#,PMID:29997621,PMID:28636592,PMID:7807026	3	HomoSapiens	TRB
475	CASSIRSSYEQYF	NA	4	4	NA	NA	NA	NA	NA	NA	NA	NA	NA	NA	NA	NA	NA	NA	NA	NA	NA	NA	NA	NA	NA	NA	NA	NA	NA	NA	NA	NA	TRB	HomoSapiens	GILGFVFTL	M	InfluenzaA	Inf	TRBV17S1,TRBV19,TRBV19-1,TRBV19*01,TRBV19-1*01,TRBV19*03,TRBV19*02	TRBJ2-7*01,TRBJ1-1*01,TRBJ1-2*01,TRBJ2-1*01,TRBJ2-7	5	7	HLA-A*02:01,HLA-A*02	B2M	MHCI	PMID:27645996,PMID:25609818,PMID:28423320,PMID:28250417,PMID:29483513,PMID:28636589,PMID:21562156,https://www.10xgenomics.com/resources/application-notes/a-new-way-of-exploring-immunity-linking-highly-multiplexed-antigen-recognition-to-immune-repertoire-and-phenotype/#,PMID:29997621,PMID:28636592,PMID:7807026	3	HomoSapiens	TRB
476	CASSIRSSYEQYF	NA	4	4	NA	NA	NA	NA	NA	NA	NA	NA	NA	NA	NA	NA	NA	NA	NA	NA	NA	NA	NA	NA	NA	NA	NA	NA	NA	NA	NA	NA	TRB	HomoSapiens	GILGFVFTL	M	InfluenzaA	Inf	TRBV17S1,TRBV19,TRBV19-1,TRBV19*01,TRBV19-1*01,TRBV19*03,TRBV19*02	TRBJ2-7*01,TRBJ1-1*01,TRBJ1-2*01,TRBJ2-1*01,TRBJ2-7	5	7	HLA-A*02:01,HLA-A*02	B2M	MHCI	PMID:27645996,PMID:25609818,PMID:28423320,PMID:28250417,PMID:29483513,PMID:28636589,PMID:21562156,https://www.10xgenomics.com/resources/application-notes/a-new-way-of-exploring-immunity-linking-highly-multiplexed-antigen-recognition-to-immune-repertoire-and-phenotype/#,PMID:29997621,PMID:28636592,PMID:7807026	3	HomoSapiens	TRB
477	CASSIRSSYEQYF	NA	4	4	NA	NA	NA	NA	NA	NA	NA	NA	NA	NA	NA	NA	NA	NA	NA	NA	NA	NA	NA	NA	NA	NA	NA	NA	NA	NA	NA	NA	TRB	HomoSapiens	GILGFVFTL	M	InfluenzaA	Inf	TRBV17S1,TRBV19,TRBV19-1,TRBV19*01,TRBV19-1*01,TRBV19*03,TRBV19*02	TRBJ2-7*01,TRBJ1-1*01,TRBJ1-2*01,TRBJ2-1*01,TRBJ2-7	5	7	HLA-A*02:01,HLA-A*02	B2M	MHCI	PMID:27645996,PMID:25609818,PMID:28423320,PMID:28250417,PMID:29483513,PMID:28636589,PMID:21562156,https://www.10xgenomics.com/resources/application-notes/a-new-way-of-exploring-immunity-linking-highly-multiplexed-antigen-recognition-to-immune-repertoire-and-phenotype/#,PMID:29997621,PMID:28636592,PMID:7807026	3	HomoSapiens	TRB
478	CASSIRSSYEQYF	NA	4	4	NA	NA	NA	NA	NA	NA	NA	NA	NA	NA	NA	NA	NA	NA	NA	NA	NA	NA	NA	NA	NA	NA	NA	NA	NA	NA	NA	NA	TRB	HomoSapiens	GILGFVFTL	M	InfluenzaA	Inf	TRBV17S1,TRBV19,TRBV19-1,TRBV19*01,TRBV19-1*01,TRBV19*03,TRBV19*02	TRBJ2-7*01,TRBJ1-1*01,TRBJ1-2*01,TRBJ2-1*01,TRBJ2-7	5	7	HLA-A*02:01,HLA-A*02	B2M	MHCI	PMID:27645996,PMID:25609818,PMID:28423320,PMID:28250417,PMID:29483513,PMID:28636589,PMID:21562156,https://www.10xgenomics.com/resources/application-notes/a-new-way-of-exploring-immunity-linking-highly-multiplexed-antigen-recognition-to-immune-repertoire-and-phenotype/#,PMID:29997621,PMID:28636592,PMID:7807026	3	HomoSapiens	TRB
479	CASSIRSSYEQYF	NA	4	4	NA	NA	NA	NA	NA	NA	NA	NA	NA	NA	NA	NA	NA	NA	NA	NA	NA	NA	NA	NA	NA	NA	NA	NA	NA	NA	NA	NA	TRB	HomoSapiens	GILGFVFTL	M	InfluenzaA	Inf	TRBV17S1,TRBV19,TRBV19-1,TRBV19*01,TRBV19-1*01,TRBV19*03,TRBV19*02	TRBJ2-7*01,TRBJ1-1*01,TRBJ1-2*01,TRBJ2-1*01,TRBJ2-7	5	7	HLA-A*02:01,HLA-A*02	B2M	MHCI	PMID:27645996,PMID:25609818,PMID:28423320,PMID:28250417,PMID:29483513,PMID:28636589,PMID:21562156,https://www.10xgenomics.com/resources/application-notes/a-new-way-of-exploring-immunity-linking-highly-multiplexed-antigen-recognition-to-immune-repertoire-and-phenotype/#,PMID:29997621,PMID:28636592,PMID:7807026	3	HomoSapiens	TRB
480	CASSIRSSYEQYF	NA	4	4	NA	NA	NA	NA	NA	NA	NA	NA	NA	NA	NA	NA	NA	NA	NA	NA	NA	NA	NA	NA	NA	NA	NA	NA	NA	NA	NA	NA	TRB	HomoSapiens	GILGFVFTL	M	InfluenzaA	Inf	TRBV17S1,TRBV19,TRBV19-1,TRBV19*01,TRBV19-1*01,TRBV19*03,TRBV19*02	TRBJ2-7*01,TRBJ1-1*01,TRBJ1-2*01,TRBJ2-1*01,TRBJ2-7	5	7	HLA-A*02:01,HLA-A*02	B2M	MHCI	PMID:27645996,PMID:25609818,PMID:28423320,PMID:28250417,PMID:29483513,PMID:28636589,PMID:21562156,https://www.10xgenomics.com/resources/application-notes/a-new-way-of-exploring-immunity-linking-highly-multiplexed-antigen-recognition-to-immune-repertoire-and-phenotype/#,PMID:29997621,PMID:28636592,PMID:7807026	3	HomoSapiens	TRB
481	CASSIRSSYEQYF	NA	4	4	NA	NA	NA	NA	NA	NA	NA	NA	NA	NA	NA	NA	NA	NA	NA	NA	NA	NA	NA	NA	NA	NA	NA	NA	NA	NA	NA	NA	TRB	HomoSapiens	GILGFVFTL	M	InfluenzaA	Inf	TRBV17S1,TRBV19,TRBV19-1,TRBV19*01,TRBV19-1*01,TRBV19*03,TRBV19*02	TRBJ2-7*01,TRBJ1-1*01,TRBJ1-2*01,TRBJ2-1*01,TRBJ2-7	5	7	HLA-A*02:01,HLA-A*02	B2M	MHCI	PMID:27645996,PMID:25609818,PMID:28423320,PMID:28250417,PMID:29483513,PMID:28636589,PMID:21562156,https://www.10xgenomics.com/resources/application-notes/a-new-way-of-exploring-immunity-linking-highly-multiplexed-antigen-recognition-to-immune-repertoire-and-phenotype/#,PMID:29997621,PMID:28636592,PMID:7807026	3	HomoSapiens	TRB
482	CASSIRSSYEQYF	NA	4	4	NA	NA	NA	NA	NA	NA	NA	NA	NA	NA	NA	NA	NA	NA	NA	NA	NA	NA	NA	NA	NA	NA	NA	NA	NA	NA	NA	NA	TRB	HomoSapiens	GILGFVFTL	M	InfluenzaA	Inf	TRBV17S1,TRBV19,TRBV19-1,TRBV19*01,TRBV19-1*01,TRBV19*03,TRBV19*02	TRBJ2-7*01,TRBJ1-1*01,TRBJ1-2*01,TRBJ2-1*01,TRBJ2-7	5	7	HLA-A*02:01,HLA-A*02	B2M	MHCI	PMID:27645996,PMID:25609818,PMID:28423320,PMID:28250417,PMID:29483513,PMID:28636589,PMID:21562156,https://www.10xgenomics.com/resources/application-notes/a-new-way-of-exploring-immunity-linking-highly-multiplexed-antigen-recognition-to-immune-repertoire-and-phenotype/#,PMID:29997621,PMID:28636592,PMID:7807026	3	HomoSapiens	TRB
483	CASSIRSSYEQYF	NA	4	4	NA	NA	NA	NA	NA	NA	NA	NA	NA	NA	NA	NA	NA	NA	NA	NA	NA	NA	NA	NA	NA	NA	NA	NA	NA	NA	NA	NA	TRB	HomoSapiens	GILGFVFTL	M	InfluenzaA	Inf	TRBV17S1,TRBV19,TRBV19-1,TRBV19*01,TRBV19-1*01,TRBV19*03,TRBV19*02	TRBJ2-7*01,TRBJ1-1*01,TRBJ1-2*01,TRBJ2-1*01,TRBJ2-7	5	7	HLA-A*02:01,HLA-A*02	B2M	MHCI	PMID:27645996,PMID:25609818,PMID:28423320,PMID:28250417,PMID:29483513,PMID:28636589,PMID:21562156,https://www.10xgenomics.com/resources/application-notes/a-new-way-of-exploring-immunity-linking-highly-multiplexed-antigen-recognition-to-immune-repertoire-and-phenotype/#,PMID:29997621,PMID:28636592,PMID:7807026	3	HomoSapiens	TRB
484	CASSIRSSYEQYF	NA	4	4	NA	NA	NA	NA	NA	NA	NA	NA	NA	NA	NA	NA	NA	NA	NA	NA	NA	NA	NA	NA	NA	NA	NA	NA	NA	NA	NA	NA	TRB	HomoSapiens	ELAGIGILTV	MLANA	HomoSapiens	2891	TRBV19	TRBJ2-7	5	7	HLA-A*02:01	B2M	MHCI	https://www.10xgenomics.com/resources/application-notes/a-new-way-of-exploring-immunity-linking-highly-multiplexed-antigen-recognition-to-immune-repertoire-and-phenotype/#	0	HomoSapiens	TRB
485	CASSIRSSYEQYF	NA	4	4	NA	NA	NA	NA	NA	NA	NA	NA	NA	NA	NA	NA	NA	NA	NA	NA	NA	NA	NA	NA	NA	NA	NA	NA	NA	NA	NA	NA	TRB	HomoSapiens	ELAGIGILTV	MLANA	HomoSapiens	2891	TRBV19	TRBJ2-7	5	7	HLA-A*02:01	B2M	MHCI	https://www.10xgenomics.com/resources/application-notes/a-new-way-of-exploring-immunity-linking-highly-multiplexed-antigen-recognition-to-immune-repertoire-and-phenotype/#	0	HomoSapiens	TRB
486	CASSIRSSYEQYF	NA	4	4	NA	NA	NA	NA	NA	NA	NA	NA	NA	NA	NA	NA	NA	NA	NA	NA	NA	NA	NA	NA	NA	NA	NA	NA	NA	NA	NA	NA	TRB	HomoSapiens	ELAGIGILTV	MLANA	HomoSapiens	2891	TRBV19	TRBJ2-7	5	7	HLA-A*02:01	B2M	MHCI	https://www.10xgenomics.com/resources/application-notes/a-new-way-of-exploring-immunity-linking-highly-multiplexed-antigen-recognition-to-immune-repertoire-and-phenotype/#	0	HomoSapiens	TRB
487	CASSIRSSYEQYF	NA	4	4	NA	NA	NA	NA	NA	NA	NA	NA	NA	NA	NA	NA	NA	NA	NA	NA	NA	NA	NA	NA	NA	NA	NA	NA	NA	NA	NA	NA	TRB	HomoSapiens	ELAGIGILTV	MLANA	HomoSapiens	2891	TRBV19	TRBJ2-7	5	7	HLA-A*02:01	B2M	MHCI	https://www.10xgenomics.com/resources/application-notes/a-new-way-of-exploring-immunity-linking-highly-multiplexed-antigen-recognition-to-immune-repertoire-and-phenotype/#	0	HomoSapiens	TRB
488	CASSIRSSYEQYF	NA	4	4	NA	NA	NA	NA	NA	NA	NA	NA	NA	NA	NA	NA	NA	NA	NA	NA	NA	NA	NA	NA	NA	NA	NA	NA	NA	NA	NA	NA	TRB	HomoSapiens	ELAGIGILTV	MLANA	HomoSapiens	2891	TRBV19	TRBJ2-7	5	7	HLA-A*02:01	B2M	MHCI	https://www.10xgenomics.com/resources/application-notes/a-new-way-of-exploring-immunity-linking-highly-multiplexed-antigen-recognition-to-immune-repertoire-and-phenotype/#	0	HomoSapiens	TRB
489	CASSIRSSYEQYF	NA	4	4	NA	NA	NA	NA	NA	NA	NA	NA	NA	NA	NA	NA	NA	NA	NA	NA	NA	NA	NA	NA	NA	NA	NA	NA	NA	NA	NA	NA	TRB	HomoSapiens	ELAGIGILTV	MLANA	HomoSapiens	2891	TRBV19	TRBJ2-7	5	7	HLA-A*02:01	B2M	MHCI	https://www.10xgenomics.com/resources/application-notes/a-new-way-of-exploring-immunity-linking-highly-multiplexed-antigen-recognition-to-immune-repertoire-and-phenotype/#	0	HomoSapiens	TRB
490	CASSIRSSYEQYF	NA	4	4	NA	NA	NA	NA	NA	NA	NA	NA	NA	NA	NA	NA	NA	NA	NA	NA	NA	NA	NA	NA	NA	NA	NA	NA	NA	NA	NA	NA	TRB	HomoSapiens	ELAGIGILTV	MLANA	HomoSapiens	2891	TRBV19	TRBJ2-7	5	7	HLA-A*02:01	B2M	MHCI	https://www.10xgenomics.com/resources/application-notes/a-new-way-of-exploring-immunity-linking-highly-multiplexed-antigen-recognition-to-immune-repertoire-and-phenotype/#	0	HomoSapiens	TRB
491	CASSIRSSYEQYF	NA	4	4	NA	NA	NA	NA	NA	NA	NA	NA	NA	NA	NA	NA	NA	NA	NA	NA	NA	NA	NA	NA	NA	NA	NA	NA	NA	NA	NA	NA	TRB	HomoSapiens	ELAGIGILTV	MLANA	HomoSapiens	2891	TRBV19	TRBJ2-7	5	7	HLA-A*02:01	B2M	MHCI	https://www.10xgenomics.com/resources/application-notes/a-new-way-of-exploring-immunity-linking-highly-multiplexed-antigen-recognition-to-immune-repertoire-and-phenotype/#	0	HomoSapiens	TRB
492	CASSIRSSYEQYF	NA	4	4	NA	NA	NA	NA	NA	NA	NA	NA	NA	NA	NA	NA	NA	NA	NA	NA	NA	NA	NA	NA	NA	NA	NA	NA	NA	NA	NA	NA	TRB	HomoSapiens	ELAGIGILTV	MLANA	HomoSapiens	2891	TRBV19	TRBJ2-7	5	7	HLA-A*02:01	B2M	MHCI	https://www.10xgenomics.com/resources/application-notes/a-new-way-of-exploring-immunity-linking-highly-multiplexed-antigen-recognition-to-immune-repertoire-and-phenotype/#	0	HomoSapiens	TRB
493	CASSIRSSYEQYF	NA	4	4	NA	NA	NA	NA	NA	NA	NA	NA	NA	NA	NA	NA	NA	NA	NA	NA	NA	NA	NA	NA	NA	NA	NA	NA	NA	NA	NA	NA	TRB	HomoSapiens	ELAGIGILTV	MLANA	HomoSapiens	2891	TRBV19	TRBJ2-7	5	7	HLA-A*02:01	B2M	MHCI	https://www.10xgenomics.com/resources/application-notes/a-new-way-of-exploring-immunity-linking-highly-multiplexed-antigen-recognition-to-immune-repertoire-and-phenotype/#	0	HomoSapiens	TRB
494	CASSIRSSYEQYF	NA	4	4	NA	NA	NA	NA	NA	NA	NA	NA	NA	NA	NA	NA	NA	NA	NA	NA	NA	NA	NA	NA	NA	NA	NA	NA	NA	NA	NA	NA	TRB	HomoSapiens	ELAGIGILTV	MLANA	HomoSapiens	2891	TRBV19	TRBJ2-7	5	7	HLA-A*02:01	B2M	MHCI	https://www.10xgenomics.com/resources/application-notes/a-new-way-of-exploring-immunity-linking-highly-multiplexed-antigen-recognition-to-immune-repertoire-and-phenotype/#	0	HomoSapiens	TRB
495	CASSIRSSYEQYF	NA	4	4	NA	NA	NA	NA	NA	NA	NA	NA	NA	NA	NA	NA	NA	NA	NA	NA	NA	NA	NA	NA	NA	NA	NA	NA	NA	NA	NA	NA	TRB	HomoSapiens	ELAGIGILTV	MLANA	HomoSapiens	2891	TRBV19	TRBJ2-7	5	7	HLA-A*02:01	B2M	MHCI	https://www.10xgenomics.com/resources/application-notes/a-new-way-of-exploring-immunity-linking-highly-multiplexed-antigen-recognition-to-immune-repertoire-and-phenotype/#	0	HomoSapiens	TRB
496	CASSIRSSYEQYF	NA	4	4	NA	NA	NA	NA	NA	NA	NA	NA	NA	NA	NA	NA	NA	NA	NA	NA	NA	NA	NA	NA	NA	NA	NA	NA	NA	NA	NA	NA	TRB	HomoSapiens	ELAGIGILTV	MLANA	HomoSapiens	2891	TRBV19	TRBJ2-7	5	7	HLA-A*02:01	B2M	MHCI	https://www.10xgenomics.com/resources/application-notes/a-new-way-of-exploring-immunity-linking-highly-multiplexed-antigen-recognition-to-immune-repertoire-and-phenotype/#	0	HomoSapiens	TRB
497	CASSIRSSYEQYF	NA	4	4	NA	NA	NA	NA	NA	NA	NA	NA	NA	NA	NA	NA	NA	NA	NA	NA	NA	NA	NA	NA	NA	NA	NA	NA	NA	NA	NA	NA	TRB	HomoSapiens	ELAGIGILTV	MLANA	HomoSapiens	2891	TRBV19	TRBJ2-7	5	7	HLA-A*02:01	B2M	MHCI	https://www.10xgenomics.com/resources/application-notes/a-new-way-of-exploring-immunity-linking-highly-multiplexed-antigen-recognition-to-immune-repertoire-and-phenotype/#	0	HomoSapiens	TRB
498	CASSIRSSYEQYF	NA	4	4	NA	NA	NA	NA	NA	NA	NA	NA	NA	NA	NA	NA	NA	NA	NA	NA	NA	NA	NA	NA	NA	NA	NA	NA	NA	NA	NA	NA	TRB	HomoSapiens	ELAGIGILTV	MLANA	HomoSapiens	2891	TRBV19	TRBJ2-7	5	7	HLA-A*02:01	B2M	MHCI	https://www.10xgenomics.com/resources/application-notes/a-new-way-of-exploring-immunity-linking-highly-multiplexed-antigen-recognition-to-immune-repertoire-and-phenotype/#	0	HomoSapiens	TRB
499	CASSIRSSYEQYF	NA	4	4	NA	NA	NA	NA	NA	NA	NA	NA	NA	NA	NA	NA	NA	NA	NA	NA	NA	NA	NA	NA	NA	NA	NA	NA	NA	NA	NA	NA	TRB	HomoSapiens	ELAGIGILTV	MLANA	HomoSapiens	2891	TRBV19	TRBJ2-7	5	7	HLA-A*02:01	B2M	MHCI	https://www.10xgenomics.com/resources/application-notes/a-new-way-of-exploring-immunity-linking-highly-multiplexed-antigen-recognition-to-immune-repertoire-and-phenotype/#	0	HomoSapiens	TRB
500	CASSIRSSYEQYF	NA	4	4	NA	NA	NA	NA	NA	NA	NA	NA	NA	NA	NA	NA	NA	NA	NA	NA	NA	NA	NA	NA	NA	NA	NA	NA	NA	NA	NA	NA	TRB	HomoSapiens	ELAGIGILTV	MLANA	HomoSapiens	2891	TRBV19	TRBJ2-7	5	7	HLA-A*02:01	B2M	MHCI	https://www.10xgenomics.com/resources/application-notes/a-new-way-of-exploring-immunity-linking-highly-multiplexed-antigen-recognition-to-immune-repertoire-and-phenotype/#	0	HomoSapiens	TRB
501	CASSIRSSYEQYF	NA	4	4	NA	NA	NA	NA	NA	NA	NA	NA	NA	NA	NA	NA	NA	NA	NA	NA	NA	NA	NA	NA	NA	NA	NA	NA	NA	NA	NA	NA	TRB	HomoSapiens	ELAGIGILTV	MLANA	HomoSapiens	2891	TRBV19	TRBJ2-7	5	7	HLA-A*02:01	B2M	MHCI	https://www.10xgenomics.com/resources/application-notes/a-new-way-of-exploring-immunity-linking-highly-multiplexed-antigen-recognition-to-immune-repertoire-and-phenotype/#	0	HomoSapiens	TRB
502	CASSIRSSYEQYF	NA	4	4	NA	NA	NA	NA	NA	NA	NA	NA	NA	NA	NA	NA	NA	NA	NA	NA	NA	NA	NA	NA	NA	NA	NA	NA	NA	NA	NA	NA	TRB	HomoSapiens	ELAGIGILTV	MLANA	HomoSapiens	2891	TRBV19	TRBJ2-7	5	7	HLA-A*02:01	B2M	MHCI	https://www.10xgenomics.com/resources/application-notes/a-new-way-of-exploring-immunity-linking-highly-multiplexed-antigen-recognition-to-immune-repertoire-and-phenotype/#	0	HomoSapiens	TRB
503	CASSIRSSYEQYF	NA	4	4	NA	NA	NA	NA	NA	NA	NA	NA	NA	NA	NA	NA	NA	NA	NA	NA	NA	NA	NA	NA	NA	NA	NA	NA	NA	NA	NA	NA	TRB	HomoSapiens	ELAGIGILTV	MLANA	HomoSapiens	2891	TRBV19	TRBJ2-7	5	7	HLA-A*02:01	B2M	MHCI	https://www.10xgenomics.com/resources/application-notes/a-new-way-of-exploring-immunity-linking-highly-multiplexed-antigen-recognition-to-immune-repertoire-and-phenotype/#	0	HomoSapiens	TRB
504	CASSIRSSYEQYF	NA	4	4	NA	NA	NA	NA	NA	NA	NA	NA	NA	NA	NA	NA	NA	NA	NA	NA	NA	NA	NA	NA	NA	NA	NA	NA	NA	NA	NA	NA	TRB	HomoSapiens	ELAGIGILTV	MLANA	HomoSapiens	2891	TRBV19	TRBJ2-7	5	7	HLA-A*02:01	B2M	MHCI	https://www.10xgenomics.com/resources/application-notes/a-new-way-of-exploring-immunity-linking-highly-multiplexed-antigen-recognition-to-immune-repertoire-and-phenotype/#	0	HomoSapiens	TRB
505	CASSIRSSYEQYF	NA	4	4	NA	NA	NA	NA	NA	NA	NA	NA	NA	NA	NA	NA	NA	NA	NA	NA	NA	NA	NA	NA	NA	NA	NA	NA	NA	NA	NA	NA	TRB	HomoSapiens	ELAGIGILTV	MLANA	HomoSapiens	2891	TRBV19	TRBJ2-7	5	7	HLA-A*02:01	B2M	MHCI	https://www.10xgenomics.com/resources/application-notes/a-new-way-of-exploring-immunity-linking-highly-multiplexed-antigen-recognition-to-immune-repertoire-and-phenotype/#	0	HomoSapiens	TRB
506	CASSIRSSYEQYF	NA	4	4	NA	NA	NA	NA	NA	NA	NA	NA	NA	NA	NA	NA	NA	NA	NA	NA	NA	NA	NA	NA	NA	NA	NA	NA	NA	NA	NA	NA	TRB	HomoSapiens	ELAGIGILTV	MLANA	HomoSapiens	2891	TRBV19	TRBJ2-7	5	7	HLA-A*02:01	B2M	MHCI	https://www.10xgenomics.com/resources/application-notes/a-new-way-of-exploring-immunity-linking-highly-multiplexed-antigen-recognition-to-immune-repertoire-and-phenotype/#	0	HomoSapiens	TRB
507	CASSIRSSYEQYF	NA	4	4	NA	NA	NA	NA	NA	NA	NA	NA	NA	NA	NA	NA	NA	NA	NA	NA	NA	NA	NA	NA	NA	NA	NA	NA	NA	NA	NA	NA	TRB	HomoSapiens	ELAGIGILTV	MLANA	HomoSapiens	2891	TRBV19	TRBJ2-7	5	7	HLA-A*02:01	B2M	MHCI	https://www.10xgenomics.com/resources/application-notes/a-new-way-of-exploring-immunity-linking-highly-multiplexed-antigen-recognition-to-immune-repertoire-and-phenotype/#	0	HomoSapiens	TRB
508	CASSIRSSYEQYF	NA	4	4	NA	NA	NA	NA	NA	NA	NA	NA	NA	NA	NA	NA	NA	NA	NA	NA	NA	NA	NA	NA	NA	NA	NA	NA	NA	NA	NA	NA	TRB	HomoSapiens	ELAGIGILTV	MLANA	HomoSapiens	2891	TRBV19	TRBJ2-7	5	7	HLA-A*02:01	B2M	MHCI	https://www.10xgenomics.com/resources/application-notes/a-new-way-of-exploring-immunity-linking-highly-multiplexed-antigen-recognition-to-immune-repertoire-and-phenotype/#	0	HomoSapiens	TRB
509	CASSIRSSYEQYF	NA	4	4	NA	NA	NA	NA	NA	NA	NA	NA	NA	NA	NA	NA	NA	NA	NA	NA	NA	NA	NA	NA	NA	NA	NA	NA	NA	NA	NA	NA	TRB	HomoSapiens	ELAGIGILTV	MLANA	HomoSapiens	2891	TRBV19	TRBJ2-7	5	7	HLA-A*02:01	B2M	MHCI	https://www.10xgenomics.com/resources/application-notes/a-new-way-of-exploring-immunity-linking-highly-multiplexed-antigen-recognition-to-immune-repertoire-and-phenotype/#	0	HomoSapiens	TRB
510	CASSIRSSYEQYF	NA	4	4	NA	NA	NA	NA	NA	NA	NA	NA	NA	NA	NA	NA	NA	NA	NA	NA	NA	NA	NA	NA	NA	NA	NA	NA	NA	NA	NA	NA	TRB	HomoSapiens	ELAGIGILTV	MLANA	HomoSapiens	2891	TRBV19	TRBJ2-7	5	7	HLA-A*02:01	B2M	MHCI	https://www.10xgenomics.com/resources/application-notes/a-new-way-of-exploring-immunity-linking-highly-multiplexed-antigen-recognition-to-immune-repertoire-and-phenotype/#	0	HomoSapiens	TRB
511	CASSIRSSYEQYF	NA	4	4	NA	NA	NA	NA	NA	NA	NA	NA	NA	NA	NA	NA	NA	NA	NA	NA	NA	NA	NA	NA	NA	NA	NA	NA	NA	NA	NA	NA	TRB	HomoSapiens	ELAGIGILTV	MLANA	HomoSapiens	2891	TRBV19	TRBJ2-7	5	7	HLA-A*02:01	B2M	MHCI	https://www.10xgenomics.com/resources/application-notes/a-new-way-of-exploring-immunity-linking-highly-multiplexed-antigen-recognition-to-immune-repertoire-and-phenotype/#	0	HomoSapiens	TRB
512	CASSIRSSYEQYF	NA	4	4	NA	NA	NA	NA	NA	NA	NA	NA	NA	NA	NA	NA	NA	NA	NA	NA	NA	NA	NA	NA	NA	NA	NA	NA	NA	NA	NA	NA	TRB	HomoSapiens	ELAGIGILTV	MLANA	HomoSapiens	2891	TRBV19	TRBJ2-7	5	7	HLA-A*02:01	B2M	MHCI	https://www.10xgenomics.com/resources/application-notes/a-new-way-of-exploring-immunity-linking-highly-multiplexed-antigen-recognition-to-immune-repertoire-and-phenotype/#	0	HomoSapiens	TRB
513	CASSIRSSYEQYF	NA	4	4	NA	NA	NA	NA	NA	NA	NA	NA	NA	NA	NA	NA	NA	NA	NA	NA	NA	NA	NA	NA	NA	NA	NA	NA	NA	NA	NA	NA	TRB	HomoSapiens	ELAGIGILTV	MLANA	HomoSapiens	2891	TRBV19	TRBJ2-7	5	7	HLA-A*02:01	B2M	MHCI	https://www.10xgenomics.com/resources/application-notes/a-new-way-of-exploring-immunity-linking-highly-multiplexed-antigen-recognition-to-immune-repertoire-and-phenotype/#	0	HomoSapiens	TRB
514	CASSIRSSYEQYF	NA	4	4	NA	NA	NA	NA	NA	NA	NA	NA	NA	NA	NA	NA	NA	NA	NA	NA	NA	NA	NA	NA	NA	NA	NA	NA	NA	NA	NA	NA	TRB	HomoSapiens	ELAGIGILTV	MLANA	HomoSapiens	2891	TRBV19	TRBJ2-7	5	7	HLA-A*02:01	B2M	MHCI	https://www.10xgenomics.com/resources/application-notes/a-new-way-of-exploring-immunity-linking-highly-multiplexed-antigen-recognition-to-immune-repertoire-and-phenotype/#	0	HomoSapiens	TRB
515	CASSIRSSYEQYF	NA	4	4	NA	NA	NA	NA	NA	NA	NA	NA	NA	NA	NA	NA	NA	NA	NA	NA	NA	NA	NA	NA	NA	NA	NA	NA	NA	NA	NA	NA	TRB	HomoSapiens	ELAGIGILTV	MLANA	HomoSapiens	2891	TRBV19	TRBJ2-7	5	7	HLA-A*02:01	B2M	MHCI	https://www.10xgenomics.com/resources/application-notes/a-new-way-of-exploring-immunity-linking-highly-multiplexed-antigen-recognition-to-immune-repertoire-and-phenotype/#	0	HomoSapiens	TRB
516	CASSIRSSYEQYF	NA	4	4	NA	NA	NA	NA	NA	NA	NA	NA	NA	NA	NA	NA	NA	NA	NA	NA	NA	NA	NA	NA	NA	NA	NA	NA	NA	NA	NA	NA	TRB	HomoSapiens	ELAGIGILTV	MLANA	HomoSapiens	2891	TRBV19	TRBJ2-7	5	7	HLA-A*02:01	B2M	MHCI	https://www.10xgenomics.com/resources/application-notes/a-new-way-of-exploring-immunity-linking-highly-multiplexed-antigen-recognition-to-immune-repertoire-and-phenotype/#	0	HomoSapiens	TRB
517	CASSIRSSYEQYF	NA	4	4	NA	NA	NA	NA	NA	NA	NA	NA	NA	NA	NA	NA	NA	NA	NA	NA	NA	NA	NA	NA	NA	NA	NA	NA	NA	NA	NA	NA	TRB	HomoSapiens	ELAGIGILTV	MLANA	HomoSapiens	2891	TRBV19	TRBJ2-7	5	7	HLA-A*02:01	B2M	MHCI	https://www.10xgenomics.com/resources/application-notes/a-new-way-of-exploring-immunity-linking-highly-multiplexed-antigen-recognition-to-immune-repertoire-and-phenotype/#	0	HomoSapiens	TRB
518	CASSIRSSYEQYF	NA	4	4	NA	NA	NA	NA	NA	NA	NA	NA	NA	NA	NA	NA	NA	NA	NA	NA	NA	NA	NA	NA	NA	NA	NA	NA	NA	NA	NA	NA	TRB	HomoSapiens	ELAGIGILTV	MLANA	HomoSapiens	2891	TRBV19	TRBJ2-7	5	7	HLA-A*02:01	B2M	MHCI	https://www.10xgenomics.com/resources/application-notes/a-new-way-of-exploring-immunity-linking-highly-multiplexed-antigen-recognition-to-immune-repertoire-and-phenotype/#	0	HomoSapiens	TRB
519	CASSIRSSYEQYF	NA	4	4	NA	NA	NA	NA	NA	NA	NA	NA	NA	NA	NA	NA	NA	NA	NA	NA	NA	NA	NA	NA	NA	NA	NA	NA	NA	NA	NA	NA	TRB	HomoSapiens	ELAGIGILTV	MLANA	HomoSapiens	2891	TRBV19	TRBJ2-7	5	7	HLA-A*02:01	B2M	MHCI	https://www.10xgenomics.com/resources/application-notes/a-new-way-of-exploring-immunity-linking-highly-multiplexed-antigen-recognition-to-immune-repertoire-and-phenotype/#	0	HomoSapiens	TRB
520	CASSIRSSYEQYF	NA	4	4	NA	NA	NA	NA	NA	NA	NA	NA	NA	NA	NA	NA	NA	NA	NA	NA	NA	NA	NA	NA	NA	NA	NA	NA	NA	NA	NA	NA	TRB	HomoSapiens	ELAGIGILTV	MLANA	HomoSapiens	2891	TRBV19	TRBJ2-7	5	7	HLA-A*02:01	B2M	MHCI	https://www.10xgenomics.com/resources/application-notes/a-new-way-of-exploring-immunity-linking-highly-multiplexed-antigen-recognition-to-immune-repertoire-and-phenotype/#	0	HomoSapiens	TRB
521	CASSIRSSYEQYF	NA	4	4	NA	NA	NA	NA	NA	NA	NA	NA	NA	NA	NA	NA	NA	NA	NA	NA	NA	NA	NA	NA	NA	NA	NA	NA	NA	NA	NA	NA	TRB	HomoSapiens	ELAGIGILTV	MLANA	HomoSapiens	2891	TRBV19	TRBJ2-7	5	7	HLA-A*02:01	B2M	MHCI	https://www.10xgenomics.com/resources/application-notes/a-new-way-of-exploring-immunity-linking-highly-multiplexed-antigen-recognition-to-immune-repertoire-and-phenotype/#	0	HomoSapiens	TRB
522	CASSEGQGNTEAFF	NA	NA	2	NA	NA	NA	NA	NA	NA	NA	NA	NA	NA	NA	NA	NA	NA	NA	NA	NA	NA	NA	NA	NA	NA	NA	NA	NA	NA	NA	NA	TRB	HomoSapiens	KLGGALQAK	IE1	CMV	13020	TRBV9	TRBJ1-1	4	8	HLA-A*03:01	B2M	MHCI	https://www.10xgenomics.com/resources/application-notes/a-new-way-of-exploring-immunity-linking-highly-multiplexed-antigen-recognition-to-immune-repertoire-and-phenotype/#	0	HomoSapiens	TRB
523	CASSLEGQPQHF	NA	2	NA	NA	NA	NA	NA	NA	NA	NA	NA	NA	NA	NA	NA	NA	NA	NA	NA	NA	NA	NA	NA	NA	NA	NA	NA	NA	NA	NA	NA	NA	NA	NA	NA	NA	NA	NA	NA	NA	NA	NA	NA	NA	NA	NA	NA	NA
524	CASSLGSGNQPQHF	NA	2	NA	NA	NA	NA	NA	NA	NA	NA	NA	NA	NA	NA	NA	NA	NA	NA	NA	NA	NA	NA	NA	NA	NA	NA	NA	NA	NA	NA	NA	NA	NA	NA	NA	NA	NA	NA	NA	NA	NA	NA	NA	NA	NA	NA	NA	NA
525	CASSLTSGPYNEQFF	NA	2	2	NA	NA	NA	NA	NA	NA	NA	NA	NA	NA	NA	NA	NA	NA	NA	NA	NA	NA	NA	NA	NA	NA	NA	NA	NA	NA	NA	NA	TRB	HomoSapiens	KLGGALQAK	IE1	CMV	19433	TRBV7-2	TRBJ2-1	5	9	HLA-A*03:01	B2M	MHCI	https://www.10xgenomics.com/resources/application-notes/a-new-way-of-exploring-immunity-linking-highly-multiplexed-antigen-recognition-to-immune-repertoire-and-phenotype/#	0	HomoSapiens	TRB
526	CASSPGQGGNQPQHF	NA	NA	2	NA	NA	NA	NA	NA	NA	NA	NA	NA	NA	NA	NA	NA	NA	NA	NA	NA	NA	NA	NA	NA	NA	NA	NA	NA	NA	NA	NA	TRB	HomoSapiens	KLGGALQAK	IE1	CMV	19066	TRBV10-2	TRBJ1-5	4	9	HLA-A*03:01	B2M	MHCI	https://www.10xgenomics.com/resources/application-notes/a-new-way-of-exploring-immunity-linking-highly-multiplexed-antigen-recognition-to-immune-repertoire-and-phenotype/#	0	HomoSapiens	TRB
527	CASSPGTGTYGYTF	2	2	2	NA	Human	Pathogens	Cytomegalovirus (CMV)	D003586	NA	1	Yes	pp50	P16790	VTEHDTLLY	71290	HLA-A1	PBMC	CD8	NA	NA	NA	NA	TRBV10-2	NA	TRBJ1-2	No	TGCGCCAGCAGTCCCGGGACAGGGACCTATGGCTACACCTTC	NA	28636589	NA	TRB	TRB	HomoSapiens	VTEHDTLLY	pp50	CMV	0	TRBV10-2	TRBJ1-2	4	9	HLA-A*01:01	B2M	MHCI	PMID:28636589	1	HomoSapiens	TRB
528	CASSSDFYEQYF	NA	NA	2	NA	NA	NA	NA	NA	NA	NA	NA	NA	NA	NA	NA	NA	NA	NA	NA	NA	NA	NA	NA	NA	NA	NA	NA	NA	NA	NA	NA	TRB	HomoSapiens	KLGGALQAK	IE1	CMV	18507	TRBV5-5	TRBJ2-7	4	7	HLA-A*03:01	B2M	MHCI	https://www.10xgenomics.com/resources/application-notes/a-new-way-of-exploring-immunity-linking-highly-multiplexed-antigen-recognition-to-immune-repertoire-and-phenotype/#	0	HomoSapiens	TRB
529	CASSTRAAYEQYF	NA	2	2	NA	NA	NA	NA	NA	NA	NA	NA	NA	NA	NA	NA	NA	NA	NA	NA	NA	NA	NA	NA	NA	NA	NA	NA	NA	NA	NA	NA	TRB	HomoSapiens	GILGFVFTL	M	InfluenzaA	5.68723E+11	TRBV19,TRBV19*01	TRBJ2-7*01,TRBJ2-7	4	8	HLA-A*02:01,HLA-A*02	B2M	MHCI	PMID:28423320,https://www.10xgenomics.com/resources/application-notes/a-new-way-of-exploring-immunity-linking-highly-multiplexed-antigen-recognition-to-immune-repertoire-and-phenotype/#,PMID:28636592	0	HomoSapiens	TRB
530	CASSFGGGTDTQYF	NA	2	2	NA	NA	NA	NA	NA	NA	NA	NA	NA	NA	NA	NA	NA	NA	NA	NA	NA	NA	NA	NA	NA	NA	NA	NA	NA	NA	NA	NA	TRB	HomoSapiens	NLVPMVATV	pp65	CMV	0	TRBV7-9	TRBJ2-3	4	8	HLA-A*02	B2M	MHCI	PMID:28423320	0	HomoSapiens	TRB
531	CASSLAGGINEQFF	NA	3	3	NA	NA	NA	NA	NA	NA	NA	NA	NA	NA	NA	NA	NA	NA	NA	NA	NA	NA	NA	NA	NA	NA	NA	NA	NA	NA	NA	NA	TRB	HomoSapiens	KLGGALQAK	IE1	CMV	14911	TRBV27	TRBJ2-1	5	9	HLA-A*03:01	B2M	MHCI	https://www.10xgenomics.com/resources/application-notes/a-new-way-of-exploring-immunity-linking-highly-multiplexed-antigen-recognition-to-immune-repertoire-and-phenotype/#	0	HomoSapiens	TRB
532	CASSLAGGINEQFF	NA	3	3	NA	NA	NA	NA	NA	NA	NA	NA	NA	NA	NA	NA	NA	NA	NA	NA	NA	NA	NA	NA	NA	NA	NA	NA	NA	NA	NA	NA	TRB	HomoSapiens	NLVPMVATV	pp65	CMV	0	TRBV7-6	TRBJ2-1	5	9	HLA-A*02	B2M	MHCI	PMID:28423320	0	HomoSapiens	TRB
533	CASSLAGNTGELFF	NA	2	NA	NA	NA	NA	NA	NA	NA	NA	NA	NA	NA	NA	NA	NA	NA	NA	NA	NA	NA	NA	NA	NA	NA	NA	NA	NA	NA	NA	NA	NA	NA	NA	NA	NA	NA	NA	NA	NA	NA	NA	NA	NA	NA	NA	NA	NA
534	CASSLHNEQFF	NA	NA	3	NA	NA	NA	NA	NA	NA	NA	NA	NA	NA	NA	NA	NA	NA	NA	NA	NA	NA	NA	NA	NA	NA	NA	NA	NA	NA	NA	NA	TRB	HomoSapiens	GLCTLVAML	BMLF1	EBV	0	TRBV12-3	TRBJ2-1	5	6	HLA-A*02:01	B2M	MHCI	PMID:28636589	0	HomoSapiens	TRB
535	CASSLGTGELFF	NA	NA	3	NA	NA	NA	NA	NA	NA	NA	NA	NA	NA	NA	NA	NA	NA	NA	NA	NA	NA	NA	NA	NA	NA	NA	NA	NA	NA	NA	NA	TRB	HomoSapiens	KLGGALQAK	IE1	CMV	7519	TRBV12-4	TRBJ2-2	5	6	HLA-A*03:01	B2M	MHCI	https://www.10xgenomics.com/resources/application-notes/a-new-way-of-exploring-immunity-linking-highly-multiplexed-antigen-recognition-to-immune-repertoire-and-phenotype/#	0	HomoSapiens	TRB
536	CASAGETQYF	NA	1	1	NA	NA	NA	NA	NA	NA	NA	NA	NA	NA	NA	NA	NA	NA	NA	NA	NA	NA	NA	NA	NA	NA	NA	NA	NA	NA	NA	NA	TRB	HomoSapiens	EDVPSGKLFMHVTLG	pp65	CMV	0	TRBV11-3	TRBJ2-5	3	5	HLA-A*02:01	B2M	MHCI	PMID:19776383	0	HomoSapiens	TRB
537	CASGNSYEQYF	NA	NA	1	NA	NA	NA	NA	NA	NA	NA	NA	NA	NA	NA	NA	NA	NA	NA	NA	NA	NA	NA	NA	NA	NA	NA	NA	NA	NA	NA	NA	TRB	HomoSapiens	KLGGALQAK	IE1	CMV	18541	TRBV10-2	TRBJ2-7	3	5	HLA-A*03:01	B2M	MHCI	https://www.10xgenomics.com/resources/application-notes/a-new-way-of-exploring-immunity-linking-highly-multiplexed-antigen-recognition-to-immune-repertoire-and-phenotype/#	0	HomoSapiens	TRB
538	CASGTGGTEAFF	NA	1	NA	NA	NA	NA	NA	NA	NA	NA	NA	NA	NA	NA	NA	NA	NA	NA	NA	NA	NA	NA	NA	NA	NA	NA	NA	NA	NA	NA	NA	NA	NA	NA	NA	NA	NA	NA	NA	NA	NA	NA	NA	NA	NA	NA	NA	NA
539	CASKGGLGTEAFF	NA	NA	1	NA	NA	NA	NA	NA	NA	NA	NA	NA	NA	NA	NA	NA	NA	NA	NA	NA	NA	NA	NA	NA	NA	NA	NA	NA	NA	NA	NA	TRB	HomoSapiens	KLGGALQAK	IE1	CMV	18860	TRBV7-3	TRBJ1-1	3	8	HLA-A*03:01	B2M	MHCI	https://www.10xgenomics.com/resources/application-notes/a-new-way-of-exploring-immunity-linking-highly-multiplexed-antigen-recognition-to-immune-repertoire-and-phenotype/#	0	HomoSapiens	TRB
540	CASRGAGGTGELFF	NA	1	NA	NA	NA	NA	NA	NA	NA	NA	NA	NA	NA	NA	NA	NA	NA	NA	NA	NA	NA	NA	NA	NA	NA	NA	NA	NA	NA	NA	NA	NA	NA	NA	NA	NA	NA	NA	NA	NA	NA	NA	NA	NA	NA	NA	NA	NA
541	CASSENRDTDTQYF	NA	1	NA	NA	NA	NA	NA	NA	NA	NA	NA	NA	NA	NA	NA	NA	NA	NA	NA	NA	NA	NA	NA	NA	NA	NA	NA	NA	NA	NA	NA	NA	NA	NA	NA	NA	NA	NA	NA	NA	NA	NA	NA	NA	NA	NA	NA	NA
542	CASSERVNTEAFF	NA	1	NA	NA	NA	NA	NA	NA	NA	NA	NA	NA	NA	NA	NA	NA	NA	NA	NA	NA	NA	NA	NA	NA	NA	NA	NA	NA	NA	NA	NA	NA	NA	NA	NA	NA	NA	NA	NA	NA	NA	NA	NA	NA	NA	NA	NA	NA
543	CASSETGGTEAFF	NA	1	1	NA	NA	NA	NA	NA	NA	NA	NA	NA	NA	NA	NA	NA	NA	NA	NA	NA	NA	NA	NA	NA	NA	NA	NA	NA	NA	NA	NA	TRB	HomoSapiens	NLVPMVATV	pp65	CMV	0	TRBV9	TRBJ1-1	4	8	HLA-A*02	B2M	MHCI	PMID:28423320	0	HomoSapiens	TRB
544	CASSETGGTEAFF	NA	1	1	NA	NA	NA	NA	NA	NA	NA	NA	NA	NA	NA	NA	NA	NA	NA	NA	NA	NA	NA	NA	NA	NA	NA	NA	NA	NA	NA	NA	TRB	HomoSapiens	NLVPMVATV	pp65	CMV	0	TRBV9	TRBJ1-1	4	8	HLA-A*02	B2M	MHCI	PMID:28423320	0	HomoSapiens	TRB
545	CASSFDRDYNSPLHF	NA	1	NA	NA	NA	NA	NA	NA	NA	NA	NA	NA	NA	NA	NA	NA	NA	NA	NA	NA	NA	NA	NA	NA	NA	NA	NA	NA	NA	NA	NA	NA	NA	NA	NA	NA	NA	NA	NA	NA	NA	NA	NA	NA	NA	NA	NA	NA
546	CASSFGANTEAFF	NA	1	1	NA	NA	NA	NA	NA	NA	NA	NA	NA	NA	NA	NA	NA	NA	NA	NA	NA	NA	NA	NA	NA	NA	NA	NA	NA	NA	NA	NA	TRB	HomoSapiens	KLGGALQAK	IE1	CMV	10365	TRBV5-1	TRBJ1-1	4	7	HLA-A*03:01	B2M	MHCI	https://www.10xgenomics.com/resources/application-notes/a-new-way-of-exploring-immunity-linking-highly-multiplexed-antigen-recognition-to-immune-repertoire-and-phenotype/#	0	HomoSapiens	TRB
547	CASSFGGGYGYTF	NA	1	NA	NA	NA	NA	NA	NA	NA	NA	NA	NA	NA	NA	NA	NA	NA	NA	NA	NA	NA	NA	NA	NA	NA	NA	NA	NA	NA	NA	NA	NA	NA	NA	NA	NA	NA	NA	NA	NA	NA	NA	NA	NA	NA	NA	NA	NA
548	CASSFSSYEQYF	NA	NA	1	NA	NA	NA	NA	NA	NA	NA	NA	NA	NA	NA	NA	NA	NA	NA	NA	NA	NA	NA	NA	NA	NA	NA	NA	NA	NA	NA	NA	TRB	HomoSapiens	GILGFVFTL	M	InfluenzaA	0	TRBV5-6	TRBJ2-7	4	6	HLA-A*02	B2M	MHCI	PMID:28423320	0	HomoSapiens	TRB
549	CASSGRNYGYTF	NA	1	1	NA	NA	NA	NA	NA	NA	NA	NA	NA	NA	NA	NA	NA	NA	NA	NA	NA	NA	NA	NA	NA	NA	NA	NA	NA	NA	NA	NA	TRB	HomoSapiens	KAFSPEVIPMF	Gag	HIV-1	0	TRBV19	TRBJ1-2	4	7	HLA-B*57:01	B2M	MHCI	PMID:17121793	1	HomoSapiens	TRB
550	CASSGRSTGELFF	NA	NA	1	NA	NA	NA	NA	NA	NA	NA	NA	NA	NA	NA	NA	NA	NA	NA	NA	NA	NA	NA	NA	NA	NA	NA	NA	NA	NA	NA	NA	TRB	HomoSapiens	GILGFVFTL	M	InfluenzaA	3.83E+45	TRBV19	TRBJ2-2	4	7	HLA-A*02:01	B2M	MHCI	PMID:27645996,https://www.10xgenomics.com/resources/application-notes/a-new-way-of-exploring-immunity-linking-highly-multiplexed-antigen-recognition-to-immune-repertoire-and-phenotype/#	1	HomoSapiens	TRB
551	CASSKEGNQPQHF	NA	NA	1	NA	NA	NA	NA	NA	NA	NA	NA	NA	NA	NA	NA	NA	NA	NA	NA	NA	NA	NA	NA	NA	NA	NA	NA	NA	NA	NA	NA	TRB	HomoSapiens	KLGGALQAK	IE1	CMV	18153	TRBV7-9	TRBJ1-5	4	7	HLA-A*03:01	B2M	MHCI	https://www.10xgenomics.com/resources/application-notes/a-new-way-of-exploring-immunity-linking-highly-multiplexed-antigen-recognition-to-immune-repertoire-and-phenotype/#	0	HomoSapiens	TRB
552	CASSKGTEAFF	NA	NA	1	NA	NA	NA	NA	NA	NA	NA	NA	NA	NA	NA	NA	NA	NA	NA	NA	NA	NA	NA	NA	NA	NA	NA	NA	NA	NA	NA	NA	TRB	HomoSapiens	KLGGALQAK	IE1	CMV	13891	TRBV5-1	TRBJ1-1	4	6	HLA-A*03:01	B2M	MHCI	https://www.10xgenomics.com/resources/application-notes/a-new-way-of-exploring-immunity-linking-highly-multiplexed-antigen-recognition-to-immune-repertoire-and-phenotype/#	0	HomoSapiens	TRB
553	CASSKQETQYF	NA	1	NA	NA	NA	NA	NA	NA	NA	NA	NA	NA	NA	NA	NA	NA	NA	NA	NA	NA	NA	NA	NA	NA	NA	NA	NA	NA	NA	NA	NA	NA	NA	NA	NA	NA	NA	NA	NA	NA	NA	NA	NA	NA	NA	NA	NA	NA
554	CASSLADTQYF	NA	1	NA	NA	NA	NA	NA	NA	NA	NA	NA	NA	NA	NA	NA	NA	NA	NA	NA	NA	NA	NA	NA	NA	NA	NA	NA	NA	NA	NA	NA	NA	NA	NA	NA	NA	NA	NA	NA	NA	NA	NA	NA	NA	NA	NA	NA	NA
555	CASSLAESSYNEQFF	NA	NA	1	NA	NA	NA	NA	NA	NA	NA	NA	NA	NA	NA	NA	NA	NA	NA	NA	NA	NA	NA	NA	NA	NA	NA	NA	NA	NA	NA	NA	TRB	HomoSapiens	KLGGALQAK	IE1	CMV	8821	TRBV5-1	TRBJ2-1	5	8	HLA-A*03:01	B2M	MHCI	https://www.10xgenomics.com/resources/application-notes/a-new-way-of-exploring-immunity-linking-highly-multiplexed-antigen-recognition-to-immune-repertoire-and-phenotype/#	0	HomoSapiens	TRB
556	CASSLAETQYF	NA	NA	1	NA	NA	NA	NA	NA	NA	NA	NA	NA	NA	NA	NA	NA	NA	NA	NA	NA	NA	NA	NA	NA	NA	NA	NA	NA	NA	NA	NA	TRB	HomoSapiens	KLGGALQAK	IE1	CMV	17418	TRBV5-4	TRBJ2-5	5	6	HLA-A*03:01	B2M	MHCI	https://www.10xgenomics.com/resources/application-notes/a-new-way-of-exploring-immunity-linking-highly-multiplexed-antigen-recognition-to-immune-repertoire-and-phenotype/#	0	HomoSapiens	TRB
557	CASSLAGAGELFF	NA	1	NA	NA	NA	NA	NA	NA	NA	NA	NA	NA	NA	NA	NA	NA	NA	NA	NA	NA	NA	NA	NA	NA	NA	NA	NA	NA	NA	NA	NA	NA	NA	NA	NA	NA	NA	NA	NA	NA	NA	NA	NA	NA	NA	NA	NA	NA
558	CASSLAGGDSYEQYF	NA	1	NA	NA	NA	NA	NA	NA	NA	NA	NA	NA	NA	NA	NA	NA	NA	NA	NA	NA	NA	NA	NA	NA	NA	NA	NA	NA	NA	NA	NA	NA	NA	NA	NA	NA	NA	NA	NA	NA	NA	NA	NA	NA	NA	NA	NA	NA
559	CASSLAGGGTEAFF	NA	1	NA	NA	NA	NA	NA	NA	NA	NA	NA	NA	NA	NA	NA	NA	NA	NA	NA	NA	NA	NA	NA	NA	NA	NA	NA	NA	NA	NA	NA	NA	NA	NA	NA	NA	NA	NA	NA	NA	NA	NA	NA	NA	NA	NA	NA	NA
560	CASSLAGGNQPQHF	NA	NA	1	NA	NA	NA	NA	NA	NA	NA	NA	NA	NA	NA	NA	NA	NA	NA	NA	NA	NA	NA	NA	NA	NA	NA	NA	NA	NA	NA	NA	TRB	HomoSapiens	KLGGALQAK	IE1	CMV	11300	TRBV7-9	TRBJ1-5	5	8	HLA-A*03:01	B2M	MHCI	https://www.10xgenomics.com/resources/application-notes/a-new-way-of-exploring-immunity-linking-highly-multiplexed-antigen-recognition-to-immune-repertoire-and-phenotype/#	0	HomoSapiens	TRB
561	CASSLAGNEQFF	NA	1	NA	NA	NA	NA	NA	NA	NA	NA	NA	NA	NA	NA	NA	NA	NA	NA	NA	NA	NA	NA	NA	NA	NA	NA	NA	NA	NA	NA	NA	NA	NA	NA	NA	NA	NA	NA	NA	NA	NA	NA	NA	NA	NA	NA	NA	NA
562	CASSLAGTGELFF	NA	NA	1	NA	NA	NA	NA	NA	NA	NA	NA	NA	NA	NA	NA	NA	NA	NA	NA	NA	NA	NA	NA	NA	NA	NA	NA	NA	NA	NA	NA	TRB	HomoSapiens	RLRAEAQVK	EBNA3A	EBV	19249	TRBV7-9	TRBJ2-2	5	7	HLA-A*03:01	B2M	MHCI	https://www.10xgenomics.com/resources/application-notes/a-new-way-of-exploring-immunity-linking-highly-multiplexed-antigen-recognition-to-immune-repertoire-and-phenotype/#	0	HomoSapiens	TRB
563	CASSLAGTGELFF	NA	NA	1	NA	NA	NA	NA	NA	NA	NA	NA	NA	NA	NA	NA	NA	NA	NA	NA	NA	NA	NA	NA	NA	NA	NA	NA	NA	NA	NA	NA	TRB	HomoSapiens	IVTDFSVIK	EBNA4	EBV	2529	TRBV5-6	TRBJ2-2	5	7	HLA-A*11:01	B2M	MHCI	https://www.10xgenomics.com/resources/application-notes/a-new-way-of-exploring-immunity-linking-highly-multiplexed-antigen-recognition-to-immune-repertoire-and-phenotype/#	0	HomoSapiens	TRB
564	CASSLDLGSTEAFF	NA	1	1	NA	NA	NA	NA	NA	NA	NA	NA	NA	NA	NA	NA	NA	NA	NA	NA	NA	NA	NA	NA	NA	NA	NA	NA	NA	NA	NA	NA	TRB	HomoSapiens	IPSINVHHY	pp65	CMV	0	TRBV11-3	TRBJ1-1	5	9	HLA-B*35:01	B2M	MHCI	PMID:23028307	1	HomoSapiens	TRB
565	CASSLDSAYEQYF	NA	NA	1	NA	NA	NA	NA	NA	NA	NA	NA	NA	NA	NA	NA	NA	NA	NA	NA	NA	NA	NA	NA	NA	NA	NA	NA	NA	NA	NA	NA	TRB	HomoSapiens	KLGGALQAK	IE1	CMV	1700720479	TRBV11-2,TRBV7-2	TRBJ2-7	5	8	HLA-A*03:01	B2M	MHCI	https://www.10xgenomics.com/resources/application-notes/a-new-way-of-exploring-immunity-linking-highly-multiplexed-antigen-recognition-to-immune-repertoire-and-phenotype/#	0	HomoSapiens	TRB
566	CASSLEAGAYEQYF	NA	1	1	NA	NA	NA	NA	NA	NA	NA	NA	NA	NA	NA	NA	NA	NA	NA	NA	NA	NA	NA	NA	NA	NA	NA	NA	NA	NA	NA	NA	TRB	HomoSapiens	NLVPMVATV	pp65	CMV	0	TRBV7-8	TRBJ2-7	5	9	HLA-A*02	B2M	MHCI	PMID:28423320	0	HomoSapiens	TRB
567	CASSLEAGAYEQYF	NA	1	1	NA	NA	NA	NA	NA	NA	NA	NA	NA	NA	NA	NA	NA	NA	NA	NA	NA	NA	NA	NA	NA	NA	NA	NA	NA	NA	NA	NA	TRB	HomoSapiens	NLVPMVATV	pp65	CMV	0	TRBV7-8	TRBJ2-7	5	9	HLA-A*02	B2M	MHCI	PMID:28423320	0	HomoSapiens	TRB
568	CASSLEANYGYTF	NA	1	NA	NA	NA	NA	NA	NA	NA	NA	NA	NA	NA	NA	NA	NA	NA	NA	NA	NA	NA	NA	NA	NA	NA	NA	NA	NA	NA	NA	NA	NA	NA	NA	NA	NA	NA	NA	NA	NA	NA	NA	NA	NA	NA	NA	NA	NA
569	CASSLEGQASSYEQYF	NA	NA	1	NA	NA	NA	NA	NA	NA	NA	NA	NA	NA	NA	NA	NA	NA	NA	NA	NA	NA	NA	NA	NA	NA	NA	NA	NA	NA	NA	NA	TRB	HomoSapiens	GLCTLVAML	BMLF1	EBV	0	TRBV5-1	TRBJ2-7	5	10	HLA-A*02	B2M	MHCI	https://github.com/antigenomics/vdjdb-db/issues/288	0	HomoSapiens	TRB
570	CASSLEGQGTYEQYF	NA	1	NA	NA	NA	NA	NA	NA	NA	NA	NA	NA	NA	NA	NA	NA	NA	NA	NA	NA	NA	NA	NA	NA	NA	NA	NA	NA	NA	NA	NA	NA	NA	NA	NA	NA	NA	NA	NA	NA	NA	NA	NA	NA	NA	NA	NA	NA
571	CASSLFGDTQYF	NA	1	NA	NA	NA	NA	NA	NA	NA	NA	NA	NA	NA	NA	NA	NA	NA	NA	NA	NA	NA	NA	NA	NA	NA	NA	NA	NA	NA	NA	NA	NA	NA	NA	NA	NA	NA	NA	NA	NA	NA	NA	NA	NA	NA	NA	NA	NA
572	CASSLGETQYF	NA	1	1	NA	NA	NA	NA	NA	NA	NA	NA	NA	NA	NA	NA	NA	NA	NA	NA	NA	NA	NA	NA	NA	NA	NA	NA	NA	NA	NA	NA	TRB	HomoSapiens	KLGGALQAK	IE1	CMV	10102	TRBV27	TRBJ2-5	5	6	HLA-A*03:01	B2M	MHCI	https://www.10xgenomics.com/resources/application-notes/a-new-way-of-exploring-immunity-linking-highly-multiplexed-antigen-recognition-to-immune-repertoire-and-phenotype/#	0	HomoSapiens	TRB
573	CASSLGETQYF	NA	1	1	NA	NA	NA	NA	NA	NA	NA	NA	NA	NA	NA	NA	NA	NA	NA	NA	NA	NA	NA	NA	NA	NA	NA	NA	NA	NA	NA	NA	TRB	HomoSapiens	KLGGALQAK	IE1	CMV	10102	TRBV27	TRBJ2-5	5	6	HLA-A*03:01	B2M	MHCI	https://www.10xgenomics.com/resources/application-notes/a-new-way-of-exploring-immunity-linking-highly-multiplexed-antigen-recognition-to-immune-repertoire-and-phenotype/#	0	HomoSapiens	TRB
574	CASSLGETQYF	NA	1	1	NA	NA	NA	NA	NA	NA	NA	NA	NA	NA	NA	NA	NA	NA	NA	NA	NA	NA	NA	NA	NA	NA	NA	NA	NA	NA	NA	NA	TRB	HomoSapiens	KLGGALQAK	IE1	CMV	10102	TRBV27	TRBJ2-5	5	6	HLA-A*03:01	B2M	MHCI	https://www.10xgenomics.com/resources/application-notes/a-new-way-of-exploring-immunity-linking-highly-multiplexed-antigen-recognition-to-immune-repertoire-and-phenotype/#	0	HomoSapiens	TRB
575	CASSLGETQYF	NA	1	1	NA	NA	NA	NA	NA	NA	NA	NA	NA	NA	NA	NA	NA	NA	NA	NA	NA	NA	NA	NA	NA	NA	NA	NA	NA	NA	NA	NA	TRB	HomoSapiens	NLSALGIFST	IGF2BP2	HomoSapiens	0	TRBV5-1	TRBJ2-5	5	6	HLA-A*02	B2M	MHCI	PMID:29483360	0	HomoSapiens	TRB
576	CASSLGETQYF	NA	1	1	NA	NA	NA	NA	NA	NA	NA	NA	NA	NA	NA	NA	NA	NA	NA	NA	NA	NA	NA	NA	NA	NA	NA	NA	NA	NA	NA	NA	TRB	HomoSapiens	NLSALGIFST	IGF2BP2	HomoSapiens	0	TRBV5-1	TRBJ2-5	5	6	HLA-A*02	B2M	MHCI	PMID:29483360	0	HomoSapiens	TRB
577	CASSLGETQYF	NA	1	1	NA	NA	NA	NA	NA	NA	NA	NA	NA	NA	NA	NA	NA	NA	NA	NA	NA	NA	NA	NA	NA	NA	NA	NA	NA	NA	NA	NA	TRB	HomoSapiens	NLSALGIFST	IGF2BP2	HomoSapiens	0	TRBV5-1	TRBJ2-5	5	6	HLA-A*02	B2M	MHCI	PMID:29483360	0	HomoSapiens	TRB
578	CASSLGETQYF	NA	1	1	NA	NA	NA	NA	NA	NA	NA	NA	NA	NA	NA	NA	NA	NA	NA	NA	NA	NA	NA	NA	NA	NA	NA	NA	NA	NA	NA	NA	TRB	HomoSapiens	ELAGIGILTV	MLANA	HomoSapiens	1031	TRBV27	TRBJ2-5	5	6	HLA-A*02:01	B2M	MHCI	https://www.10xgenomics.com/resources/application-notes/a-new-way-of-exploring-immunity-linking-highly-multiplexed-antigen-recognition-to-immune-repertoire-and-phenotype/#	0	HomoSapiens	TRB
579	CASSLGETQYF	NA	1	1	NA	NA	NA	NA	NA	NA	NA	NA	NA	NA	NA	NA	NA	NA	NA	NA	NA	NA	NA	NA	NA	NA	NA	NA	NA	NA	NA	NA	TRB	HomoSapiens	ELAGIGILTV	MLANA	HomoSapiens	1031	TRBV27	TRBJ2-5	5	6	HLA-A*02:01	B2M	MHCI	https://www.10xgenomics.com/resources/application-notes/a-new-way-of-exploring-immunity-linking-highly-multiplexed-antigen-recognition-to-immune-repertoire-and-phenotype/#	0	HomoSapiens	TRB
580	CASSLGETQYF	NA	1	1	NA	NA	NA	NA	NA	NA	NA	NA	NA	NA	NA	NA	NA	NA	NA	NA	NA	NA	NA	NA	NA	NA	NA	NA	NA	NA	NA	NA	TRB	HomoSapiens	ELAGIGILTV	MLANA	HomoSapiens	1031	TRBV27	TRBJ2-5	5	6	HLA-A*02:01	B2M	MHCI	https://www.10xgenomics.com/resources/application-notes/a-new-way-of-exploring-immunity-linking-highly-multiplexed-antigen-recognition-to-immune-repertoire-and-phenotype/#	0	HomoSapiens	TRB
581	CASSLGETQYF	NA	1	1	NA	NA	NA	NA	NA	NA	NA	NA	NA	NA	NA	NA	NA	NA	NA	NA	NA	NA	NA	NA	NA	NA	NA	NA	NA	NA	NA	NA	TRB	HomoSapiens	NLVPMVATV	pp65	CMV	0	TRBV11-2	TRBJ2-5	5	6	HLA-A*02	B2M	MHCI	PMID:28423320	0	HomoSapiens	TRB
582	CASSLGETQYF	NA	1	1	NA	NA	NA	NA	NA	NA	NA	NA	NA	NA	NA	NA	NA	NA	NA	NA	NA	NA	NA	NA	NA	NA	NA	NA	NA	NA	NA	NA	TRB	HomoSapiens	NLVPMVATV	pp65	CMV	0	TRBV11-2	TRBJ2-5	5	6	HLA-A*02	B2M	MHCI	PMID:28423320	0	HomoSapiens	TRB
583	CASSLGETQYF	NA	1	1	NA	NA	NA	NA	NA	NA	NA	NA	NA	NA	NA	NA	NA	NA	NA	NA	NA	NA	NA	NA	NA	NA	NA	NA	NA	NA	NA	NA	TRB	HomoSapiens	NLVPMVATV	pp65	CMV	0	TRBV11-2	TRBJ2-5	5	6	HLA-A*02	B2M	MHCI	PMID:28423320	0	HomoSapiens	TRB
584	CASSLGGEKLFF	NA	NA	1	NA	NA	NA	NA	NA	NA	NA	NA	NA	NA	NA	NA	NA	NA	NA	NA	NA	NA	NA	NA	NA	NA	NA	NA	NA	NA	NA	NA	TRB	HomoSapiens	KLGGALQAK	IE1	CMV	13290	TRBV7-9	TRBJ1-4	5	7	HLA-A*03:01	B2M	MHCI	https://www.10xgenomics.com/resources/application-notes/a-new-way-of-exploring-immunity-linking-highly-multiplexed-antigen-recognition-to-immune-repertoire-and-phenotype/#	0	HomoSapiens	TRB
585	CASSLGGELFF	NA	1	1	NA	NA	NA	NA	NA	NA	NA	NA	NA	NA	NA	NA	NA	NA	NA	NA	NA	NA	NA	NA	NA	NA	NA	NA	NA	NA	NA	NA	TRB	HomoSapiens	ELAGIGILTV	MLANA	HomoSapiens	0	TRBV7-9	TRBJ2-2	5	6	HLA-A*02	B2M	MHCI	https://github.com/antigenomics/vdjdb-db/issues/193	0	HomoSapiens	TRB
586	CASSLGGNQPQHF	NA	1	NA	NA	NA	NA	NA	NA	NA	NA	NA	NA	NA	NA	NA	NA	NA	NA	NA	NA	NA	NA	NA	NA	NA	NA	NA	NA	NA	NA	NA	NA	NA	NA	NA	NA	NA	NA	NA	NA	NA	NA	NA	NA	NA	NA	NA	NA
587	CASSLGGNQPQHF	NA	1	NA	NA	NA	NA	NA	NA	NA	NA	NA	NA	NA	NA	NA	NA	NA	NA	NA	NA	NA	NA	NA	NA	NA	NA	NA	NA	NA	NA	NA	NA	NA	NA	NA	NA	NA	NA	NA	NA	NA	NA	NA	NA	NA	NA	NA	NA
588	CASSLGGNQPQHF	NA	1	NA	NA	NA	NA	NA	NA	NA	NA	NA	NA	NA	NA	NA	NA	NA	NA	NA	NA	NA	NA	NA	NA	NA	NA	NA	NA	NA	NA	NA	NA	NA	NA	NA	NA	NA	NA	NA	NA	NA	NA	NA	NA	NA	NA	NA	NA
589	CASSLGGNQPQHF	NA	1	NA	NA	NA	NA	NA	NA	NA	NA	NA	NA	NA	NA	NA	NA	NA	NA	NA	NA	NA	NA	NA	NA	NA	NA	NA	NA	NA	NA	NA	NA	NA	NA	NA	NA	NA	NA	NA	NA	NA	NA	NA	NA	NA	NA	NA	NA
590	CASSLGGNQPQHF	NA	1	NA	NA	NA	NA	NA	NA	NA	NA	NA	NA	NA	NA	NA	NA	NA	NA	NA	NA	NA	NA	NA	NA	NA	NA	NA	NA	NA	NA	NA	NA	NA	NA	NA	NA	NA	NA	NA	NA	NA	NA	NA	NA	NA	NA	NA	NA
591	CASSLGGNQPQHF	NA	1	NA	NA	NA	NA	NA	NA	NA	NA	NA	NA	NA	NA	NA	NA	NA	NA	NA	NA	NA	NA	NA	NA	NA	NA	NA	NA	NA	NA	NA	NA	NA	NA	NA	NA	NA	NA	NA	NA	NA	NA	NA	NA	NA	NA	NA	NA
592	CASSLGGNQPQHF	NA	1	NA	NA	NA	NA	NA	NA	NA	NA	NA	NA	NA	NA	NA	NA	NA	NA	NA	NA	NA	NA	NA	NA	NA	NA	NA	NA	NA	NA	NA	NA	NA	NA	NA	NA	NA	NA	NA	NA	NA	NA	NA	NA	NA	NA	NA	NA
593	CASSLGGNQPQHF	NA	1	NA	NA	NA	NA	NA	NA	NA	NA	NA	NA	NA	NA	NA	NA	NA	NA	NA	NA	NA	NA	NA	NA	NA	NA	NA	NA	NA	NA	NA	NA	NA	NA	NA	NA	NA	NA	NA	NA	NA	NA	NA	NA	NA	NA	NA	NA
594	CASSLGGNQPQHF	NA	1	NA	NA	NA	NA	NA	NA	NA	NA	NA	NA	NA	NA	NA	NA	NA	NA	NA	NA	NA	NA	NA	NA	NA	NA	NA	NA	NA	NA	NA	NA	NA	NA	NA	NA	NA	NA	NA	NA	NA	NA	NA	NA	NA	NA	NA	NA
595	CASSLGGNQPQHF	NA	1	NA	NA	NA	NA	NA	NA	NA	NA	NA	NA	NA	NA	NA	NA	NA	NA	NA	NA	NA	NA	NA	NA	NA	NA	NA	NA	NA	NA	NA	NA	NA	NA	NA	NA	NA	NA	NA	NA	NA	NA	NA	NA	NA	NA	NA	NA
596	CASSLGGNQPQHF	NA	1	NA	NA	NA	NA	NA	NA	NA	NA	NA	NA	NA	NA	NA	NA	NA	NA	NA	NA	NA	NA	NA	NA	NA	NA	NA	NA	NA	NA	NA	NA	NA	NA	NA	NA	NA	NA	NA	NA	NA	NA	NA	NA	NA	NA	NA	NA
597	CASSLGGNQPQHF	NA	1	NA	NA	NA	NA	NA	NA	NA	NA	NA	NA	NA	NA	NA	NA	NA	NA	NA	NA	NA	NA	NA	NA	NA	NA	NA	NA	NA	NA	NA	NA	NA	NA	NA	NA	NA	NA	NA	NA	NA	NA	NA	NA	NA	NA	NA	NA
598	CASSLGGNQPQHF	NA	1	NA	NA	NA	NA	NA	NA	NA	NA	NA	NA	NA	NA	NA	NA	NA	NA	NA	NA	NA	NA	NA	NA	NA	NA	NA	NA	NA	NA	NA	NA	NA	NA	NA	NA	NA	NA	NA	NA	NA	NA	NA	NA	NA	NA	NA	NA
599	CASSLGGNQPQHF	NA	1	NA	NA	NA	NA	NA	NA	NA	NA	NA	NA	NA	NA	NA	NA	NA	NA	NA	NA	NA	NA	NA	NA	NA	NA	NA	NA	NA	NA	NA	NA	NA	NA	NA	NA	NA	NA	NA	NA	NA	NA	NA	NA	NA	NA	NA	NA
600	CASSLGGNQPQHF	NA	1	NA	NA	NA	NA	NA	NA	NA	NA	NA	NA	NA	NA	NA	NA	NA	NA	NA	NA	NA	NA	NA	NA	NA	NA	NA	NA	NA	NA	NA	NA	NA	NA	NA	NA	NA	NA	NA	NA	NA	NA	NA	NA	NA	NA	NA	NA
601	CASSLGGNQPQHF	NA	1	NA	NA	NA	NA	NA	NA	NA	NA	NA	NA	NA	NA	NA	NA	NA	NA	NA	NA	NA	NA	NA	NA	NA	NA	NA	NA	NA	NA	NA	NA	NA	NA	NA	NA	NA	NA	NA	NA	NA	NA	NA	NA	NA	NA	NA	NA
602	CASSLGGNQPQHF	NA	1	NA	NA	NA	NA	NA	NA	NA	NA	NA	NA	NA	NA	NA	NA	NA	NA	NA	NA	NA	NA	NA	NA	NA	NA	NA	NA	NA	NA	NA	NA	NA	NA	NA	NA	NA	NA	NA	NA	NA	NA	NA	NA	NA	NA	NA	NA
603	CASSLGGNQPQHF	NA	1	NA	NA	NA	NA	NA	NA	NA	NA	NA	NA	NA	NA	NA	NA	NA	NA	NA	NA	NA	NA	NA	NA	NA	NA	NA	NA	NA	NA	NA	NA	NA	NA	NA	NA	NA	NA	NA	NA	NA	NA	NA	NA	NA	NA	NA	NA
604	CASSLGGNQPQHF	NA	1	NA	NA	NA	NA	NA	NA	NA	NA	NA	NA	NA	NA	NA	NA	NA	NA	NA	NA	NA	NA	NA	NA	NA	NA	NA	NA	NA	NA	NA	NA	NA	NA	NA	NA	NA	NA	NA	NA	NA	NA	NA	NA	NA	NA	NA	NA
605	CASSLGGNQPQHF	NA	1	NA	NA	NA	NA	NA	NA	NA	NA	NA	NA	NA	NA	NA	NA	NA	NA	NA	NA	NA	NA	NA	NA	NA	NA	NA	NA	NA	NA	NA	NA	NA	NA	NA	NA	NA	NA	NA	NA	NA	NA	NA	NA	NA	NA	NA	NA
606	CASSLGGNQPQHF	NA	1	NA	NA	NA	NA	NA	NA	NA	NA	NA	NA	NA	NA	NA	NA	NA	NA	NA	NA	NA	NA	NA	NA	NA	NA	NA	NA	NA	NA	NA	NA	NA	NA	NA	NA	NA	NA	NA	NA	NA	NA	NA	NA	NA	NA	NA	NA
607	CASSLGGNQPQHF	NA	1	NA	NA	NA	NA	NA	NA	NA	NA	NA	NA	NA	NA	NA	NA	NA	NA	NA	NA	NA	NA	NA	NA	NA	NA	NA	NA	NA	NA	NA	NA	NA	NA	NA	NA	NA	NA	NA	NA	NA	NA	NA	NA	NA	NA	NA	NA
608	CASSLGGNQPQHF	NA	1	NA	NA	NA	NA	NA	NA	NA	NA	NA	NA	NA	NA	NA	NA	NA	NA	NA	NA	NA	NA	NA	NA	NA	NA	NA	NA	NA	NA	NA	NA	NA	NA	NA	NA	NA	NA	NA	NA	NA	NA	NA	NA	NA	NA	NA	NA
609	CASSLGGNQPQHF	NA	1	NA	NA	NA	NA	NA	NA	NA	NA	NA	NA	NA	NA	NA	NA	NA	NA	NA	NA	NA	NA	NA	NA	NA	NA	NA	NA	NA	NA	NA	NA	NA	NA	NA	NA	NA	NA	NA	NA	NA	NA	NA	NA	NA	NA	NA	NA
610	CASSLGGNQPQHF	NA	1	NA	NA	NA	NA	NA	NA	NA	NA	NA	NA	NA	NA	NA	NA	NA	NA	NA	NA	NA	NA	NA	NA	NA	NA	NA	NA	NA	NA	NA	NA	NA	NA	NA	NA	NA	NA	NA	NA	NA	NA	NA	NA	NA	NA	NA	NA
611	CASSLGGNQPQHF	NA	1	NA	NA	NA	NA	NA	NA	NA	NA	NA	NA	NA	NA	NA	NA	NA	NA	NA	NA	NA	NA	NA	NA	NA	NA	NA	NA	NA	NA	NA	NA	NA	NA	NA	NA	NA	NA	NA	NA	NA	NA	NA	NA	NA	NA	NA	NA
612	CASSLGGQGAYEQYF	NA	1	NA	NA	NA	NA	NA	NA	NA	NA	NA	NA	NA	NA	NA	NA	NA	NA	NA	NA	NA	NA	NA	NA	NA	NA	NA	NA	NA	NA	NA	NA	NA	NA	NA	NA	NA	NA	NA	NA	NA	NA	NA	NA	NA	NA	NA	NA
613	CASSLGGRNTEAFF	NA	NA	1	NA	NA	NA	NA	NA	NA	NA	NA	NA	NA	NA	NA	NA	NA	NA	NA	NA	NA	NA	NA	NA	NA	NA	NA	NA	NA	NA	NA	TRB	HomoSapiens	KLGGALQAK	IE1	CMV	3281	TRBV7-9	TRBJ1-1	5	8	HLA-A*03:01	B2M	MHCI	https://www.10xgenomics.com/resources/application-notes/a-new-way-of-exploring-immunity-linking-highly-multiplexed-antigen-recognition-to-immune-repertoire-and-phenotype/#	0	HomoSapiens	TRB
614	CASSLGGSNYEQYF	NA	NA	1	NA	NA	NA	NA	NA	NA	NA	NA	NA	NA	NA	NA	NA	NA	NA	NA	NA	NA	NA	NA	NA	NA	NA	NA	NA	NA	NA	NA	TRB	HomoSapiens	ELAGIGILTV	MLANA	HomoSapiens	24239	TRBV27	TRBJ2-7	5	9	HLA-A*02	B2M	MHCI	PMID:12555663	0	HomoSapiens	TRB
615	CASSLGGSSYEQYF	NA	1	NA	NA	NA	NA	NA	NA	NA	NA	NA	NA	NA	NA	NA	NA	NA	NA	NA	NA	NA	NA	NA	NA	NA	NA	NA	NA	NA	NA	NA	NA	NA	NA	NA	NA	NA	NA	NA	NA	NA	NA	NA	NA	NA	NA	NA	NA
616	CASSLGGSSYEQYF	NA	1	NA	NA	NA	NA	NA	NA	NA	NA	NA	NA	NA	NA	NA	NA	NA	NA	NA	NA	NA	NA	NA	NA	NA	NA	NA	NA	NA	NA	NA	NA	NA	NA	NA	NA	NA	NA	NA	NA	NA	NA	NA	NA	NA	NA	NA	NA
617	CASSLGMNQPQHF	NA	1	NA	NA	NA	NA	NA	NA	NA	NA	NA	NA	NA	NA	NA	NA	NA	NA	NA	NA	NA	NA	NA	NA	NA	NA	NA	NA	NA	NA	NA	NA	NA	NA	NA	NA	NA	NA	NA	NA	NA	NA	NA	NA	NA	NA	NA	NA
618	CASSLGPGRYNEQFF	NA	1	NA	NA	NA	NA	NA	NA	NA	NA	NA	NA	NA	NA	NA	NA	NA	NA	NA	NA	NA	NA	NA	NA	NA	NA	NA	NA	NA	NA	NA	NA	NA	NA	NA	NA	NA	NA	NA	NA	NA	NA	NA	NA	NA	NA	NA	NA
619	CASSLGQGNTEAFF	NA	1	1	NA	NA	NA	NA	NA	NA	NA	NA	NA	NA	NA	NA	NA	NA	NA	NA	NA	NA	NA	NA	NA	NA	NA	NA	NA	NA	NA	NA	TRB	HomoSapiens	NLVPMVATV	pp65	CMV	0	TRBV6-2	TRBJ1-1	4	8	HLA-A*02	B2M	MHCI	PMID:28423320	0	HomoSapiens	TRB
620	CASSLGQGNTEAFF	NA	1	1	NA	NA	NA	NA	NA	NA	NA	NA	NA	NA	NA	NA	NA	NA	NA	NA	NA	NA	NA	NA	NA	NA	NA	NA	NA	NA	NA	NA	TRB	HomoSapiens	NLVPMVATV	pp65	CMV	0	TRBV6-2	TRBJ1-1	4	8	HLA-A*02	B2M	MHCI	PMID:28423320	0	HomoSapiens	TRB
621	CASSLGQGNTEAFF	NA	1	1	NA	NA	NA	NA	NA	NA	NA	NA	NA	NA	NA	NA	NA	NA	NA	NA	NA	NA	NA	NA	NA	NA	NA	NA	NA	NA	NA	NA	TRB	HomoSapiens	NLVPMVATV	pp65	CMV	0	TRBV6-2	TRBJ1-1	4	8	HLA-A*02	B2M	MHCI	PMID:28423320	0	HomoSapiens	TRB
622	CASSLGQGNTEAFF	NA	1	1	NA	NA	NA	NA	NA	NA	NA	NA	NA	NA	NA	NA	NA	NA	NA	NA	NA	NA	NA	NA	NA	NA	NA	NA	NA	NA	NA	NA	TRB	HomoSapiens	NLVPMVATV	pp65	CMV	0	TRBV6-2	TRBJ1-1	4	8	HLA-A*02	B2M	MHCI	PMID:28423320	0	HomoSapiens	TRB
623	CASSLGQGNTEAFF	NA	1	1	NA	NA	NA	NA	NA	NA	NA	NA	NA	NA	NA	NA	NA	NA	NA	NA	NA	NA	NA	NA	NA	NA	NA	NA	NA	NA	NA	NA	TRB	HomoSapiens	LPRRSGAAGA	NP	InfluenzaA	0	TRBV7-3	TRBJ1-1	5	8	HLA-B*07:02	B2M	MHCI	PMID:28636589	0	HomoSapiens	TRB
624	CASSLGQGNTEAFF	NA	1	1	NA	NA	NA	NA	NA	NA	NA	NA	NA	NA	NA	NA	NA	NA	NA	NA	NA	NA	NA	NA	NA	NA	NA	NA	NA	NA	NA	NA	TRB	HomoSapiens	LPRRSGAAGA	NP	InfluenzaA	0	TRBV7-3	TRBJ1-1	5	8	HLA-B*07:02	B2M	MHCI	PMID:28636589	0	HomoSapiens	TRB
625	CASSLGQGNTEAFF	NA	1	1	NA	NA	NA	NA	NA	NA	NA	NA	NA	NA	NA	NA	NA	NA	NA	NA	NA	NA	NA	NA	NA	NA	NA	NA	NA	NA	NA	NA	TRB	HomoSapiens	LPRRSGAAGA	NP	InfluenzaA	0	TRBV7-3	TRBJ1-1	5	8	HLA-B*07:02	B2M	MHCI	PMID:28636589	0	HomoSapiens	TRB
626	CASSLGQGNTEAFF	NA	1	1	NA	NA	NA	NA	NA	NA	NA	NA	NA	NA	NA	NA	NA	NA	NA	NA	NA	NA	NA	NA	NA	NA	NA	NA	NA	NA	NA	NA	TRB	HomoSapiens	LPRRSGAAGA	NP	InfluenzaA	0	TRBV7-3	TRBJ1-1	5	8	HLA-B*07:02	B2M	MHCI	PMID:28636589	0	HomoSapiens	TRB
627	CASSLGQGNTEAFF	NA	1	1	NA	NA	NA	NA	NA	NA	NA	NA	NA	NA	NA	NA	NA	NA	NA	NA	NA	NA	NA	NA	NA	NA	NA	NA	NA	NA	NA	NA	TRB	HomoSapiens	KLGGALQAK	IE1	CMV	20031	TRBV27	TRBJ1-1	5	8	HLA-A*03:01	B2M	MHCI	https://www.10xgenomics.com/resources/application-notes/a-new-way-of-exploring-immunity-linking-highly-multiplexed-antigen-recognition-to-immune-repertoire-and-phenotype/#	0	HomoSapiens	TRB
628	CASSLGQGNTEAFF	NA	1	1	NA	NA	NA	NA	NA	NA	NA	NA	NA	NA	NA	NA	NA	NA	NA	NA	NA	NA	NA	NA	NA	NA	NA	NA	NA	NA	NA	NA	TRB	HomoSapiens	KLGGALQAK	IE1	CMV	20031	TRBV27	TRBJ1-1	5	8	HLA-A*03:01	B2M	MHCI	https://www.10xgenomics.com/resources/application-notes/a-new-way-of-exploring-immunity-linking-highly-multiplexed-antigen-recognition-to-immune-repertoire-and-phenotype/#	0	HomoSapiens	TRB
629	CASSLGQGNTEAFF	NA	1	1	NA	NA	NA	NA	NA	NA	NA	NA	NA	NA	NA	NA	NA	NA	NA	NA	NA	NA	NA	NA	NA	NA	NA	NA	NA	NA	NA	NA	TRB	HomoSapiens	KLGGALQAK	IE1	CMV	20031	TRBV27	TRBJ1-1	5	8	HLA-A*03:01	B2M	MHCI	https://www.10xgenomics.com/resources/application-notes/a-new-way-of-exploring-immunity-linking-highly-multiplexed-antigen-recognition-to-immune-repertoire-and-phenotype/#	0	HomoSapiens	TRB
630	CASSLGQGNTEAFF	NA	1	1	NA	NA	NA	NA	NA	NA	NA	NA	NA	NA	NA	NA	NA	NA	NA	NA	NA	NA	NA	NA	NA	NA	NA	NA	NA	NA	NA	NA	TRB	HomoSapiens	KLGGALQAK	IE1	CMV	20031	TRBV27	TRBJ1-1	5	8	HLA-A*03:01	B2M	MHCI	https://www.10xgenomics.com/resources/application-notes/a-new-way-of-exploring-immunity-linking-highly-multiplexed-antigen-recognition-to-immune-repertoire-and-phenotype/#	0	HomoSapiens	TRB
631	CASSLGQPNTGELFF	NA	1	NA	NA	NA	NA	NA	NA	NA	NA	NA	NA	NA	NA	NA	NA	NA	NA	NA	NA	NA	NA	NA	NA	NA	NA	NA	NA	NA	NA	NA	NA	NA	NA	NA	NA	NA	NA	NA	NA	NA	NA	NA	NA	NA	NA	NA	NA
632	CASSLGRETQYF	1	NA	1	NA	Human	Pathogens	Cytomegalovirus (CMV)	D003586	NA	1	Yes	IE-1	P03169	CRVLCCYVL	6954	HLA-C*07:02	PBMC	CD8	NA	NA	NA	NA	TRBV28	NA	TRBJ2-5	NA	NA	NA	30587531	NA	TRB	TRB	HomoSapiens	LPRRSGAAGA	NP	InfluenzaA	0	TRBV28	TRBJ2-5	5	7	HLA-B*07:02	B2M	MHCI	PMID:28636589	1	HomoSapiens	TRB
633	CASSLGTGGQETQYF	NA	1	NA	NA	NA	NA	NA	NA	NA	NA	NA	NA	NA	NA	NA	NA	NA	NA	NA	NA	NA	NA	NA	NA	NA	NA	NA	NA	NA	NA	NA	NA	NA	NA	NA	NA	NA	NA	NA	NA	NA	NA	NA	NA	NA	NA	NA	NA
634	CASSLGTSGNTIYF	NA	1	NA	NA	NA	NA	NA	NA	NA	NA	NA	NA	NA	NA	NA	NA	NA	NA	NA	NA	NA	NA	NA	NA	NA	NA	NA	NA	NA	NA	NA	NA	NA	NA	NA	NA	NA	NA	NA	NA	NA	NA	NA	NA	NA	NA	NA	NA
635	CASSLGTSNTEAFF	NA	1	NA	NA	NA	NA	NA	NA	NA	NA	NA	NA	NA	NA	NA	NA	NA	NA	NA	NA	NA	NA	NA	NA	NA	NA	NA	NA	NA	NA	NA	NA	NA	NA	NA	NA	NA	NA	NA	NA	NA	NA	NA	NA	NA	NA	NA	NA
636	CASSLLNTGELFF	NA	NA	1	NA	NA	NA	NA	NA	NA	NA	NA	NA	NA	NA	NA	NA	NA	NA	NA	NA	NA	NA	NA	NA	NA	NA	NA	NA	NA	NA	NA	TRB	HomoSapiens	KLGGALQAK	IE1	CMV	19205	TRBV7-6	TRBJ2-2	5	6	HLA-A*03:01	B2M	MHCI	https://www.10xgenomics.com/resources/application-notes/a-new-way-of-exploring-immunity-linking-highly-multiplexed-antigen-recognition-to-immune-repertoire-and-phenotype/#	0	HomoSapiens	TRB
637	CASSLPGNQPQHF	NA	NA	1	NA	NA	NA	NA	NA	NA	NA	NA	NA	NA	NA	NA	NA	NA	NA	NA	NA	NA	NA	NA	NA	NA	NA	NA	NA	NA	NA	NA	TRB	HomoSapiens	RLRAEAQVK	EBNA3A	EBV	20264	TRBV12-4	TRBJ1-5	5	7	HLA-A*03:01	B2M	MHCI	https://www.10xgenomics.com/resources/application-notes/a-new-way-of-exploring-immunity-linking-highly-multiplexed-antigen-recognition-to-immune-repertoire-and-phenotype/#	0	HomoSapiens	TRB
638	CASSLPGNQPQHF	NA	NA	1	NA	NA	NA	NA	NA	NA	NA	NA	NA	NA	NA	NA	NA	NA	NA	NA	NA	NA	NA	NA	NA	NA	NA	NA	NA	NA	NA	NA	TRB	HomoSapiens	KLGGALQAK	IE1	CMV	20263	TRBV12-4	TRBJ1-5	5	7	HLA-A*03:01	B2M	MHCI	https://www.10xgenomics.com/resources/application-notes/a-new-way-of-exploring-immunity-linking-highly-multiplexed-antigen-recognition-to-immune-repertoire-and-phenotype/#	0	HomoSapiens	TRB
639	CASSLQGANTEAFF	NA	1	NA	NA	NA	NA	NA	NA	NA	NA	NA	NA	NA	NA	NA	NA	NA	NA	NA	NA	NA	NA	NA	NA	NA	NA	NA	NA	NA	NA	NA	NA	NA	NA	NA	NA	NA	NA	NA	NA	NA	NA	NA	NA	NA	NA	NA	NA
640	CASSLQGGTGELFF	NA	NA	1	NA	NA	NA	NA	NA	NA	NA	NA	NA	NA	NA	NA	NA	NA	NA	NA	NA	NA	NA	NA	NA	NA	NA	NA	NA	NA	NA	NA	TRB	HomoSapiens	RAKFKQLL	BZLF1	EBV	66548705190	TRBV7-3	TRBJ2-2	5	8	HLA-B*08:01	B2M	MHCI	https://www.10xgenomics.com/resources/application-notes/a-new-way-of-exploring-immunity-linking-highly-multiplexed-antigen-recognition-to-immune-repertoire-and-phenotype/#	0	HomoSapiens	TRB
641	CASSLQGYEQYF	NA	1	NA	NA	NA	NA	NA	NA	NA	NA	NA	NA	NA	NA	NA	NA	NA	NA	NA	NA	NA	NA	NA	NA	NA	NA	NA	NA	NA	NA	NA	NA	NA	NA	NA	NA	NA	NA	NA	NA	NA	NA	NA	NA	NA	NA	NA	NA
642	CASSLQGYEQYF	NA	1	NA	NA	NA	NA	NA	NA	NA	NA	NA	NA	NA	NA	NA	NA	NA	NA	NA	NA	NA	NA	NA	NA	NA	NA	NA	NA	NA	NA	NA	NA	NA	NA	NA	NA	NA	NA	NA	NA	NA	NA	NA	NA	NA	NA	NA	NA
643	CASSLRNTEAFF	NA	NA	1	NA	NA	NA	NA	NA	NA	NA	NA	NA	NA	NA	NA	NA	NA	NA	NA	NA	NA	NA	NA	NA	NA	NA	NA	NA	NA	NA	NA	TRB	HomoSapiens	GLCTLVAML	BMLF1	EBV	0	TRBV12-3	TRBJ1-1	5	6	HLA-A*02	B2M	MHCI	PMID:29483360	0	HomoSapiens	TRB
644	CASSLRQGTEAFF	NA	1	NA	NA	NA	NA	NA	NA	NA	NA	NA	NA	NA	NA	NA	NA	NA	NA	NA	NA	NA	NA	NA	NA	NA	NA	NA	NA	NA	NA	NA	NA	NA	NA	NA	NA	NA	NA	NA	NA	NA	NA	NA	NA	NA	NA	NA	NA
645	CASSLRRNEQFF	NA	NA	1	NA	NA	NA	NA	NA	NA	NA	NA	NA	NA	NA	NA	NA	NA	NA	NA	NA	NA	NA	NA	NA	NA	NA	NA	NA	NA	NA	NA	TRB	HomoSapiens	AVFDRKSDAK	EBNA4	EBV	15630	TRBV27	TRBJ2-1	5	7	HLA-A*11:01	B2M	MHCI	https://www.10xgenomics.com/resources/application-notes/a-new-way-of-exploring-immunity-linking-highly-multiplexed-antigen-recognition-to-immune-repertoire-and-phenotype/#	0	HomoSapiens	TRB
646	CASSLSAYNEQFF	NA	NA	1	NA	NA	NA	NA	NA	NA	NA	NA	NA	NA	NA	NA	NA	NA	NA	NA	NA	NA	NA	NA	NA	NA	NA	NA	NA	NA	NA	NA	TRB	HomoSapiens	KLGGALQAK	IE1	CMV	12070	TRBV27	TRBJ2-1	5	7	HLA-A*03:01	B2M	MHCI	https://www.10xgenomics.com/resources/application-notes/a-new-way-of-exploring-immunity-linking-highly-multiplexed-antigen-recognition-to-immune-repertoire-and-phenotype/#	0	HomoSapiens	TRB
647	CASSLSGNEQYF	NA	NA	1	NA	NA	NA	NA	NA	NA	NA	NA	NA	NA	NA	NA	NA	NA	NA	NA	NA	NA	NA	NA	NA	NA	NA	NA	NA	NA	NA	NA	TRB	HomoSapiens	GLCTLVAML	BMLF1	EBV	0	TRBV12-3	TRBJ2-7	5	8	HLA-A*02:01	B2M	MHCI	PMID:28636589	0	HomoSapiens	TRB
648	CASSLSQNYGYTF	NA	1	NA	NA	NA	NA	NA	NA	NA	NA	NA	NA	NA	NA	NA	NA	NA	NA	NA	NA	NA	NA	NA	NA	NA	NA	NA	NA	NA	NA	NA	NA	NA	NA	NA	NA	NA	NA	NA	NA	NA	NA	NA	NA	NA	NA	NA	NA
649	CASSLSRGAYEQYF	1	1	1	NA	Human	Pathogens	Cytomegalovirus (CMV)	D003586	CMV	1	No	IE-1	P03169	QIKVRVKMV	NA	HLA-B*08:01	Lymph Nodes+PBMC	CD8	NA	NA	NA	NA	TRBV6-05	NA	TRBJ2-7	No	NA	NA	25339770	NA	TRB	TRB	HomoSapiens	QIKVRVKMV	IE1	CMV	0	TRBV6-5	TRBJ2-7	4	9	HLA-B*08:01	B2M	MHCI	PMID:25339770	1	HomoSapiens	TRB
650	CASSLSSYEQYF	NA	NA	1	NA	NA	NA	NA	NA	NA	NA	NA	NA	NA	NA	NA	NA	NA	NA	NA	NA	NA	NA	NA	NA	NA	NA	NA	NA	NA	NA	NA	TRB	HomoSapiens	KLGGALQAK	IE1	CMV	71257284	TRBV7-9	TRBJ2-7	5	6	HLA-A*03:01	B2M	MHCI	https://www.10xgenomics.com/resources/application-notes/a-new-way-of-exploring-immunity-linking-highly-multiplexed-antigen-recognition-to-immune-repertoire-and-phenotype/#	0	HomoSapiens	TRB
651	CASSLTGANVLTF	NA	1	1	NA	NA	NA	NA	NA	NA	NA	NA	NA	NA	NA	NA	NA	NA	NA	NA	NA	NA	NA	NA	NA	NA	NA	NA	NA	NA	NA	NA	TRB	HomoSapiens	NLVPMVATV	pp65	CMV	0	TRBV13	TRBJ2-6	5	6	HLA-A*02	B2M	MHCI	PMID:28423320	0	HomoSapiens	TRB
652	CASSLVGRETQYF	NA	1	NA	NA	NA	NA	NA	NA	NA	NA	NA	NA	NA	NA	NA	NA	NA	NA	NA	NA	NA	NA	NA	NA	NA	NA	NA	NA	NA	NA	NA	NA	NA	NA	NA	NA	NA	NA	NA	NA	NA	NA	NA	NA	NA	NA	NA	NA
653	CASSLVGRYEQYF	NA	1	NA	NA	NA	NA	NA	NA	NA	NA	NA	NA	NA	NA	NA	NA	NA	NA	NA	NA	NA	NA	NA	NA	NA	NA	NA	NA	NA	NA	NA	NA	NA	NA	NA	NA	NA	NA	NA	NA	NA	NA	NA	NA	NA	NA	NA	NA
654	CASSLVPGELFF	NA	1	NA	NA	NA	NA	NA	NA	NA	NA	NA	NA	NA	NA	NA	NA	NA	NA	NA	NA	NA	NA	NA	NA	NA	NA	NA	NA	NA	NA	NA	NA	NA	NA	NA	NA	NA	NA	NA	NA	NA	NA	NA	NA	NA	NA	NA	NA
655	CASSLYNEQFF	NA	1	1	NA	NA	NA	NA	NA	NA	NA	NA	NA	NA	NA	NA	NA	NA	NA	NA	NA	NA	NA	NA	NA	NA	NA	NA	NA	NA	NA	NA	TRB	HomoSapiens	NLVPMVATV	pp65	CMV	0	TRBV5-1	TRBJ2-1	5	5	HLA-A*02	B2M	MHCI	PMID:28423320	0	HomoSapiens	TRB
656	CASSLYNEQFF	NA	1	1	NA	NA	NA	NA	NA	NA	NA	NA	NA	NA	NA	NA	NA	NA	NA	NA	NA	NA	NA	NA	NA	NA	NA	NA	NA	NA	NA	NA	TRB	HomoSapiens	NLVPMVATV	pp65	CMV	0	TRBV5-1	TRBJ2-1	5	5	HLA-A*02	B2M	MHCI	PMID:28423320	0	HomoSapiens	TRB
657	CASSLYNEQFF	NA	1	1	NA	NA	NA	NA	NA	NA	NA	NA	NA	NA	NA	NA	NA	NA	NA	NA	NA	NA	NA	NA	NA	NA	NA	NA	NA	NA	NA	NA	TRB	HomoSapiens	NLVPMVATV	pp65	CMV	0	TRBV5-1	TRBJ2-1	5	5	HLA-A*02	B2M	MHCI	PMID:28423320	0	HomoSapiens	TRB
658	CASSPDGNYGYTF	NA	1	NA	NA	NA	NA	NA	NA	NA	NA	NA	NA	NA	NA	NA	NA	NA	NA	NA	NA	NA	NA	NA	NA	NA	NA	NA	NA	NA	NA	NA	NA	NA	NA	NA	NA	NA	NA	NA	NA	NA	NA	NA	NA	NA	NA	NA	NA
659	CASSPDSNYGYTF	NA	1	1	NA	NA	NA	NA	NA	NA	NA	NA	NA	NA	NA	NA	NA	NA	NA	NA	NA	NA	NA	NA	NA	NA	NA	NA	NA	NA	NA	NA	TRB	HomoSapiens	RLRAEAQVK	EBNA3A	EBV	3669	TRBV18	TRBJ1-2	5	7	HLA-A*03:01	B2M	MHCI	https://www.10xgenomics.com/resources/application-notes/a-new-way-of-exploring-immunity-linking-highly-multiplexed-antigen-recognition-to-immune-repertoire-and-phenotype/#	0	HomoSapiens	TRB
660	CASSPDSNYGYTF	NA	1	1	NA	NA	NA	NA	NA	NA	NA	NA	NA	NA	NA	NA	NA	NA	NA	NA	NA	NA	NA	NA	NA	NA	NA	NA	NA	NA	NA	NA	TRB	HomoSapiens	RLRAEAQVK	EBNA3A	EBV	3669	TRBV18	TRBJ1-2	5	7	HLA-A*03:01	B2M	MHCI	https://www.10xgenomics.com/resources/application-notes/a-new-way-of-exploring-immunity-linking-highly-multiplexed-antigen-recognition-to-immune-repertoire-and-phenotype/#	0	HomoSapiens	TRB
661	CASSPEETQYF	NA	1	NA	NA	NA	NA	NA	NA	NA	NA	NA	NA	NA	NA	NA	NA	NA	NA	NA	NA	NA	NA	NA	NA	NA	NA	NA	NA	NA	NA	NA	NA	NA	NA	NA	NA	NA	NA	NA	NA	NA	NA	NA	NA	NA	NA	NA	NA
662	CASSPGLLNTGELFF	NA	1	NA	NA	NA	NA	NA	NA	NA	NA	NA	NA	NA	NA	NA	NA	NA	NA	NA	NA	NA	NA	NA	NA	NA	NA	NA	NA	NA	NA	NA	NA	NA	NA	NA	NA	NA	NA	NA	NA	NA	NA	NA	NA	NA	NA	NA	NA
663	CASSPGQDYGYTF	NA	1	NA	NA	NA	NA	NA	NA	NA	NA	NA	NA	NA	NA	NA	NA	NA	NA	NA	NA	NA	NA	NA	NA	NA	NA	NA	NA	NA	NA	NA	NA	NA	NA	NA	NA	NA	NA	NA	NA	NA	NA	NA	NA	NA	NA	NA	NA
664	CASSPGQGGTEAFF	NA	1	1	NA	NA	NA	NA	NA	NA	NA	NA	NA	NA	NA	NA	NA	NA	NA	NA	NA	NA	NA	NA	NA	NA	NA	NA	NA	NA	NA	NA	TRB	HomoSapiens	ELAGIGILTV	MLANA	HomoSapiens	17061	TRBV4-1	TRBJ1-1	4	9	HLA-A*02:01	B2M	MHCI	https://www.10xgenomics.com/resources/application-notes/a-new-way-of-exploring-immunity-linking-highly-multiplexed-antigen-recognition-to-immune-repertoire-and-phenotype/#	0	HomoSapiens	TRB
665	CASSPGQGGYNEQFF	NA	1	NA	NA	NA	NA	NA	NA	NA	NA	NA	NA	NA	NA	NA	NA	NA	NA	NA	NA	NA	NA	NA	NA	NA	NA	NA	NA	NA	NA	NA	NA	NA	NA	NA	NA	NA	NA	NA	NA	NA	NA	NA	NA	NA	NA	NA	NA
666	CASSPGQGSDTQYF	NA	1	NA	NA	NA	NA	NA	NA	NA	NA	NA	NA	NA	NA	NA	NA	NA	NA	NA	NA	NA	NA	NA	NA	NA	NA	NA	NA	NA	NA	NA	NA	NA	NA	NA	NA	NA	NA	NA	NA	NA	NA	NA	NA	NA	NA	NA	NA
667	CASSPGQNTEAFF	NA	NA	1	NA	NA	NA	NA	NA	NA	NA	NA	NA	NA	NA	NA	NA	NA	NA	NA	NA	NA	NA	NA	NA	NA	NA	NA	NA	NA	NA	NA	TRB	HomoSapiens	KLGGALQAK	IE1	CMV	17957	TRBV7-9	TRBJ1-1	4	7	HLA-A*03:01	B2M	MHCI	https://www.10xgenomics.com/resources/application-notes/a-new-way-of-exploring-immunity-linking-highly-multiplexed-antigen-recognition-to-immune-repertoire-and-phenotype/#	0	HomoSapiens	TRB
668	CASSPGSGNTIYF	NA	NA	1	NA	NA	NA	NA	NA	NA	NA	NA	NA	NA	NA	NA	NA	NA	NA	NA	NA	NA	NA	NA	NA	NA	NA	NA	NA	NA	NA	NA	TRB	HomoSapiens	ELAGIGILTV	MLANA	HomoSapiens	2316	TRBV6-3	TRBJ1-3	4	6	HLA-A*02:01	B2M	MHCI	https://www.10xgenomics.com/resources/application-notes/a-new-way-of-exploring-immunity-linking-highly-multiplexed-antigen-recognition-to-immune-repertoire-and-phenotype/#	0	HomoSapiens	TRB
669	CASSPGSGNTIYF	NA	NA	1	NA	NA	NA	NA	NA	NA	NA	NA	NA	NA	NA	NA	NA	NA	NA	NA	NA	NA	NA	NA	NA	NA	NA	NA	NA	NA	NA	NA	TRB	HomoSapiens	LLLGIGILV	BST2	HomoSapiens	0	TRBV6-5	TRBJ1-3	4	6	HLA-A*02	B2M	MHCI	https://github.com/antigenomics/vdjdb-db/issues/193	0	HomoSapiens	TRB
670	CASSPGSNYGYTF	NA	1	NA	NA	NA	NA	NA	NA	NA	NA	NA	NA	NA	NA	NA	NA	NA	NA	NA	NA	NA	NA	NA	NA	NA	NA	NA	NA	NA	NA	NA	NA	NA	NA	NA	NA	NA	NA	NA	NA	NA	NA	NA	NA	NA	NA	NA	NA
671	CASSPLTDTQYF	NA	1	1	NA	NA	NA	NA	NA	NA	NA	NA	NA	NA	NA	NA	NA	NA	NA	NA	NA	NA	NA	NA	NA	NA	NA	NA	NA	NA	NA	NA	TRB	HomoSapiens	RAKFKQLL	BZLF1	EBV	0	TRBV27	TRBJ2-3*01,TRBJ2-3	4	6	HLA-B*08:01	B2M	MHCI	PMID:23267020,PMID:21555537,PMID:24512815	2	HomoSapiens	TRB
672	CASSPPGGNEQFF	NA	NA	1	NA	NA	NA	NA	NA	NA	NA	NA	NA	NA	NA	NA	NA	NA	NA	NA	NA	NA	NA	NA	NA	NA	NA	NA	NA	NA	NA	NA	TRB	HomoSapiens	IVTDFSVIK	EBNA4	EBV	3382	TRBV7-8	TRBJ2-1	4	8	HLA-A*11:01	B2M	MHCI	https://www.10xgenomics.com/resources/application-notes/a-new-way-of-exploring-immunity-linking-highly-multiplexed-antigen-recognition-to-immune-repertoire-and-phenotype/#	0	HomoSapiens	TRB
673	CASSPRGSGANVLTF	NA	1	NA	NA	NA	NA	NA	NA	NA	NA	NA	NA	NA	NA	NA	NA	NA	NA	NA	NA	NA	NA	NA	NA	NA	NA	NA	NA	NA	NA	NA	NA	NA	NA	NA	NA	NA	NA	NA	NA	NA	NA	NA	NA	NA	NA	NA	NA
674	CASSPSGSSYEQYF	NA	1	NA	NA	NA	NA	NA	NA	NA	NA	NA	NA	NA	NA	NA	NA	NA	NA	NA	NA	NA	NA	NA	NA	NA	NA	NA	NA	NA	NA	NA	NA	NA	NA	NA	NA	NA	NA	NA	NA	NA	NA	NA	NA	NA	NA	NA	NA
675	CASSPSTQSYEQYF	NA	1	NA	NA	NA	NA	NA	NA	NA	NA	NA	NA	NA	NA	NA	NA	NA	NA	NA	NA	NA	NA	NA	NA	NA	NA	NA	NA	NA	NA	NA	NA	NA	NA	NA	NA	NA	NA	NA	NA	NA	NA	NA	NA	NA	NA	NA	NA
676	CASSPTSTDTQYF	NA	NA	1	NA	NA	NA	NA	NA	NA	NA	NA	NA	NA	NA	NA	NA	NA	NA	NA	NA	NA	NA	NA	NA	NA	NA	NA	NA	NA	NA	NA	TRB	HomoSapiens	KLGGALQAK	IE1	CMV	14267	TRBV18	TRBJ2-3	5	6	HLA-A*03:01	B2M	MHCI	https://www.10xgenomics.com/resources/application-notes/a-new-way-of-exploring-immunity-linking-highly-multiplexed-antigen-recognition-to-immune-repertoire-and-phenotype/#	0	HomoSapiens	TRB
677	CASSQGGELFF	NA	1	NA	NA	NA	NA	NA	NA	NA	NA	NA	NA	NA	NA	NA	NA	NA	NA	NA	NA	NA	NA	NA	NA	NA	NA	NA	NA	NA	NA	NA	NA	NA	NA	NA	NA	NA	NA	NA	NA	NA	NA	NA	NA	NA	NA	NA	NA
678	CASSQGGGQPQHF	NA	NA	1	NA	NA	NA	NA	NA	NA	NA	NA	NA	NA	NA	NA	NA	NA	NA	NA	NA	NA	NA	NA	NA	NA	NA	NA	NA	NA	NA	NA	TRB	HomoSapiens	KLGGALQAK	IE1	CMV	19834	TRBV2	TRBJ1-5	4	8	HLA-A*03:01	B2M	MHCI	https://www.10xgenomics.com/resources/application-notes/a-new-way-of-exploring-immunity-linking-highly-multiplexed-antigen-recognition-to-immune-repertoire-and-phenotype/#	0	HomoSapiens	TRB
679	CASSQGQGRETQYF	NA	1	NA	NA	NA	NA	NA	NA	NA	NA	NA	NA	NA	NA	NA	NA	NA	NA	NA	NA	NA	NA	NA	NA	NA	NA	NA	NA	NA	NA	NA	NA	NA	NA	NA	NA	NA	NA	NA	NA	NA	NA	NA	NA	NA	NA	NA	NA
680	CASSQGTGEAYEQYF	NA	NA	1	NA	NA	NA	NA	NA	NA	NA	NA	NA	NA	NA	NA	NA	NA	NA	NA	NA	NA	NA	NA	NA	NA	NA	NA	NA	NA	NA	NA	TRB	HomoSapiens	ELAGIGILTV	MLANA	HomoSapiens	0	TRBV4-3	TRBJ2-7	5	10	HLA-A*02	B2M	MHCI	https://github.com/antigenomics/vdjdb-db/issues/193	0	HomoSapiens	TRB
681	CASSQRGGYGYTF	NA	1	NA	NA	NA	NA	NA	NA	NA	NA	NA	NA	NA	NA	NA	NA	NA	NA	NA	NA	NA	NA	NA	NA	NA	NA	NA	NA	NA	NA	NA	NA	NA	NA	NA	NA	NA	NA	NA	NA	NA	NA	NA	NA	NA	NA	NA	NA
682	CASSQTGGTEAFF	NA	NA	1	NA	NA	NA	NA	NA	NA	NA	NA	NA	NA	NA	NA	NA	NA	NA	NA	NA	NA	NA	NA	NA	NA	NA	NA	NA	NA	NA	NA	TRB	HomoSapiens	GLCTLVAML	BMLF1	EBV	0	TRBV12-3	TRBJ1-1	4	8	HLA-A*02	B2M	MHCI	PMID:29483360	0	HomoSapiens	TRB
683	CASSRDRGYEQYF	NA	1	1	NA	NA	NA	NA	NA	NA	NA	NA	NA	NA	NA	NA	NA	NA	NA	NA	NA	NA	NA	NA	NA	NA	NA	NA	NA	NA	NA	NA	TRB	HomoSapiens	NLVPMVATV	pp65	CMV	0	TRBV12-3	TRBJ2-7	4	8	HLA-A*02	B2M	MHCI	PMID:28423320	0	HomoSapiens	TRB
684	CASSRDRGYEQYF	NA	1	1	NA	NA	NA	NA	NA	NA	NA	NA	NA	NA	NA	NA	NA	NA	NA	NA	NA	NA	NA	NA	NA	NA	NA	NA	NA	NA	NA	NA	TRB	HomoSapiens	NLVPMVATV	pp65	CMV	0	TRBV12-3	TRBJ2-7	4	8	HLA-A*02	B2M	MHCI	PMID:28423320	0	HomoSapiens	TRB
685	CASSRDRGYEQYF	NA	1	1	NA	NA	NA	NA	NA	NA	NA	NA	NA	NA	NA	NA	NA	NA	NA	NA	NA	NA	NA	NA	NA	NA	NA	NA	NA	NA	NA	NA	TRB	HomoSapiens	NLVPMVATV	pp65	CMV	0	TRBV12-3	TRBJ2-7	4	8	HLA-A*02	B2M	MHCI	PMID:28423320	0	HomoSapiens	TRB
686	CASSRGGTEAFF	NA	1	1	NA	NA	NA	NA	NA	NA	NA	NA	NA	NA	NA	NA	NA	NA	NA	NA	NA	NA	NA	NA	NA	NA	NA	NA	NA	NA	NA	NA	TRB	HomoSapiens	NLVPMVATV	pp65	CMV	0	TRBV27	TRBJ1-1	4	7	HLA-A*02	B2M	MHCI	PMID:28423320	0	HomoSapiens	TRB
687	CASSRGNYGYTF	NA	1	NA	NA	NA	NA	NA	NA	NA	NA	NA	NA	NA	NA	NA	NA	NA	NA	NA	NA	NA	NA	NA	NA	NA	NA	NA	NA	NA	NA	NA	NA	NA	NA	NA	NA	NA	NA	NA	NA	NA	NA	NA	NA	NA	NA	NA	NA
688	CASSRGQANEKLFF	NA	1	NA	NA	NA	NA	NA	NA	NA	NA	NA	NA	NA	NA	NA	NA	NA	NA	NA	NA	NA	NA	NA	NA	NA	NA	NA	NA	NA	NA	NA	NA	NA	NA	NA	NA	NA	NA	NA	NA	NA	NA	NA	NA	NA	NA	NA	NA
689	CASSRGQGADTQYF	NA	NA	1	NA	NA	NA	NA	NA	NA	NA	NA	NA	NA	NA	NA	NA	NA	NA	NA	NA	NA	NA	NA	NA	NA	NA	NA	NA	NA	NA	NA	TRB	HomoSapiens	KLGGALQAK	IE1	CMV	15333	TRBV5-1	TRBJ2-3	4	9	HLA-A*03:01	B2M	MHCI	https://www.10xgenomics.com/resources/application-notes/a-new-way-of-exploring-immunity-linking-highly-multiplexed-antigen-recognition-to-immune-repertoire-and-phenotype/#	0	HomoSapiens	TRB
690	CASSRLAGGLETQYF	NA	1	NA	NA	NA	NA	NA	NA	NA	NA	NA	NA	NA	NA	NA	NA	NA	NA	NA	NA	NA	NA	NA	NA	NA	NA	NA	NA	NA	NA	NA	NA	NA	NA	NA	NA	NA	NA	NA	NA	NA	NA	NA	NA	NA	NA	NA	NA
691	CASSRLAGNTDTQYF	NA	1	1	NA	NA	NA	NA	NA	NA	NA	NA	NA	NA	NA	NA	NA	NA	NA	NA	NA	NA	NA	NA	NA	NA	NA	NA	NA	NA	NA	NA	TRB	HomoSapiens	QIKVRVDMV	IE1	CMV	20963	TRBV7-3*01	TRBJ2-3*01	4	9	HLA-B*08	B2M	MHCI	PMID:23637823	0	HomoSapiens	TRB
692	CASSRYQETQYF	NA	1	NA	NA	NA	NA	NA	NA	NA	NA	NA	NA	NA	NA	NA	NA	NA	NA	NA	NA	NA	NA	NA	NA	NA	NA	NA	NA	NA	NA	NA	NA	NA	NA	NA	NA	NA	NA	NA	NA	NA	NA	NA	NA	NA	NA	NA	NA
693	CASSSEYEQYF	NA	1	NA	NA	NA	NA	NA	NA	NA	NA	NA	NA	NA	NA	NA	NA	NA	NA	NA	NA	NA	NA	NA	NA	NA	NA	NA	NA	NA	NA	NA	NA	NA	NA	NA	NA	NA	NA	NA	NA	NA	NA	NA	NA	NA	NA	NA	NA
694	CASSSGGNTEAFF	NA	1	NA	NA	NA	NA	NA	NA	NA	NA	NA	NA	NA	NA	NA	NA	NA	NA	NA	NA	NA	NA	NA	NA	NA	NA	NA	NA	NA	NA	NA	NA	NA	NA	NA	NA	NA	NA	NA	NA	NA	NA	NA	NA	NA	NA	NA	NA
695	CASSSGQAYEQYF	NA	1	1	NA	NA	NA	NA	NA	NA	NA	NA	NA	NA	NA	NA	NA	NA	NA	NA	NA	NA	NA	NA	NA	NA	NA	NA	NA	NA	NA	NA	TRB	HomoSapiens	FLRGRAYGL	EBNA3A	EBV	2429824301	TRBV7-8,TRBV6S3	TRBJ2-7,TRBJ2S7	4	-1	HLA-B*08:01	B2M	MHCI	PMID:23267020,PMID:9862375,PMID:24512815	3	HomoSapiens	TRB
696	CASSSGTGSYEQYF	NA	1	NA	NA	NA	NA	NA	NA	NA	NA	NA	NA	NA	NA	NA	NA	NA	NA	NA	NA	NA	NA	NA	NA	NA	NA	NA	NA	NA	NA	NA	NA	NA	NA	NA	NA	NA	NA	NA	NA	NA	NA	NA	NA	NA	NA	NA	NA
697	CASSSTGETQYF	1	NA	1	NA	Human	Pathogens	Cytomegalovirus (CMV)	D003586	NA	1	Yes	pp65	P06725	RPHERNGFTVL	55170	HLA-B*07:02	PBMC	CD8	NA	NA	NA	NA	TRBV12-3/12-4	NA	TRBJ2-5	NA	NA	NA	30587531	NA	TRB	TRB	HomoSapiens	GILGFVFTL	M	InfluenzaA	0	TRBV11-2	TRBJ2-5	4	7	HLA-A*02	B2M	MHCI	PMID:28423320	0	HomoSapiens	TRB
698	CASSSYEQYF	NA	1	NA	NA	NA	NA	NA	NA	NA	NA	NA	NA	NA	NA	NA	NA	NA	NA	NA	NA	NA	NA	NA	NA	NA	NA	NA	NA	NA	NA	NA	NA	NA	NA	NA	NA	NA	NA	NA	NA	NA	NA	NA	NA	NA	NA	NA	NA
699	CASSSYEQYF	NA	1	NA	NA	NA	NA	NA	NA	NA	NA	NA	NA	NA	NA	NA	NA	NA	NA	NA	NA	NA	NA	NA	NA	NA	NA	NA	NA	NA	NA	NA	NA	NA	NA	NA	NA	NA	NA	NA	NA	NA	NA	NA	NA	NA	NA	NA	NA
700	CASSSYEQYF	NA	1	NA	NA	NA	NA	NA	NA	NA	NA	NA	NA	NA	NA	NA	NA	NA	NA	NA	NA	NA	NA	NA	NA	NA	NA	NA	NA	NA	NA	NA	NA	NA	NA	NA	NA	NA	NA	NA	NA	NA	NA	NA	NA	NA	NA	NA	NA
701	CASSVGQGVTYEQYF	1	1	1	NA	Human	Pathogens	Cytomegalovirus (CMV)	D003586	NA	1	Yes	pp50	P16790	VTEHDTLLY	71290	HLA-A1	PBMC	CD8	NA	NA	NA	NA	TRBV9	NA	TRBJ2-7	No	TGTGCCAGCAGCGTAGGGCAGGGAGTTACCTACGAGCAGTACTTC	NA	28636589	NA	TRB	TRB	HomoSapiens	VTEHDTLLY	pp50	CMV	0	TRBV9	TRBJ2-7	5	10	HLA-A*01:01	B2M	MHCI	PMID:28636589	1	HomoSapiens	TRB
702	CASSVGVDSTDTQYF	NA	NA	1	NA	NA	NA	NA	NA	NA	NA	NA	NA	NA	NA	NA	NA	NA	NA	NA	NA	NA	NA	NA	NA	NA	NA	NA	NA	NA	NA	NA	TRB	HomoSapiens	KLGGALQAK	IE1	CMV	6183	TRBV9	TRBJ2-3	5	8	HLA-A*03:01	B2M	MHCI	https://www.10xgenomics.com/resources/application-notes/a-new-way-of-exploring-immunity-linking-highly-multiplexed-antigen-recognition-to-immune-repertoire-and-phenotype/#	0	HomoSapiens	TRB
703	CASSVGVDSTDTQYF	NA	NA	1	NA	NA	NA	NA	NA	NA	NA	NA	NA	NA	NA	NA	NA	NA	NA	NA	NA	NA	NA	NA	NA	NA	NA	NA	NA	NA	NA	NA	TRB	HomoSapiens	AVFDRKSDAK	EBNA4	EBV	4365	TRBV9	TRBJ2-3	5	8	HLA-A*11:01	B2M	MHCI	https://www.10xgenomics.com/resources/application-notes/a-new-way-of-exploring-immunity-linking-highly-multiplexed-antigen-recognition-to-immune-repertoire-and-phenotype/#	0	HomoSapiens	TRB
704	CASSWDRAYEQYF	NA	NA	1	NA	NA	NA	NA	NA	NA	NA	NA	NA	NA	NA	NA	NA	NA	NA	NA	NA	NA	NA	NA	NA	NA	NA	NA	NA	NA	NA	NA	TRB	HomoSapiens	KLGGALQAK	IE1	CMV	11465	TRBV5-1	TRBJ2-7	4	8	HLA-A*03:01	B2M	MHCI	https://www.10xgenomics.com/resources/application-notes/a-new-way-of-exploring-immunity-linking-highly-multiplexed-antigen-recognition-to-immune-repertoire-and-phenotype/#	0	HomoSapiens	TRB
705	CASSWGGNTEAFF	NA	1	NA	NA	NA	NA	NA	NA	NA	NA	NA	NA	NA	NA	NA	NA	NA	NA	NA	NA	NA	NA	NA	NA	NA	NA	NA	NA	NA	NA	NA	NA	NA	NA	NA	NA	NA	NA	NA	NA	NA	NA	NA	NA	NA	NA	NA	NA
706	CASSYGGYEQYF	NA	1	1	NA	NA	NA	NA	NA	NA	NA	NA	NA	NA	NA	NA	NA	NA	NA	NA	NA	NA	NA	NA	NA	NA	NA	NA	NA	NA	NA	NA	TRB	HomoSapiens	NLVPMVATV	pp65	CMV	0	TRBV6-6	TRBJ2-7	5	7	HLA-A*02	B2M	MHCI	PMID:28423320	0	HomoSapiens	TRB
707	CASSYGGYEQYF	NA	1	1	NA	NA	NA	NA	NA	NA	NA	NA	NA	NA	NA	NA	NA	NA	NA	NA	NA	NA	NA	NA	NA	NA	NA	NA	NA	NA	NA	NA	TRB	HomoSapiens	GILGFVFTL	M	InfluenzaA	0	TRBV6-5	TRBJ2-7	5	7	HLA-A*02:01	B2M	MHCI	PMID:28636589	0	HomoSapiens	TRB
708	CASSYGQGYTEAFF	NA	NA	1	NA	NA	NA	NA	NA	NA	NA	NA	NA	NA	NA	NA	NA	NA	NA	NA	NA	NA	NA	NA	NA	NA	NA	NA	NA	NA	NA	NA	TRB	HomoSapiens	KLGGALQAK	IE1	CMV	10426	TRBV6-3	TRBJ1-1	5	9	HLA-A*03:01	B2M	MHCI	https://www.10xgenomics.com/resources/application-notes/a-new-way-of-exploring-immunity-linking-highly-multiplexed-antigen-recognition-to-immune-repertoire-and-phenotype/#	0	HomoSapiens	TRB
709	CASSYSGGDEQFF	NA	NA	1	NA	NA	NA	NA	NA	NA	NA	NA	NA	NA	NA	NA	NA	NA	NA	NA	NA	NA	NA	NA	NA	NA	NA	NA	NA	NA	NA	NA	TRB	HomoSapiens	GILGFVFTL	M	InfluenzaA	0	TRBV6-6	TRBJ2-1	5	9	HLA-A*02	B2M	MHCI	PMID:28423320	0	HomoSapiens	TRB
710	CASSYSRTGGLNTEAFF	NA	NA	1	NA	NA	NA	NA	NA	NA	NA	NA	NA	NA	NA	NA	NA	NA	NA	NA	NA	NA	NA	NA	NA	NA	NA	NA	NA	NA	NA	NA	TRB	HomoSapiens	KLGGALQAK	IE1	CMV	8425	TRBV6-5	TRBJ1-1	5	11	HLA-A*03:01	B2M	MHCI	https://www.10xgenomics.com/resources/application-notes/a-new-way-of-exploring-immunity-linking-highly-multiplexed-antigen-recognition-to-immune-repertoire-and-phenotype/#	0	HomoSapiens	TRB
711	CAWSPNTEAFF	NA	1	NA	NA	NA	NA	NA	NA	NA	NA	NA	NA	NA	NA	NA	NA	NA	NA	NA	NA	NA	NA	NA	NA	NA	NA	NA	NA	NA	NA	NA	NA	NA	NA	NA	NA	NA	NA	NA	NA	NA	NA	NA	NA	NA	NA	NA	NA
712	CSAGRLAGRTDTQYF	NA	1	NA	NA	NA	NA	NA	NA	NA	NA	NA	NA	NA	NA	NA	NA	NA	NA	NA	NA	NA	NA	NA	NA	NA	NA	NA	NA	NA	NA	NA	NA	NA	NA	NA	NA	NA	NA	NA	NA	NA	NA	NA	NA	NA	NA	NA	NA
713	CSARDGTGNGYTF	NA	1	1	NA	NA	NA	NA	NA	NA	NA	NA	NA	NA	NA	NA	NA	NA	NA	NA	NA	NA	NA	NA	NA	NA	NA	NA	NA	NA	NA	NA	TRB	HomoSapiens	NLVPMVATV	pp65	CMV	0	TRBV20-1	TRBJ1-2	4	9	HLA-A*02	B2M	MHCI	PMID:28423320	0	HomoSapiens	TRB
714	CSARDGTGNGYTF	NA	1	1	NA	NA	NA	NA	NA	NA	NA	NA	NA	NA	NA	NA	NA	NA	NA	NA	NA	NA	NA	NA	NA	NA	NA	NA	NA	NA	NA	NA	TRB	HomoSapiens	NLVPMVATV	pp65	CMV	0	TRBV20-1	TRBJ1-2	4	9	HLA-A*02	B2M	MHCI	PMID:28423320	0	HomoSapiens	TRB
715	CSARDGTGNGYTF	NA	1	1	NA	NA	NA	NA	NA	NA	NA	NA	NA	NA	NA	NA	NA	NA	NA	NA	NA	NA	NA	NA	NA	NA	NA	NA	NA	NA	NA	NA	TRB	HomoSapiens	NLVPMVATV	pp65	CMV	0	TRBV20-1	TRBJ1-2	4	9	HLA-A*02	B2M	MHCI	PMID:28423320	0	HomoSapiens	TRB
716	CSARDGTGNGYTF	NA	1	1	NA	NA	NA	NA	NA	NA	NA	NA	NA	NA	NA	NA	NA	NA	NA	NA	NA	NA	NA	NA	NA	NA	NA	NA	NA	NA	NA	NA	TRB	HomoSapiens	NLVPMVATV	pp65	CMV	0	TRBV20-1	TRBJ1-2	4	9	HLA-A*02	B2M	MHCI	PMID:28423320	0	HomoSapiens	TRB
717	CSARDGTGNGYTF	NA	1	1	NA	NA	NA	NA	NA	NA	NA	NA	NA	NA	NA	NA	NA	NA	NA	NA	NA	NA	NA	NA	NA	NA	NA	NA	NA	NA	NA	NA	TRB	HomoSapiens	NLVPMVATV	pp65	CMV	0	TRBV20-1	TRBJ1-2	4	9	HLA-A*02	B2M	MHCI	PMID:28423320	0	HomoSapiens	TRB
718	CSARDGTGNGYTF	NA	1	1	NA	NA	NA	NA	NA	NA	NA	NA	NA	NA	NA	NA	NA	NA	NA	NA	NA	NA	NA	NA	NA	NA	NA	NA	NA	NA	NA	NA	TRB	HomoSapiens	NLVPMVATV	pp65	CMV	0	TRBV20-1	TRBJ1-2	4	9	HLA-A*02	B2M	MHCI	PMID:28423320	0	HomoSapiens	TRB
719	CSARDGTGNGYTF	NA	1	1	NA	NA	NA	NA	NA	NA	NA	NA	NA	NA	NA	NA	NA	NA	NA	NA	NA	NA	NA	NA	NA	NA	NA	NA	NA	NA	NA	NA	TRB	HomoSapiens	NLVPMVATV	pp65	CMV	0	TRBV20-1	TRBJ1-2	4	9	HLA-A*02	B2M	MHCI	PMID:28423320	0	HomoSapiens	TRB
720	CSARDGTGNGYTF	NA	1	1	NA	NA	NA	NA	NA	NA	NA	NA	NA	NA	NA	NA	NA	NA	NA	NA	NA	NA	NA	NA	NA	NA	NA	NA	NA	NA	NA	NA	TRB	HomoSapiens	NLVPMVATV	pp65	CMV	0	TRBV20-1	TRBJ1-2	4	9	HLA-A*02	B2M	MHCI	PMID:28423320	0	HomoSapiens	TRB
721	CSARDGTGNGYTF	NA	1	1	NA	NA	NA	NA	NA	NA	NA	NA	NA	NA	NA	NA	NA	NA	NA	NA	NA	NA	NA	NA	NA	NA	NA	NA	NA	NA	NA	NA	TRB	HomoSapiens	NLVPMVATV	pp65	CMV	0	TRBV20-1	TRBJ1-2	4	9	HLA-A*02	B2M	MHCI	PMID:28423320	0	HomoSapiens	TRB
722	CSARDGTGNGYTF	NA	1	1	NA	NA	NA	NA	NA	NA	NA	NA	NA	NA	NA	NA	NA	NA	NA	NA	NA	NA	NA	NA	NA	NA	NA	NA	NA	NA	NA	NA	TRB	HomoSapiens	NLVPMVATV	pp65	CMV	0	TRBV20-1	TRBJ1-2	4	9	HLA-A*02	B2M	MHCI	PMID:28423320	0	HomoSapiens	TRB
723	CSARDGTGNGYTF	NA	1	1	NA	NA	NA	NA	NA	NA	NA	NA	NA	NA	NA	NA	NA	NA	NA	NA	NA	NA	NA	NA	NA	NA	NA	NA	NA	NA	NA	NA	TRB	HomoSapiens	GLCTLVAML	BMLF1	EBV	1.76E+32	TRBV20-1,TRBV20-1*01	TRBJ1-2*01,TRBJ1-2	4	9	HLA-A*02:01,HLA-A*02:01:48,HLA-A*02	B2M	MHCI	PMID:25801351,PMID:27645996,PMID:12504586,PMID:28636589,PMID:23267020,PMID:19017975,PMID:21124993,PMID:28636592,PMID:21555537,PMID:10925283	3	HomoSapiens	TRB
724	CSARDGTGNGYTF	NA	1	1	NA	NA	NA	NA	NA	NA	NA	NA	NA	NA	NA	NA	NA	NA	NA	NA	NA	NA	NA	NA	NA	NA	NA	NA	NA	NA	NA	NA	TRB	HomoSapiens	GLCTLVAML	BMLF1	EBV	1.76E+32	TRBV20-1,TRBV20-1*01	TRBJ1-2*01,TRBJ1-2	4	9	HLA-A*02:01,HLA-A*02:01:48,HLA-A*02	B2M	MHCI	PMID:25801351,PMID:27645996,PMID:12504586,PMID:28636589,PMID:23267020,PMID:19017975,PMID:21124993,PMID:28636592,PMID:21555537,PMID:10925283	3	HomoSapiens	TRB
725	CSARDGTGNGYTF	NA	1	1	NA	NA	NA	NA	NA	NA	NA	NA	NA	NA	NA	NA	NA	NA	NA	NA	NA	NA	NA	NA	NA	NA	NA	NA	NA	NA	NA	NA	TRB	HomoSapiens	GLCTLVAML	BMLF1	EBV	1.76E+32	TRBV20-1,TRBV20-1*01	TRBJ1-2*01,TRBJ1-2	4	9	HLA-A*02:01,HLA-A*02:01:48,HLA-A*02	B2M	MHCI	PMID:25801351,PMID:27645996,PMID:12504586,PMID:28636589,PMID:23267020,PMID:19017975,PMID:21124993,PMID:28636592,PMID:21555537,PMID:10925283	3	HomoSapiens	TRB
726	CSARDGTGNGYTF	NA	1	1	NA	NA	NA	NA	NA	NA	NA	NA	NA	NA	NA	NA	NA	NA	NA	NA	NA	NA	NA	NA	NA	NA	NA	NA	NA	NA	NA	NA	TRB	HomoSapiens	GLCTLVAML	BMLF1	EBV	1.76E+32	TRBV20-1,TRBV20-1*01	TRBJ1-2*01,TRBJ1-2	4	9	HLA-A*02:01,HLA-A*02:01:48,HLA-A*02	B2M	MHCI	PMID:25801351,PMID:27645996,PMID:12504586,PMID:28636589,PMID:23267020,PMID:19017975,PMID:21124993,PMID:28636592,PMID:21555537,PMID:10925283	3	HomoSapiens	TRB
727	CSARDGTGNGYTF	NA	1	1	NA	NA	NA	NA	NA	NA	NA	NA	NA	NA	NA	NA	NA	NA	NA	NA	NA	NA	NA	NA	NA	NA	NA	NA	NA	NA	NA	NA	TRB	HomoSapiens	GLCTLVAML	BMLF1	EBV	1.76E+32	TRBV20-1,TRBV20-1*01	TRBJ1-2*01,TRBJ1-2	4	9	HLA-A*02:01,HLA-A*02:01:48,HLA-A*02	B2M	MHCI	PMID:25801351,PMID:27645996,PMID:12504586,PMID:28636589,PMID:23267020,PMID:19017975,PMID:21124993,PMID:28636592,PMID:21555537,PMID:10925283	3	HomoSapiens	TRB
728	CSARDGTGNGYTF	NA	1	1	NA	NA	NA	NA	NA	NA	NA	NA	NA	NA	NA	NA	NA	NA	NA	NA	NA	NA	NA	NA	NA	NA	NA	NA	NA	NA	NA	NA	TRB	HomoSapiens	GLCTLVAML	BMLF1	EBV	1.76E+32	TRBV20-1,TRBV20-1*01	TRBJ1-2*01,TRBJ1-2	4	9	HLA-A*02:01,HLA-A*02:01:48,HLA-A*02	B2M	MHCI	PMID:25801351,PMID:27645996,PMID:12504586,PMID:28636589,PMID:23267020,PMID:19017975,PMID:21124993,PMID:28636592,PMID:21555537,PMID:10925283	3	HomoSapiens	TRB
729	CSARDGTGNGYTF	NA	1	1	NA	NA	NA	NA	NA	NA	NA	NA	NA	NA	NA	NA	NA	NA	NA	NA	NA	NA	NA	NA	NA	NA	NA	NA	NA	NA	NA	NA	TRB	HomoSapiens	GLCTLVAML	BMLF1	EBV	1.76E+32	TRBV20-1,TRBV20-1*01	TRBJ1-2*01,TRBJ1-2	4	9	HLA-A*02:01,HLA-A*02:01:48,HLA-A*02	B2M	MHCI	PMID:25801351,PMID:27645996,PMID:12504586,PMID:28636589,PMID:23267020,PMID:19017975,PMID:21124993,PMID:28636592,PMID:21555537,PMID:10925283	3	HomoSapiens	TRB
730	CSARDGTGNGYTF	NA	1	1	NA	NA	NA	NA	NA	NA	NA	NA	NA	NA	NA	NA	NA	NA	NA	NA	NA	NA	NA	NA	NA	NA	NA	NA	NA	NA	NA	NA	TRB	HomoSapiens	GLCTLVAML	BMLF1	EBV	1.76E+32	TRBV20-1,TRBV20-1*01	TRBJ1-2*01,TRBJ1-2	4	9	HLA-A*02:01,HLA-A*02:01:48,HLA-A*02	B2M	MHCI	PMID:25801351,PMID:27645996,PMID:12504586,PMID:28636589,PMID:23267020,PMID:19017975,PMID:21124993,PMID:28636592,PMID:21555537,PMID:10925283	3	HomoSapiens	TRB
731	CSARDGTGNGYTF	NA	1	1	NA	NA	NA	NA	NA	NA	NA	NA	NA	NA	NA	NA	NA	NA	NA	NA	NA	NA	NA	NA	NA	NA	NA	NA	NA	NA	NA	NA	TRB	HomoSapiens	GLCTLVAML	BMLF1	EBV	1.76E+32	TRBV20-1,TRBV20-1*01	TRBJ1-2*01,TRBJ1-2	4	9	HLA-A*02:01,HLA-A*02:01:48,HLA-A*02	B2M	MHCI	PMID:25801351,PMID:27645996,PMID:12504586,PMID:28636589,PMID:23267020,PMID:19017975,PMID:21124993,PMID:28636592,PMID:21555537,PMID:10925283	3	HomoSapiens	TRB
732	CSARDGTGNGYTF	NA	1	1	NA	NA	NA	NA	NA	NA	NA	NA	NA	NA	NA	NA	NA	NA	NA	NA	NA	NA	NA	NA	NA	NA	NA	NA	NA	NA	NA	NA	TRB	HomoSapiens	GLCTLVAML	BMLF1	EBV	1.76E+32	TRBV20-1,TRBV20-1*01	TRBJ1-2*01,TRBJ1-2	4	9	HLA-A*02:01,HLA-A*02:01:48,HLA-A*02	B2M	MHCI	PMID:25801351,PMID:27645996,PMID:12504586,PMID:28636589,PMID:23267020,PMID:19017975,PMID:21124993,PMID:28636592,PMID:21555537,PMID:10925283	3	HomoSapiens	TRB
733	CSARQGAYEQYF	NA	1	NA	NA	NA	NA	NA	NA	NA	NA	NA	NA	NA	NA	NA	NA	NA	NA	NA	NA	NA	NA	NA	NA	NA	NA	NA	NA	NA	NA	NA	NA	NA	NA	NA	NA	NA	NA	NA	NA	NA	NA	NA	NA	NA	NA	NA	NA
734	CSARVGVGNTIYF	NA	1	1	NA	NA	NA	NA	NA	NA	NA	NA	NA	NA	NA	NA	NA	NA	NA	NA	NA	NA	NA	NA	NA	NA	NA	NA	NA	NA	NA	NA	TRB	HomoSapiens	GLCTLVAML	BMLF1	EBV	2220761	TRBV20-1,TRBV2S1	TRBJ1S3,TRBJ1-3	4	7	HLA-A*02:01	B2M	MHCI	PMID:27645996,PMID:11046006,PMID:28636589,PMID:19017975	1	HomoSapiens	TRB
735	CSARVGVGNTIYF	NA	1	1	NA	NA	NA	NA	NA	NA	NA	NA	NA	NA	NA	NA	NA	NA	NA	NA	NA	NA	NA	NA	NA	NA	NA	NA	NA	NA	NA	NA	TRB	HomoSapiens	GLCTLVAML	BMLF1	EBV	2220761	TRBV20-1,TRBV2S1	TRBJ1S3,TRBJ1-3	4	7	HLA-A*02:01	B2M	MHCI	PMID:27645996,PMID:11046006,PMID:28636589,PMID:19017975	1	HomoSapiens	TRB
736	CSARVGVGNTIYF	NA	1	1	NA	NA	NA	NA	NA	NA	NA	NA	NA	NA	NA	NA	NA	NA	NA	NA	NA	NA	NA	NA	NA	NA	NA	NA	NA	NA	NA	NA	TRB	HomoSapiens	GLCTLVAML	BMLF1	EBV	2220761	TRBV20-1,TRBV2S1	TRBJ1S3,TRBJ1-3	4	7	HLA-A*02:01	B2M	MHCI	PMID:27645996,PMID:11046006,PMID:28636589,PMID:19017975	1	HomoSapiens	TRB
737	CSARVGVGNTIYF	NA	1	1	NA	NA	NA	NA	NA	NA	NA	NA	NA	NA	NA	NA	NA	NA	NA	NA	NA	NA	NA	NA	NA	NA	NA	NA	NA	NA	NA	NA	TRB	HomoSapiens	GLCTLVAML	BMLF1	EBV	2220761	TRBV20-1,TRBV2S1	TRBJ1S3,TRBJ1-3	4	7	HLA-A*02:01	B2M	MHCI	PMID:27645996,PMID:11046006,PMID:28636589,PMID:19017975	1	HomoSapiens	TRB
738	CSVKENTGELFF	NA	1	NA	NA	NA	NA	NA	NA	NA	NA	NA	NA	NA	NA	NA	NA	NA	NA	NA	NA	NA	NA	NA	NA	NA	NA	NA	NA	NA	NA	NA	NA	NA	NA	NA	NA	NA	NA	NA	NA	NA	NA	NA	NA	NA	NA	NA	NA
739	CASGDSGNTIYF	NA	NA	4	NA	NA	NA	NA	NA	NA	NA	NA	NA	NA	NA	NA	NA	NA	NA	NA	NA	NA	NA	NA	NA	NA	NA	NA	NA	NA	NA	NA	TRB	HomoSapiens	ELAGIGILTV	MLANA	HomoSapiens	3649	TRBV12-4	TRBJ1-3	3	5	HLA-A*02:01	B2M	MHCI	https://www.10xgenomics.com/resources/application-notes/a-new-way-of-exploring-immunity-linking-highly-multiplexed-antigen-recognition-to-immune-repertoire-and-phenotype/#	0	HomoSapiens	TRB
740	CASGPGTDTQYF	NA	1	NA	NA	NA	NA	NA	NA	NA	NA	NA	NA	NA	NA	NA	NA	NA	NA	NA	NA	NA	NA	NA	NA	NA	NA	NA	NA	NA	NA	NA	NA	NA	NA	NA	NA	NA	NA	NA	NA	NA	NA	NA	NA	NA	NA	NA	NA
741	CASRQGAEAFF	NA	1	NA	NA	NA	NA	NA	NA	NA	NA	NA	NA	NA	NA	NA	NA	NA	NA	NA	NA	NA	NA	NA	NA	NA	NA	NA	NA	NA	NA	NA	NA	NA	NA	NA	NA	NA	NA	NA	NA	NA	NA	NA	NA	NA	NA	NA	NA
742	CASSEDGMNTEAFF	NA	1	1	NA	NA	NA	NA	NA	NA	NA	NA	NA	NA	NA	NA	NA	NA	NA	NA	NA	NA	NA	NA	NA	NA	NA	NA	NA	NA	NA	NA	TRB	HomoSapiens	KLGGALQAK	IE1	CMV	5409	TRBV10-2	TRBJ1-1	5	8	HLA-A*03:01	B2M	MHCI	https://www.10xgenomics.com/resources/application-notes/a-new-way-of-exploring-immunity-linking-highly-multiplexed-antigen-recognition-to-immune-repertoire-and-phenotype/#	0	HomoSapiens	TRB
743	CASSEDGMNTEAFF	NA	1	1	NA	NA	NA	NA	NA	NA	NA	NA	NA	NA	NA	NA	NA	NA	NA	NA	NA	NA	NA	NA	NA	NA	NA	NA	NA	NA	NA	NA	TRB	HomoSapiens	NLVPMVATV	pp65	CMV	0	TRBV10-2	TRBJ1-1	5	8	HLA-A*02	B2M	MHCI	https://github.com/antigenomics/vdjdb-db/issues/288	0	HomoSapiens	TRB
744	CASSERGFNEKLFF	NA	1	NA	NA	NA	NA	NA	NA	NA	NA	NA	NA	NA	NA	NA	NA	NA	NA	NA	NA	NA	NA	NA	NA	NA	NA	NA	NA	NA	NA	NA	NA	NA	NA	NA	NA	NA	NA	NA	NA	NA	NA	NA	NA	NA	NA	NA	NA
745	CASSFGQNTEAFF	NA	NA	2	NA	NA	NA	NA	NA	NA	NA	NA	NA	NA	NA	NA	NA	NA	NA	NA	NA	NA	NA	NA	NA	NA	NA	NA	NA	NA	NA	NA	TRB	HomoSapiens	KLGGALQAK	IE1	CMV	2707	TRBV11-2	TRBJ1-1	4	7	HLA-A*03:01	B2M	MHCI	https://www.10xgenomics.com/resources/application-notes/a-new-way-of-exploring-immunity-linking-highly-multiplexed-antigen-recognition-to-immune-repertoire-and-phenotype/#	0	HomoSapiens	TRB
746	CASSIHSNQPQHF	NA	NA	1	NA	NA	NA	NA	NA	NA	NA	NA	NA	NA	NA	NA	NA	NA	NA	NA	NA	NA	NA	NA	NA	NA	NA	NA	NA	NA	NA	NA	TRB	HomoSapiens	GILGFVFTL	M	InfluenzaA	2420	TRBV19	TRBJ1-5	5	6	HLA-A*02:01,HLA-A*02	B2M	MHCI	PMID:28423320,https://www.10xgenomics.com/resources/application-notes/a-new-way-of-exploring-immunity-linking-highly-multiplexed-antigen-recognition-to-immune-repertoire-and-phenotype/#	0	HomoSapiens	TRB
747	CASSLAGGTEAFF	NA	NA	1	NA	NA	NA	NA	NA	NA	NA	NA	NA	NA	NA	NA	NA	NA	NA	NA	NA	NA	NA	NA	NA	NA	NA	NA	NA	NA	NA	NA	TRB	HomoSapiens	KLGGALQAK	IE1	CMV	9405	TRBV5-1	TRBJ1-1	5	8	HLA-A*03:01	B2M	MHCI	https://www.10xgenomics.com/resources/application-notes/a-new-way-of-exploring-immunity-linking-highly-multiplexed-antigen-recognition-to-immune-repertoire-and-phenotype/#	0	HomoSapiens	TRB
748	CASSLAGGTYEQYF	NA	NA	1	NA	NA	NA	NA	NA	NA	NA	NA	NA	NA	NA	NA	NA	NA	NA	NA	NA	NA	NA	NA	NA	NA	NA	NA	NA	NA	NA	NA	TRB	HomoSapiens	KLGGALQAK	IE1	CMV	12216	TRBV5-1	TRBJ2-7	5	9	HLA-A*03:01	B2M	MHCI	https://www.10xgenomics.com/resources/application-notes/a-new-way-of-exploring-immunity-linking-highly-multiplexed-antigen-recognition-to-immune-repertoire-and-phenotype/#	0	HomoSapiens	TRB
749	CASSLDRASYEQYF	NA	1	NA	NA	NA	NA	NA	NA	NA	NA	NA	NA	NA	NA	NA	NA	NA	NA	NA	NA	NA	NA	NA	NA	NA	NA	NA	NA	NA	NA	NA	NA	NA	NA	NA	NA	NA	NA	NA	NA	NA	NA	NA	NA	NA	NA	NA	NA
750	CASSLDRVTGELFF	NA	NA	1	NA	NA	NA	NA	NA	NA	NA	NA	NA	NA	NA	NA	NA	NA	NA	NA	NA	NA	NA	NA	NA	NA	NA	NA	NA	NA	NA	NA	TRB	HomoSapiens	NLVPMVATV	pp65	CMV	24318	TRBV27	TRBJ2-2	5	8	HLA-A*02:01,HLA-A*02	B2M	MHCI	PMID:25925682,PMID:28934479	1	HomoSapiens	TRB
751	CASSLETGSSYEQYF	NA	1	NA	NA	NA	NA	NA	NA	NA	NA	NA	NA	NA	NA	NA	NA	NA	NA	NA	NA	NA	NA	NA	NA	NA	NA	NA	NA	NA	NA	NA	NA	NA	NA	NA	NA	NA	NA	NA	NA	NA	NA	NA	NA	NA	NA	NA	NA
752	CASSLGGGTEAFF	NA	1	1	NA	NA	NA	NA	NA	NA	NA	NA	NA	NA	NA	NA	NA	NA	NA	NA	NA	NA	NA	NA	NA	NA	NA	NA	NA	NA	NA	NA	TRB	HomoSapiens	ELAGIGILTV	MLANA	HomoSapiens	9087	TRBV11-2	TRBJ1-1	5	8	HLA-A*02:01	B2M	MHCI	https://www.10xgenomics.com/resources/application-notes/a-new-way-of-exploring-immunity-linking-highly-multiplexed-antigen-recognition-to-immune-repertoire-and-phenotype/#	0	HomoSapiens	TRB
753	CASSLGGGTEAFF	NA	1	1	NA	NA	NA	NA	NA	NA	NA	NA	NA	NA	NA	NA	NA	NA	NA	NA	NA	NA	NA	NA	NA	NA	NA	NA	NA	NA	NA	NA	TRB	HomoSapiens	NLVPMVATV	pp65	CMV	0	TRBV12-3	TRBJ1-1	5	8	HLA-A*02	B2M	MHCI	PMID:28423320	0	HomoSapiens	TRB
754	CASSLGGRQPQHF	NA	1	NA	NA	NA	NA	NA	NA	NA	NA	NA	NA	NA	NA	NA	NA	NA	NA	NA	NA	NA	NA	NA	NA	NA	NA	NA	NA	NA	NA	NA	NA	NA	NA	NA	NA	NA	NA	NA	NA	NA	NA	NA	NA	NA	NA	NA	NA
755	CASSLGGSYGYTF	NA	NA	1	NA	NA	NA	NA	NA	NA	NA	NA	NA	NA	NA	NA	NA	NA	NA	NA	NA	NA	NA	NA	NA	NA	NA	NA	NA	NA	NA	NA	TRB	HomoSapiens	NLSALGIFST	IGF2BP2	HomoSapiens	0	TRBV27	TRBJ1-2	5	8	HLA-A*02	B2M	MHCI	PMID:29483360	0	HomoSapiens	TRB
756	CASSLGQGDTEAFF	NA	NA	1	NA	NA	NA	NA	NA	NA	NA	NA	NA	NA	NA	NA	NA	NA	NA	NA	NA	NA	NA	NA	NA	NA	NA	NA	NA	NA	NA	NA	TRB	HomoSapiens	KLGGALQAK	IE1	CMV	10860	TRBV7-9	TRBJ1-1	5	9	HLA-A*03:01	B2M	MHCI	https://www.10xgenomics.com/resources/application-notes/a-new-way-of-exploring-immunity-linking-highly-multiplexed-antigen-recognition-to-immune-repertoire-and-phenotype/#	0	HomoSapiens	TRB
757	CASSLGTNNEQFF	NA	2	NA	NA	NA	NA	NA	NA	NA	NA	NA	NA	NA	NA	NA	NA	NA	NA	NA	NA	NA	NA	NA	NA	NA	NA	NA	NA	NA	NA	NA	NA	NA	NA	NA	NA	NA	NA	NA	NA	NA	NA	NA	NA	NA	NA	NA	NA
758	CASSLQSQETQYF	NA	1	NA	NA	NA	NA	NA	NA	NA	NA	NA	NA	NA	NA	NA	NA	NA	NA	NA	NA	NA	NA	NA	NA	NA	NA	NA	NA	NA	NA	NA	NA	NA	NA	NA	NA	NA	NA	NA	NA	NA	NA	NA	NA	NA	NA	NA	NA
759	CASSLQSQETQYF	NA	1	NA	NA	NA	NA	NA	NA	NA	NA	NA	NA	NA	NA	NA	NA	NA	NA	NA	NA	NA	NA	NA	NA	NA	NA	NA	NA	NA	NA	NA	NA	NA	NA	NA	NA	NA	NA	NA	NA	NA	NA	NA	NA	NA	NA	NA	NA
760	CASSLQSQETQYF	NA	1	NA	NA	NA	NA	NA	NA	NA	NA	NA	NA	NA	NA	NA	NA	NA	NA	NA	NA	NA	NA	NA	NA	NA	NA	NA	NA	NA	NA	NA	NA	NA	NA	NA	NA	NA	NA	NA	NA	NA	NA	NA	NA	NA	NA	NA	NA
761	CASSLRETQYF	NA	1	NA	NA	NA	NA	NA	NA	NA	NA	NA	NA	NA	NA	NA	NA	NA	NA	NA	NA	NA	NA	NA	NA	NA	NA	NA	NA	NA	NA	NA	NA	NA	NA	NA	NA	NA	NA	NA	NA	NA	NA	NA	NA	NA	NA	NA	NA
762	CASSLSGSSYNEQFF	NA	1	1	NA	NA	NA	NA	NA	NA	NA	NA	NA	NA	NA	NA	NA	NA	NA	NA	NA	NA	NA	NA	NA	NA	NA	NA	NA	NA	NA	NA	TRB	HomoSapiens	KLGGALQAK	IE1	CMV	19179	TRBV7-9	TRBJ2-1	5	8	HLA-A*03:01	B2M	MHCI	https://www.10xgenomics.com/resources/application-notes/a-new-way-of-exploring-immunity-linking-highly-multiplexed-antigen-recognition-to-immune-repertoire-and-phenotype/#	0	HomoSapiens	TRB
763	CASSLTGGYGYTF	NA	1	NA	NA	NA	NA	NA	NA	NA	NA	NA	NA	NA	NA	NA	NA	NA	NA	NA	NA	NA	NA	NA	NA	NA	NA	NA	NA	NA	NA	NA	NA	NA	NA	NA	NA	NA	NA	NA	NA	NA	NA	NA	NA	NA	NA	NA	NA
764	CASSLTGGYGYTF	NA	1	NA	NA	NA	NA	NA	NA	NA	NA	NA	NA	NA	NA	NA	NA	NA	NA	NA	NA	NA	NA	NA	NA	NA	NA	NA	NA	NA	NA	NA	NA	NA	NA	NA	NA	NA	NA	NA	NA	NA	NA	NA	NA	NA	NA	NA	NA
765	CASSLTGLEAFF	NA	1	1	NA	NA	NA	NA	NA	NA	NA	NA	NA	NA	NA	NA	NA	NA	NA	NA	NA	NA	NA	NA	NA	NA	NA	NA	NA	NA	NA	NA	TRB	HomoSapiens	NLVPMVATV	pp65	CMV	0	TRBV12-3	TRBJ1-1	5	8	HLA-A*02	B2M	MHCI	PMID:28423320	0	HomoSapiens	TRB
766	CASSLTNEKLFF	NA	3	NA	NA	NA	NA	NA	NA	NA	NA	NA	NA	NA	NA	NA	NA	NA	NA	NA	NA	NA	NA	NA	NA	NA	NA	NA	NA	NA	NA	NA	NA	NA	NA	NA	NA	NA	NA	NA	NA	NA	NA	NA	NA	NA	NA	NA	NA
767	CASSPDDRTQYF	NA	1	NA	NA	NA	NA	NA	NA	NA	NA	NA	NA	NA	NA	NA	NA	NA	NA	NA	NA	NA	NA	NA	NA	NA	NA	NA	NA	NA	NA	NA	NA	NA	NA	NA	NA	NA	NA	NA	NA	NA	NA	NA	NA	NA	NA	NA	NA
768	CASSPGGSYNEQFF	NA	NA	2	NA	NA	NA	NA	NA	NA	NA	NA	NA	NA	NA	NA	NA	NA	NA	NA	NA	NA	NA	NA	NA	NA	NA	NA	NA	NA	NA	NA	TRB	HomoSapiens	KLGGALQAK	IE1	CMV	2327	TRBV18	TRBJ2-1	5	7	HLA-A*03:01	B2M	MHCI	https://www.10xgenomics.com/resources/application-notes/a-new-way-of-exploring-immunity-linking-highly-multiplexed-antigen-recognition-to-immune-repertoire-and-phenotype/#	0	HomoSapiens	TRB
769	CASSPGTSYNEQFF	NA	NA	1	NA	NA	NA	NA	NA	NA	NA	NA	NA	NA	NA	NA	NA	NA	NA	NA	NA	NA	NA	NA	NA	NA	NA	NA	NA	NA	NA	NA	TRB	HomoSapiens	AVFDRKSDAK	EBNA4	EBV	3774	TRBV19	TRBJ2-1	4	7	HLA-A*11:01	B2M	MHCI	https://www.10xgenomics.com/resources/application-notes/a-new-way-of-exploring-immunity-linking-highly-multiplexed-antigen-recognition-to-immune-repertoire-and-phenotype/#	0	HomoSapiens	TRB
770	CASSPGVSYEQYF	NA	NA	1	NA	NA	NA	NA	NA	NA	NA	NA	NA	NA	NA	NA	NA	NA	NA	NA	NA	NA	NA	NA	NA	NA	NA	NA	NA	NA	NA	NA	TRB	HomoSapiens	KLGGALQAK	IE1	CMV	16809	TRBV19	TRBJ2-7	4	7	HLA-A*03:01	B2M	MHCI	https://www.10xgenomics.com/resources/application-notes/a-new-way-of-exploring-immunity-linking-highly-multiplexed-antigen-recognition-to-immune-repertoire-and-phenotype/#	0	HomoSapiens	TRB
771	CASSPQDYGYTF	NA	NA	1	NA	NA	NA	NA	NA	NA	NA	NA	NA	NA	NA	NA	NA	NA	NA	NA	NA	NA	NA	NA	NA	NA	NA	NA	NA	NA	NA	NA	TRB	HomoSapiens	DPFRLLQNSQVFS	NP	InfluenzaA	0	TRBV5-6	TRBJ1-2	4	7	HLA-DRA*01	HLA-DRB1*01	MHCII	https://github.com/antigenomics/vdjdb-db/issues/291	0	HomoSapiens	TRB
772	CASSQDRLTGGYTF	NA	NA	1	NA	NA	NA	NA	NA	NA	NA	NA	NA	NA	NA	NA	NA	NA	NA	NA	NA	NA	NA	NA	NA	NA	NA	NA	NA	NA	NA	NA	TRB	HomoSapiens	RPPIFIRRL	EBNA3A	EBV	0	TRBV4-1	TRBJ1-2	5	10	HLA-B*07:02	B2M	MHCI	PMID:23267020,PMID:24512815	3	HomoSapiens	TRB
773	CASSRDLSGANVLTF	NA	NA	1	NA	NA	NA	NA	NA	NA	NA	NA	NA	NA	NA	NA	NA	NA	NA	NA	NA	NA	NA	NA	NA	NA	NA	NA	NA	NA	NA	NA	TRB	HomoSapiens	AVFDRKSDAK	EBNA4	EBV	645	TRBV10-1	TRBJ2-6	4	7	HLA-A*11:01	B2M	MHCI	https://www.10xgenomics.com/resources/application-notes/a-new-way-of-exploring-immunity-linking-highly-multiplexed-antigen-recognition-to-immune-repertoire-and-phenotype/#	0	HomoSapiens	TRB
774	CASSRDLSGANVLTF	NA	NA	1	NA	NA	NA	NA	NA	NA	NA	NA	NA	NA	NA	NA	NA	NA	NA	NA	NA	NA	NA	NA	NA	NA	NA	NA	NA	NA	NA	NA	TRB	HomoSapiens	KLGGALQAK	IE1	CMV	4579	TRBV10-1	TRBJ2-6	4	7	HLA-A*03:01	B2M	MHCI	https://www.10xgenomics.com/resources/application-notes/a-new-way-of-exploring-immunity-linking-highly-multiplexed-antigen-recognition-to-immune-repertoire-and-phenotype/#	0	HomoSapiens	TRB
775	CASSSGQGTDTQYF	NA	1	NA	NA	NA	NA	NA	NA	NA	NA	NA	NA	NA	NA	NA	NA	NA	NA	NA	NA	NA	NA	NA	NA	NA	NA	NA	NA	NA	NA	NA	NA	NA	NA	NA	NA	NA	NA	NA	NA	NA	NA	NA	NA	NA	NA	NA	NA
776	CASSSGTANTEAFF	NA	NA	1	NA	NA	NA	NA	NA	NA	NA	NA	NA	NA	NA	NA	NA	NA	NA	NA	NA	NA	NA	NA	NA	NA	NA	NA	NA	NA	NA	NA	TRB	HomoSapiens	KLGGALQAK	IE1	CMV	9500	TRBV19	TRBJ1-1	4	8	HLA-A*03:01	B2M	MHCI	https://www.10xgenomics.com/resources/application-notes/a-new-way-of-exploring-immunity-linking-highly-multiplexed-antigen-recognition-to-immune-repertoire-and-phenotype/#	0	HomoSapiens	TRB
777	CASSTSGTYEQYF	NA	1	NA	NA	NA	NA	NA	NA	NA	NA	NA	NA	NA	NA	NA	NA	NA	NA	NA	NA	NA	NA	NA	NA	NA	NA	NA	NA	NA	NA	NA	NA	NA	NA	NA	NA	NA	NA	NA	NA	NA	NA	NA	NA	NA	NA	NA	NA
778	CASSVNYEQYF	NA	1	NA	NA	NA	NA	NA	NA	NA	NA	NA	NA	NA	NA	NA	NA	NA	NA	NA	NA	NA	NA	NA	NA	NA	NA	NA	NA	NA	NA	NA	NA	NA	NA	NA	NA	NA	NA	NA	NA	NA	NA	NA	NA	NA	NA	NA	NA
779	CASSWGTGELFF	NA	NA	1	NA	NA	NA	NA	NA	NA	NA	NA	NA	NA	NA	NA	NA	NA	NA	NA	NA	NA	NA	NA	NA	NA	NA	NA	NA	NA	NA	NA	TRB	HomoSapiens	KLGGALQAK	IE1	CMV	16526	TRBV5-4	TRBJ2-2	4	6	HLA-A*03:01	B2M	MHCI	https://www.10xgenomics.com/resources/application-notes/a-new-way-of-exploring-immunity-linking-highly-multiplexed-antigen-recognition-to-immune-repertoire-and-phenotype/#	0	HomoSapiens	TRB
780	CASSLGRNTEAFF	NA	2	2	NA	NA	NA	NA	NA	NA	NA	NA	NA	NA	NA	NA	NA	NA	NA	NA	NA	NA	NA	NA	NA	NA	NA	NA	NA	NA	NA	NA	TRB	HomoSapiens	KLGGALQAK	IE1	CMV	9128	TRBV27	TRBJ1-1	5	7	HLA-A*03:01	B2M	MHCI	https://www.10xgenomics.com/resources/application-notes/a-new-way-of-exploring-immunity-linking-highly-multiplexed-antigen-recognition-to-immune-repertoire-and-phenotype/#	0	HomoSapiens	TRB
781	CASSLGRNTEAFF	NA	2	2	NA	NA	NA	NA	NA	NA	NA	NA	NA	NA	NA	NA	NA	NA	NA	NA	NA	NA	NA	NA	NA	NA	NA	NA	NA	NA	NA	NA	TRB	HomoSapiens	NLVPMVATV	pp65	CMV	0	TRBV27	TRBJ1-1	5	7	HLA-A*02	B2M	MHCI	PMID:28423320	0	HomoSapiens	TRB
782	CASSLGTGGYEQYF	NA	NA	2	NA	NA	NA	NA	NA	NA	NA	NA	NA	NA	NA	NA	NA	NA	NA	NA	NA	NA	NA	NA	NA	NA	NA	NA	NA	NA	NA	NA	TRB	HomoSapiens	GTSGSPIVNR	NS3	DENV1	0	TRBV7-8	TRBJ2-7	5	10	HLA-A*11:01	B2M	MHCI	PMID:28945243	0	HomoSapiens	TRB
783	CASSLRGNEQFF	NA	2	NA	NA	NA	NA	NA	NA	NA	NA	NA	NA	NA	NA	NA	NA	NA	NA	NA	NA	NA	NA	NA	NA	NA	NA	NA	NA	NA	NA	NA	NA	NA	NA	NA	NA	NA	NA	NA	NA	NA	NA	NA	NA	NA	NA	NA	NA
784	CASSPGQGNEKLFF	NA	2	NA	NA	NA	NA	NA	NA	NA	NA	NA	NA	NA	NA	NA	NA	NA	NA	NA	NA	NA	NA	NA	NA	NA	NA	NA	NA	NA	NA	NA	NA	NA	NA	NA	NA	NA	NA	NA	NA	NA	NA	NA	NA	NA	NA	NA	NA
785	CASSVGGTEAFF	NA	NA	2	NA	NA	NA	NA	NA	NA	NA	NA	NA	NA	NA	NA	NA	NA	NA	NA	NA	NA	NA	NA	NA	NA	NA	NA	NA	NA	NA	NA	TRB	HomoSapiens	KLGGALQAK	IE1	CMV	19729	TRBV9	TRBJ1-1	5	7	HLA-A*03:01	B2M	MHCI	https://www.10xgenomics.com/resources/application-notes/a-new-way-of-exploring-immunity-linking-highly-multiplexed-antigen-recognition-to-immune-repertoire-and-phenotype/#	0	HomoSapiens	TRB
786	CSVGTGGTNEKLFF	2	2	2	NA	Human	Pathogens	Cytomegalovirus (CMV)	D003586	NA	1	Yes	pp65	P06725	TPRVTGGGAM	65748	HLA-B7	PBMC	CD8	NA	NA	NA	NA	TRBV29-1	NA	TRBJ1-4	No	TGCAGCGTTGGAACAGGAGGCACTAATGAAAAACTGTTTTTT	NA	28636589	NA	TRB	TRB	HomoSapiens	GLCTLVAML	BMLF1	EBV	2.08E+31	TRBV29-1,TRBV29-1*02	TRBJ1-4*01,TRBJ1-4	3	7	HLA-A*02:01,HLA-A*02	B2M	MHCI	PMID:27645996,PMID:12504586,PMID:28636589,PMID:29483360,PMID:23267020,PMID:19017975,https://www.10xgenomics.com/resources/application-notes/a-new-way-of-exploring-immunity-linking-highly-multiplexed-antigen-recognition-to-immune-repertoire-and-phenotype/#,https://github.com/antigenomics/vdjdb-db/issues/288,PMID:28636592,PMID:21555537,PMID:24512815,PMID:10925283	3	HomoSapiens	TRB
787	CSVGTGGTNEKLFF	2	2	2	NA	Human	Pathogens	Cytomegalovirus (CMV)	D003586	NA	1	Yes	pp65	P06725	TPRVTGGGAM	65748	HLA-B7	PBMC	CD8	NA	NA	NA	NA	TRBV29-1	NA	TRBJ1-4	No	TGCAGCGTTGGAACAGGAGGCACTAATGAAAAACTGTTTTTT	NA	28636589	NA	TRB	TRB	HomoSapiens	GLCTLVAML	BMLF1	EBV	2.08E+31	TRBV29-1,TRBV29-1*02	TRBJ1-4*01,TRBJ1-4	3	7	HLA-A*02:01,HLA-A*02	B2M	MHCI	PMID:27645996,PMID:12504586,PMID:28636589,PMID:29483360,PMID:23267020,PMID:19017975,https://www.10xgenomics.com/resources/application-notes/a-new-way-of-exploring-immunity-linking-highly-multiplexed-antigen-recognition-to-immune-repertoire-and-phenotype/#,https://github.com/antigenomics/vdjdb-db/issues/288,PMID:28636592,PMID:21555537,PMID:24512815,PMID:10925283	3	HomoSapiens	TRB
788	CSVGTGGTNEKLFF	2	2	2	NA	Human	Pathogens	Cytomegalovirus (CMV)	D003586	NA	1	Yes	pp65	P06725	TPRVTGGGAM	65748	HLA-B7	PBMC	CD8	NA	NA	NA	NA	TRBV29-1	NA	TRBJ1-4	No	TGCAGCGTTGGAACAGGAGGCACTAATGAAAAACTGTTTTTT	NA	28636589	NA	TRB	TRB	HomoSapiens	GLCTLVAML	BMLF1	EBV	2.08E+31	TRBV29-1,TRBV29-1*02	TRBJ1-4*01,TRBJ1-4	3	7	HLA-A*02:01,HLA-A*02	B2M	MHCI	PMID:27645996,PMID:12504586,PMID:28636589,PMID:29483360,PMID:23267020,PMID:19017975,https://www.10xgenomics.com/resources/application-notes/a-new-way-of-exploring-immunity-linking-highly-multiplexed-antigen-recognition-to-immune-repertoire-and-phenotype/#,https://github.com/antigenomics/vdjdb-db/issues/288,PMID:28636592,PMID:21555537,PMID:24512815,PMID:10925283	3	HomoSapiens	TRB
789	CSVGTGGTNEKLFF	2	2	2	NA	Human	Pathogens	Cytomegalovirus (CMV)	D003586	NA	1	Yes	pp65	P06725	TPRVTGGGAM	65748	HLA-B7	PBMC	CD8	NA	NA	NA	NA	TRBV29-1	NA	TRBJ1-4	No	TGCAGCGTTGGAACAGGAGGCACTAATGAAAAACTGTTTTTT	NA	28636589	NA	TRB	TRB	HomoSapiens	GLCTLVAML	BMLF1	EBV	2.08E+31	TRBV29-1,TRBV29-1*02	TRBJ1-4*01,TRBJ1-4	3	7	HLA-A*02:01,HLA-A*02	B2M	MHCI	PMID:27645996,PMID:12504586,PMID:28636589,PMID:29483360,PMID:23267020,PMID:19017975,https://www.10xgenomics.com/resources/application-notes/a-new-way-of-exploring-immunity-linking-highly-multiplexed-antigen-recognition-to-immune-repertoire-and-phenotype/#,https://github.com/antigenomics/vdjdb-db/issues/288,PMID:28636592,PMID:21555537,PMID:24512815,PMID:10925283	3	HomoSapiens	TRB
790	CSVGTGGTNEKLFF	2	2	2	NA	Human	Pathogens	Cytomegalovirus (CMV)	D003586	NA	1	Yes	pp65	P06725	TPRVTGGGAM	65748	HLA-B7	PBMC	CD8	NA	NA	NA	NA	TRBV29-1	NA	TRBJ1-4	No	TGCAGCGTTGGAACAGGAGGCACTAATGAAAAACTGTTTTTT	NA	28636589	NA	TRB	TRB	HomoSapiens	GLCTLVAML	BMLF1	EBV	2.08E+31	TRBV29-1,TRBV29-1*02	TRBJ1-4*01,TRBJ1-4	3	7	HLA-A*02:01,HLA-A*02	B2M	MHCI	PMID:27645996,PMID:12504586,PMID:28636589,PMID:29483360,PMID:23267020,PMID:19017975,https://www.10xgenomics.com/resources/application-notes/a-new-way-of-exploring-immunity-linking-highly-multiplexed-antigen-recognition-to-immune-repertoire-and-phenotype/#,https://github.com/antigenomics/vdjdb-db/issues/288,PMID:28636592,PMID:21555537,PMID:24512815,PMID:10925283	3	HomoSapiens	TRB
791	CSVGTGGTNEKLFF	2	2	2	NA	Human	Pathogens	Cytomegalovirus (CMV)	D003586	NA	1	Yes	pp65	P06725	TPRVTGGGAM	65748	HLA-B7	PBMC	CD8	NA	NA	NA	NA	TRBV29-1	NA	TRBJ1-4	No	TGCAGCGTTGGAACAGGAGGCACTAATGAAAAACTGTTTTTT	NA	28636589	NA	TRB	TRB	HomoSapiens	GLCTLVAML	BMLF1	EBV	2.08E+31	TRBV29-1,TRBV29-1*02	TRBJ1-4*01,TRBJ1-4	3	7	HLA-A*02:01,HLA-A*02	B2M	MHCI	PMID:27645996,PMID:12504586,PMID:28636589,PMID:29483360,PMID:23267020,PMID:19017975,https://www.10xgenomics.com/resources/application-notes/a-new-way-of-exploring-immunity-linking-highly-multiplexed-antigen-recognition-to-immune-repertoire-and-phenotype/#,https://github.com/antigenomics/vdjdb-db/issues/288,PMID:28636592,PMID:21555537,PMID:24512815,PMID:10925283	3	HomoSapiens	TRB
792	CSVGTGGTNEKLFF	2	2	2	NA	Human	Pathogens	Cytomegalovirus (CMV)	D003586	NA	1	Yes	pp65	P06725	TPRVTGGGAM	65748	HLA-B7	PBMC	CD8	NA	NA	NA	NA	TRBV29-1	NA	TRBJ1-4	No	TGCAGCGTTGGAACAGGAGGCACTAATGAAAAACTGTTTTTT	NA	28636589	NA	TRB	TRB	HomoSapiens	GLCTLVAML	BMLF1	EBV	2.08E+31	TRBV29-1,TRBV29-1*02	TRBJ1-4*01,TRBJ1-4	3	7	HLA-A*02:01,HLA-A*02	B2M	MHCI	PMID:27645996,PMID:12504586,PMID:28636589,PMID:29483360,PMID:23267020,PMID:19017975,https://www.10xgenomics.com/resources/application-notes/a-new-way-of-exploring-immunity-linking-highly-multiplexed-antigen-recognition-to-immune-repertoire-and-phenotype/#,https://github.com/antigenomics/vdjdb-db/issues/288,PMID:28636592,PMID:21555537,PMID:24512815,PMID:10925283	3	HomoSapiens	TRB
793	CSVGTGGTNEKLFF	2	2	2	NA	Human	Pathogens	Cytomegalovirus (CMV)	D003586	NA	1	Yes	pp65	P06725	TPRVTGGGAM	65748	HLA-B7	PBMC	CD8	NA	NA	NA	NA	TRBV29-1	NA	TRBJ1-4	No	TGCAGCGTTGGAACAGGAGGCACTAATGAAAAACTGTTTTTT	NA	28636589	NA	TRB	TRB	HomoSapiens	GLCTLVAML	BMLF1	EBV	2.08E+31	TRBV29-1,TRBV29-1*02	TRBJ1-4*01,TRBJ1-4	3	7	HLA-A*02:01,HLA-A*02	B2M	MHCI	PMID:27645996,PMID:12504586,PMID:28636589,PMID:29483360,PMID:23267020,PMID:19017975,https://www.10xgenomics.com/resources/application-notes/a-new-way-of-exploring-immunity-linking-highly-multiplexed-antigen-recognition-to-immune-repertoire-and-phenotype/#,https://github.com/antigenomics/vdjdb-db/issues/288,PMID:28636592,PMID:21555537,PMID:24512815,PMID:10925283	3	HomoSapiens	TRB
794	CSVGTGGTNEKLFF	2	2	2	NA	Human	Pathogens	Cytomegalovirus (CMV)	D003586	NA	1	Yes	pp65	P06725	TPRVTGGGAM	65748	HLA-B7	PBMC	CD8	NA	NA	NA	NA	TRBV29-1	NA	TRBJ1-4	No	TGCAGCGTTGGAACAGGAGGCACTAATGAAAAACTGTTTTTT	NA	28636589	NA	TRB	TRB	HomoSapiens	GLCTLVAML	BMLF1	EBV	2.08E+31	TRBV29-1,TRBV29-1*02	TRBJ1-4*01,TRBJ1-4	3	7	HLA-A*02:01,HLA-A*02	B2M	MHCI	PMID:27645996,PMID:12504586,PMID:28636589,PMID:29483360,PMID:23267020,PMID:19017975,https://www.10xgenomics.com/resources/application-notes/a-new-way-of-exploring-immunity-linking-highly-multiplexed-antigen-recognition-to-immune-repertoire-and-phenotype/#,https://github.com/antigenomics/vdjdb-db/issues/288,PMID:28636592,PMID:21555537,PMID:24512815,PMID:10925283	3	HomoSapiens	TRB
795	CSVGTGGTNEKLFF	2	2	2	NA	Human	Pathogens	Cytomegalovirus (CMV)	D003586	NA	1	Yes	pp65	P06725	TPRVTGGGAM	65748	HLA-B7	PBMC	CD8	NA	NA	NA	NA	TRBV29-1	NA	TRBJ1-4	No	TGCAGCGTTGGAACAGGAGGCACTAATGAAAAACTGTTTTTT	NA	28636589	NA	TRB	TRB	HomoSapiens	GLCTLVAML	BMLF1	EBV	2.08E+31	TRBV29-1,TRBV29-1*02	TRBJ1-4*01,TRBJ1-4	3	7	HLA-A*02:01,HLA-A*02	B2M	MHCI	PMID:27645996,PMID:12504586,PMID:28636589,PMID:29483360,PMID:23267020,PMID:19017975,https://www.10xgenomics.com/resources/application-notes/a-new-way-of-exploring-immunity-linking-highly-multiplexed-antigen-recognition-to-immune-repertoire-and-phenotype/#,https://github.com/antigenomics/vdjdb-db/issues/288,PMID:28636592,PMID:21555537,PMID:24512815,PMID:10925283	3	HomoSapiens	TRB
796	CSVGTGGTNEKLFF	2	2	2	NA	Human	Pathogens	Cytomegalovirus (CMV)	D003586	NA	1	Yes	pp65	P06725	TPRVTGGGAM	65748	HLA-B7	PBMC	CD8	NA	NA	NA	NA	TRBV29-1	NA	TRBJ1-4	No	TGCAGCGTTGGAACAGGAGGCACTAATGAAAAACTGTTTTTT	NA	28636589	NA	TRB	TRB	HomoSapiens	GLCTLVAML	BMLF1	EBV	2.08E+31	TRBV29-1,TRBV29-1*02	TRBJ1-4*01,TRBJ1-4	3	7	HLA-A*02:01,HLA-A*02	B2M	MHCI	PMID:27645996,PMID:12504586,PMID:28636589,PMID:29483360,PMID:23267020,PMID:19017975,https://www.10xgenomics.com/resources/application-notes/a-new-way-of-exploring-immunity-linking-highly-multiplexed-antigen-recognition-to-immune-repertoire-and-phenotype/#,https://github.com/antigenomics/vdjdb-db/issues/288,PMID:28636592,PMID:21555537,PMID:24512815,PMID:10925283	3	HomoSapiens	TRB
797	CSVGTGGTNEKLFF	2	2	2	NA	Human	Pathogens	Cytomegalovirus (CMV)	D003586	NA	1	Yes	pp65	P06725	TPRVTGGGAM	65748	HLA-B7	PBMC	CD8	NA	NA	NA	NA	TRBV29-1	NA	TRBJ1-4	No	TGCAGCGTTGGAACAGGAGGCACTAATGAAAAACTGTTTTTT	NA	28636589	NA	TRB	TRB	HomoSapiens	GLCTLVAML	BMLF1	EBV	2.08E+31	TRBV29-1,TRBV29-1*02	TRBJ1-4*01,TRBJ1-4	3	7	HLA-A*02:01,HLA-A*02	B2M	MHCI	PMID:27645996,PMID:12504586,PMID:28636589,PMID:29483360,PMID:23267020,PMID:19017975,https://www.10xgenomics.com/resources/application-notes/a-new-way-of-exploring-immunity-linking-highly-multiplexed-antigen-recognition-to-immune-repertoire-and-phenotype/#,https://github.com/antigenomics/vdjdb-db/issues/288,PMID:28636592,PMID:21555537,PMID:24512815,PMID:10925283	3	HomoSapiens	TRB
798	CSVGTGGTNEKLFF	2	2	2	NA	Human	Pathogens	Cytomegalovirus (CMV)	D003586	NA	1	Yes	pp65	P06725	TPRVTGGGAM	65748	HLA-B7	PBMC	CD8	NA	NA	NA	NA	TRBV29-1	NA	TRBJ1-4	No	TGCAGCGTTGGAACAGGAGGCACTAATGAAAAACTGTTTTTT	NA	28636589	NA	TRB	TRB	HomoSapiens	GLCTLVAML	BMLF1	EBV	2.08E+31	TRBV29-1,TRBV29-1*02	TRBJ1-4*01,TRBJ1-4	3	7	HLA-A*02:01,HLA-A*02	B2M	MHCI	PMID:27645996,PMID:12504586,PMID:28636589,PMID:29483360,PMID:23267020,PMID:19017975,https://www.10xgenomics.com/resources/application-notes/a-new-way-of-exploring-immunity-linking-highly-multiplexed-antigen-recognition-to-immune-repertoire-and-phenotype/#,https://github.com/antigenomics/vdjdb-db/issues/288,PMID:28636592,PMID:21555537,PMID:24512815,PMID:10925283	3	HomoSapiens	TRB
799	CSVGTGGTNEKLFF	2	2	2	NA	Human	Pathogens	Cytomegalovirus (CMV)	D003586	NA	1	Yes	pp65	P06725	TPRVTGGGAM	65748	HLA-B7	PBMC	CD8	NA	NA	NA	NA	TRBV29-1	NA	TRBJ1-4	No	TGCAGCGTTGGAACAGGAGGCACTAATGAAAAACTGTTTTTT	NA	28636589	NA	TRB	TRB	HomoSapiens	DPFRLLQNSQVFS	NP	InfluenzaA	0	TRBV29-1	TRBJ1-4	3	7	HLA-DRA*01	HLA-DRB1*01	MHCII	https://github.com/antigenomics/vdjdb-db/issues/291	0	HomoSapiens	TRB
800	CSVGTGGTNEKLFF	2	2	2	NA	Human	Pathogens	Cytomegalovirus (CMV)	D003586	NA	1	Yes	pp65	P06725	TPRVTGGGAM	65748	HLA-B7	PBMC	CD8	NA	NA	NA	NA	TRBV29-1	NA	TRBJ1-4	No	TGCAGCGTTGGAACAGGAGGCACTAATGAAAAACTGTTTTTT	NA	28636589	NA	TRB	TRB	HomoSapiens	DPFRLLQNSQVFS	NP	InfluenzaA	0	TRBV29-1	TRBJ1-4	3	7	HLA-DRA*01	HLA-DRB1*01	MHCII	https://github.com/antigenomics/vdjdb-db/issues/291	0	HomoSapiens	TRB
801	CSVGTGGTNEKLFF	2	2	2	NA	Human	Pathogens	Cytomegalovirus (CMV)	D003586	NA	1	Yes	pp65	P06725	TPRVTGGGAM	65748	HLA-B7	PBMC	CD8	NA	NA	NA	NA	TRBV29-1	NA	TRBJ1-4	No	TGCAGCGTTGGAACAGGAGGCACTAATGAAAAACTGTTTTTT	NA	28636589	NA	TRB	TRB	HomoSapiens	DPFRLLQNSQVFS	NP	InfluenzaA	0	TRBV29-1	TRBJ1-4	3	7	HLA-DRA*01	HLA-DRB1*01	MHCII	https://github.com/antigenomics/vdjdb-db/issues/291	0	HomoSapiens	TRB
802	CSVGTGGTNEKLFF	2	2	2	NA	Human	Pathogens	Cytomegalovirus (CMV)	D003586	NA	1	Yes	pp65	P06725	TPRVTGGGAM	65748	HLA-B7	PBMC	CD8	NA	NA	NA	NA	TRBV29-1	NA	TRBJ1-4	No	TGCAGCGTTGGAACAGGAGGCACTAATGAAAAACTGTTTTTT	NA	28636589	NA	TRB	TRB	HomoSapiens	DPFRLLQNSQVFS	NP	InfluenzaA	0	TRBV29-1	TRBJ1-4	3	7	HLA-DRA*01	HLA-DRB1*01	MHCII	https://github.com/antigenomics/vdjdb-db/issues/291	0	HomoSapiens	TRB
803	CSVGTGGTNEKLFF	2	2	2	NA	Human	Pathogens	Cytomegalovirus (CMV)	D003586	NA	1	Yes	pp65	P06725	TPRVTGGGAM	65748	HLA-B7	PBMC	CD8	NA	NA	NA	NA	TRBV29-1	NA	TRBJ1-4	No	TGCAGCGTTGGAACAGGAGGCACTAATGAAAAACTGTTTTTT	NA	28636589	NA	TRB	TRB	HomoSapiens	DPFRLLQNSQVFS	NP	InfluenzaA	0	TRBV29-1	TRBJ1-4	3	7	HLA-DRA*01	HLA-DRB1*01	MHCII	https://github.com/antigenomics/vdjdb-db/issues/291	0	HomoSapiens	TRB
804	CSVGTGGTNEKLFF	2	2	2	NA	Human	Pathogens	Cytomegalovirus (CMV)	D003586	NA	1	Yes	pp65	P06725	TPRVTGGGAM	65748	HLA-B7	PBMC	CD8	NA	NA	NA	NA	TRBV29-1	NA	TRBJ1-4	No	TGCAGCGTTGGAACAGGAGGCACTAATGAAAAACTGTTTTTT	NA	28636589	NA	TRB	TRB	HomoSapiens	DPFRLLQNSQVFS	NP	InfluenzaA	0	TRBV29-1	TRBJ1-4	3	7	HLA-DRA*01	HLA-DRB1*01	MHCII	https://github.com/antigenomics/vdjdb-db/issues/291	0	HomoSapiens	TRB
805	CSVGTGGTNEKLFF	2	2	2	NA	Human	Pathogens	Cytomegalovirus (CMV)	D003586	NA	1	Yes	pp65	P06725	TPRVTGGGAM	65748	HLA-B7	PBMC	CD8	NA	NA	NA	NA	TRBV29-1	NA	TRBJ1-4	No	TGCAGCGTTGGAACAGGAGGCACTAATGAAAAACTGTTTTTT	NA	28636589	NA	TRB	TRB	HomoSapiens	DPFRLLQNSQVFS	NP	InfluenzaA	0	TRBV29-1	TRBJ1-4	3	7	HLA-DRA*01	HLA-DRB1*01	MHCII	https://github.com/antigenomics/vdjdb-db/issues/291	0	HomoSapiens	TRB
806	CSVGTGGTNEKLFF	2	2	2	NA	Human	Pathogens	Cytomegalovirus (CMV)	D003586	NA	1	Yes	pp65	P06725	TPRVTGGGAM	65748	HLA-B7	PBMC	CD8	NA	NA	NA	NA	TRBV29-1	NA	TRBJ1-4	No	TGCAGCGTTGGAACAGGAGGCACTAATGAAAAACTGTTTTTT	NA	28636589	NA	TRB	TRB	HomoSapiens	DPFRLLQNSQVFS	NP	InfluenzaA	0	TRBV29-1	TRBJ1-4	3	7	HLA-DRA*01	HLA-DRB1*01	MHCII	https://github.com/antigenomics/vdjdb-db/issues/291	0	HomoSapiens	TRB
807	CSVGTGGTNEKLFF	2	2	2	NA	Human	Pathogens	Cytomegalovirus (CMV)	D003586	NA	1	Yes	pp65	P06725	TPRVTGGGAM	65748	HLA-B7	PBMC	CD8	NA	NA	NA	NA	TRBV29-1	NA	TRBJ1-4	No	TGCAGCGTTGGAACAGGAGGCACTAATGAAAAACTGTTTTTT	NA	28636589	NA	TRB	TRB	HomoSapiens	DPFRLLQNSQVFS	NP	InfluenzaA	0	TRBV29-1	TRBJ1-4	3	7	HLA-DRA*01	HLA-DRB1*01	MHCII	https://github.com/antigenomics/vdjdb-db/issues/291	0	HomoSapiens	TRB
808	CSVGTGGTNEKLFF	2	2	2	NA	Human	Pathogens	Cytomegalovirus (CMV)	D003586	NA	1	Yes	pp65	P06725	TPRVTGGGAM	65748	HLA-B7	PBMC	CD8	NA	NA	NA	NA	TRBV29-1	NA	TRBJ1-4	No	TGCAGCGTTGGAACAGGAGGCACTAATGAAAAACTGTTTTTT	NA	28636589	NA	TRB	TRB	HomoSapiens	DPFRLLQNSQVFS	NP	InfluenzaA	0	TRBV29-1	TRBJ1-4	3	7	HLA-DRA*01	HLA-DRB1*01	MHCII	https://github.com/antigenomics/vdjdb-db/issues/291	0	HomoSapiens	TRB
809	CSVGTGGTNEKLFF	2	2	2	NA	Human	Pathogens	Cytomegalovirus (CMV)	D003586	NA	1	Yes	pp65	P06725	TPRVTGGGAM	65748	HLA-B7	PBMC	CD8	NA	NA	NA	NA	TRBV29-1	NA	TRBJ1-4	No	TGCAGCGTTGGAACAGGAGGCACTAATGAAAAACTGTTTTTT	NA	28636589	NA	TRB	TRB	HomoSapiens	DPFRLLQNSQVFS	NP	InfluenzaA	0	TRBV29-1	TRBJ1-4	3	7	HLA-DRA*01	HLA-DRB1*01	MHCII	https://github.com/antigenomics/vdjdb-db/issues/291	0	HomoSapiens	TRB
810	CSVGTGGTNEKLFF	2	2	2	NA	Human	Pathogens	Cytomegalovirus (CMV)	D003586	NA	1	Yes	pp65	P06725	TPRVTGGGAM	65748	HLA-B7	PBMC	CD8	NA	NA	NA	NA	TRBV29-1	NA	TRBJ1-4	No	TGCAGCGTTGGAACAGGAGGCACTAATGAAAAACTGTTTTTT	NA	28636589	NA	TRB	TRB	HomoSapiens	DPFRLLQNSQVFS	NP	InfluenzaA	0	TRBV29-1	TRBJ1-4	3	7	HLA-DRA*01	HLA-DRB1*01	MHCII	https://github.com/antigenomics/vdjdb-db/issues/291	0	HomoSapiens	TRB
811	CSVGTGGTNEKLFF	2	2	2	NA	Human	Pathogens	Cytomegalovirus (CMV)	D003586	NA	1	Yes	pp65	P06725	TPRVTGGGAM	65748	HLA-B7	PBMC	CD8	NA	NA	NA	NA	TRBV29-1	NA	TRBJ1-4	No	TGCAGCGTTGGAACAGGAGGCACTAATGAAAAACTGTTTTTT	NA	28636589	NA	TRB	TRB	HomoSapiens	DPFRLLQNSQVFS	NP	InfluenzaA	0	TRBV29-1	TRBJ1-4	3	7	HLA-DRA*01	HLA-DRB1*01	MHCII	https://github.com/antigenomics/vdjdb-db/issues/291	0	HomoSapiens	TRB
[truncated: 32 more columns]
