# Supplementary material for: Candidate HPV-Specific T-Cells Expand in the Tumor Microenvironment During Chemoradiotherapy
Source: Research Square preprint supplement (doi:10.21203/rs.3.rs-105933/v1), 2021-03-16
Supplement: Supplementary file 9 [file 6e0af2e959ea00eb278eb318.xlsx]

## Sheet: Sheet1
	Blood Samples						Tumor Samples
Flow Variables	Baseline	Week 1	Week 3	Week 5	Week 12		Baseline	Week 1	Week 3	Week 5	Week 12
CD11b+CD11c- (% Live Lymphocytes)	8.88583	6.9975	8.31333	14.241	10.0344		12.25	14.707	25.6111	28.7543	6.805
CD11b+CD11c-CD40+	22.3655	8.81167	4.99*	5.0707	26.1022		10.375	21.5235	4.75	8.1085	16.395
CD11b+CD11c-CD40+ (% Live Lymphocytes)	1.78791	0.632333	0.18*	0.321049	1.80022		0.4792	1.0855	0.929004	2.04971	1.20482
CD11b+CD11c-CD86+	0.994167	0.829583	1.44175	1.5898	2.07222		2.9729	3.065	1.60702	2.02343	12.5033
CD11b+CD11c-CD86+ (% Live Lymphocytes)	0.108417	0.065345	0.0652808	0.155732	0.105436		0.249009	0.2846	0.341792	0.987286	0.520833
CD11b+CD40+ (% Live Lymphocytes)	6.91636	10.4942	14.2947	23.698	1.87*		4.6367	4.0078	6.13747	1.25683	0.748333
CD11b+CD86+ (% Live Lymphocytes)	4.206	5.58042	11.28*	9.76*	6.02711		1.4365	1.714	1.26011	0.325143	0.8395
CD11c+CD11b+ (% Live Lymphocytes)	10.5758	16.52*	26.19*	33.5*	12		4.0819	5.0925	6.34877	2.29843	0.592667
CD11c+CD11b- (% Live Lymphocytes)	1.67917	2.34917	2.28417	3.94*	4.39111		5.0899	3.5368	6.32933	2.48143	0.686
CD11c+CD11b+CD40+	35.55	35.8983	13.0958	15.533	17.8211		17.369	27.865	20.7111	21.2633	2.38333
CD11c+CD11b-CD40+ (% Live Lymphocytes)	3.16809	5.87775	2.9175	3.065	0.804444		0.148609	0.351897	0.252307	0.293517	0.00110667
CD11c+CD11b+CD40+ (% Live Lymphocytes)	0.356455	0.705417	0.274833	0.5073	0.507556		0.4216	0.641815	0.511227	0.368333	0.08222
CD11c+CD11b-CD40+	24.0655	25.5658	14.4433	12.165	22.4744		25.648	16.067	16.1378	16.8867	7.24167
CD11c+CD11b+CD86+	29.5529	25.0825	28.5742	24.215	25.3922		9.707	9.712	10.9056	12.4857	11.2667
CD11c+CD11b+CD86+ (% Live Lymphocytes)	3.31019	3.91117	8.47*	6.803	4.426		0.2224	0.109961	0.155556	0.182014	0.0413133
CD11c+CD11b-CD86+ (% Live Lymphocytes)	0.67375	0.676167	0.791833	0.9306	1.014		3.3771	1.97583	0.150667	0.325714	0.330833
CD11c+CD11b-CD86+	40.1058	32.9908	39.7692	31.019	28.9211		25.253	26.966	11.2244	15.2429	22.85
CD11c+CD40+ (% Live Lymphocytes)	6.34727	7.15417	15.0907	23.26*	2.12556		2.0611	1.2565	2.72711	0.716667	0.04*
CD11c+CD86+ (% Live Lymphocytes)	3.374	6.29167	11.7675	10.321	7.18667		3.69419	2.2624	2.03067	0.729857	0.1665
CD11c+HLA-DR+ DC (% Live Lymphocytes)	15.0114	26.0138	34.65	15.8742	42		8.51778	13.126	9.81833	8.80444	12.0467
CD11c+HLA-DR+CD141+ DC (% Live Lymphocytes)	6.28333	15.3575	10.56	4.71665	42		0.5557	1.6575	3.91*	3.902	1.01*
CD3+ (% Live Lymphocytes)	55.5376	50.0719	42.3344	37.114	46.6		16.4856	12.7622	13.5969	21.2006	13.76*
CD3+ Counts	45677.1	35456.8	20,071.04*	16,728.4*	26,375.17*		13071.1	10037.9	4,078.05*	5,275.14*	1,547.9*
CD3-CD11b+CD11c-	23.3792	14.8767	13.94*	20.062	19.5156		16.58	21.202	28.4411	33.5186	7.94333
CD3-CD11b+CD40+	17.3718	21	25.2875	34.267	3.36*		5.479	6.0343	7.19636	1.62017	0.805
CD3-CD11b+CD86+	10.1707	11.57	19.8492	14.209	8.88		1.752	2.0085	1.50233	0.392	0.903167
CD3-CD11c+CD11b+	26.5933	33.8267	47.81*	48.68*	20.3089		4.8957	6.4065	7.84878	2.69014	0.612833
CD3-CD11c+CD11b-	4.1875	5.03083	4.88833	6.291	7.82556		5.9189	6.7937	6.76822	3.04857	0.731167
CD3-CD11c+CD40+	15.4955	14.5708	28.07	34.143	4.17333		2.6031	1.72985	3.265	0.8715	0.05*
CD3-CD11c+CD86+	8.3925	13.1833	20.7417	15.602	10.86		4.0698	2.4415	2.22733	0.893	0.171833
CD4+ (% CD3+)	57.0897	61.8906	59.6046	62.28	53.27*		39.4008	36.4876	46.0032	50.66*	32.94*
CD4+ (% Live Lymphocytes)	32.2638	31.075	26.65*	23.45*	23.95*		7.28529	5.61502	6.66164	11.2352	4.94945
CD4+CD69+ (% Live Lymphocytes)	0.416241	1.11466	1.43565	0.79232	0.472056		1.50303	0.809882	2.24537	4.04*	1.96225
CD4+CTLA4+ (% Live Lymphocytes)	3.35307	2.53028	1.62195	1.46356	0.412056		1.12093	0.55*	1.31503	1.97942	1.26174
CD4+Foxp3+ (% Live Lymphocytes)	2.86472	1.50313	1.49742	2.2216	1.02061		0.85417	0.433882	0.93543	1.67389	0.840498
CD4+GrzB+(% Live Lymphocytes)	1.38958	2.78	1.771	1.008	0.614556		1.3519	0.512161	0.64548	0.577857	0.224653
CD4+IFNg+ (% Live Lymphocytes)	0.0823407	0.265215	0.225365	0.30968	0.0729072		0.953596	0.144088	0.208925	0.258689	0.198944
CD4+Ki-67+ (% Live Lymphocytes)	3.267	3.51866	1.05861	2.04309	0.356556		1.28801	0.487052	0.348937	0.898717	0.243653
CD4+PD1+ (% Live Lymphocytes)	0.763276	1.83978	1.45104	0.635625	0.5679		2.55648	2.17672	2.58562	2.48882	0.578198
CD69+ (% CD4+)	1.34224	3.74375	5.84923	4.442	2.09556		25.1496	26.2018	35.11*	33.7582	37.623
CD69+ (% CD8+)	5.15448	7.86062	12.6888	12.59*	8.63278		46.461	45.1708	49.0318	60.3029	58.3075
CD8+ (% CD3+)	28.2069	24.4794	23.27*	23.0796	28.556		28.679	18.21*	17.07*	22.88	20.8415
CD8+ (% Live Lymphocytes)	16.5121	12.65*	9.54*	8.76*	13.8486		5.41744	2.99*	2.45*	5.36312	3.9497
CD8+CD69+ (% Live Lymphocytes)	0.750276	0.950688	3.21857	1.26002	0.745634		2.42221	0.92*	0.950579	2.45318	2.2151
CD8+CTLA4+ (% Live Lymphocytes)	1.71231	0.968156	2.13382	0.55516	0.261444		0.701477	0.237896	0.221323	0.672918	0.375957
CD8+GrnzB+ (% Live Lymphocytes)	5.6469	4.23175	3.50*	3.15*	5.77556		1.9597	1.07266	1.01513	1.83682	1.11987
CD8+IFNg+ (% Live) (Peptide-Media)	0.0372447	0.132557	0.0400436	0.028982	0.008288		0.0202252	0.0210786	0.00365305	0.00572841	0.1302
CD8+IFNg+ (% Live Lymphocytes)	0.0838466	0.122597	0.122402	0.0966708	0.0389561		0.126109	0.0705165	0.0328247	0.396838	0.341093
CD8+Ki-67+ (% Live Lymphocytes)	1.78561	0.704911	0.597571	0.660317	0.161079		0.327988	0.193496	0.237445	0.494431	0.351428
CD8+PD1+ (% Live Lymphocytes)	0.406787	0.485653	0.646803	0.197667	0.195255		1.8766	0.839678	1.01259	1.40779	0.315657
CTLA4+ (% CD4+)	12.19	9.51	8.64	6.68	1.65		23.35	21.22	21.12	21.52	27.81
CTLA4+ (% CD8+)	11.13	9.82	11.89*	9.36	1.76		19.17	16.17	17.42	14.88	15.61
FoxP3+ (% CD4+)	9.32	5.05	8.76	10.78	4.6		16.1	13.18	16.42	17.47	19.55
GrzB+ (% CD8+)	31.46	30.4	34.09	33.46	30.97		35.75	30.41	39.92	35.74	34.83
GrzB+ (% CD4+)	4.07333	10.73	6.50*	5.454	3.10222		27.242	15.605	25.4	5.78714	22.54
HLA-DR-CD11b+CD33+ MDSC (% Live Lymphocytes)	9.02143	6.63875	10.98	15.4025	42		57.2489	44.73	67.3833	46.1244	43.9333
IFNg+ (% CD4+)	0.315586	0.800594	0.749615	1.48332	0.38131		12.1226	11.7961	6.91121	2.36076	9.65*
IFNg+ (% CD8+)	0.535365	1.05647	0.512577	0.82328	2.16689		10.2733	9.02216	4.82364	5.23553	12.312
IFNg+ (% CD8+) (Peptide-Media)	0.433731	1.88245	0.501429	0.4132	0.0692		1.35338	0.67713	1.34314	1.44259	5.153
Ki67+ (% CD4+)	12.31	13.08	7.04	11.3	1.54		21.39	11.29	10.19	12.33	8.44
Ki67+ (% CD8+)	9.66	7.56	7.84*	11.31*	2.93		19.68	15.7	10.79	14.91	9.93
Live	91.425	86.175	82.65*	89.69	90.0778		64.35	57.565	47.26	48.4571	58.7333
Live Lymphocytes Count	106135	86925.3	54,876.75*	78750.9	57849.3		79998.9	14412.1	35872.7	21587	7990.83
PD1+ (% CD4+)	2.56	4.28	4.72	4.65	2.97		29.43	26.22	31.26	21.47	13.07*
PD1+ (% CD8+)	2.54	4.5	6.54	2.94	2.12		33.59	30.12	35.5	30.17	8.64*
Significance calculated using a paired t-test
* Significant P-value at ɑ=0.05
Means are presented
TCR Variables	Baseline	Week 1	Week 3	Week 5	Week 12		Baseline	Week 1	Week 3	Week 5	Week 12
Max Frequency	0.02	0.03	0.03	0.028	0.03		0.02	0.02	0.02	0.02	0.03
Max Productive Frequency	0.02	0.03	0.03	0.03	0.03		0.02	0.02	0.02	0.02	0.04
Outofframe Rearrangements	5566	3588+	2853+	2141.5+	2418.5+		573	310+	305+	337+	144
Outofframe Templates	8052	5565+	3712.5+	3009+	4340.5		948	398+	364+	397+	156
Productive Clonality	0.05	0.06	0.08	0.076	0.1		0.06	0.03+	0.03+	0.03+	0.03+
Productive Entropy	13.54	12.81+	12.58+	12.20+	11.97+		10.49	9.91+	9.77+	10.22+	8.53
Productive Rearrangements	29980.5	17173+	13103+	9937.5+	10943+		2855	1463+	1214+	1508+	610.5
Productive Templates	40138	24091+	18027.5+	14984+	19177.5		4406	2068+	1567+	1877+	752
Sample Entropy	13.73	13.13+	12.83+	12.50+	12.21+		10.83	10.15+	10.09+	10.53+	8.98
Total Rearrangements	35593.5	20708+	16243+	12307+	13598.5+		3463.5	1836+	1595+	1850+	772.5
Total Templates	48076.5	28087+	21572+	18233+	23814.5		5573	2586+	1983+	2275+	928.5
Significance calculated using a paired Wilcoxon test
+ Significant P-value at ɑ=0.05
Medians are presented
