# Supplementary material for: Candidate HPV-Specific T-Cells Expand in the Tumor Microenvironment During Chemoradiotherapy
Source: Research Square preprint supplement (doi:10.21203/rs.3.rs-105933/v1), 2021-03-16
Supplement: Supplementary file 10 [file 73b2eb85315c3e65972d5831.xlsx]

## Sheet: Full analysis
		Baseline							Week 1							Week 3							Week 5							Week 12									Baseline								Week 1
		OS				RFS			OS				RFS			OS				RFS			OS				RFS			OS				RFS					OS				RFS				OS
	Flow Variable	HR	95% CI	P		HR	95% CI	P	HR	95% CI	P		HR	95% CI	P	HR	95% CI	P		HR	95% CI	P	HR	95% CI	P		HR	95% CI	P	HR	95% CI	P		HR	95% CI	P			HR	95% CI	P		HR	95% CI	P		HR	95% CI	P
Blood Samples	CD11b+CD11c- (% Live Lymphocytes)	0.625958	(0.16-0.88)	0.495078		1.06806	(-0.18-0.31)	0.596977	0.837038	(0.38-1.85)	0.6598		0.999976	(1-1)	0.201344	1.07926	(0.55-2.1)	0.822278		0.969584	(0.85-1.11)	0.64719	0.999156	(0.88-1.13)	0.98913		0.967466	(1-1)	0.446029	NA	(NA-NA)	NA		1.04454	(0.93-1.17)	0.4493		Tumor Samples	0.535097	(0.08-3.63)	0.521848		1.03885	(0.93-1.16)	0.509986		0.6376	(0.15-2.79)	0.550435
	CD11b+CD11c-CD40+	0.894042	(0.68-0.16)	0.411934		0.927617	(-0.19-0.04)	0.209088	1.16302	(0.84-1.61)	0.365823		0.837038	(0.38-1.85)	0.6598	0.926504	(0.54-1.58)	0.778184		0.939077	(0.75-1.18)	0.584225	1.01002	(0.77-1.32)	0.942309		0.965473	(0.96-1.03)	0.693271	NA	(NA-NA)	NA		0.99264	(0.95-1.04)	0.744686			1.7733	(—Inf-Inf)	0.999938		1.08632	(0.98-1.21)	0.1316		3.03718	(—Inf-Inf)	0.999157
	CD11b+CD11c-CD40+ (% Live Lymphocytes)	0.19502	(0-2.53)	0.441863		0.647657	(-1.4-0.53)	0.376419	2013.1	(0-42676590537)	0.376771		1.16302	(0.84-1.61)	0.365823	0.247413	(0-152053.29)	0.837273		0.0994367	(0-112.54)	0.519971	10.0699	(0.09-1153.55)	0.339693		0.67101	(0.98-1.17)	0.7956	NA	(NA-NA)	NA		0.888275	(0.48-1.65)	0.708547			1.62601e+23	(—Inf-Inf)	0.99937		19.2348	(1.42-260.36)	0.0261286		1.91728	(0.43-8.48)	0.391007
	CD11b+CD11c-CD86+	1.14711	(0.05-3.19)	0.92977		0.688742	(-1.99-1.25)	0.651731	1.54123	(0.02-105.41)	0.840964		2013.1	(0-42676590537)	0.376771	0.512856	(0.05-5.5)	0.581051		0.848837	(0.41-1.76)	0.658776	1.07098	(0.47-2.44)	0.870468		1.18716	(0.77-1.13)	0.411718	NA	(NA-NA)	NA		1.08042	(0.73-1.61)	0.702119			493.314	(—Inf-Inf)	0.999428		1.14047	(0.9-1.44)	0.268744		1.20714	(0.76-1.91)	0.420858
	CD11b+CD11c-CD86+ (% Live Lymphocytes)	0.000629221	(0-26.61)	0.670719		1.81494	(-9.04-10.23)	0.903525	0.00108795	(0-9.05177349874059E+32)	0.871545		1.54123	(0.02-105.41)	0.840964	2.59353e-06	(0-1.74842069934134E+21)	0.683207		0.000326976	(0-3461525.65)	0.495583	40471.6	(0-21820307993123.9)	0.301069		0.571237	(0.27-71.57)	0.814747	NA	(NA-NA)	NA		537.854	(0.09-3046045.02)	0.153859			3.44841	(0-4147.6)	0.73228		3.50982	(0.13-97.77)	0.459511		0.585073	(0-187.79)	0.855557
	CD11b+CD40+ (% Live Lymphocytes)	0.373704	(0.01-3.22)	0.646251		1.07042	(-0.08-0.22)	0.382953	0.970964	(0.81-1.16)	0.746289		0.00108795	(0-9.05177349874059E+32)	0.871545	0.697678	(0.28-1.76)	0.445901		1.01815	(0.96-1.07)	0.515503	0.888044	(0.59-1.33)	0.563088		1.01704	(0.24-3.42)	0.515553	NA	(NA-NA)	NA		1.18207	(0.74-1.9)	0.487542			0.00178924	(0-121691.95)	0.491787		1.03035	(0.86-1.23)	0.743997		7.14218e-08	(0-1.10723669769586E+23)	0.642698
	CD11b+CD86+ (% Live Lymphocytes)	1.00185	(0.69-0.38)	0.992332		1.09296	(-0.06-0.24)	0.247356	0.75227	(0.31-1.8)	0.521923		0.970964	(0.81-1.16)	0.746289	0.969127	(0.79-1.18)	0.759529		1.03656	(0.95-1.13)	0.419379	0.925661	(0.64-1.33)	0.676663		0.940507	(0.85-9.58)	0.436355	NA	(NA-NA)	NA		1.05222	(0.95-1.16)	0.31841			0.282612	(0-450.71)	0.73698		0.877557	(0.54-1.43)	0.601679		0.0040637	(0-2291.34)	0.415149
	CD11c+CD11b+ (% Live Lymphocytes)	1.11232	(0.77-0.47)	0.569163		1.1286	(-0.07-0.31)	0.205894	1.04417	(0.89-1.23)	0.598693		0.75227	(0.31-1.8)	0.521923	1.14524	(0.85-1.54)	0.374517		1.06469	(0.98-1.16)	0.132766	0.938323	(0.81-1.08)	0.387872		1.0059	(0.7-1.69)	0.854794	NA	(NA-NA)	NA		1.06457	(0.96-1.19)	0.253352			0.629159	(0.07-5.78)	0.682215		1.02677	(0.91-1.15)	0.656132		0.810279	(0.19-3.37)	0.772331
	CD11c+CD11b- (% Live Lymphocytes)	0.619142	(0.04-2.15)	0.721184		1.69894	(-0.84-1.9)	0.449837	1.0091	(0.52-1.95)	0.978528		1.04417	(0.89-1.23)	0.598693	0.59237	(0.1-3.59)	0.569032		1.04538	(0.53-2.05)	0.8975	0.617141	(0.14-2.77)	0.529016		1.19354	(0.7-7.06)	0.311024	NA	(NA-NA)	NA		0.743215	(0.34-1.61)	0.450299			2.89471	(—Inf-Inf)	0.999952		1.20873	(0.9-1.62)	0.203551		11.7368	(—Inf-Inf)	0.999806
	CD11c+CD11b+CD40+	0.89584	(0.65-0.21)	0.499651		0.989829	(-0.05-0.03)	0.622353	1.03202	(0.95-1.12)	0.430501		1.0091	(0.52-1.95)	0.978528	0.991349	(0.83-1.19)	0.925038		0.947659	(0.84-1.07)	0.386768	1.00797	(0.93-1.09)	0.844188		0.976664	(0.42-7.98)	0.500895	NA	(NA-NA)	NA		0.844091	(0.63-1.13)	0.248571			1.05423	(0.95-1.17)	0.305955		1.01152	(0.97-1.06)	0.623902		1.04291	(0.96-1.13)	0.300651
	CD11c+CD11b-CD40+ (% Live Lymphocytes)	0.773808	(0.19-1.14)	0.718242		0.979919	(-0.28-0.23)	0.876072	1.08621	(0.91-1.3)	0.358607		1.03202	(0.95-1.12)	0.430501	1.6366	(0.63-4.27)	0.314059		0.959013	(0.67-1.38)	0.822661	1.23545	(0.51-3.02)	0.643188		0.935233	(0.26-128883.95)	0.696279	NA	(NA-NA)	NA		0.817407	(0.1-6.38)	0.847515			1.99577	(0-1457.63)	0.83725		0.493476	(0.01-44.07)	0.757953		5.68377	(0.17-190.09)	0.331892
	CD11c+CD11b+CD40+ (% Live Lymphocytes)	0.139611	(0-6.84)	0.661474		2.31721	(-3.25-4.93)	0.686859	1.93359	(0.41-9.03)	0.401565		1.08621	(0.91-1.3)	0.358607	0.623587	(0-24082.31)	0.930162		0.987156	(0.01-145.01)	0.995948	0.0336308	(0-122269.96)	0.659839		1.75913	(0.91-1.07)	0.278742	NA	(NA-NA)	NA		0.465339	(0.03-7.44)	0.588507			0.000384318	(0-1876026.45)	0.489624		0.366847	(0.02-8.07)	0.524896		1.02037	(0.25-4.14)	0.977481
	CD11c+CD11b-CD40+	0.966035	(0.84-0.1)	0.617923		0.978023	(-0.1-0.06)	0.58244	3.34932	(—Inf-Inf)	0.999296		1.93359	(0.41-9.03)	0.401565	1.07592	(0.79-1.47)	0.648982		0.967946	(0.84-1.11)	0.650854	0.987384	(0.73-1.34)	0.935759		1.01811	(0.96-1.03)	0.792616	NA	(NA-NA)	NA		1.01558	(0.97-1.06)	0.48011			0.0302141	(—Inf-Inf)	0.998017		0.951009	(0.88-1.03)	0.233171		0.884286	(0.6-1.31)	0.536487
	CD11c+CD11b+CD86+	0.997161	(0.93-0.07)	0.934873		1.01817	(-0.01-0.05)	0.280551	0.909258	(0.7-1.19)	0.484943		3.34932	(—Inf-Inf)	0.999296	0.980664	(0.88-1.1)	0.729226		1.01408	(0.98-1.05)	0.453928	1.02852	(0.95-1.12)	0.504155		0.982569	(1.06-13.49)	0.505615	NA	(NA-NA)	NA		1.01185	(0.97-1.06)	0.616331			4.619	(—Inf-Inf)	0.999531		1.04352	(0.97-1.12)	0.223365		0.991791	(0.84-1.17)	0.923334
	CD11c+CD11b+CD86+ (% Live Lymphocytes)	1.0487	(0.68-0.49)	0.832031		1.15499	(-0.04-0.33)	0.135182	0.837739	(0.34-2.09)	0.704693		0.909258	(0.7-1.19)	0.484943	0.994489	(0.79-1.25)	0.962435		1.04651	(0.94-1.17)	0.409922	1.00916	(0.78-1.31)	0.94601		0.942701	(0.7-1.33)	0.511896	NA	(NA-NA)	NA		1.07224	(0.96-1.2)	0.210573			0.904423	(0-257.06)	0.972199		1.63735	(0.16-16.6)	0.676516		0.240579	(0-15057394.86)	0.876391
	CD11c+CD11b-CD86+ (% Live Lymphocytes)	1.37522	(0.14-2.64)	0.787868		2.61541	(-0.25-2.18)	0.120886	1.57649	(0.26-9.56)	0.620605		0.837739	(0.34-2.09)	0.704693	0.83526	(0.06-12.47)	0.896168		2.27437	(0.66-7.84)	0.193102	3.64066	(0.06-226.31)	0.539707		1.79497	(0.92-12.71)	0.437236	NA	(NA-NA)	NA		0.534872	(0.11-2.59)	0.437039			2.63543	(—Inf-Inf)	0.999964		1.22476	(0.78-1.93)	0.380876		5.0536	(—Inf-Inf)	0.999965
	CD11c+CD11b-CD86+	1.01709	(0.96-0.07)	0.564463		1.02209	(-0.01-0.05)	0.172421	1.02274	(0.94-1.12)	0.616892		1.57649	(0.26-9.56)	0.620605	1.00738	(0.94-1.08)	0.834794		1.01961	(0.98-1.06)	0.301229	1.09316	(0.9-1.33)	0.376741		0.994679	(0.63-1.14)	0.800189	NA	(NA-NA)	NA		1.00171	(0.94-1.06)	0.956237			1.527	(—Inf-Inf)	0.999833		1.0231	(0.98-1.07)	0.282833		1.07196	(0.86-1.33)	0.531448
	CD11c+CD40+ (% Live Lymphocytes)	0.718845	(0.15-1.23)	0.677594		1.09873	(-0.07-0.26)	0.267066	0.96491	(0.75-1.25)	0.783749		1.02274	(0.94-1.12)	0.616892	0.915321	(0.68-1.22)	0.550161		1.02122	(0.96-1.08)	0.46945	0.952475	(0.83-1.1)	0.498633		1.02398	(0.48-3.84)	0.414324	NA	(NA-NA)	NA		1.21984	(0.69-2.16)	0.496807			0.532651	(0.06-4.98)	0.5807		0.789519	(0.43-1.44)	0.438828		1.86357e+31	(—Inf-Inf)	0.998228
	CD11c+CD86+ (% Live Lymphocytes)	1.08511	(0.68-0.54)	0.729499		1.05433	(-0.2-0.31)	0.683916	0.90381	(0.54-1.51)	0.701153		0.96491	(0.75-1.25)	0.783749	0.974431	(0.81-1.17)	0.78608		1.03608	(0.95-1.13)	0.406326	0.990155	(0.72-1.37)	0.951918		0.959316	(0.32-21.45)	0.606465	NA	(NA-NA)	NA		1.04081	(0.95-1.15)	0.415547			7.7742	(—Inf-Inf)	0.999811		1.12542	(0.97-1.31)	0.126601		39.8471	(—Inf-Inf)	0.999797
	CD11c+HLA-DR+ DC (% Live Lymphocytes)	6.24534	(—Inf-Inf)	0.99969		19.9332	(—Inf-Inf)	0.99954	1738.29	(—Inf-Inf)	0.999321		0.90381	(0.54-1.51)	0.701153	NA	(NA-NA)	NA		NA	(NA-NA)	NA	NA	(NA-NA)	NA		NA	(2.5-37394635.13)	NA	NA	(NA-NA)	NA		2.23534e-05	(—Inf-Inf)	0.999579			6.24534	(—Inf-Inf)	0.99969		19.9332	(—Inf-Inf)	0.99954		1738.29	(—Inf-Inf)	0.999321
	CD11c+HLA-DR+CD141+ DC (% Live Lymphocytes)	1.49903e-69	(—Inf-Inf)	0.99772		2.00494e-69	(—Inf-Inf)	0.997687	0.350703	(0-24106.31)	0.853712		1738.29	(—Inf-Inf)	0.999321	NA	(NA-NA)	NA		NA	(NA-NA)	NA	NA	(NA-NA)	NA		NA	(0.96-1.05)	NA	NA	(NA-NA)	NA		2.80623e-58	(—Inf-Inf)	0.999579			1.49903e-69	(—Inf-Inf)	0.99772		2.00494e-69	(—Inf-Inf)	0.997687		0.350703	(0-24106.31)	0.853712
	CD3+ (% Live Lymphocytes)	0.971603	(0.84-0.11)	0.687638		0.98513	(-0.1-0.07)	0.717443	1.01582	(0.93-1.11)	0.719381		0.350703	(0-24106.31)	0.853712	0.998313	(0.91-1.09)	0.970775		1.00413	(0.96-1.05)	0.849464	1.02326	(0.96-1.09)	0.484962		0.996195	(0.85-1.11)	0.835534	NA	(NA-NA)	NA		1.01431	(0.97-1.07)	0.574446			0.858901	(0.7-1.06)	0.152749		0.942767	(0.89-1)	0.0406307		0.921532	(0.77-1.1)	0.360856
	CD3+ Counts	1.00001	(1-0)	0.619746		1.00001	(0-0)	0.18579	0.99986	(1-1)	0.265538		1.01582	(0.93-1.11)	0.719381	1.00005	(1-1)	0.155377		1.00001	(1-1)	0.514556	1.00003	(1-1)	0.563131		1.00006	(1-1)	0.03*	NA	(NA-NA)	NA		0.999985	(1-1)	0.432761			0.99991	(1-1)	0.314198		0.999983	(1-1)	0.417318		0.999976	(1-1)	0.654877
	CD3-CD11b+CD11c-	0.925478	(0.71-0.19)	0.573599		1.00104	(-0.08-0.08)	0.979665	0.882174	(0.58-1.35)	0.561223		0.882174	(0.58-1.35)	0.561223	0.934826	(0.56-1.57)	0.798241		0.967602	(0.86-1.08)	0.566135	1.02264	(0.95-1.11)	0.571539		0.98302	(0.84-1.26)	0.550024	NA	(NA-NA)	NA		1.02479	(0.98-1.07)	0.265797			0.640179	(0.19-2.19)	0.476491		1.01515	(0.92-1.12)	0.762472		5.98799e-08	(—Inf-Inf)	0.995325
	CD3-CD11b+CD40+	0.834001	(0.4-0.55)	0.626607		1.02876	(-0.04-0.09)	0.383111	0.985464	(0.9-1.08)	0.757273		0.985464	(0.9-1.08)	0.757273	0.816534	(0.47-1.41)	0.469823		1.01252	(0.97-1.05)	0.520985	0.940278	(0.81-1.1)	0.43215		1.01895	(0.91-9.29)	0.397117	NA	(NA-NA)	NA		1.02743	(0.71-1.49)	0.886539			5.15393e-58	(0-1.8574368731774E+113)	0.510328		1.04141	(0.89-1.23)	0.624306		1.15567e-51	(—Inf-Inf)	0.848093
	CD3-CD11b+CD86+	1.02145	(0.88-0.17)	0.782197		1.04301	(-0.03-0.11)	0.228077	0.864657	(0.57-1.31)	0.493114		0.864657	(0.57-1.31)	0.493114	0.976319	(0.86-1.1)	0.700969		1.02908	(0.98-1.08)	0.238847	1.02445	(0.82-1.29)	0.835421		0.970819	(0.92-1.06)	0.614022	NA	(NA-NA)	NA		1.04025	(0.96-1.12)	0.304385			0.193174	(0-637.91)	0.690834		0.89311	(0.59-1.36)	0.597803		0.00981811	(0-227.62)	0.367282
	CD3-CD11c+CD11b+	1376.79	(—Inf-Inf)	0.997466		1.08162	(-0.03-0.19)	0.17286	1.03388	(0.94-1.14)	0.495827		1.03388	(0.94-1.14)	0.495827	1.30624	(0.64-2.65)	0.460029		1.10687	(0.97-1.26)	0.133224	0.987274	(0.89-1.09)	0.800321		1.03514	(0.8-1.14)	0.349931	NA	(NA-NA)	NA		1.07657	(0.98-1.19)	0.142824			0.560931	(0.06-5.5)	0.619764		1.02198	(0.92-1.13)	0.674266		0.677794	(0.09-5.03)	0.703662
	CD3-CD11c+CD11b-	1.07642	(0.36-1.16)	0.89463		1.222	(-0.31-0.71)	0.438118	1.00426	(0.69-1.46)	0.982219		1.00426	(0.69-1.46)	0.982219	0.638813	(0.19-2.17)	0.471844		0.944797	(0.7-1.27)	0.705727	0.924213	(0.55-1.55)	0.76536		1.13611	(0.58-2.48)	0.282262	NA	(NA-NA)	NA		0.861685	(0.61-1.21)	0.389784			2.99254	(—Inf-Inf)	0.999948		1.17854	(0.94-1.48)	0.151529		1.05473	(0.94-1.18)	0.355428
	CD3-CD11c+CD40+	0.902615	(0.6-0.3)	0.619625		1.04311	(-0.03-0.11)	0.255216	0.982579	(0.86-1.12)	0.791703		0.982579	(0.86-1.12)	0.791703	0.941981	(0.81-1.1)	0.451269		1.01404	(0.97-1.06)	0.494804	0.982058	(0.91-1.06)	0.660296		1.02484	(0.67-1.17)	0.257474	NA	(NA-NA)	NA		1.04792	(0.74-1.48)	0.790779			0.393182	(0.02-6.9)	0.522993		0.766304	(0.44-1.34)	0.34773		1.45723	(0.46-4.58)	0.519536
	CD3-CD11c+CD86+	1.08008	(0.86-0.3)	0.503783		1.02509	(-0.09-0.14)	0.669347	0.94413	(0.71-1.25)	0.690257		0.94413	(0.71-1.25)	0.690257	0.98012	(0.88-1.1)	0.726329		1.02731	(0.98-1.07)	0.230054	1.22071	(0.79-1.88)	0.366834		1.00109	(0.69-2.89)	0.985988	NA	(NA-NA)	NA		1.0304	(0.96-1.11)	0.431002			11.3996	(—Inf-Inf)	0.999694		1.10067	(0.96-1.26)	0.176101		39.147	(—Inf-Inf)	0.999804
	CD4+ (% CD3+)	0.990726	(0.87-0.12)	0.883773		1.0344	(-0.05-0.12)	0.446181	1.20939	(0.95-1.54)	0.123783		1.20939	(0.95-1.54)	0.123783	1.03657	(0.88-1.22)	0.669145		1.06048	(0.98-1.15)	0.134655	1.14539	(0.86-1.52)	0.349172		1.06727	(0.93-1.1)	0.153278	NA	(NA-NA)	NA		1.06779	(0.99-1.15)	0.0917088			0.972427	(0.93-1.02)	0.236553		0.979913	(0.95-1.01)	0.167718		1.01291	(0.96-1.07)	0.653263
	CD4+ (% Live Lymphocytes)	0.973096	(0.82-0.14)	0.752186		1.0244	(-0.09-0.14)	0.673805	1.07844	(0.95-1.23)	0.249804		1.07844	(0.95-1.23)	0.249804	1.00395	(0.89-1.13)	0.949219		1.01675	(0.96-1.08)	0.564466	1.04129	(0.95-1.14)	0.389715		1.00284	(0.94-1.04)	0.908222	NA	(NA-NA)	NA		1.10017	(1-1.21)	0.059118			0.727877	(0.46-1.16)	0.185021		0.8776	(0.77-1)	0.058373		0.865672	(0.59-1.28)	0.467125
	CD4+CD69+ (% Live Lymphocytes)	0.647256	(0.02-2.93)	0.799905		0.555396	(-2.63-1.46)	0.572833	4.27748	(0.78-23.41)	0.0937514		4.27748	(0.78-23.41)	0.0937514	0.765526	(0.29-1.99)	0.583616		1.16356	(0.96-1.41)	0.124744	2.03445	(0.24-17.59)	0.518759		0.912546	(0.85-2.35)	0.891932	NA	(NA-NA)	NA		1.9875	(0.31-12.7)	0.467943			0.0253863	(0-118.77)	0.394216		0.582764	(0.3-1.14)	0.115877		1.05938	(0.52-2.15)	0.872896
	CD4+CTLA4+ (% Live Lymphocytes)	1.31481	(1.05-0.5)	0.02*		1.28942	(0.03-0.48)	0.027*	5.33516e+28	(0-1.9469914658733E+114)	0.510506		5.33516e+28	(0-1.9469914658733E+114)	0.510506	1.57194	(0.69-3.6)	0.284414		1.20593	(1.01-1.45)	0.04*	2.92941	(0.52-16.4)	0.221397		2.86034	(0.81-1.39)	0.0883195	NA	(NA-NA)	NA		3.5411	(0.74-16.84)	0.111994			0.0050944	(0-29.73)	0.232763		0.364806	(0.08-1.61)	0.182296		0.188658	(0-8.78)	0.394726
	CD4+Foxp3+ (% Live Lymphocytes)	1.12311	(1.02-0.21)	0.02*		1.13274	(0.03-0.22)	0.01*	1.33463	(0.94-1.89)	0.103258		1.33463	(0.94-1.89)	0.103258	1.34523	(0.72-2.5)	0.347812		1.16938	(0.81-1.69)	0.407961	0.713663	(0.16-3.17)	0.657577		1.08693	(0.94-1.07)	0.712551	NA	(NA-NA)	NA		0.869931	(0.34-2.23)	0.771512			0.00124352	(0-166.57)	0.266708		0.63805	(0.31-1.33)	0.232733		0.210025	(0-33.66)	0.546867
	CD4+GrzB+(% Live Lymphocytes)	205631	(—Inf-Inf)	0.999367		1.19734	(-0.44-0.8)	0.566574	1.03638	(0.75-1.43)	0.8267		1.03638	(0.75-1.43)	0.8267	2.27249	(0.51-10.1)	0.28064		1.05414	(0.53-2.1)	0.880499	181497	(—Inf-Inf)	0.999599		1.41752	(0.85-1.68)	0.338214	NA	(NA-NA)	NA		0.699788	(0.11-4.37)	0.702472			1.537e-230	(—Inf-Inf)	0.92024		0.221232	(0.02-2.74)	0.239835		0	(—Inf-Inf)	0.509444
	CD4+IFNg+ (% Live Lymphocytes)	2.38219e-20	(0-23.27)	0.195748		0.0145086	(-19.49-11.03)	0.586684	422960	(0.05-3417372485621.43)	0.110387		422960	(0.05-3417372485621.43)	0.110387	1.42479	(0.23-8.72)	0.701664		0.829796	(0.21-3.26)	0.78929	4.79073e+36	(—Inf-Inf)	0.999062		182.202	(0.89-1.05)	0.119996	NA	(NA-NA)	NA		60.5494	(0-1550855.78)	0.42818			0.856646	(0.23-3.25)	0.820238		0.912297	(0.6-1.39)	0.670383		0.813825	(0-191.1)	0.941037
	CD4+Ki-67+ (% Live Lymphocytes)	3.39942	(0.93-2.52)	0.0636444		1.8093	(-0.74-1.93)	0.384677	1.10941	(0.97-1.27)	0.129656		1.10941	(0.97-1.27)	0.129656	4607.74	(0-139822383911.23)	0.337223		1448.24	(4.23-495644.07)	0.01*	9.05638	(0.21-398.56)	0.253789		2.2225	(0.97-1.07)	0.175795	NA	(NA-NA)	NA		3.45392	(0.68-17.5)	0.134326			0.263831	(0-19.83)	0.545464		0.673607	(0.2-2.25)	0.521128		0.908323	(0.4-2.07)	0.819308
	CD4+PD1+ (% Live Lymphocytes)	0.873561	(0.31-0.91)	0.800756		0.860953	(-0.75-0.45)	0.624084	16.3223	(0.17-1578.29)	0.231212		16.3223	(0.17-1578.29)	0.231212	0.93408	(0.42-2.06)	0.8662		1.05941	(0.97-1.16)	0.209065	0.176003	(0-23.32)	0.485921		1.83347	(0.97-1.08)	0.419319	NA	(NA-NA)	NA		1.39273	(0.6-3.24)	0.442263			0.00578205	(0-13.14)	0.191292		0.898675	(0.73-1.1)	0.29832		0.877128	(0.53-1.46)	0.613
	CD69+ (% CD4+)	1.03293	(0.39-1.01)	0.948119		0.835723	(-0.92-0.56)	0.6346	1.93566	(0.99-3.79)	0.0538768		1.93566	(0.99-3.79)	0.0538768	0.903897	(0.63-1.31)	0.590795		1.03974	(0.99-1.1)	0.150628	0.966339	(0.75-1.25)	0.794379		0.933776	(0.81-1.1)	0.473436	NA	(NA-NA)	NA		0.86967	(0.51-1.47)	0.602139			1.0053	(0.95-1.06)	0.844817		0.986147	(0.95-1.03)	0.503744		1.09135	(0.98-1.21)	0.101455
	CD69+ (% CD8+)	0.982417	(0.71-0.31)	0.914541		0.944908	(-0.27-0.16)	0.6097	1.00785	(0.75-1.35)	0.957886		1.00785	(0.75-1.35)	0.957886	1.03293	(0.98-1.09)	0.20497		1.01934	(0.99-1.05)	0.169753	1.01391	(0.97-1.06)	0.543765		0.999258	(0.82-1.12)	0.966944	NA	(NA-NA)	NA		1.01149	(0.95-1.07)	0.703221			1.01333	(0.97-1.06)	0.530912		1.00775	(0.99-1.03)	0.505287		1.01671	(0.89-1.16)	0.810994
	CD8+ (% CD3+)	0.946553	(0.82-0.09)	0.469866		0.960967	(-0.13-0.05)	0.370701	0.786976	(0.61-1.01)	0.0643533		0.786976	(0.61-1.01)	0.0643533	1.01623	(0.87-1.19)	0.839015		0.979974	(0.9-1.06)	0.623325	0.958039	(0.79-1.16)	0.664556		0.985592	(0.67-1.31)	0.736805	NA	(NA-NA)	NA		1.00579	(0.94-1.08)	0.868937			0.936627	(0.87-1.01)	0.101754		0.956734	(0.91-1)	0.0520034		1.0076	(0.93-1.09)	0.855039
	CD8+ (% Live Lymphocytes)	0.909803	(0.73-0.13)	0.411187		0.940439	(-0.19-0.06)	0.330543	0.743891	(0.51-1.09)	0.130975		0.743891	(0.51-1.09)	0.130975	1.02745	(0.81-1.31)	0.824467		0.980361	(0.87-1.11)	0.75238	1.03304	(0.83-1.29)	0.776719		0.97443	(0.79-1.12)	0.704009	NA	(NA-NA)	NA		1.01585	(0.94-1.09)	0.678214			0.68477	(0.36-1.32)	0.255827		0.858126	(0.72-1.02)	0.0807259		0.755092	(0.36-1.58)	0.454498
	CD8+CD69+ (% Live Lymphocytes)	0.705397	(0.08-1.89)	0.75993		0.57219	(-2.13-1.01)	0.486586	0.20217	(0-24.44)	0.513439		0.20217	(0-24.44)	0.513439	0.991215	(0.87-1.13)	0.895819		1.03049	(0.99-1.07)	0.108324	1.0937	(0.75-1.59)	0.641162		0.967134	(0.63-4.89)	0.836194	NA	(NA-NA)	NA		1.00082	(0.45-2.22)	0.998381			0.045963	(0-58.37)	0.398297		0.806009	(0.56-1.17)	0.251544		0.735867	(0.19-2.79)	0.651957
	CD8+CTLA4+ (% Live Lymphocytes)	2.02953	(1.01-1.4)	0.046*		1.41805	(-0.39-1.09)	0.357241	1.51532	(0-482.29)	0.887589		1.51532	(0-482.29)	0.887589	1.04482	(0.92-1.19)	0.506738		1.06894	(1-1.15)	0.0632943	4.01538	(0.48-33.73)	0.20045		3.4167	(0.41-7.85)	0.0667134	NA	(NA-NA)	NA		1.34753	(0.22-8.27)	0.747262			1.22408e-06	(0-1902316.69)	0.341871		0.216571	(0.01-4.4)	0.319247		0.0659589	(0-430.68)	0.544103
	CD8+GrnzB+ (% Live Lymphocytes)	0.897342	(0.65-0.21)	0.511254		0.869197	(-0.34-0.06)	0.178704	0.623891	(0.2-1.9)	0.406291		0.623891	(0.2-1.9)	0.406291	1.03611	(0.75-1.43)	0.827947		0.986733	(0.82-1.19)	0.88989	0.929798	(0.58-1.5)	0.763977		0.846931	(0.03-13.73)	0.274625	NA	(NA-NA)	NA		1.03174	(0.95-1.11)	0.428858			2.89622e-15	(0-730565763.06)	0.223372		0.8259	(0.58-1.17)	0.285743		0.184944	(0-91.09)	0.593648
	CD8.IFNg.....Live...Peptide.Media.	1.00894e-11	(0-50.02)	0.510097		190.861	(-13.89-24.4)	0.590855	0.33332	(0-13679.93)	0.839357		0.33332	(0-13679.93)	0.839357	0	(—Inf-Inf)	0.990849		2.62506	(0.01-557.54)	0.724083	0	(—Inf-Inf)	0.998971		4.62461e-13	(0.81-1.15)	0.50267	NA	(NA-NA)	NA		3493.22	(0-2.15482031897521E+30)	0.795464			2.13624e+32	(0-1.21132035244294E+80)	0.184537		2.40142e+19	(0-4.97789182441939E+45)	0.148911		1.12089e-130	(—Inf-Inf)	0.782031
	CD8+IFNg+ (% Live Lymphocytes)	0.175261	(0-10.56)	0.781505		0.0101553	(-16.25-7.08)	0.44061	1.26026e-26	(0-1.28693970429806E+23)	0.300309		1.26026e-26	(0-1.28693970429806E+23)	0.300309	3.50833e-18	(0-6.81486265935294E+32)	0.496317		2.07658	(0.73-5.88)	0.168995	3.05541e+13	(0-1.57162404813886E+37)	0.264992		9676.3	(0.79-1.79)	0.029*	NA	(NA-NA)	NA		5312.79	(0.03-1096547168.28)	0.169495			0.0146843	(0-1249404451.23)	0.742364		0.930269	(0.32-2.73)	0.895309		0.0872015	(0-63168.45)	0.72307
	CD8+Ki-67+ (% Live Lymphocytes)	21.2859	(0.11-8.33)	0.255404		0.314761	(-6.37-4.06)	0.66402	1.541e-19	(0-1.97202264291127E+23)	0.381219		1.541e-19	(0-1.97202264291127E+23)	0.381219	11.5957	(0.01-15446.04)	0.504377		14.8434	(0.76-288.42)	0.074741	2.24659	(0.42-11.95)	0.342542		1.35983	(0.01-61.81)	0.56122	NA	(NA-NA)	NA		8.70571	(0.47-162.15)	0.14699			0.0274563	(0-130.55)	0.405282		0.406431	(0.04-4.21)	0.450319		0.542421	(0-59.36)	0.798459
	CD8+PD1+ (% Live Lymphocytes)	0.00589572	(0-10)	0.506266		0.41901	(-4.22-2.48)	0.610955	22.0263	(0.17-2929.84)	0.21524		22.0263	(0.17-2929.84)	0.21524	1.22551	(0.72-2.1)	0.458434		1.19545	(0.96-1.49)	0.108692	4.01705	(0.11-140.44)	0.443196		2.6167	(0.91-1.05)	0.370146	NA	(NA-NA)	NA		0.804122	(0.02-27.84)	0.904049			0.50959	(0.07-3.77)	0.509136		0.88598	(0.71-1.11)	0.296537		0.763654	(0.26-2.22)	0.619837
	CTLA4+ (% CD4+)	1.43092	(0.67-3.05)	0.353241		1.07787	(1.01-1.16)	0.04*	1.07089	(0.84-1.36)	0.574179		1.10629	(0.95-1.28)	0.181573	1.01221	(0.86-1.19)	0.88305		0.985169	(0.86-1.13)	0.834148	1.8411	(0.89-3.8)	0.0983006		1.53565	(1.15-2.04)	0.003*	NA	(NA-NA)	NA		1.46855	(0.94-2.3)	0.0943164			1.03076	(0.99-1.08)	0.161045		1.01365	(0.99-1.04)	0.329674		0.982887	(0.93-1.04)	0.557958
	CTLA4+ (% CD8+)	1.11557	(0.99-1.26)	0.0790321		1.06232	(0.99-1.14)	0.101754	1.0181	(0.86-1.21)	0.839573		0.987361	(0.85-1.14)	0.864988	1.05433	(0.99-1.12)	0.083437		1.01627	(0.97-1.06)	0.485971	1.03904	(0.93-1.16)	0.507714		1.03822	(0.98-1.1)	0.209763	NA	(NA-NA)	NA		1.01046	(0.74-1.38)	0.947917			1.01328	(0.98-1.05)	0.447092		1.00198	(0.98-1.03)	0.877627		1.00386	(0.97-1.04)	0.821265
	FoxP3+ (% CD4+)	0.976606	(0.82-1.16)	0.791193		1.00158	(0.94-1.07)	0.962794	1.05987	(0.96-1.17)	0.245445		1.07468	(1.01-1.14)	0.01*	0.956357	(0.73-1.25)	0.74483		0.971107	(0.87-1.08)	0.58138	0.917201	(0.63-1.34)	0.657454		0.997295	(0.93-1.07)	0.935847	NA	(NA-NA)	NA		0.897542	(0.7-1.16)	0.402654			1.00466	(0.96-1.05)	0.849666		0.995031	(0.96-1.03)	0.766149		0.953579	(0.82-1.11)	0.542296
	GrzB+ (% CD8+)	1.03404	(0.97-1.1)	0.28454		0.992308	(0.95-1.03)	0.702445	1.00393	(0.94-1.07)	0.907814		1.00381	(0.97-1.04)	0.84143	1.01736	(0.96-1.08)	0.569466		1.01417	(0.98-1.05)	0.418348	0.986284	(0.92-1.06)	0.691677		0.975872	(0.94-1.02)	0.258956	NA	(NA-NA)	NA		0.995815	(0.96-1.04)	0.83366			1.01421	(0.98-1.05)	0.393857		1.01019	(0.99-1.03)	0.264967		0.911016	(0.77-1.08)	0.285384
	GrzB+ (% CD4+)	1.23603	(0.85-0.59)	0.268257		0.992144	(-0.22-0.2)	0.940625	1.00353	(0.91-1.11)	0.943822		1.00353	(0.91-1.11)	0.943822	1.5894	(0.59-4.28)	0.359258		1.02975	(0.85-1.24)	0.760535	1.10475	(0.83-1.46)	0.486263		0.95059	(0.96-1.11)	0.575961	NA	(NA-NA)	NA		0.837835	(0.49-1.44)	0.524007			1.00493	(0.95-1.07)	0.871617		0.97569	(0.92-1.03)	0.377436		0.000948771	(—Inf-Inf)	0.997244
	HLA-DR-CD11b+CD33+ MDSC (% Live Lymphocytes)	0.718908	(—Inf-Inf)	0.999679		0.641625	(—Inf-Inf)	0.99965	0.289801	(—Inf-Inf)	0.999213		0.289801	(—Inf-Inf)	0.999213	NA	(NA-NA)	NA		NA	(NA-NA)	NA	NA	(NA-NA)	NA		NA	(0.9-1.43)	NA	NA	(NA-NA)	NA		0.183373	(—Inf-Inf)	0.999579			0.718908	(—Inf-Inf)	0.999679		0.641625	(—Inf-Inf)	0.99965		0.289801	(—Inf-Inf)	0.999213
	IFNg+ (% CD4+)	5.4009e-06	(0-10.66)	0.296881		0.13668	(-6.76-2.78)	0.413428	858.182	(0.02-42437407.94)	0.220627		858.182	(0.02-42437407.94)	0.220627	1.13316	(0.58-2.22)	0.715305		0.918954	(0.54-1.55)	0.751645	4.98397e+24	(—Inf-Inf)	0.99874		4.38305	(0.98-1.07)	0.299716	NA	(NA-NA)	NA		1.02265	(0.17-6.27)	0.980695			1.02559	(1-1.05)	0.0735454		1.01789	(1-1.03)	0.0292928		1.01329	(0.97-1.06)	0.528651
	IFNg+ (% CD8+)	0.830432	(0.15-1.51)	0.829985		0.538417	(-2.45-1.21)	0.506656	0.00103145	(0-847.74)	0.32235		0.00103145	(0-847.74)	0.32235	8.82813e-07	(0-20524211.39)	0.374681		0.985808	(0.35-2.74)	0.978136	2.49	(1.17-5.31)	0.02*		2.12	(1.08-4.53)	0.03*	NA	(NA-NA)	NA		1.05148	(0.98-1.13)	0.147522			1.0203	(0.99-1.05)	0.130611		1.01144	(0.99-1.03)	0.203993		0.992539	(0.91-1.08)	0.866147
	IFNg+ (% CD8+) (Peptide-Media)	0.0117809	(0-9.06)	0.519206		1.0233	(-2.69-2.73)	0.986705	1.12572	(0.47-2.72)	0.792097		1.12572	(0.47-2.72)	0.792097	1.10647e-07	(—Inf-Inf)	0.999309		1.08229	(0.71-1.65)	0.711291	3.37696e-89	(—Inf-Inf)	0.998318		0.550802	(0-5.4052379180821E+23)	0.711948	NA	(NA-NA)	NA		0.00426984	(0-1930.4)	0.411509			3.07079e-66	(—Inf-Inf)	0.994232		0.52211	(0.01-37.7)	0.76598		0.167005	(0-1089.54)	0.689617
	Ki67+ (% CD4+)	1.33698	(0.94-1.91)	0.111324		1.20666	(0.99-1.47)	0.0642617	0.981834	(0.8-1.21)	0.861715		0.978655	(0.88-1.08)	0.681708	1.27882	(0.28-5.9)	0.752564		0.997071	(0.92-1.08)	0.942503	1.07185	(0.97-1.18)	0.152247		1.08175	(0.97-1.21)	0.171069	NA	(NA-NA)	NA		1.60646	(0.98-2.63)	0.0597598			0.996384	(0.96-1.03)	0.831894		0.989481	(0.97-1.01)	0.376522		0.938608	(0.78-1.13)	0.504933
	Ki67+ (% CD8+)	2.03406	(1.03-4.03)	0.04*		1.33961	(0.93-1.94)	0.119369	1.06851	(0.98-1.17)	0.148887		1.01718	(0.96-1.08)	0.588664	1.20503	(0.95-1.53)	0.12744		1.00994	(0.96-1.06)	0.713753	1.46304	(0.62-3.45)	0.38481		1.13006	(1-1.28)	0.0530784	NA	(NA-NA)	NA		1.05652	(0.99-1.13)	0.111365			0.991155	(0.95-1.03)	0.662194		0.988633	(0.96-1.01)	0.363454		1.00143	(0.97-1.03)	0.924784
	Live	1.10999	(0.72-0.54)	0.637628		1.14403	(-0.12-0.39)	0.304354	0.200892	(—Inf-Inf)	0.999576		0.200892	(—Inf-Inf)	0.999576	0.976983	(0.84-1.14)	0.76945		1.0058	(0.93-1.09)	0.888509	8.42565e-07	(—Inf-Inf)	0.998366		1.0279	(NA-NA)	0.793446	NA	(NA-NA)	NA		0.967565	(0.88-1.06)	0.483615			42.3874	(—Inf-Inf)	0.997874		0.997198	(0.96-1.04)	0.882695		1.03526	(0.92-1.16)	0.557892
	Live Lymphocytes Count	1.00077	(0.44-0.81)	0.998511		1.00011	(0-0)	0.0809285	0.999926	(1-1)	0.500715		0.999926	(1-1)	0.500715	1.00001	(1-1)	0.648879		1.00001	(1-1)	0.352285	0.999991	(1-1)	0.660629		1	(0.02-13.06)	0.555141	NA	(NA-NA)	NA		0.999987	(1-1)	0.439036			1	(1-1)	0.72045		0.999996	(1-1)	0.541425		0.999907	(1-1)	0.595888
	PD1+ (% CD4+)	1.09532	(0.95-1.26)	0.210068		1.02571	(0.91-1.16)	0.680199	0.953773	(0.52-1.74)	0.8779		0.991082	(0.73-1.34)	0.953649	1.00436	(0.88-1.15)	0.949153		1.02331	(0.99-1.06)	0.16557	0.870101	(0.56-1.35)	0.536536		0.988371	(0.83-1.17)	0.8933	NA	(NA-NA)	NA		0.966898	(0.78-1.19)	0.752299			1.01351	(0.98-1.04)	0.379562		1.00745	(0.99-1.03)	0.438633		0.971921	(0.91-1.04)	0.391001
	PD1+ (% CD8+)	1.04902	(0.91-1.21)	0.508936		0.991868	(0.87-1.13)	0.902145	1.02072	(0.84-1.24)	0.838194		0.997417	(0.82-1.22)	0.979866	0.0359619	(0-667.11)	0.507244		1.01587	(0.99-1.04)	0.203962	0.814103	(0.34-1.97)	0.647847		1.05944	(0.82-1.38)	0.664424	NA	(NA-NA)	NA		0.899333	(0.6-1.34)	0.600563			1.01084	(0.99-1.04)	0.410673		1.00797	(0.99-1.02)	0.340423		1.01307	(0.99-1.04)	0.334416
	TCR Variable
Blood Samples	Productive Templates	0.999987	(1-1)	0.619903		1.00002	(1-1)	0.220746	0.999886	(1-1)	0.110496		1	(1-1)	0.849606	1.00002	(1-1)	0.82875		1.00003	(1-1)	0.530415	1.00001	(1-1)	0.900819		1.00002	(1-1)	0.411179	NA	(NA-NA)	NA		0.999991	(1-1)	0.824084		Tumor Samples	0.999949	(1-1)	0.525822		0.999929	(1-1)	0.177717		1.00003	(1-1)	0.673228
	Outofframe Templates	0.999906	(1-1)	0.490349		1.00005	(1-1)	0.451472	0.999471	(1-1)	0.121532		0.999982	(1-1)	0.847815	1.00001	(1-1)	0.983195		0.999997	(1-1)	0.988513	0.999998	(1-1)	0.99575		1.00008	(1-1)	0.575424	NA	(NA-NA)	NA		0.999969	(1-1)	0.897341			0.999888	(1-1)	0.746625		0.999692	(1-1)	0.20532		1.00016	(1-1)	0.558466
	Total Rearrangements	0.999978	(1-1)	0.522096		1.00002	(1-1)	0.178329	0.999886	(1-1)	0.149155		1.00002	(1-1)	0.518459	1.00001	(1-1)	0.920555		1.00005	(1-1)	0.342995	1.00001	(1-1)	0.945762		1.00006	(1-1)	0.10287	NA	(NA-NA)	NA		1.00002	(1-1)	0.747999			0.999949	(1-1)	0.629284		0.999903	(1-1)	0.177144		1.00006	(1-1)	0.652325
	Total Templates	0.999988	(1-1)	0.588133		1.00001	(1-1)	0.250133	0.999907	(1-1)	0.111483		1	(1-1)	0.909347	1.00001	(1-1)	0.860133		1.00002	(1-1)	0.620765	1.00001	(1-1)	0.919461		1.00002	(1-1)	0.435207	NA	(NA-NA)	NA		0.999993	(1-1)	0.836026			0.999963	(1-1)	0.559195		0.999943	(1-1)	0.180566		1.00002	(1-1)	0.644671
	Productive Rearrangements	0.999974	(1-1)	0.528039		1.00002	(1-1)	0.174179	0.99986	(1-1)	0.152981		1.00002	(1-1)	0.499329	1.00002	(1-1)	0.918435		1.00006	(1-1)	0.29751	1.00001	(1-1)	0.948748		1.00008	(1-1)	0.0986848	NA	(NA-NA)	NA		1.00003	(1-1)	0.734603			0.99993	(1-1)	0.599683		0.999878	(1-1)	0.171615		1.00007	(1-1)	0.675293
	Outofframe Rearrangements	0.999857	(1-1)	0.493902		1.00011	(1-1)	0.202081	0.999346	(1-1)	0.137161		1.00008	(1-1)	0.600463	1.00005	(1-1)	0.941906		1.00016	(1-1)	0.575528	1.00004	(1-1)	0.942651		1.00032	(1-1)	0.130926	NA	(NA-NA)	NA		1.00009	(1-1)	0.804307			0.999832	(1-1)	0.769662		0.999504	(1-1)	0.211328		1.00037	(1-1)	0.570231
	Productive Clonality	0.0690428	(0-894774250160.53)	0.862243		0.00125477	(0-33322.61)	0.443693	1.55149e-08	(0-431056279866.06)	0.431174		6.6403e-10	(0-115.71)	0.109554	1.03808	(0-244261629586.43)	0.997768		0.000103533	(0-376.88)	0.233893	10.7452	(0-1008688527917350)	0.884986		1.52649e-06	(0-1591.99)	0.206203	NA	(NA-NA)	NA		0.0135484	(0-2945.05)	0.4927			5.09765e-06	(0-127763.9)	0.318507		0.00444712	(0-105.75)	0.292178		3.85709e-05	(0-2181707415.76)	0.529329
	Productive Entropy	0.731539	(0.24-2.21)	0.579511		1.38142	(0.72-2.66)	0.333855	0.777629	(0.32-1.88)	0.576688		1.75164	(0.8-3.83)	0.16008	1.14669	(0.26-5.02)	0.85574		1.36607	(0.7-2.66)	0.359187	1.09132	(0.23-5.25)	0.913136		1.94296	(0.87-4.35)	0.105828	NA	(NA-NA)	NA		1.37849	(0.66-2.86)	0.388409			0.96334	(0.66-1.41)	0.846898		0.868189	(0.7-1.07)	0.189235		0.923219	(0.55-1.55)	0.762493
	Sample Entropy	0.763668	(0.25-2.33)	0.635212		1.47153	(0.76-2.86)	0.255046	0.780993	(0.31-1.99)	0.603848		1.8965	(0.85-4.24)	0.118479	1.25824	(0.24-6.49)	0.783747		1.44279	(0.71-2.95)	0.314976	1.17612	(0.23-5.91)	0.843949		2.03418	(0.89-4.63)	0.0903652	NA	(NA-NA)	NA		1.3705	(0.66-2.84)	0.396535			0.960076	(0.65-1.41)	0.836484		0.875307	(0.7-1.09)	0.231722		0.907914	(0.51-1.61)	0.741688
	Max Productive Frequency	0.234429	(0-1.97522062833756E+22)	0.957047		1.09387e-07	(0-81323563.25)	0.358916	1.3133e-06	(0-9777277771515790000)	0.643015		1.84665e-18	(0-289022.66)	0.134001	4.19373e-05	(0-2.31881484511818E+22)	0.748348		1.86572e-11	(0-564910.35)	0.201981	0.000644765	(0-1.01096248590074E+24)	0.818134		6.36999e-15	(0-88580552.43)	0.208927	NA	(NA-NA)	NA		0.00072944	(0-181332533.79)	0.589508			5.72871e-21	(0-813720473209.03)	0.217233		0.273066	(0-44568.89)	0.832139		0.000168314	(0-2694945234742570)	0.700123
	Max Frequency	0.00388533	(0-5.33969154799569E+25)	0.866655		4.76378e-11	(0-27471838.28)	0.254676	2.17224e-09	(0-8.9887859824196E+20)	0.566441		8.00688e-23	(0-46846.04)	0.10567	1.20888e-07	08.79371858501701E+28	0.705378		4.33039e-16	070409.58	0.136259	1.34535e-05	(0-1.78105249114732E+30)	0.78575		2.18766e-18	(0-11410648.62)	0.161407	NA	(NA-NA)	NA		1.2025e-06	(0-11338016910.99)	0.467633			4.11724e-31	(0-61978857596268.5)	0.177638		9.27741e-05	(0-116591.56)	0.38506		3.49735e-10	(0-5765195871260230000)	0.511288
		Fold Changes for Week 5 from Baseline								Fold Changes for Week 5 from Baseline
		OS				RFS				OS			RFS
		HR	95% CI	P		HR	95% CI	P		HR	95% CI	P	HR	95% CI	P
Blood Samples	CD3+ Counts	0.914443	(0.34-2.44)	0.858527		1.32448	(0.79-2.22)	0.284194	Tumor Samples	1.08816	(-0.34-0.51)	0.697681	1.14047	(-0.05-0.31)	0.151007
	CD3+ (% Live Lymphocytes)	0.955982	(0.15-6.26)	0.962557		1.00085	(0.38-2.67)	0.998641		1.58164	(-0.03-0.94)	0.0635978	1.25873	(-0.03-0.49)	0.0854427
	CD4+ (% CD3+)	139.38	(0.4-48768.04)	0.0985367		22.3568	(0.98-507.65)	0.0511499		1.12716	(-1.04-1.28)	0.839637	0.997008	(-0.36-0.36)	0.986941
	CD69+ (% CD4+)	0.480498	(0.21-1.09)	0.0790408		0.633528	(0.4-0.99)	0.0459121		0.489774	(-3.07-1.64)	0.552171	0.927697	(-0.42-0.27)	0.671408
	IFNg+ (% CD4+)	0.860308	(0.42-1.75)	0.676881		0.85926	(0.54-1.36)	0.519154		0.0617321	(—Inf-Inf)	0.999127	0.894229	(-0.23-0)	0.0550406
	CD4+CD69+ (% Live Lymphocytes)	0.50715	(0.21-1.23)	0.134286		0.687777	(0.41-1.14)	0.149144		1.62334	(-0.31-1.28)	0.234118	1.13038	(-0.08-0.32)	0.235252
	CD4+CTLA4+ (% Live Lymphocytes)	0.935623	(0.55-1.59)	0.80513		1.20752	(0.77-1.9)	0.414665		1.15001	(-0.15-0.43)	0.345269	1.10182	(-0.06-0.25)	0.225304
	CD8+ (% CD3+)	0.0104877	(0-6.23)	0.1619		1.08224	(0.14-8.45)	0.939917		1.14295	(-0.16-0.42)	0.368458	0.959827	(-0.31-0.23)	0.763085
	CD69+ (% CD8+)	0.275297	(0.07-1.03)	0.0558738		0.511959	(0.23-1.15)	0.104108		0.856156	(-1.01-0.7)	0.72226	0.87996	(-0.46-0.2)	0.444253
	CD8+CD69+ (% Live Lymphocytes)	0.455721	(0.18-1.14)	0.0924929		0.740796	(0.42-1.29)	0.291767		1.30857	(-0.17-0.71)	0.229483	1.02279	(-0.11-0.15)	0.737393
	CD4+ (% Live Lymphocytes)	2.35364	(0.28-20)	0.433012		1.32305	(0.6-2.91)	0.486517		1.39228	(-0.06-0.72)	0.0975635	1.20798	(-0.04-0.42)	0.112864
	CD8+ (% Live Lymphocytes)	0.6465	(0.15-2.85)	0.564166		1.01215	(0.43-2.38)	0.977883		1.21929	(-0.04-0.44)	0.104732	1.07388	(-0.09-0.23)	0.375979
	Live Lymphocytes Count	0.440035	(0.05-3.72)	0.450971		0.839199	(0.41-1.74)	0.636636		0.00538012	(—Inf-Inf)	0.999114	1.08197	(-0.2-0.35)	0.573817
	Live	3.69157e-73	(—Inf-Inf)	0.999019		0.0399672	(0-338.35)	0.485319		0.783691	(-2.43-1.95)	0.827305	1.04673	(-1.18-1.27)	0.941736
	GrzB+ (% CD4+)	0.723887	(0.16-3.25)	0.673414		0.890339	(0.48-1.65)	0.712657		0.248297	(-4.49-1.71)	0.378316	0.127445	(-4.76-0.64)	0.134785
	PD1+ (% CD4+)	0.682569	(0.34-1.36)	0.27874		0.90056	(0.65-1.25)	0.528446		1.01885	(0.87-1.20)	0.819902	0.99505	(0.90-1.11)	0.930953
	Ki67+ (% CD8+)	1.27202	(0.45-3.59)	0.64942		1.21528	(0.75-1.98)	0.433749		0.999784	(0.86-1.16)	0.997678	0.998716	(0.90-1.11)	0.98091
	PD1+ (% CD8+)	0.821484	(0.45-1.49)	0.516587		0.916747	(0.65-1.29)	0.614402		0.992769	(0.88-1.12)	0.905786	0.987884	(0.91-1.08)	0.781731
	CD11c+CD11b+ (% Live Lymphocytes)	4.56551e-23	(—Inf-Inf)	0.998352		0.514301	(0.12-2.18)	0.366912		0.966384	(-0.35-0.28)	0.829672	0.941499	(-0.25-0.13)	0.52803
	CD11c+CD11b- (% Live Lymphocytes)	0.660503	(0.15-2.98)	0.589423		1.06839	(0.61-1.87)	0.817309		6.50758e-15	(—Inf-Inf)	0.998341	0.587032	(-1.14-0.08)	0.0866907
	CD11b+CD40+ (% Live Lymphocytes)	1.02812	(0.45-2.34)	0.947303		1.05328	(0.66-1.68)	0.828242		1.43728	(-0.54-1.27)	0.432116	0.91412	(-0.35-0.17)	0.505702
	CD11c+CD40+ (% Live Lymphocytes)	1.91846	(0.5-7.4)	0.344339		1.33264	(0.65-2.74)	0.434102		6.91457e+27	(—Inf-Inf)	0.998197	1.09346	(-1-1.18)	0.872714
	CD11c+CD86+ (% Live Lymphocytes)	0.837618	(0.44-1.58)	0.585685		1.03403	(0.74-1.44)	0.84323		0.199197	(—Inf-Inf)	0.999744	0.672419	(-0.92-0.12)	0.135718
	CD11b+CD11c-CD40+ (% Live Lymphocytes)	1.34943	(0.73-2.51)	0.344133		1.0966	(0.81-1.49)	0.555633		0.964211	(-0.57-0.49)	0.892797	0.95421	(-0.34-0.25)	0.753154
	CD11b+CD11c-CD40+	1.18166	(0.69-2.02)	0.54266		1.12194	(0.82-1.53)	0.467603		0.947404	(-0.52-0.41)	0.820159	0.93858	(-0.32-0.19)	0.624856
	CD11c+HLA-DR+CD141+ DC (% Live Lymphocytes)	0.207902	(—Inf-Inf)	0.999579		0.207902	(—Inf-Inf)	0.999579		NA	(NA-NA)	NA	NA	(NA-NA)	NA
	CD3-CD11b+CD11c-	1.84655	(0.58-5.92)	0.302127		0.96814	(0.55-1.72)	0.911823		5.7171e+14	(—Inf-Inf)	0.998885	41.1857	(-1.44-8.88)	0.157757
	CD3-CD11b+CD40+	1.09238	(0.5-2.39)	0.824634		1.07975	(0.7-1.68)	0.732272		1.63118e+16	(—Inf-Inf)	0.996856	0.929585	(-0.34-0.2)	0.597616
	CD3-CD11c+CD11b+	1.43835e-17	(—Inf-Inf)	0.998956		0.538839	(0.11-2.68)	0.450055		0.984044	(-0.3-0.27)	0.912122	0.950899	(-0.23-0.13)	0.588885
	CD3-CD11c+CD40+	2.60456	(0.41-16.46)	0.308838		1.44448	(0.71-2.95)	0.313879		859951	(—Inf-Inf)	0.999288	1.58517	(-0.62-1.54)	0.40281
	CTLA4+ (% CD8+)	1.00359	(0.68-1.48)	0.985649		1.1879	(0.93-1.52)	0.17447		0.966252	(0.85-1.10)	0.598538	0.980152	(0.90-1.07)	0.657392
	Total Templates	1.05872	(0.07-16.85)	0.967763		1.27677	(0.52-3.15)	0.595395		1.17717	(-0.14-0.46)	0.285192	1.07181	(-0.14-0.28)	0.508752
	Productive Templates	1.03495	(0.07-16.4)	0.980559		1.25698	(0.51-3.11)	0.620611		1.18283	(-0.13-0.47)	0.273747	1.07358	(-0.13-0.28)	0.497829
	Outofframe Templates	1.17657	(0.07-18.62)	0.908128		1.33957	(0.55-3.25)	0.518376		1.152	(-0.15-0.43)	0.340954	1.06094	(-0.15-0.27)	0.57419
	Total Rearrangements	1.01126	(0.06-17.45)	0.993853		1.29725	(0.55-3.07)	0.553423		1.15425	(-0.15-0.44)	0.338518	1.06439	(-0.15-0.27)	0.559115
	Productive Rearrangements	0.996906	(0.06-16.7)	0.99828		1.29143	(0.55-3.03)	0.557437		1.15761	(-0.15-0.44)	0.328879	1.06631	(-0.14-0.27)	0.545673
	Outofframe Rearrangements	1.09628	(0.05-22)	0.952096		1.31687	(0.54-3.22)	0.545588		1.14205	(-0.16-0.43)	0.37997	1.057	(-0.16-0.27)	0.613018
	Productive Clonality	4.21301	(0.02-749.46)	0.586413		0.823292	(0.36-1.88)	0.645243		1.17924	(-0.36-0.69)	0.538381	0.959868	(-0.34-0.26)	0.787571
	Productive Entropy	0.133183	(0-5470633389.48)	0.871554		12.4439	(0.01-16681.85)	0.49256		1.75208	(-1.1-2.23)	0.5091	1.2754	(-0.94-1.43)	0.686683
	Sample Entropy	0.0693945	(0-2536329413.5)	0.829772		7.19456	(0.01-7394.45)	0.577058		1.75699	(-1.17-2.3)	0.524906	1.26831	(-0.99-1.47)	0.705413
	Cox Univariate model for the proportions of clones present in each group
		Baseline							Week 1							Week 3							Week 5							Week 12									Baseline								Week 1
		OS				RFS			OS				RFS			OS				RFS			OS				RFS			OS				RFS				Tumor Samples	OS				RFS				OS
	Clone Groups	HR	95% CI	P		HR	95% CI	P	HR	95% CI	P		HR	95% CI	P	HR	95% CI	P		HR	95% CI	P	HR	95% CI	P		HR	95% CI	P	HR	95% CI	P		HR	95% CI	P			HR	95% CI	P		HR	95% CI	P		HR	95% CI	P
Blood Samples	HPV-PMA-CTRL+	0	(—Inf-Inf)	0.662256		0	(—Inf-Inf)	0.505552	0	(—Inf-Inf)	0.511418		0	(—Inf-0)	0.03*	0	(—Inf-Inf)	0.999456		0	(—Inf-Inf)	0.229762	NA	(—Inf-Inf)	0.999922		NA	(6.1E+122-Inf)	0.02*	NA	(NA-NA)	NA		3.6481e+58	(—Inf-Inf)	0.920496			8.94908e+183	(0-Inf)	0.184935		3.35713e+198	(5.75313365620416E+36-Inf)	0.016*		0	(—Inf-Inf)	0.676719
	HPV-PMA+CTRL+	0	(—Inf-Inf)	0.776814		0	(—Inf-Inf)	0.500242	0	(—Inf-Inf)	0.998767		0	(—Inf-Inf)	0.997316	0	(—Inf-Inf)	0.998997		1.09679e+21	(—Inf-Inf)	0.944255	0	(—Inf-Inf)	0.998881		NA	(—Inf-Inf)	0.267545	NA	(NA-NA)	NA		0	(—Inf-Inf)	0.285228			0	(—Inf-Inf)	0.562088		0	(—Inf-Inf)	0.299492		0	(—Inf-Inf)	0.996153
	HPV+PMA-CTRL-	0	(—Inf-Inf)	0.598575		0	(—Inf-2.8081E+122)	0.0774483	NA	(—Inf-Inf)	0.372187		0	(—Inf-Inf)	0.243001	NA	(—Inf-Inf)	0.215006		5.35508e+55	(0-Inf)	0.678191	NA	(—Inf-Inf)	0.999989		NA	(0-Inf)	0.0712353	NA	(NA-NA)	NA		NA	(NA-NA)	NA			1.28702e-191	(—Inf-Inf)	0.59557		1.9075e+13	(0-2.4674720070296E+277)	0.921493		0	(—Inf-Inf)	0.328743
	HPV+PMA-CTRL+	0	(—Inf-Inf)	0.675912		0	(—Inf-Inf)	0.370981	NA	(—Inf-Inf)	0.246144		0	(—Inf-Inf)	0.65868	0	(—Inf-Inf)	0.999271		0	(—Inf-Inf)	0.561267	0	(—Inf-Inf)	0.998478		0	(—Inf-Inf)	0.991881	NA	(NA-NA)	NA		0	(—Inf-Inf)	0.583062			6.62672e-06	(—Inf-Inf)	0.986584		3.66298e-140	(—Inf-Inf)	0.696058		NA	(—Inf-Inf)	0.276242
	HPV+PMA+CTRL-	NA	(—Inf-Inf)	0.201644		NA	(—Inf-Inf)	0.69104	0	(—Inf-Inf)	0.81328		0	(—Inf-Inf)	0.207095	0	(—Inf-Inf)	0.997309		0	(—Inf-Inf)	0.314916	NA	(—Inf-Inf)	0.999991		NA	(0-Inf)	0.0776653	NA	(NA-NA)	NA		7.02936e+249	(—Inf-Inf)	0.526584			3.26742e-296	(—Inf-Inf)	0.821828		5.14038e-28	(0-1.5800927432162E+191)	0.806612		0	(—Inf-Inf)	0.997177
	HPV+PMA+CTRL+	0	(—Inf-Inf)	0.923977		0	(—Inf-Inf)	0.538622	NA	(—Inf-Inf)	0.168509		3.24081e+13	(—Inf-Inf)	0.987385	NA	(NA-NA)	NA		1.55904e-240	(—Inf-Inf)	0.736401	NA	(NA-NA)	NA		NA	(—Inf-Inf)	0.611395	NA	(NA-NA)	NA		0	(—Inf-Inf)	0.475847			NA	(NA-Inf)	NA		NA	(NA-NA)	NA		NA	(NA-NA)	NA
	HPV-PMA+CTRL-	5.17365e-10	(0-7.4867E+113)	0.882517		1.04072e-92	(—Inf-Inf)	0.686823	5.54957e-32	(0-3.1364E+145)	0.728901		1.02674e-74	(—Inf-Inf)	0.761897	2.04503e+18	(0-1.8237E+130)	0.748533		0	(—Inf-Inf)	0.62979	6.4754e+39	(0-2.3E+205)	0.637406		0	(—Inf-Inf)	0.382749	2.46907e+57	(0-1.8551E+169)	0.314673		NA	(NA-NA)	NA			1.09676e+27	(0-2.6726979747568E+142)	0.646016		3.37363e+65	(0-2.5980484602798E+219)	0.403947		1.72221e-11	(0-4.2738830879226E+114)	0.866392
	Cox Univariate model for the fold change in proportions	Fold Changes for Week 5 from Baseline								Fold Changes for Week 5 from Baseline
		OS				RFS			Tumor Samples	OS			RFS
	Clone Groups	HR	95% CI	P		HR	95% CI	P		HR	95% CI	P	HR	95% CI	P
Blood Samples	HPV-PMA-CTRL+	33370.5	(—Inf-Inf)	0.999184		1.64578	(0.85-3.18)	0.137708		0.593686	(0.36-0.98)	0.0426558	0.660423	(0.48-0.92)	0.0126351
	HPV-PMA+CTRL+	0.839264	(0.19-3.72)	0.817658		1.16064	(0.49-2.72)	0.732249		1.48322	(0.76-2.89)	0.24626	1.73915	(1.14-2.64)	0.00964681
	HPV+PMA-CTRL-	182.193	(—Inf-Inf)	0.999857		1.75231	(0.99-3.1)	0.0532941		1.01007	(0.66-1.54)	0.962922	1.03345	(0.79-1.34)	0.806196
	HPV+PMA-CTRL+	0.736976	(0.11-4.84)	0.750636		0.919881	(0.59-1.42)	0.707535		0.532669	(0.27-1.05)	0.0696529	0.86712	(0.57-1.32)	0.508049
	HPV+PMA+CTRL-	21897.1	(—Inf-Inf)	0.999757		1.12231	(0.48-2.61)	0.788897		0.738045	(0.42-1.3)	0.28987	0.754474	(0.53-1.07)	0.114878
	HPV+PMA+CTRL+	NA	(NA-NA)	NA		0.998981	(0.51-1.97)	0.997644		NA	(NA-NA)	NA	NA	(NA-NA)	NA
	HPV-PMA+CTRL-	0.0459741	(0-13.97)	0.291006		0.772666	(0.28-2.1)	0.613956		1.24361	(0.81-1.91)	0.318237	1.13804	(0.87-1.49)	0.351712

## Sheet: HPV Positive Subset
		HPV Positive Subset
		Baseline							Week 1							Week 3							Week 5							Week 12									Baseline								Week 1
		OS				RFS			OS				RFS			OS			RFS				OS				RFS			OS				RFS					OS				RFS				OS
	Flow Variable	HR	95% CI	P		HR	95% CI	P	HR	95% CI	P		HR	95% CI	P	HR	95% CI	P		HR	95% CI	P	HR	95% CI	P		HR	95% CI	P	HR	95% CI	P		HR	95% CI	P			HR	95% CI	P		HR	95% CI	P		HR	95% CI	P
Blood Samples	CD11b+CD11c- (% Live Lymphocytes)	NA	NA	NA		NA	NA	NA	NA	NA	NA		NA	NA	NA	NA	NA	NA		NA	NA	NA	NA	NA	NA		NA	NA	NA	NA	NA	NA		NA	NA	NA		Tumor Samples	NA	NA	NA		NA	NA	NA		NA	NA	NA
	CD11b+CD11c-CD40+	NA	NA	NA		NA	NA	NA	NA	NA	NA		NA	NA	NA	NA	NA	NA		NA	NA	NA	NA	NA	NA		NA	NA	NA	NA	NA	NA		NA	NA	NA			NA	NA	NA		NA	NA	NA		NA	NA	NA
	CD11b+CD11c-CD40+ (% Live Lymphocytes)	NA	NA	NA		NA	NA	NA	NA	NA	NA		NA	NA	NA	NA	NA	NA		NA	NA	NA	NA	NA	NA		NA	NA	NA	NA	NA	NA		NA	NA	NA			NA	NA	NA		NA	NA	NA		NA	NA	NA
	CD11b+CD11c-CD86+	NA	NA	NA		NA	NA	NA	NA	NA	NA		NA	NA	NA	NA	NA	NA		NA	NA	NA	NA	NA	NA		NA	NA	NA	NA	NA	NA		NA	NA	NA			NA	NA	NA		NA	NA	NA		NA	NA	NA
	CD11b+CD11c-CD86+ (% Live Lymphocytes)	NA	NA	NA		NA	NA	NA	NA	NA	NA		NA	NA	NA	NA	NA	NA		NA	NA	NA	NA	NA	NA		NA	NA	NA	NA	NA	NA		NA	NA	NA			NA	NA	NA		NA	NA	NA		NA	NA	NA
	CD11b+CD40+ (% Live Lymphocytes)	NA	NA	NA		NA	NA	NA	NA	NA	NA		NA	NA	NA	NA	NA	NA		NA	NA	NA	NA	NA	NA		NA	NA	NA	NA	NA	NA		NA	NA	NA			NA	NA	NA		NA	NA	NA		NA	NA	NA
	CD11b+CD86+ (% Live Lymphocytes)	NA	NA	NA		NA	NA	NA	NA	NA	NA		NA	NA	NA	NA	NA	NA		NA	NA	NA	NA	NA	NA		NA	NA	NA	NA	NA	NA		NA	NA	NA			NA	NA	NA		NA	NA	NA		NA	NA	NA
	CD11c+CD11b+ (% Live Lymphocytes)	NA	NA	NA		NA	NA	NA	NA	NA	NA		NA	NA	NA	NA	NA	NA		NA	NA	NA	NA	NA	NA		NA	NA	NA	NA	NA	NA		NA	NA	NA			NA	NA	NA		NA	NA	NA		NA	NA	NA
	CD11c+CD11b- (% Live Lymphocytes)	NA	NA	NA		NA	NA	NA	NA	NA	NA		NA	NA	NA	NA	NA	NA		NA	NA	NA	NA	NA	NA		NA	NA	NA	NA	NA	NA		NA	NA	NA			NA	NA	NA		NA	NA	NA		NA	NA	NA
	CD11c+CD11b+CD40+	NA	NA	NA		NA	NA	NA	NA	NA	NA		NA	NA	NA	NA	NA	NA		NA	NA	NA	NA	NA	NA		NA	NA	NA	NA	NA	NA		NA	NA	NA			NA	NA	NA		NA	NA	NA		NA	NA	NA
	CD11c+CD11b-CD40+ (% Live Lymphocytes)	NA	NA	NA		NA	NA	NA	NA	NA	NA		NA	NA	NA	NA	NA	NA		NA	NA	NA	NA	NA	NA		NA	NA	NA	NA	NA	NA		NA	NA	NA			NA	NA	NA		NA	NA	NA		NA	NA	NA
	CD11c+CD11b+CD40+ (% Live Lymphocytes)	NA	NA	NA		NA	NA	NA	NA	NA	NA		NA	NA	NA	NA	NA	NA		NA	NA	NA	NA	NA	NA		NA	NA	NA	NA	NA	NA		NA	NA	NA			NA	NA	NA		NA	NA	NA		NA	NA	NA
	CD11c+CD11b-CD40+	NA	NA	NA		NA	NA	NA	NA	NA	NA		NA	NA	NA	NA	NA	NA		NA	NA	NA	NA	NA	NA		NA	NA	NA	NA	NA	NA		NA	NA	NA			NA	NA	NA		NA	NA	NA		NA	NA	NA
	CD11c+CD11b+CD86+	NA	NA	NA		NA	NA	NA	NA	NA	NA		NA	NA	NA	NA	NA	NA		NA	NA	NA	NA	NA	NA		NA	NA	NA	NA	NA	NA		NA	NA	NA			NA	NA	NA		NA	NA	NA		NA	NA	NA
	CD11c+CD11b+CD86+ (% Live Lymphocytes)	NA	NA	NA		NA	NA	NA	NA	NA	NA		NA	NA	NA	NA	NA	NA		NA	NA	NA	NA	NA	NA		NA	NA	NA	NA	NA	NA		NA	NA	NA			NA	NA	NA		NA	NA	NA		NA	NA	NA
	CD11c+CD11b-CD86+ (% Live Lymphocytes)	NA	NA	NA		NA	NA	NA	NA	NA	NA		NA	NA	NA	NA	NA	NA		NA	NA	NA	NA	NA	NA		NA	NA	NA	NA	NA	NA		NA	NA	NA			NA	NA	NA		NA	NA	NA		NA	NA	NA
	CD11c+CD11b-CD86+	NA	NA	NA		NA	NA	NA	NA	NA	NA		NA	NA	NA	NA	NA	NA		NA	NA	NA	NA	NA	NA		NA	NA	NA	NA	NA	NA		NA	NA	NA			NA	NA	NA		NA	NA	NA		NA	NA	NA
	CD11c+CD40+ (% Live Lymphocytes)	NA	NA	NA		NA	NA	NA	NA	NA	NA		NA	NA	NA	NA	NA	NA		NA	NA	NA	NA	NA	NA		NA	NA	NA	NA	NA	NA		NA	NA	NA			NA	NA	NA		NA	NA	NA		NA	NA	NA
	CD11c+CD86+ (% Live Lymphocytes)	NA	NA	NA		NA	NA	NA	NA	NA	NA		NA	NA	NA	NA	NA	NA		NA	NA	NA	NA	NA	NA		NA	NA	NA	NA	NA	NA		NA	NA	NA			NA	NA	NA		NA	NA	NA		NA	NA	NA
	CD11c+HLA-DR+ DC (% Live Lymphocytes)	NA	NA	NA		-	-	0.74	NA	NA	NA		-	-	0.69	NA	NA	NA		NA	NA	NA	NA	NA	NA		NA	NA	NA	NA	NA	NA		NA	NA	NA			NA	NA	NA		-	-	0.74		NA	NA	NA
	CD11c+HLA-DR+CD141+ DC (% Live Lymphocytes)	NA	NA	NA		-	-	0.6	NA	NA	NA		-	-	1	NA	NA	NA		NA	NA	NA	NA	NA	NA		NA	NA	NA	NA	NA	NA		NA	NA	NA			NA	NA	NA		-	-	0.6		NA	NA	NA
	CD3+ (% Live Lymphocytes)	-	-	0.63		-	-	0.89	NA	NA	NA		-	-	0.68	NA	NA	NA		-	-	0.63	NA	NA	NA		-	-	0.39	NA	NA	NA		-	-	0.33			-	-	0.26		0.96	(0.91-1.02)	0.15		-	-	0.54
	CD3+ Counts	-	-	0.54		-	-	0.23	NA	NA	NA		-	-	0.51	NA	NA	NA		-	-	0.99	NA	NA	NA		-	-	0.71	NA	NA	NA		-	-	0.91			-	-	0.76		-	-	0.95		-	-	0.62
	CD3-CD11b+CD11c-	NA	NA	NA		NA	NA	NA	NA	NA	NA		NA	NA	NA	NA	NA	NA		NA	NA	NA	NA	NA	NA		NA	NA	NA	NA	NA	NA		NA	NA	NA			NA	NA	NA		NA	NA	NA		NA	NA	NA
	CD3-CD11b+CD40+	NA	NA	NA		NA	NA	NA	NA	NA	NA		NA	NA	NA	NA	NA	NA		NA	NA	NA	NA	NA	NA		NA	NA	NA	NA	NA	NA		NA	NA	NA			NA	NA	NA		NA	NA	NA		NA	NA	NA
	CD3-CD11b+CD86+	NA	NA	NA		NA	NA	NA	NA	NA	NA		NA	NA	NA	NA	NA	NA		NA	NA	NA	NA	NA	NA		NA	NA	NA	NA	NA	NA		NA	NA	NA			NA	NA	NA		NA	NA	NA		NA	NA	NA
	CD3-CD11c+CD11b+	NA	NA	NA		NA	NA	NA	NA	NA	NA		NA	NA	NA	NA	NA	NA		NA	NA	NA	NA	NA	NA		NA	NA	NA	NA	NA	NA		NA	NA	NA			NA	NA	NA		NA	NA	NA		NA	NA	NA
	CD3-CD11c+CD11b-	NA	NA	NA		NA	NA	NA	NA	NA	NA		NA	NA	NA	NA	NA	NA		NA	NA	NA	NA	NA	NA		NA	NA	NA	NA	NA	NA		NA	NA	NA			NA	NA	NA		NA	NA	NA		NA	NA	NA
	CD3-CD11c+CD40+	NA	NA	NA		NA	NA	NA	NA	NA	NA		NA	NA	NA	NA	NA	NA		NA	NA	NA	NA	NA	NA		NA	NA	NA	NA	NA	NA		NA	NA	NA			NA	NA	NA		NA	NA	NA		NA	NA	NA
	CD3-CD11c+CD86+	NA	NA	NA		NA	NA	NA	NA	NA	NA		NA	NA	NA	NA	NA	NA		NA	NA	NA	NA	NA	NA		NA	NA	NA	NA	NA	NA		NA	NA	NA			NA	NA	NA		NA	NA	NA		NA	NA	NA
	CD4+ (% CD3+)	-	-	1		0.9	(0.77-1.05)	0.19	NA	NA	NA		-	-	0.37	NA	NA	NA		-	-	0.45	NA	NA	NA		-	-	0.71	NA	NA	NA		-	-	0.83			0.94	(0.86-1.02)	0.16		-	-	0.22		-	-	0.8
	CD4+ (% Live Lymphocytes)	-	-	1		-	-	0.32	NA	NA	NA		-	-	0.89	NA	NA	NA		-	-	0.56	NA	NA	NA		-	-	0.48	NA	NA	NA		1.28	(0.91-1.81)	0.15			-	-	0.3		0.89	(0.76-1.04)	0.13		-	-	0.62
	CD4+CD69+ (% Live Lymphocytes)	-	-	0.95		-	-	0.77	NA	NA	NA		-	-	0.72	NA	NA	NA		-	-	0.24	NA	NA	NA		-	-	0.42	NA	NA	NA		-	-	0.93			-	-	0.65		-	-	0.3		NA	NA	NA
	CD4+CTLA4+ (% Live Lymphocytes)	-	-	0.54		-	-	0.81	NA	NA	NA		-	-	0.57	NA	NA	NA		-	-	0.77	NA	NA	NA		14.36	(0.31-675.16)	0.18	NA	NA	NA		10.61	(0.63-177.95)	0.1			-	-	0.39		-	-	0.38		-	-	0.63
	CD4+Foxp3+ (% Live Lymphocytes)	-	-	0.93		-	-	0.42	NA	NA	NA		-	-	0.85	NA	NA	NA		-	-	0.35	NA	NA	NA		-	-	0.62	NA	NA	NA		-	-	0.88			-	-	0.32		-	-	0.57		-	-	0.59
	CD4+GrzB+(% Live Lymphocytes)	NA	NA	NA		NA	NA	NA	NA	NA	NA		NA	NA	NA	NA	NA	NA		NA	NA	NA	NA	NA	NA		NA	NA	NA	NA	NA	NA		NA	NA	NA			NA	NA	NA		NA	NA	NA		NA	NA	NA
	CD4+IFNg+ (% Live Lymphocytes)	-	-	0.64		-	-	0.76	NA	NA	NA		-	-	0.49	NA	NA	NA		-	-	0.53	NA	NA	NA		-	-	0.43	NA	NA	NA		-	-	0.43			-	-	0.99		59.99	(0.23-15783.56)	0.15		NA	NA	NA
	CD4+Ki-67+ (% Live Lymphocytes)	-	-	1		-	-	0.99	NA	NA	NA		-	-	0.89	NA	NA	NA		-	-	1	NA	NA	NA		-	-	0.32	NA	NA	NA		296.46	(0.43-202375.38)	0.09			-	-	0.34		-	-	0.92		-	-	0.85
	CD4+PD1+ (% Live Lymphocytes)	-	-	0.88		-	-	0.59	NA	NA	NA		-	-	0.86	NA	NA	NA		1.09	(0.97-1.24)	0.16	NA	NA	NA		-	-	0.29	NA	NA	NA		-	-	0.99			-	-	0.45		-	-	0.58		-	-	0.6
	CD69+ (% CD4+)	-	-	0.56		-	-	0.99	NA	NA	NA		-	-	0.72	NA	NA	NA		-	-	0.31	NA	NA	NA		-	-	0.62	NA	NA	NA		-	-	0.64			-	-	0.8		-	-	0.31		NA	NA	NA
	CD69+ (% CD8+)	-	-	0.95		-	-	0.47	NA	NA	NA		-	-	0.4	NA	NA	NA		-	-	0.56	NA	NA	NA		-	-	0.24	NA	NA	NA		-	-	0.91			-	-	0.46		-	-	0.45		NA	NA	NA
	CD8+ (% CD3+)	-	-	0.85		-	-	0.89	NA	NA	NA		-	-	0.57	NA	NA	NA		-	-	0.63	NA	NA	NA		-	-	0.72	NA	NA	NA		1.07	(0.97-1.8)	0.16			-	-	0.59		0.95	(0.90-1.01)	0.1		-	-	0.26
	CD8+ (% Live Lymphocytes)	-	-	0.7		-	-	0.79	NA	NA	NA		-	-	0.55	NA	NA	NA		-	-	0.82	NA	NA	NA		-	-	0.38	NA	NA	NA		1.06	(0.97-1.15)	0.19			-	-	0.33		0.86	(0.71-1.04)	0.12		-	-	0.61
	CD8+CD69+ (% Live Lymphocytes)	-	-	0.87		-	-	0.6	NA	NA	NA		-	-	0.35	NA	NA	NA		-	-	0.51	NA	NA	NA		-	-	0.22	NA	NA	NA		9.69	(0.34-276.39)	0.18			-	-	0.58		-	-	0.41		NA	NA	NA
	CD8+CTLA4+ (% Live Lymphocytes)	-	-	0.99		-	-	0.58	NA	NA	NA		-	-	0.28	NA	NA	NA		-	-	0.78	NA	NA	NA		11.15	(0.41-301.77)	0.15	NA	NA	NA		15.54	(0.67-360.25)	0.09			-	-	0.47		-	-	0.85		-	-	0.62
	CD8+GrnzB+ (% Live Lymphocytes)	-	-	0.58		-	-	0.76	NA	NA	NA		-	-	0.39	NA	NA	NA		2.82	(0.76-10.49)	0.12	NA	NA	NA		-	-	0.44	NA	NA	NA		1.07	(0.98-1.18)	0.15			-	-	0.68		-	-	0.46		NA	NA	NA
	CD8.IFNg.....Live...Peptide.Media.	-	-	1		-	-	0.36	NA	NA	NA		-	-	0.99	NA	NA	NA		-	-	0.6	NA	NA	NA		-	-	0.69	NA	NA	NA		-	-	0.87			-	-	0.98		-	-	0.97		-	-	1
	CD8+IFNg+ (% Live Lymphocytes)	-	-	0.95		-	-	0.62	NA	NA	NA		-	-	0.63	NA	NA	NA		815337471	(0.01-1.3877E+20)	0.12	NA	NA	NA		-	-	0.48	NA	NA	NA		-	-	0.5			-	-	0.41		-	-	0.88		NA	NA	NA
	CD8+Ki-67+ (% Live Lymphocytes)	-	-	0.63		-	-	0.69	NA	NA	NA		-	-	0.62	NA	NA	NA		-	-	0.21	NA	NA	NA		-	-	0.97	NA	NA	NA		43.29	(0.64-2920.26)	0.08			-	-	0.83		-	-	0.42		-	-	0.93
	CD8+PD1+ (% Live Lymphocytes)	-	-	0.82		-	-	0.49	NA	NA	NA		-	-	0.41	NA	NA	NA		1.26	(0.91-1.76)	0.16	NA	NA	NA		-	-	0.6	NA	NA	NA		-	-	0.87			-	-	0.61		-	-	0.41		-	-	0.99
	CTLA4+ (% CD8+)	-	-	0.89		-	-	0.58	NA	NA	NA		-	-	0.85	NA	NA	NA		-	-	0.59	NA	NA	NA		1.07	(0.97-1.19)	0.19	NA	NA	NA		3.54	(0.97-12.79)	0.05			-	-	0.78		1.09	(1.01-1.17)	0.03		-	-	0.57
	CTLA4+ (% CD4+)	-	-	0.29		-	-	0.85	NA	NA	NA		-	-	0.3	NA	NA	NA		-	-	0.75	NA	NA	NA		-	-	1	NA	NA	NA		1.68	(0.93-3.05)	0.09			1.05	(0.98-1.13)	0.19		-	-	0.33		-	-	0.59
	FoxP3+ (% CD4+)	-	-	0.6		-	-	0.6	NA	NA	NA		-	-	0.75	NA	NA	NA		-	-	0.24	NA	NA	NA		-	-	0.31	NA	NA	NA		-	-	0.9			-	-	0.31		1.04	(0.99-1.10)	0.13		-	-	0.77
	GrzB+ (% CD8+)	-	-	0.63		-	-	0.94	NA	NA	NA		-	-	0.24	NA	NA	NA		1.1	(0.96-1.27)	0.17	NA	NA	NA		-	-	0.87	NA	NA	NA		-	-	0.25			NA	NA	0.32		-	-	0.39		NA	NA	NA
	GrzB+ (% CD4+)	NA	NA	NA		NA	NA	NA	NA	NA	NA		NA	NA	NA	NA	NA	NA		NA	NA	NA	NA	NA	NA		NA	NA	NA	NA	NA	NA		NA	NA	NA			NA	NA	NA		NA	NA	NA		NA	NA	NA
	HLA-DR-CD11b+CD33+ MDSC (% Live Lymphocytes)	NA	NA	NA		-	-	0.58	NA	NA	NA		-	-	0.76	NA	NA	NA		NA	NA	NA	NA	NA	NA		NA	NA	NA	NA	NA	NA		NA	NA	NA			NA	NA	NA		-	-	0.58		NA	NA	NA
	IFNg+ (% CD4+)	-	-	0.72		-	-	0.91	NA	NA	NA		-	-	0.47	NA	NA	NA		-	-	0.51	NA	NA	NA		-	-	0.42	NA	NA	NA		-	-	0.38			-	-	0.88		1.07	(1.00-1.14)	0.06		NA	NA	NA
	IFNg+ (% CD8+)	-	-	0.97		-	-	0.6	NA	NA	NA		-	-	0.41	NA	NA	NA		5.03	(0.69-36.45)	0.11	NA	NA	NA		-	-	0.57	NA	NA	NA		-	-	0.66			-	-	0.21		-	-	0.55		NA	NA	NA
	IFNg+ (% CD8+) (Peptide-Media)	-	-	1		-	-	0.74	NA	NA	NA		-	-	0.77	NA	NA	NA		-	-	0.59	NA	NA	NA		-	-	0.99	NA	NA	NA		-	-	0.38			-	-	0.99		-	-	0.72		-	-	1
	Ki67+ (% CD4+)	-	-	0.99		-	-	0.99	NA	NA	NA		-	-	0.66	NA	NA	NA		28.32	(0.31-2571.30)	0.15	NA	NA	NA		-	-	0.33	NA	NA	NA		3.69	(0.79-17.20)	0.1			-	-	0.32		1.08	(1.00-1.17)	0.08		-	-	0.97
	Ki67+ (% CD8+)	-	-	0.7		-	-	0.71	NA	NA	NA		-	-	0.2	NA	NA	NA		-	-	0.43	NA	NA	NA		-	-	0.35	NA	NA	NA		23.42	(0.71-770.37)	0.08			1.29	(1.00-1.66)	0.05		1.2	(1.05-1.37)	0.01		-	-	0.46
	Live	NA	NA	NA		NA	NA	NA	NA	NA	NA		NA	NA	NA	NA	NA	NA		NA	NA	NA	NA	NA	NA		NA	NA	NA	NA	NA	NA		NA	NA	NA			NA	NA	NA		NA	NA	NA		NA	NA	NA
	Live Lymphocytes Count	NA	NA	NA		NA	NA	NA	NA	NA	NA		NA	NA	NA	NA	NA	NA		NA	NA	NA	NA	NA	NA		NA	NA	NA	NA	NA	NA		NA	NA	NA			NA	NA	NA		NA	NA	NA		NA	NA	NA
	PD1+ (% CD8+)	-	-	0.79		-	-	0.48	NA	NA	NA		-	-	0.7	NA	NA	NA		1.03	(0.99-1.06)	0.15	NA	NA	NA		-	-	0.65	NA	NA	NA		-	-	0.91			-	-	0.95		-	-	0.97		-	-	0.57
	PD1+ (% CD4+)	-	-	0.94		-	-	0.65	NA	NA	NA		-	-	0.84	NA	NA	NA		1.03	(0.99-1.08)	0.15	NA	NA	NA		-	-	0.49	NA	NA	NA		-	-	0.87			-	-	0.92		-	-	0.52		-	-	0.69
	TCR Variable
Blood Samples	Max Frequency	-	-	0.44		-	-	0.19	-	-	0.75		4.23042e-36	0.186444721786736--0.75	0.17	NA	NA	NA		-	-	0.49	NA	NA	NA		-	-	0.72	NA	NA	NA		-	-	0.85		Tumor Samples	261849	(0.01-7.48518E+12)	0.15		-	-	0.43		-	-	0.89
	Max Productive Frequency	-	-	0.46		2.9151e+45	(5.75353E-19 - 1.477E+109)	0.16	-	-	0.74		9.35248e-33	0.161878040358561--0.74	0.16	NA	NA	NA		-	-	0.48	NA	NA	NA		-	-	0.79	NA	NA	NA		-	-	0.96			41852.6	(0.02-1.08233E+11)	0.16		-	-	0.41		-	-	0.94
	Outofframe Rearrangements	-	-	0.57		-	-	0.22	-	-	0.3		-	-	0.93	NA	NA	NA		-	-	0.74	NA	NA	NA		-	-	0.2	NA	NA	NA		-	-	0.52			-	-	0.53		-	-	0.98		-	-	0.53
	Outofframe Templates	-	-	0.53		-	-	0.34	-	-	0.4		-	-	0.62	NA	NA	NA		-	-	0.57	NA	NA	NA		-	-	0.22	NA	NA	NA		-	-	0.47			-	-	0.42		-	-	0.72		-	-	0.63
	Productive Clonality	-	-	0.72		-	-	0.69	-	-	0.43		-	-	0.26	NA	NA	NA		-	-	0.99	NA	NA	NA		-	-	0.5	NA	NA	NA		-	-	0.82			-	-	0.26		-	-	0.23		-	-	0.77
	Productive Entropy	-	-	0.64		-	-	0.26	-	-	0.88		-	-	0.2	NA	NA	NA		-	-	0.66	NA	NA	NA		-	-	0.96	NA	NA	NA		-	-	0.77			1.3	(0.99-1.70)	0.06		-	-	0.32		-	-	0.61
	Productive Rearrangements	-	-	0.47		-	-	0.23	-	-	0.31		-	-	0.68	NA	NA	NA		-	-	0.96	NA	NA	NA		-	-	0.2	NA	NA	NA		-	-	0.51			-	-	0.61		-	-	0.94		-	-	0.49
	Productive Templates	-	-	0.45		-	-	0.24	-	-	0.42		-	-	0.71	NA	NA	NA		-	-	0.55	NA	NA	NA		-	-	0.21	NA	NA	NA		-	-	0.6			-	-	0.25		-	-	0.59		-	-	0.56
	Sample Entropy	-	-	0.61		-	-	0.25	-	-	0.81		-	-	0.24	NA	NA	NA		-	-	0.76	NA	NA	NA		-	-	0.94	NA	NA	NA		-	-	0.76			1.27	(0.99-1.64)	0.06		-	-	0.3		-	-	0.58
	Total Rearrangements	-	-	0.47		-	-	0.21	-	-	0.31		-	-	0.73	NA	NA	NA		-	-	0.97	NA	NA	NA		-	-	0.2	NA	NA	NA		-	-	0.51			-	-	0.59		-	-	0.96		-	-	0.5
	Total Templates	-	-	0.44		-	-	0.25	-	-	0.42		-	-	0.69	NA	NA	NA		-	-	0.55	NA	NA	NA		-	-	0.21	NA	NA	NA		-	-	0.57			-	-	0.27		-	-	0.61		-	-	0.57
		Fold Changes for Week 5 from Baseline								Fold Changes for Week 5 from Baseline
		OS				RFS				OS			RFS
		HR	95% CI	P		HR	95% CI	P		HR	95% CI	P	HR	95% CI	P
Blood Samples	CD3+ Counts	NA	NA	NA		2.03	(0.76-5.44)	0.16	Tumor Samples	-	-	0.44	-	-	0.59
	CD3+ (% Live Lymphocytes)	NA	NA	NA		-	-	0.55		-	-	0.71	-	-	0.62
	CD4+ (% CD3+)	NA	NA	NA		-	-	0.57		-	-	0.4	-	-	0.33
	CD69+ (% CD4+)	NA	NA	NA		-	-	0.2		NA	NA	NA	-	-	0.26
	IFNg+ (% CD4+)	NA	NA	NA		-	-	0.43		NA	NA	NA	0.68	(0.44-1.06)	0.09
	CD4+CD69+ (% Live Lymphocytes)	NA	NA	NA		-	-	1		NA	NA	NA	-	-	0.21
	CD4+CTLA4+ (% Live Lymphocytes)	NA	NA	NA		-	-	0.59		-	-	0.99	-	-	0.84
	CD8+ (% CD3+)	NA	NA	NA		-	-	0.81		-	-	0.91	-	-	0.74
	CD69+ (% CD8+)	NA	NA	NA		-	-	0.24		NA	NA	NA	-	-	0.43
	CD8+CD69+ (% Live Lymphocytes)	NA	NA	NA		-	-	0.29		NA	NA	NA	-	-	0.72
	CD4+ (% Live Lymphocytes)	NA	NA	NA		-	-	0.96		-	-	0.97	-	-	0.41
	CD8+ (% Live Lymphocytes)	NA	NA	NA		-	-	0.45		-	-	0.82	-	-	0.84
	Live Lymphocytes Count	-	-	-		-	-	-		NA	NA	NA	NA	NA	NA
	Live	-	-	-		-	-	-		NA	NA	NA	NA	NA	NA
	GrzB+ (% CD4+)	-	-	-		-	-	-		NA	NA	NA	NA	NA	NA
	PD1+ (% CD4+)	NA	NA	NA		-	-	0.62		-	-	0.44	-	-	0.75
	Ki67+ (% CD8+)	NA	NA	NA		-	-	0.78		-	-	0.85	-	-	0.21
	PD1+ (% CD8+)	NA	NA	NA		-	-	0.7		-	-	0.93	0.89	(0.76-1.04)	0.14
	CD11c+CD11b+ (% Live Lymphocytes)	-	-	-		-	-	-		NA	NA	NA	NA	NA	NA
	CD11c+CD11b- (% Live Lymphocytes)	-	-	-		-	-	-		NA	NA	NA	NA	NA	NA
	CD11b+CD40+ (% Live Lymphocytes)	-	-	-		-	-	-		NA	NA	NA	NA	NA	NA
	CD11c+CD40+ (% Live Lymphocytes)	-	-	-		-	-	-		NA	NA	NA	NA	NA	NA
	CD11c+CD86+ (% Live Lymphocytes)	-	-	-		-	-	-		NA	NA	NA	NA	NA	NA
	CD11b+CD11c-CD40+ (% Live Lymphocytes)	-	-	-		-	-	-		NA	NA	NA	NA	NA	NA
	CD11b+CD11c-CD40+	-	-	-		-	-	-		NA	NA	NA	NA	NA	NA
	CD11c+HLA-DR+CD141+ DC (% Live Lymphocytes)	-	-	-		-	-	-		NA	NA	NA	NA	NA	NA
	CD3-CD11b+CD11c-	-	-	-		-	-	-		NA	NA	NA	NA	NA	NA
	CD3-CD11b+CD40+	-	-	-		-	-	-		NA	NA	NA	NA	NA	NA
	CD3-CD11c+CD11b+	-	-	-		-	-	-		NA	NA	NA	NA	NA	NA
	CD3-CD11c+CD40+	-	-	-		-	-	-		NA	NA	NA	NA	NA	NA
	CTLA4+ (% CD8+)	NA	NA	NA		-	-	0.33		-	-	0.99	0.91	(0.83-1.01)	0.07
	Total Templates	NA	NA	NA		-	-	0.9		-	-	0.5	0.74	(0.5-1.09)	0.13
	Productive Templates	NA	NA	NA		-	-	0.89		-	-	0.5	0.75	(0.51-1.09)	0.13
	Outofframe Templates	NA	NA	NA		-	-	0.91		-	-	0.53	0.71	(0.46-1.09)	0.12
	Total Rearrangements	NA	NA	NA		-	-	0.72		-	-	0.53	0.75	(0.51-1.11)	0.15
	Productive Rearrangements	NA	NA	NA		-	-	0.72		-	-	0.53	0.76	(0.52-1.11)	0.15
	Outofframe Rearrangements	NA	NA	NA		-	-	0.73		-	-	0.56	0.72	(0.46-1.14)	0.16
	Productive Clonality	NA	NA	NA		-	-	1		-	-	0.98	-	-	0.3
	Productive Entropy	NA	NA	NA		-	-	0.57		0.09	(0.005 - 1.85)	0.12	0.14	(0.02-1.17)	0.07
	Sample Entropy	NA	NA	NA		-	-	0.56		0.09	(0.005 - 1.72)	0.11	0.13	(0.02-1.17)	0.07
	Cox Univariate model for the proportions of clones present in each group
		Baseline							Week 1							Week 3							Week 5							Week 12									Baseline							Week 1
		OS			RFS				OS				RFS			OS			RFS				OS			RFS				OS			RFS					Tumor Samples	OS			RFS				OS
	Clone Groups	HR	95% CI	P	HR		95% CI	P	HR	95% CI	P		HR	95% CI	P	HR	95% CI	P	HR		95% CI	P	HR	95% CI	P	HR		95% CI	P	HR	95% CI	P	HR		95% CI	P			HR	95% CI	P	HR		95% CI	P	HR	95% CI	P
Blood Samples	HPV-PMA-CTRL+	-	-	0.837486	Undefined		(-inf - +inf)	0.172866	-	-	0.77		0	(-inf - +inf)	0.11	NA	NA	NA	-	-	-	0.934878	NA	NA	NA	-	-	-	0.4	NA	NA	NA	-	-	-	0.45			Undefined	(2.0933E-119 - Inf)	0.081602	Undefined		(1.1295E+146-inf)	0.00886346	-	-	0.500371
	HPV-PMA+CTRL+	-	-	0.981938	-	-	-	0.978145	-	-	1		-	-	1	NA	NA	NA	-	-	-	0.36	NA	NA	NA	-	-	-	0.39	NA	NA	NA	-	-	-	0.83			-	-	0.997819	-	-	-	0.578459	-	-	1
	HPV+PMA-CTRL-	-	-	0.686016	-	-	-	0.742629	-	-	0.47		0	(-inf - +inf)	0.18	NA	NA	NA	-	-	-	0.86	NA	NA	NA	-	-	-	0.6	NA	NA	NA	NA		NA	NA			-	-	0.997389	-	-	-	0.596439	-	-	0.600385
	HPV+PMA-CTRL+	-	-	0.867192	-	-	-	0.74	-	-	1		-	-	0.95	NA	NA	NA	-	-	-	0.39	NA	NA	NA	-	-	-	1	NA	NA	NA	-	-	-	0.9			-	-	0.993871	-	-	-	0.985909	Undefined	(0- inf)	0.129888
	HPV+PMA+CTRL-	-	-	0.999209	-	-	-	0.57547	-	-	0.7		-	-	0.71	NA	NA	NA	-	-	-	0.59	NA	NA	NA	-	-	-	0.77	NA	NA	NA	-	-	-	0.78			-	-	0.996207	-	-	-	0.691735	-	-	1
	HPV+PMA+CTRL+	-	-	0.762571	-	-	-	0.87	-	-	1		Undefined	(-inf - +inf)	0.17	NA	NA	NA	-	-	-	0.95	NA	NA	NA	-	-	-	0.38	NA	NA	NA	-	-	-	0.59			NA	NA	NA	NA	NA	NA	NA	NA	NA	NA
	HPV-PMA+CTRL-	-	-	0.77	-	-	-	0.24	-	-	0.8		-	-	0.83	NA	NA	NA	-	-	-	0.34	NA	NA	NA	-	-	-	0.41	NA	NA	NA	8.1382e+132	8.13819e+132	(4.53333E-29 - 1.4608E+294)	0.11			6.4363e+178	(127429613738.516 - inf)	0.04	1.71215e+104		(2.41832E-14 - 1.2122E+222)	0.08	-	-	0.49	1.83314e+190
	Cox Univariate model for the fold change in proportions
		Fold Changes for Week 5 from Baseline								Fold Changes for Week 5 from Baseline
		OS				RFS			Tumor Samples	OS			RFS
	Clone Groups	HR	95% CI	P		HR	95% CI	P		HR	95% CI	P	HR	95% CI	P
Blood Samples	HPV-PMA-CTRL+	NA	NA	NA		-	-	0.6		0.5135	(0.23-1.17)	0.11	0.65	(0.43 - 0.99)	0.05
	HPV-PMA+CTRL+	NA	NA	NA		-	-	0.49		-	-	0.99	-	-	0.98
	HPV+PMA-CTRL-	NA	NA	NA		-	-	0.35		-	-	0.65	-	-	0.49
	HPV+PMA-CTRL+	NA	NA	NA		-	-	0.74		-	-	0.21	1.51	(0.87 - 2.61)	0.14
	HPV+PMA+CTRL-	NA	NA	NA		NA	NA	NA		-	-	0.4	-	-	0.55
	HPV+PMA+CTRL+	NA	NA	NA		-	-	0.93		NA	NA	NA	NA	NA	NA
	HPV-PMA+CTRL-	NA	NA	NA		-	-	0.75		1.63	(0.77 - 3.47)	0.2	-	-	0.38
[truncated: 21 more columns]

## Sheet: HPV 16 Subset
		HPV 16 Subset
		Baseline							Week 1							Week 3							Week 5							Week 12									Baseline								Week 1
		OS				RFS			OS				RFS			OS				RFS			OS				RFS			OS				RFS					OS				RFS				OS
	Flow Variable	HR	95% CI	P		HR	95% CI	P	HR	95% CI	P		HR	95% CI	P	HR	95% CI	P		HR	95% CI	P	HR	95% CI	P		HR	95% CI	P	HR	95% CI	P		HR	95% CI	P			HR	95% CI	P		HR	95% CI	P		HR	95% CI	P
Blood Samples	CD11b+CD11c- (% Live Lymphocytes)	NA	NA	NA		NA	NA	NA	NA	NA	NA		NA	NA	NA	NA	NA	NA		NA	NA	NA	NA	NA	NA		NA	NA	NA	NA	NA	NA		NA	NA	NA		Tumor Samples	NA	NA	NA		NA	NA	NA		NA	NA	NA
	CD11b+CD11c-CD40+	NA	NA	NA		NA	NA	NA	NA	NA	NA		NA	NA	NA	NA	NA	NA		NA	NA	NA	NA	NA	NA		NA	NA	NA	NA	NA	NA		NA	NA	NA			NA	NA	NA		NA	NA	NA		NA	NA	NA
	CD11b+CD11c-CD40+ (% Live Lymphocytes)	NA	NA	NA		NA	NA	NA	NA	NA	NA		NA	NA	NA	NA	NA	NA		NA	NA	NA	NA	NA	NA		NA	NA	NA	NA	NA	NA		NA	NA	NA			NA	NA	NA		NA	NA	NA		NA	NA	NA
	CD11b+CD11c-CD86+	NA	NA	NA		NA	NA	NA	NA	NA	NA		NA	NA	NA	NA	NA	NA		NA	NA	NA	NA	NA	NA		NA	NA	NA	NA	NA	NA		NA	NA	NA			NA	NA	NA		NA	NA	NA		NA	NA	NA
	CD11b+CD11c-CD86+ (% Live Lymphocytes)	NA	NA	NA		NA	NA	NA	NA	NA	NA		NA	NA	NA	NA	NA	NA		NA	NA	NA	NA	NA	NA		NA	NA	NA	NA	NA	NA		NA	NA	NA			NA	NA	NA		NA	NA	NA		NA	NA	NA
	CD11b+CD40+ (% Live Lymphocytes)	NA	NA	NA		NA	NA	NA	NA	NA	NA		NA	NA	NA	NA	NA	NA		NA	NA	NA	NA	NA	NA		NA	NA	NA	NA	NA	NA		NA	NA	NA			NA	NA	NA		NA	NA	NA		NA	NA	NA
	CD11b+CD86+ (% Live Lymphocytes)	NA	NA	NA		NA	NA	NA	NA	NA	NA		NA	NA	NA	NA	NA	NA		NA	NA	NA	NA	NA	NA		NA	NA	NA	NA	NA	NA		NA	NA	NA			NA	NA	NA		NA	NA	NA		NA	NA	NA
	CD11c+CD11b+ (% Live Lymphocytes)	NA	NA	NA		NA	NA	NA	NA	NA	NA		NA	NA	NA	NA	NA	NA		NA	NA	NA	NA	NA	NA		NA	NA	NA	NA	NA	NA		NA	NA	NA			NA	NA	NA		NA	NA	NA		NA	NA	NA
	CD11c+CD11b- (% Live Lymphocytes)	NA	NA	NA		NA	NA	NA	NA	NA	NA		NA	NA	NA	NA	NA	NA		NA	NA	NA	NA	NA	NA		NA	NA	NA	NA	NA	NA		NA	NA	NA			NA	NA	NA		NA	NA	NA		NA	NA	NA
	CD11c+CD11b+CD40+	NA	NA	NA		NA	NA	NA	NA	NA	NA		NA	NA	NA	NA	NA	NA		NA	NA	NA	NA	NA	NA		NA	NA	NA	NA	NA	NA		NA	NA	NA			NA	NA	NA		NA	NA	NA		NA	NA	NA
	CD11c+CD11b-CD40+ (% Live Lymphocytes)	NA	NA	NA		NA	NA	NA	NA	NA	NA		NA	NA	NA	NA	NA	NA		NA	NA	NA	NA	NA	NA		NA	NA	NA	NA	NA	NA		NA	NA	NA			NA	NA	NA		NA	NA	NA		NA	NA	NA
	CD11c+CD11b+CD40+ (% Live Lymphocytes)	NA	NA	NA		NA	NA	NA	NA	NA	NA		NA	NA	NA	NA	NA	NA		NA	NA	NA	NA	NA	NA		NA	NA	NA	NA	NA	NA		NA	NA	NA			NA	NA	NA		NA	NA	NA		NA	NA	NA
	CD11c+CD11b-CD40+	NA	NA	NA		NA	NA	NA	NA	NA	NA		NA	NA	NA	NA	NA	NA		NA	NA	NA	NA	NA	NA		NA	NA	NA	NA	NA	NA		NA	NA	NA			NA	NA	NA		NA	NA	NA		NA	NA	NA
	CD11c+CD11b+CD86+	NA	NA	NA		NA	NA	NA	NA	NA	NA		NA	NA	NA	NA	NA	NA		NA	NA	NA	NA	NA	NA		NA	NA	NA	NA	NA	NA		NA	NA	NA			NA	NA	NA		NA	NA	NA		NA	NA	NA
	CD11c+CD11b+CD86+ (% Live Lymphocytes)	NA	NA	NA		NA	NA	NA	NA	NA	NA		NA	NA	NA	NA	NA	NA		NA	NA	NA	NA	NA	NA		NA	NA	NA	NA	NA	NA		NA	NA	NA			NA	NA	NA		NA	NA	NA		NA	NA	NA
	CD11c+CD11b-CD86+ (% Live Lymphocytes)	NA	NA	NA		NA	NA	NA	NA	NA	NA		NA	NA	NA	NA	NA	NA		NA	NA	NA	NA	NA	NA		NA	NA	NA	NA	NA	NA		NA	NA	NA			NA	NA	NA		NA	NA	NA		NA	NA	NA
	CD11c+CD11b-CD86+	NA	NA	NA		NA	NA	NA	NA	NA	NA		NA	NA	NA	NA	NA	NA		NA	NA	NA	NA	NA	NA		NA	NA	NA	NA	NA	NA		NA	NA	NA			NA	NA	NA		NA	NA	NA		NA	NA	NA
	CD11c+CD40+ (% Live Lymphocytes)	NA	NA	NA		NA	NA	NA	NA	NA	NA		NA	NA	NA	NA	NA	NA		NA	NA	NA	NA	NA	NA		NA	NA	NA	NA	NA	NA		NA	NA	NA			NA	NA	NA		NA	NA	NA		NA	NA	NA
	CD11c+CD86+ (% Live Lymphocytes)	NA	NA	NA		NA	NA	NA	NA	NA	NA		NA	NA	NA	NA	NA	NA		NA	NA	NA	NA	NA	NA		NA	NA	NA	NA	NA	NA		NA	NA	NA			NA	NA	NA		NA	NA	NA		NA	NA	NA
	CD11c+HLA-DR+ DC (% Live Lymphocytes)	NA	NA	NA		-	-	0.662507	NA	NA	NA		-	-	0.855935	NA	NA	NA		NA	NA	NA	NA	NA	NA		NA	NA	NA	NA	NA	NA		NA	NA	NA			NA	NA	NA		-	-	0.662507		NA	NA	NA
	CD11c+HLA-DR+CD141+ DC (% Live Lymphocytes)	NA	NA	NA		NA	NA	NA	NA	NA	NA		NA	NA	NA	NA	NA	NA		NA	NA	NA	NA	NA	NA		NA	NA	NA	NA	NA	NA		NA	NA	NA			NA	NA	NA		NA	NA	NA		NA	NA	NA
	CD3+ (% Live Lymphocytes)	-	-	0.99923		-	-	0.556316	NA	NA	NA		-	-	0.468025	NA	NA	NA		-	-	0.724971	NA	NA	NA		-	-	0.999579	NA	NA	NA		-	-	0.937254			-	-	0.443435		-	-	0.28841		NA	NA	NA
	CD3+ Counts	-	-	0.997102		-	-	0.996763	NA	NA	NA		-	-	0.527842	NA	NA	NA		-	-	0.996108	NA	NA	NA		-	-	0.999579	NA	NA	NA		-	-	0.74601			-	-	0.447195		-	-	0.527942		NA	NA	NA
	CD3-CD11b+CD11c-	NA	NA	NA		NA	NA	NA	NA	NA	NA		NA	NA	NA	NA	NA	NA		NA	NA	NA	NA	NA	NA		NA	NA	NA	NA	NA	NA		NA	NA	NA			NA	NA	NA		NA	NA	NA		NA	NA	NA
	CD3-CD11b+CD40+	NA	NA	NA		NA	NA	NA	NA	NA	NA		NA	NA	NA	NA	NA	NA		NA	NA	NA	NA	NA	NA		NA	NA	NA	NA	NA	NA		NA	NA	NA			NA	NA	NA		NA	NA	NA		NA	NA	NA
	CD3-CD11b+CD86+	NA	NA	NA		NA	NA	NA	NA	NA	NA		NA	NA	NA	NA	NA	NA		NA	NA	NA	NA	NA	NA		NA	NA	NA	NA	NA	NA		NA	NA	NA			NA	NA	NA		NA	NA	NA		NA	NA	NA
	CD3-CD11c+CD11b+	NA	NA	NA		NA	NA	NA	NA	NA	NA		NA	NA	NA	NA	NA	NA		NA	NA	NA	NA	NA	NA		NA	NA	NA	NA	NA	NA		NA	NA	NA			NA	NA	NA		NA	NA	NA		NA	NA	NA
	CD3-CD11c+CD11b-	NA	NA	NA		NA	NA	NA	NA	NA	NA		NA	NA	NA	NA	NA	NA		NA	NA	NA	NA	NA	NA		NA	NA	NA	NA	NA	NA		NA	NA	NA			NA	NA	NA		NA	NA	NA		NA	NA	NA
	CD3-CD11c+CD40+	NA	NA	NA		NA	NA	NA	NA	NA	NA		NA	NA	NA	NA	NA	NA		NA	NA	NA	NA	NA	NA		NA	NA	NA	NA	NA	NA		NA	NA	NA			NA	NA	NA		NA	NA	NA		NA	NA	NA
	CD3-CD11c+CD86+	NA	NA	NA		NA	NA	NA	NA	NA	NA		NA	NA	NA	NA	NA	NA		NA	NA	NA	NA	NA	NA		NA	NA	NA	NA	NA	NA		NA	NA	NA			NA	NA	NA		NA	NA	NA		NA	NA	NA
	CD4+ (% CD3+)	-	-	0.999499		-	-	0.99953	NA	NA	NA		-	-	0.377581	NA	NA	NA		-	-	0.334055	NA	NA	NA		-	-	0.999579	NA	NA	NA		-	-	0.401055			-	-	0.998562		-	-	0.353135		NA	NA	NA
	CD4+ (% Live Lymphocytes)	-	-	0.999613		-	-	0.999609	NA	NA	NA		-	-	0.775109	NA	NA	NA		-	-	0.884112	NA	NA	NA		-	-	0.999579	NA	NA	NA		-	-	0.834131			-	-	0.615082		-	-	0.365277		NA	NA	NA
	CD4+CD69+ (% Live Lymphocytes)	-	-	0.998851		-	-	0.99885	NA	NA	NA		-	-	0.774034	NA	NA	NA		-	-	0.684338	NA	NA	NA		-	-	0.999579	NA	NA	NA		-	-	0.35508			-	-	0.662743		-	-	0.769462		NA	NA	NA
	CD4+CTLA4+ (% Live Lymphocytes)	-	-	0.80171		-	-	0.775349	NA	NA	NA		-	-	0.868431	NA	NA	NA		-	-	0.709473	NA	NA	NA		-	-	0.999579	NA	NA	NA		-	-	0.313052			-	-	0.496579		-	-	0.311421		NA	NA	NA
	CD4+Foxp3+ (% Live Lymphocytes)	-	-	0.616891		-	-	0.784665	NA	NA	NA		-	-	0.519805	NA	NA	NA		-	-	0.625665	NA	NA	NA		-	-	0.999579	NA	NA	NA		-	-	0.733954			-	-	0.434579		-	-	0.452831		NA	NA	NA
	CD4+GrzB+(% Live Lymphocytes)	NA	NA	NA		NA	NA	NA	NA	NA	NA		NA	NA	NA	NA	NA	NA		NA	NA	NA	NA	NA	NA		NA	NA	NA	NA	NA	NA		NA	NA	NA			NA	NA	NA		NA	NA	NA		NA	NA	NA
	CD4+IFNg+ (% Live Lymphocytes)	-	-	0.998028		-	-	0.652407	NA	NA	NA		-	-	0.422229	NA	NA	NA		-	-	0.873008	NA	NA	NA		-	-	0.999579	NA	NA	NA		-	-	0.294809			-	-	0.995709		-	-	0.458123		NA	NA	NA
	CD4+Ki-67+ (% Live Lymphocytes)	-	-	0.998389		-	-	0.996035	NA	NA	NA		-	-	0.882366	NA	NA	NA		-	-	0.99788	NA	NA	NA		-	-	0.999579	NA	NA	NA		-	-	0.430297			-	-	0.993818		-	-	0.972585		NA	NA	NA
	CD4+PD1+ (% Live Lymphocytes)	-	-	0.999287		-	-	0.999291	NA	NA	NA		-	-	0.857861	NA	NA	NA		-	-	0.647751	NA	NA	NA		-	-	0.999579	NA	NA	NA		-	-	0.99705			-	-	0.63738		-	-	0.404089		NA	NA	NA
	CD69+ (% CD4+)	-	-	0.999488		-	-	0.999563	NA	NA	NA		-	-	0.716268	NA	NA	NA		-	-	0.675701	NA	NA	NA		-	-	0.999579	NA	NA	NA		-	-	0.337071			-	-	0.878091		-	-	0.39228		NA	NA	NA
	CD69+ (% CD8+)	-	-	0.684281		-	-	0.891926	NA	NA	NA		-	-	0.59123	NA	NA	NA		-	-	0.789717	NA	NA	NA		-	-	0.999579	NA	NA	NA		-	-	0.365519			-	-	0.447177		-	-	0.527126		NA	NA	NA
	CD8+ (% CD3+)	-	-	0.703208		-	-	0.698163	NA	NA	NA		-	-	0.606795	NA	NA	NA		-	-	0.378073	NA	NA	NA		-	-	0.999579	NA	NA	NA		-	-	0.529322			-	-	0.35121		-	-	0.262986		NA	NA	NA
	CD8+ (% Live Lymphocytes)	-	-	0.920783		-	-	0.89064	NA	NA	NA		-	-	0.473601	NA	NA	NA		-	-	0.390573	NA	NA	NA		-	-	0.999579	NA	NA	NA		-	-	0.823416			-	-	0.56212		-	-	0.433561		NA	NA	NA
	CD8+CD69+ (% Live Lymphocytes)	-	-	0.999323		-	-	0.622146	NA	NA	NA		-	-	0.386433	NA	NA	NA		-	-	0.843436	NA	NA	NA		-	-	0.999579	NA	NA	NA		-	-	0.421666			-	-	0.595851		-	-	0.516255		NA	NA	NA
	CD8+CTLA4+ (% Live Lymphocytes)	-	-	0.62766		-	-	0.624619	NA	NA	NA		-	-	0.817005	NA	NA	NA		-	-	0.713394	NA	NA	NA		-	-	0.999579	NA	NA	NA		-	-	0.999111			-	-	0.63366		-	-	0.494027		NA	NA	NA
	CD8+GrnzB+ (% Live Lymphocytes)	-	-	0.804013		-	-	0.614517	NA	NA	NA		-	-	0.44196	NA	NA	NA		-	-	0.420132	NA	NA	NA		-	-	0.999579	NA	NA	NA		-	-	0.816505			-	-	0.728832		-	-	0.760867		NA	NA	NA
	CD8.IFNg.....Live...Peptide.Media.	-	-	0.999103		-	-	0.998494	NA	NA	NA		-	-	0.997607	NA	NA	NA		-	-	0.645838	NA	NA	NA		-	-	0.999579	NA	NA	NA		-	-	0.998704			NA	NA	NA		-	-	0.998563		NA	NA	NA
	CD8+IFNg+ (% Live Lymphocytes)	-	-	0.999612		-	-	0.999609	NA	NA	NA		-	-	0.594405	NA	NA	NA		-	-	0.317964	NA	NA	NA		-	-	0.999579	NA	NA	NA		-	-	0.954017			-	-	0.284597		-	-	0.553645		NA	NA	NA
	CD8+Ki-67+ (% Live Lymphocytes)	-	-	0.999458		-	-	0.999141	NA	NA	NA		-	-	0.612173	NA	NA	NA		-	-	0.607527	NA	NA	NA		-	-	0.999579	NA	NA	NA		-	-	0.998669			-	-	0.780449		-	-	0.370364		NA	NA	NA
	CD8+PD1+ (% Live Lymphocytes)	-	-	0.904251		-	-	0.917105	NA	NA	NA		-	-	0.998486	NA	NA	NA		-	-	0.901077	NA	NA	NA		-	-	0.999579	NA	NA	NA		-	-	0.698165			-	-	0.618202		-	-	0.411695		NA	NA	NA
	CTLA4+ (% CD8+)	-	-	0.616769		-	-	0.59908	NA	NA	NA		-	-	0.846128	NA	NA	NA		-	-	0.567796	NA	NA	NA		-	-	0.999579	NA	NA	NA		-	-	0.578163			-	-	0.764644		1.30437	(0.94-1.81)	0.112296		NA	NA	NA
	CTLA4+ (% CD4+)	-	-	0.999422		-	-	0.681064	NA	NA	NA		-	-	0.551532	NA	NA	NA		-	-	0.705884	NA	NA	NA		-	-	0.999579	NA	NA	NA		-	-	0.313847			-	-	0.998979		-	-	0.293632		NA	NA	NA
	FoxP3+ (% CD4+)	-	-	0.976258		-	-	0.703589	NA	NA	NA		-	-	0.489878	NA	NA	NA		-	-	0.568922	NA	NA	NA		-	-	0.999579	NA	NA	NA		-	-	0.737847			-	-	0.976258		1.05102	(0.98-1.13)	0.189918		NA	NA	NA
	GrzB+ (% CD8+)	-	-	0.832469		-	-	0.956118	NA	NA	NA		-	-	0.318155	NA	NA	NA		-	-	0.996799	NA	NA	NA		-	-	0.999579	NA	NA	NA		-	-	0.880817			-	-	0.998717		0.900335	(0.78-1.04)	0.162389		NA	NA	NA
	GrzB+ (% CD4+)	NA	NA	NA		NA	NA	NA	NA	NA	NA		NA	NA	NA	NA	NA	NA		NA	NA	NA	NA	NA	NA		NA	NA	NA	NA	NA	NA		NA	NA	NA			NA	NA	NA		NA	NA	NA		NA	NA	NA
	HLA-DR-CD11b+CD33+ MDSC (% Live Lymphocytes)	-	-	NA		-	-	0.596632	NA	NA	NA		-	-	0.580991	NA	NA	NA		NA	NA	NA	NA	NA	NA		NA	NA	NA	NA	NA	NA		NA	NA	NA			NA	NA	NA		-	-	0.596632		NA	NA	NA
	IFNg+ (% CD4+)	-	-	0.639682		-	-	0.733714	NA	NA	NA		-	-	0.377861	NA	NA	NA		-	-	0.933369	NA	NA	NA		-	-	0.999579	NA	NA	NA		-	-	0.293854			-	-	0.650456		-	-	0.265221		NA	NA	NA
	IFNg+ (% CD8+)	-	-	0.999504		-	-	0.999468	NA	NA	NA		-	-	0.398878	NA	NA	NA		-	-	0.606999	NA	NA	NA		-	-	0.999579	NA	NA	NA		-	-	0.748552			-	-	0.999534		1.25157	(0.98-1.6)	0.0729187		NA	NA	NA
	IFNg+ (% CD8+) (Peptide-Media)	-	-	0.998964		-	-	0.997794	NA	NA	NA		-	-	0.997906	NA	NA	NA		-	-	0.644011	NA	NA	NA		-	-	0.999579	NA	NA	NA		-	-	0.997526			NA	NA	NA		-	-	0.998319		NA	NA	NA
	Ki67+ (% CD4+)	-	-	0.998405		-	-	0.99574	NA	NA	NA		-	-	0.93115	NA	NA	NA		-	-	0.998768	NA	NA	NA		-	-	0.684981	NA	NA	NA		-	-	0.437293			-	-	0.995059		1.0643	(0.98-1.16)	0.16335		NA	NA	NA
	Ki67+ (% CD8+)	-	-	0.998892		-	-	0.998954	NA	NA	NA		-	-	0.370939	NA	NA	NA		-	-	0.783523	NA	NA	NA		-	-	0.373658	NA	NA	NA		-	-	0.998866			-	-	0.999781		1.16332	(1.00-1.35)	0.0512183		NA	NA	NA
	Live	NA	NA	NA		NA	NA	NA	NA	NA	NA		NA	NA	NA	NA	NA	NA		NA	NA	NA	NA	NA	NA		NA	NA	NA	NA	NA	NA		NA	NA	NA			NA	NA	NA		NA	NA	NA		NA	NA	NA
	Live Lymphocytes Count	NA	NA	NA		NA	NA	NA	NA	NA	NA		NA	NA	NA	NA	NA	NA		NA	NA	NA	NA	NA	NA		NA	NA	NA	NA	NA	NA		NA	NA	NA			NA	NA	NA		NA	NA	NA		NA	NA	NA
	PD1+ (% CD8+)	-	-	0.999621		-	-	0.819837	NA	NA	NA		-	-	0.809221	NA	NA	NA		-	-	0.768399	NA	NA	NA		-	-	0.999579	NA	NA	NA		-	-	0.949754			-	-	0.889984		-	-	0.740346		NA	NA	NA
	PD1+ (% CD4+)	-	-	0.999531		-	-	0.999593	NA	NA	NA		-	-	0.847021	NA	NA	NA		-	-	0.647206	NA	NA	NA		-	-	0.999579	NA	NA	NA		-	-	0.99696			-	-	0.395919		1.08056	(0.97-1.2)	0.157879		NA	NA	NA
	TCR Variable
Blood Samples	Max Frequency	-	-	0.999579		-	-	0.999579	-	-	0.686463		-	-	0.992987	NA	NA	NA		-	-	0.43723	NA	NA	NA		-	-	0.999579	NA	NA	NA		-	-	0.369752		Tumor Samples	-	-	0.347164		-	-	0.286267		-	-	0.923794
	Max Productive Frequency	-	-	0.999579		-	-	0.999579	-	-	0.683101		-	-	0.993918	NA	NA	NA		-	-	0.421191	NA	NA	NA		-	-	0.999579	NA	NA	NA		-	-	0.368179			-	-	0.301724		-	-	0.283726		-	-	0.934672
	Outofframe Rearrangements	-	-	0.999579		-	-	0.999579	-	-	0.999381		-	-	0.388214	NA	NA	NA		-	-	0.805862	NA	NA	NA		-	-	0.999579	NA	NA	NA		-	-	0.998097			-	-	0.451972		-	-	0.410408		-	-	0.693233
	Outofframe Templates	-	-	0.999579		-	-	0.999579	-	-	0.999378		-	-	0.209245	NA	NA	NA		-	-	0.831946	NA	NA	NA		-	-	0.999579	NA	NA	NA		-	-	0.45983			-	-	0.42354		-	-	0.5269		-	-	0.733055
	Productive Clonality	-	-	0.999579		-	-	0.999579	-	-	0.537738		-	-	0.995591	NA	NA	NA		-	-	0.996397	NA	NA	NA		-	-	0.999579	NA	NA	NA		-	-	0.487593			-	-	0.2779		-	-	0.412034		-	-	0.671126
	Productive Entropy	-	-	0.999579		-	-	0.999579	-	-	0.817236		-	-	0.240101	NA	NA	NA		-	-	0.376067	NA	NA	NA		-	-	0.999579	NA	NA	NA		-	-	0.64242			-	-	0.865392		-	-	0.200084		-	-	0.8177
	Productive Rearrangements	-	-	0.999579		-	-	0.999579	-	-	0.999288		-	-	0.583393	NA	NA	NA		-	-	0.531098	NA	NA	NA		-	-	0.999579	NA	NA	NA		-	-	0.998048			-	-	0.428533		-	-	0.38629		-	-	0.651858
	Productive Templates	-	-	0.999579		-	-	0.999579	-	-	0.999447		0.999917	(0.999-1.000)	0.183963	NA	NA	NA		-	-	0.866143	NA	NA	NA		-	-	0.999579	NA	NA	NA		-	-	0.693535			-	-	0.365141		-	-	0.542158		-	-	0.71618
	Sample Entropy	-	-	0.999579		-	-	0.999579	-	-	0.707459		-	-	0.28664	NA	NA	NA		-	-	0.392317	NA	NA	NA		-	-	0.999579	NA	NA	NA		-	-	0.614171			-	-	0.924873		-	-	0.213504		-	-	0.792101
	Total Rearrangements	-	-	0.999579		-	-	0.999579	-	-	0.999313		-	-	0.537301	NA	NA	NA		-	-	0.578181	NA	NA	NA		-	-	0.999579	NA	NA	NA		-	-	0.998011			-	-	0.431197		-	-	0.38986		-	-	0.660698
	Total Templates	-	-	0.999579		-	-	0.999579	-	-	0.99944		0.999931	(0.999-1.000)	0.1871	NA	NA	NA		-	-	0.856256	NA	NA	NA		-	-	0.999579	NA	NA	NA		-	-	0.654129			-	-	0.373019		-	-	0.536582		-	-	0.720058
		Fold Changes for Week 5 from Baseline								Fold Changes for Week 5 from Baseline
		OS				RFS				OS			RFS
		HR	95% CI	P		HR	95% CI	P		HR	95% CI	P	HR	95% CI	P
Blood Samples	CD3+ Counts	NA	NA	NA		NA	NA	NA	Tumor Samples	NA	NA	NA	-	-	0.598521
	CD3+ (% Live Lymphocytes)	NA	NA	NA		NA	NA	NA		NA	NA	NA	-	-	0.999607
	CD4+ (% CD3+)	NA	NA	NA		NA	NA	NA		NA	NA	NA	-	-	0.667858
	CD69+ (% CD4+)	NA	NA	NA		NA	NA	NA		NA	NA	NA	-	-	0.999008
	IFNg+ (% CD4+)	NA	NA	NA		NA	NA	NA		NA	NA	NA	-	-	0.462071
	CD4+CD69+ (% Live Lymphocytes)	NA	NA	NA		NA	NA	NA		NA	NA	NA	-	-	0.999237
	CD4+CTLA4+ (% Live Lymphocytes)	NA	NA	NA		NA	NA	NA		NA	NA	NA	-	-	0.693521
	CD8+ (% CD3+)	NA	NA	NA		NA	NA	NA		NA	NA	NA	-	-	0.999134
	CD69+ (% CD8+)	NA	NA	NA		NA	NA	NA		NA	NA	NA	-	-	0.839264
	CD8+CD69+ (% Live Lymphocytes)	NA	NA	NA		NA	NA	NA		NA	NA	NA	-	-	0.996545
	CD4+ (% Live Lymphocytes)	NA	NA	NA		NA	NA	NA		NA	NA	NA	-	-	0.999376
	CD8+ (% Live Lymphocytes)	NA	NA	NA		NA	NA	NA		NA	NA	NA	-	-	0.999564
	Live Lymphocytes Count	-	-	-		-	-	-		NA	NA	NA	NA	NA	NA
	Live	-	-	-		-	-	-		NA	NA	NA	NA	NA	NA
	GrzB+ (% CD4+)	-	-	-		-	-	-		NA	NA	NA	NA	NA	NA
	PD1+ (% CD4+)	NA	NA	NA		NA	NA	NA		NA	NA	NA	-	-	0.999232
	Ki67+ (% CD8+)	NA	NA	NA		NA	NA	NA		NA	NA	NA	-	-	0.999358
	PD1+ (% CD8+)	NA	NA	NA		NA	NA	NA		NA	NA	NA	-	-	0.998736
	CD11c+CD11b+ (% Live Lymphocytes)	-	-	-		-	-	-		NA	NA	NA	NA	NA	NA
	CD11c+CD11b- (% Live Lymphocytes)	-	-	-		-	-	-		NA	NA	NA	NA	NA	NA
	CD11b+CD40+ (% Live Lymphocytes)	-	-	-		-	-	-		NA	NA	NA	NA	NA	NA
	CD11c+CD40+ (% Live Lymphocytes)	-	-	-		-	-	-		NA	NA	NA	NA	NA	NA
	CD11c+CD86+ (% Live Lymphocytes)	-	-	-		-	-	-		NA	NA	NA	NA	NA	NA
	CD11b+CD11c-CD40+ (% Live Lymphocytes)	-	-	-		-	-	-		NA	NA	NA	NA	NA	NA
	CD11b+CD11c-CD40+	-	-	-		-	-	-		NA	NA	NA	NA	NA	NA
	CD11c+HLA-DR+CD141+ DC (% Live Lymphocytes)	-	-	-		-	-	-		NA	NA	NA	NA	NA	NA
	CD3-CD11b+CD11c-	-	-	-		-	-	-		NA	NA	NA	NA	NA	NA
	CD3-CD11b+CD40+	-	-	-		-	-	-		NA	NA	NA	NA	NA	NA
	CD3-CD11c+CD11b+	-	-	-		-	-	-		NA	NA	NA	NA	NA	NA
	CD3-CD11c+CD40+	-	-	-		-	-	-		NA	NA	NA	NA	NA	NA
	CTLA4+ (% CD8+)	NA	NA	NA		NA	NA	NA		NA	NA	NA	-	-	0.506328
	Total Templates	NA	NA	NA		-	-	-		-	-	0.932765	-	-	0.282761
	Productive Templates	NA	NA	NA		-	-	-		-	-	0.932057	-	-	0.289915
	Outofframe Templates	NA	NA	NA		-	-	-		-	-	0.966525	-	-	0.255434
	Total Rearrangements	NA	NA	NA		-	-	-		-	-	0.84134	-	-	0.239745
	Productive Rearrangements	NA	NA	NA		-	-	-		-	-	0.826635	-	-	0.238685
	Outofframe Rearrangements	NA	NA	NA		-	-	-		-	-	0.925677	-	-	0.249028
	Productive Clonality	NA	NA	NA		-	-	-		-	-	0.522556	-	-	0.905887
	Productive Entropy	NA	NA	NA		-	-	-		-	-	0.637952	0.07	(0.002-3.273)	0.178468
	Sample Entropy	NA	NA	NA		-	-	-		-	-	0.677575	0.07	(0.001-3.805)	0.193684
	Cox Univariate model for the proportions of clones present in each group
		Baseline							Week 1							Week 3							Week 5							Week 12									Baseline							Week 1
		OS			RFS				OS				RFS			OS			RFS				OS			RFS				OS			RFS					Tumor Samples	OS				RFS			OS
	Clone Groups	HR	95% CI	P	HR		95% CI	P	HR	95% CI	P		HR	95% CI	P	HR	95% CI	P	HR		95% CI	P	HR	95% CI	P	HR		95% CI	P	HR	95% CI	P	HR		95% CI	P			HR	95% CI	P		HR	95% CI	P	HR	95% CI	P
Blood Samples	HPV-PMA-CTRL+	-	-	0.640526	-	-	-	0.640526	-	-	0.97		-	-	0.28	NA	NA	NA	-	-	-	1	NA	NA	NA	-	-	-	1	NA	NA	NA	-	-	-	0.88			Undefined	(2.0933E-119 - inf)	0.08		Undefined	(1.1295E+146 - inf)	0.01	-	-	0.5
	HPV-PMA+CTRL+	-	-	1	-	-	-	1	-	-	1		-	-	1	NA	NA	NA	-	-	-	1	NA	NA	NA	-	-	-	1	NA	NA	NA	-	-	-	0.86			-	-	1		-	-	0.58	-	-	1
	HPV+PMA-CTRL-	-	-	0.65	-	-	-	0.65	-	-	1		-	-	0.3	NA	NA	NA	-	-	-	0.87	NA	NA	NA	-	-	-	1	NA	NA	NA	NA	NA	NA	NA			-	-	1		-	-	0.6	-	-	0.6
	HPV+PMA-CTRL+	-	-	0.66	-	-	-	0.66	-	-	1		-	-	0.61	NA	NA	NA	-	-	-	1	NA	NA	NA	NA	NA	NA	NA	NA	NA	NA	-	-	-	0.87			-	-	0.99		-	-	0.99	Undefined	(0 - inf)	0.13
	HPV+PMA+CTRL-	-	-	1	-	-	-	1	-	-	0.8		-	-	0.78	NA	NA	NA	-	-	-	1	NA	NA	NA	-	-	-	1	NA	NA	NA	-	-	-	0.7			-	-	1		-	-	0.69	-	-	1
	HPV+PMA+CTRL+	-	-	0.71	-	-	-	0.72	-	-	1		-	-	0.41	NA	NA	NA	-	-	-	0.75	NA	NA	NA	-	-	-	1	NA	NA	NA	-	-	-	0.67			NA	NA	NA		NA	NA	NA	NA	NA	NA
	HPV-PMA+CTRL-	-	-	1	-	-	-	1	-	-	0.61		-	-	0.58	NA	NA	NA	-	-	-	0.99	NA	NA	NA	-	-	-	1	NA	NA	NA	-	-	-	1			-	-	1		0	(-inf - 1.62663641492752E+276)	0.17	-	-	0.295
	Cox Univariate model for the fold change in proportions
		Fold Changes for Week 5 from Baseline								Fold Changes for Week 5 from Baseline
		OS				RFS			Tumor Samples	OS			RFS
	Clone Groups	HR	95% CI	P		HR	95% CI	P		HR	95% CI	P	HR	95% CI	P
Blood Samples	HPV-PMA-CTRL+	NA	NA	NA		NA	NA	NA		-	-	1	-	-	0.92
	HPV-PMA+CTRL+	NA	NA	NA		NA	NA	NA		-	-	0.74	-	-	0.48
	HPV+PMA-CTRL-	NA	NA	NA		NA	NA	NA		-	-	0.53	-	-	0.99
	HPV+PMA-CTRL+	NA	NA	NA		NA	NA	NA		-	-	1	-	-	0.93
	HPV+PMA+CTRL-	NA	NA	NA		NA	NA	NA		-	-	0.22	0.38	(0.15-0.93)	0.04
	HPV+PMA+CTRL+	NA	NA	NA		NA	NA	NA		NA	NA	NA	NA	NA	NA
	HPV-PMA+CTRL-	NA	NA	NA		NA	NA	NA		-	-	1	1.65	(1.00-2.72)	0.05
[truncated: 21 more columns]
